# Supplementary material
Source: publisher figshare collection journal article supplement (https://tandf.figshare.com/articles/dataset/_/28331773)
Supplement: Supplementary file 1 [file 1]

## Sheet: SrY
Year	CITATION	LOCATION	LONGITUDE (MIN.)	LATITUDE (MAX.)	crust thickness	ROCK TYPE	ROCK NAME	AGE (MIN.)	AGE (MAX.)	GEOLOGICAL AGE	ERUPTION YEAR	SIO2	ACNK	SR/Y	Mg#	Rb/Sr	TIO2	AL2O3	Fe2O3T	Fe2O3	FeOT	FeO	CaO	MgO	MnO	K2O	Na2O	P2O5	LOI	Li	Sc	Ti	V	Cr	Mn	Co	Ni	Cu	Zn	Ga	As	Rb	Sr	Y	Zr	Nb	Cs	Ba	La
1996	[10965] PROUTEAU G. (1996)	LUZON ARC / LUZON ARC / BORNEO / MASUPA RIA VOLCANIC CENTER//	111.5	0.25	29.7	VOLCANIC ROCK	DACITE			MIOCENE		64	0.992877	51.1538	38.653	0.0578947	0.62	16.9		4.3			4.75	1.52	0.08	1.85	3.88	0.23	1.81		7.6		85	3		12	6					38.5	665	13		7		590	27
1996	[10965] PROUTEAU G. (1996)	LUZON ARC / LUZON ARC / BORNEO / MASUPA RIA VOLCANIC CENTER//	111.5	0.25	29.7	VOLCANIC ROCK	DACITE			MIOCENE		63.8	0.982078	50.3788	36.4594	0.0548872	0.63	16.72		4.38			4.74	1.41	0.08	1.84	3.9	0.24	2.02		7.8		85	4		12	7					36.5	665	13.2		7.3		610	27
2020	[23795] MAULANA A. (2020)	SULAWESI ARC / SULAWESI ARC / SULAWESI///	119	-1	26.43	PLUTONIC ROCK	GRANODIORITE			MIOCENE		64.6	0.999761	27.4603	36.4944	0.136802	0.617	17.13			3.66		3.31	1.18	0.082	3.37	4.54	0.2	1.11				64	0		5	0	0	50	17	0	71	519	18.9	309	8.2	2.6	1870	36
2020	[23710] BELLVER-BACA M. T. (2020)	ANDEAN ARC / NORTHERN ANDEAN VOLCANIC ZONE / ECUADOR / CHACHIMBIRO//	-78.37	0.77	48.73	VOLCANIC ROCK	DACITE			QUATERNARY		64.3	0.917316	72.9428	44.7964	0.0607214	0.57	16.63	4.93				5.27	2.02	0.06	1.62	4.13	0.15	-0.04		5.1		84.1	11.3		12.42	13.75	29.28	67.39	19.6		30.96	509.87	6.99	82.94	3.41	0.72	625.8	11.15
2020	[23710] BELLVER-BACA M. T. (2020)	ANDEAN ARC / NORTHERN ANDEAN VOLCANIC ZONE / ECUADOR / CHACHIMBIRO//	-78.37	0.77	48.73	VOLCANIC ROCK	DACITE			QUATERNARY		64.23	0.919984	71.2978	44.6464	0.0645142	0.57	16.67	4.96				5.25	2.02	0.06	1.63	4.14	0.15	0.06		6.2		82.6	11.9		12.43	13.35	16.82	65.08	19.9		33.21	514.77	7.22	85.38	3.52	0.93	633.48	11.95
2020	[23710] BELLVER-BACA M. T. (2020)	ANDEAN ARC / NORTHERN ANDEAN VOLCANIC ZONE / ECUADOR / CHACHIMBIRO//	-78.37	0.77	48.73	VOLCANIC ROCK	DACITE			QUATERNARY		67.73	0.973276	119.781	41.2071	0.0829902	0.34	16.02	3.08				3.77	1.09	0.04	2.02	4.51	0.11	1.21		3.2		45.6	3.7		6.68	6.15	28.73	57.2	18.7		43.54	524.64	4.38	76.62	2.62	1.39	773.06	8.16
2020	[23710] BELLVER-BACA M. T. (2020)	ANDEAN ARC / NORTHERN ANDEAN VOLCANIC ZONE / ECUADOR / CHACHIMBIRO//	-78.37	0.77	48.73	VOLCANIC ROCK	ANDESITE			QUATERNARY		62.84	0.932354	55.0827	44.2246	0.0632842	0.59	16.97	5.57				5.56	2.23	0.08	1.61	3.86	0.14	0.35		9		111.3	12.9		14.75	12.39	35.99	68.48	19.9		33.29	526.04	9.55	81.39	3.33	0.67	619.86	10.5
2011	[15515] CHIARADIA M.(2011) [GeoReM [6288] ]	ANDEAN ARC / NORTHERN ANDEAN VOLCANIC ZONE / ECUADOR / PILAVO//	-78.378	0.52	48.73	VOLCANIC ROCK	ANDESITE			QUATERNARY		57.57	0.857848	54.9697	43.7072	0.0356119	0.73	17.66	8.29				7.41	3.25	0.15	1.77	3.16	0.28	0.02		21.7		138	4		27	4	56	60			32.3	907	16.5	133	4	0.6	1119	27.7
2011	[15515] CHIARADIA M.(2011) [GeoReM [6288] ]	ANDEAN ARC / NORTHERN ANDEAN VOLCANIC ZONE / ECUADOR / PILAVO//	-78.3675	0.52	48.73	VOLCANIC ROCK	ANDESITE			QUATERNARY		56.07	0.863776	41.1111	44.7243	0.0256757	0.71	17.85	9.13				7.97	3.73	0.16	1.13	3.01	0.23	-0.15		23.8		161	13		25	6	48	68			17.1	666	16.2	80	3.2	0.4	734	14.6
2011	[15515] CHIARADIA M.(2011) [GeoReM [6288] ]	ANDEAN ARC / NORTHERN ANDEAN VOLCANIC ZONE / ECUADOR / PILAVO//	-78.378	0.52	48.73	VOLCANIC ROCK	ANDESITE			QUATERNARY		56.07	0.835346	61.3514	44.2576	0.0262555	0.76	17.43	8.93				7.7	3.58	0.15	1.86	2.95	0.28	0.28		22.8		168	6		19	6	37	77			29.8	1135	18.5	156	4.1	0.8	1412	43.9
2011	[15515] CHIARADIA M.(2011) [GeoReM [6288] ]	ANDEAN ARC / NORTHERN ANDEAN VOLCANIC ZONE / ECUADOR / PILAVO//	-78.378	0.52	48.73	VOLCANIC ROCK	ANDESITE			QUATERNARY		56.42	0.824661	78.1928	44.7472	0.0330508	0.81	17.22	8.07				7.23	3.3	0.13	2.36	3.15	0.32	0.45		22.1		159	17		19	10	37	76			42.9	1298	16.6	222	5.4	1.1	1465	50.1
2011	[15515] CHIARADIA M.(2011) [GeoReM [6288] ]	ANDEAN ARC / NORTHERN ANDEAN VOLCANIC ZONE / ECUADOR / PILAVO//	-78.378	0.52	48.73	VOLCANIC ROCK	ANDESITE			QUATERNARY		56.04	0.828358	49.3989	44.0628	0.0341814	0.76	17.22	8.85				7.68	3.52	0.16	1.67	3.05	0.27	0		21.3		241	6		22	8	63	90			30.9	904	18.3	131	4	0.4	1019	24.2
2011	[15515] CHIARADIA M.(2011) [GeoReM [6288] ]	ANDEAN ARC / NORTHERN ANDEAN VOLCANIC ZONE / ECUADOR / PILAVO//	-78.378	0.52	48.73	VOLCANIC ROCK	ANDESITE			QUATERNARY		57.37	0.810707	77.1069	43.9808	0.0359706	0.75	16.81	7.82				7.05	3.1	0.13	2.36	3.26	0.33	0.08		18.2		174	14		18	12	57	86			44.1	1226	15.9	206	5.2	1.1	1439	42.6
2011	[15515] CHIARADIA M.(2011) [GeoReM [6288] ]	ANDEAN ARC / NORTHERN ANDEAN VOLCANIC ZONE / ECUADOR / PILAVO//	-78.378	0.52	48.73	VOLCANIC ROCK	ANDESITE			QUATERNARY		56.54	0.911334	45.1613	44.1882	0.0202857	0.66	18.17	8.63				7.65	3.45	0.15	0.95	3.04	0.22	0.35		21		183	12		28	10	33	87			14.2	700	15.5	85	3.1	0.6	648	13.7
2011	[15515] CHIARADIA M.(2011) [GeoReM [6288] ]	ANDEAN ARC / NORTHERN ANDEAN VOLCANIC ZONE / ECUADOR / PILAVO//	-78.378	0.52	48.73	VOLCANIC ROCK	ANDESITE			QUATERNARY		56.94	0.825437	58.8623	43.9688	0.0347915	0.77	17.13	8.48				7.43	3.36	0.14	1.89	3.16	0.29	0		19.8		191	5		22	9	59	91			34.2	983	16.7	148	4.2	0.7	1170	30.7
2011	[15515] CHIARADIA M.(2011) [GeoReM [6288] ]	ANDEAN ARC / NORTHERN ANDEAN VOLCANIC ZONE / ECUADOR / PILAVO//	-78.378	0.52	48.73	VOLCANIC ROCK	ANDESITE			QUATERNARY		56.79	0.826115	64.2945	43.7369	0.038645	0.76	17.01	8.28				7.27	3.25	0.14	2.1	3.1	0.31	0.32		19.1		185	4		21	9	45	90			40.5	1048	16.3	167	4.5	1	1288	35.6
2011	[15515] CHIARADIA M.(2011) [GeoReM [6288] ]	ANDEAN ARC / NORTHERN ANDEAN VOLCANIC ZONE / ECUADOR / PILAVO//	-78.378	0.52	48.73	VOLCANIC ROCK	ANDESITE			QUATERNARY		56.59	0.831093	55.9412	44.2602	0.0371188	0.77	17.02	8.53				7.37	3.42	0.15	1.89	3.06	0.29	0.31		20.4		190	6		22	9	64	90			35.3	951	17	145	4.3	0.9	1136	30.2
2011	[15515] CHIARADIA M.(2011) [GeoReM [6288] ]	ANDEAN ARC / NORTHERN ANDEAN VOLCANIC ZONE / ECUADOR / PILAVO//	-78.3725	0.4906	48.73	VOLCANIC ROCK	ANDESITE			QUATERNARY		57.47	0.803582	79.2	44.6698	0.0340741	0.77	16.6	7.85				7.11	3.2	0.13	2.37	3.14	0.33	0.36		18.1		181	19		23	14	45	86			40.48	1188	15	138	4.6	1	1196	42.2
2021	[24426] ANDRADE S. D. (2021)	ANDEAN ARC / NORTHERN ANDEAN VOLCANIC ZONE / ECUADOR / PULULAHUA / CASITAHUA VOLCANICS/	-78.48	0.044	48.73	VOLCANIC ROCK	DACITE			QUATERNARY		64.8	0.980999	49.5652	38.5	0.0328947	0.52	17.15	5.22				4.87	1.65	0.07	0.98	4.6	0.14	0.02		8.7		113	5		13	5					15	456	9.2	66	3.2		495	8
2021	[24426] ANDRADE S. D. (2021)	ANDEAN ARC / NORTHERN ANDEAN VOLCANIC ZONE / ECUADOR / PULULAHUA / CASITAHUA VOLCANICS/	-78.48	0.044	48.73	VOLCANIC ROCK	DACITE			QUATERNARY		64.8492	0.960701	48.8298	39.6194	0.0318083	0.521199	17.1394	4.96141				4.9113	1.64378	0.0701614	1.01233	4.75093	0.140323	0.03		8.7		103	5		12	6					14.6	459	9.4	67	3.3		500	8
2021	[24426] ANDRADE S. D. (2021)	ANDEAN ARC / NORTHERN ANDEAN VOLCANIC ZONE / ECUADOR / PULULAHUA / CASITAHUA VOLCANICS/	-78.48	0.044	48.73	VOLCANIC ROCK	DACITE			QUATERNARY		64.9246	0.96122	52.5843	39.6641	0.0320513	0.512563	17.2462	4.78392				4.94472	1.58794	0.0703518	1.01508	4.77387	0.140704	0.25		8		96	7		10	6					15	468	8.9	73	3		473	8.2
2021	[24426] ANDRADE S. D. (2021)	ANDEAN ARC / NORTHERN ANDEAN VOLCANIC ZONE / ECUADOR / PULULAHUA / CASITAHUA VOLCANICS/	-78.48	0.044	48.73	VOLCANIC ROCK	DACITE			QUATERNARY		64.9311	0.963736	51.1236	38.9493	0.032967	0.522666	17.0369	5.08594				4.90502	1.63836	0.0703588	1.00513	4.66379	0.140718	0.21		8.2		105	7		11	6					15	455	8.9	73	3.3		500	8.2
2021	[24426] ANDRADE S. D. (2021)	ANDEAN ARC / NORTHERN ANDEAN VOLCANIC ZONE / ECUADOR / PULULAHUA / CASITAHUA VOLCANICS/	-78.48	0.044	48.73	VOLCANIC ROCK	DACITE			QUATERNARY		64.9324	0.968096	49.7778	39.6203	0.0379464	0.514217	17.0901	5.02117				4.94051	1.66364	0.0705787	1.03852	4.58762	0.141157	0.18		9.4		125	9		11	7					17	448	9	62	3.2		465	8
2021	[24426] ANDRADE S. D. (2021)	ANDEAN ARC / NORTHERN ANDEAN VOLCANIC ZONE / ECUADOR / PULULAHUA / CASITAHUA VOLCANICS/	-78.48	0.044	48.73	VOLCANIC ROCK	DACITE			QUATERNARY		63.1452	0.911996	41.1607	43.3334	0.0355748	0.541245	17.1394	5.63296				5.71314	2.175	0.0801844	0.972236	4.47028	0.1303	0.13		13.3		131	47		15	18					16.4	461	11.2	85	2.8		494	7.7
2009	[13717] CHIARADIA M.(2009) [GeoReM [4548] ]	ANDEAN ARC / NORTHERN ANDEAN VOLCANIC ZONE / ECUADOR / PULULAHUA//	-78.4606	0.0692	48.73	VOLCANIC ROCK	DACITE			QUATERNARY		65.37	0.956934	55.9302	43.6802	0.0372141	0.43	17.68	4.29				5.33	1.68	0.06	1.11	4.61	0.32	-0.09		10.4		60	19			6	21	46			17.9	481	8.6	94	2.6	0.36	597	6.7
2009	[13717] CHIARADIA M.(2009) [GeoReM [4548] ]	ANDEAN ARC / NORTHERN ANDEAN VOLCANIC ZONE / ECUADOR / PULULAHUA//	-78.466	0.035	48.73	VOLCANIC ROCK	DACITE			QUATERNARY		64.98	0.941988	57.381	43.8306	0.0369295	0.43	17.6	4.34				5.33	1.71	0.07	1.12	4.73	0.33	-0.11		10.7		65	18			6	20	49			17.8	482	8.4	94	2.8	0.32	587	6.5
2009	[13717] CHIARADIA M.(2009) [GeoReM [4548] ]	ANDEAN ARC / NORTHERN ANDEAN VOLCANIC ZONE / ECUADOR / PULULAHUA//	-78.466	0.035	48.73	VOLCANIC ROCK	DACITE			QUATERNARY		64.2	0.938327	56.3953	44.2556	0.0352577	0.45	17.69	4.64				5.51	1.86	0.07	1.08	4.66	0.32	-0.13		11.1		65	19			5	20	49			17.1	485	8.6	92	2.8	0.45	555	6.6
2012	[15840] HIDALGO S.(2012) [GeoReM [6536] ]	ANDEAN ARC / NORTHERN ANDEAN VOLCANIC ZONE / ECUADOR / ATACAZO-NINAHUILCA//	-78.619	-0.357	54.6	VOLCANIC ROCK	ANDESITE			QUATERNARY		60.31	0.881242	31.3433	39.374	0.0452381	0.6	16.79		6.51	11.719	5.86	6.03	4.27	0.09	1.06	4.22	0.12		10	18.2		147	137			43					19	420	13.4	89	2.5		455	8
2012	[15840] HIDALGO S.(2012) [GeoReM [6536] ]	ANDEAN ARC / NORTHERN ANDEAN VOLCANIC ZONE / ECUADOR / ATACAZO-NINAHUILCA//	-78.619	-0.357	54.6	VOLCANIC ROCK	ANDESITE			QUATERNARY		61.74	0.951108	28.5714	38.5433	0.0534211	0.62	16.69		6.27	11.283	5.64	5.39	3.97	0.09	1.14	3.96	0.13		13.1	17		155	160			55					20.3	380	13.3	102	3.3		730	10
2012	[15840] HIDALGO S.(2012) [GeoReM [6536] ]	ANDEAN ARC / NORTHERN ANDEAN VOLCANIC ZONE / ECUADOR / ATACAZO-NINAHUILCA//	-78.619	-0.357	54.6	VOLCANIC ROCK	ANDESITE			QUATERNARY		60.75	0.85987	29.7842	39.39	0.0410628	0.61	16.34		6.54	11.766	5.88	6.15	4.29	0.09	1.01	4.09	0.13		9.9	19		155	152			50					17	414	13.9	91	2.9		480	7.4
2012	[15840] HIDALGO S.(2012) [GeoReM [6536] ]	ANDEAN ARC / NORTHERN ANDEAN VOLCANIC ZONE / ECUADOR / ATACAZO-NINAHUILCA//	-78.619	-0.357	54.6	VOLCANIC ROCK	ANDESITE			QUATERNARY		61.02	0.904652	28.8406	36.9889	0.051005	0.67	16.64		6.58	11.842	5.92	5.65	3.9	0.09	1.12	4.2	0.14		10.6	16		150	124			51					20.3	398	13.8	106	3.4		502	10
2012	[15840] HIDALGO S.(2012) [GeoReM [6536] ]	ANDEAN ARC / NORTHERN ANDEAN VOLCANIC ZONE / ECUADOR / ATACAZO-NINAHUILCA//	-78.619	-0.357	54.6	VOLCANIC ROCK	ANDESITE			QUATERNARY		60.95	0.841456	34.6429	38.7085	0.0494845	0.7	15.84		6.74	12.136	6.07	6.18	4.3	0.08	1.19	3.83	0.18		6.9	16.3		165	184			63					24	485	14	105	4.3		553	11.2
2012	[15840] HIDALGO S.(2012) [GeoReM [6536] ]	ANDEAN ARC / NORTHERN ANDEAN VOLCANIC ZONE / ECUADOR / ATACAZO-NINAHUILCA//	-78.619	-0.357	54.6	VOLCANIC ROCK	ANDESITE			QUATERNARY		57.28	0.843637	32.7132	38.7629	0.0338863	0.67	16.5		8.48	15.262	7.63	7.12	5.42	0.12	0.76	3.52	0.14		11.4	22		189	238			62					14.3	422	12.9	66	2.4		355	6.7
2012	[15840] HIDALGO S.(2012) [GeoReM [6536] ]	ANDEAN ARC / NORTHERN ANDEAN VOLCANIC ZONE / ECUADOR / ATACAZO-NINAHUILCA//	-78.619	-0.357	54.6	VOLCANIC ROCK	ANDESITE			QUATERNARY		58.11	0.868827	18.4884	36.4242	0.0581761	0.65	16.55		8.4	15.12	7.56	6.88	4.86	0.13	0.89	3.39	0.12		12	28		197	135			34					18.5	318	17.2	81	2.5		400	6.2
2012	[15840] HIDALGO S.(2012) [GeoReM [6536] ]	ANDEAN ARC / NORTHERN ANDEAN VOLCANIC ZONE / ECUADOR / ATACAZO-NINAHUILCA//	-78.619	-0.357	54.6	VOLCANIC ROCK	ANDESITE			QUATERNARY		60.41	0.846832	34.7967	36.7796	0.0390187	0.65	16.09		7.2	12.96	6.48	6.54	4.23	0.1	0.93	3.71	0.14		10.3	16		170	179			45					16.7	428	12.3	82	3.2		475	7.8
2012	[15840] HIDALGO S.(2012) [GeoReM [6536] ]	ANDEAN ARC / NORTHERN ANDEAN VOLCANIC ZONE / ECUADOR / ATACAZO-NINAHUILCA//	-78.619	-0.357	54.6	VOLCANIC ROCK	ANDESITE			QUATERNARY		60.44	0.844027	35.8333	37.2155	0.0348837	0.64	16.12		7.1	12.78	6.39	6.6	4.25	0.1	0.89	3.73	0.14		9.5	15.8		168	182			45					15	430	12	81	2.9		470	7.7
2012	[15840] HIDALGO S.(2012) [GeoReM [6536] ]	ANDEAN ARC / NORTHERN ANDEAN VOLCANIC ZONE / ECUADOR / ATACAZO-NINAHUILCA//	-78.619	-0.357	54.6	VOLCANIC ROCK	ANDESITE			QUATERNARY		62.1	0.886023	37.1171	32.0232	0.0519417	0.63	16.03		6.94	12.486	6.24	5.65	3.3	0.09	1.13	4.01	0.14		15.3	14		150	136			32					21.4	412	11.1	95	3.3		550	8.6
2012	[15840] HIDALGO S.(2012) [GeoReM [6536] ]	ANDEAN ARC / NORTHERN ANDEAN VOLCANIC ZONE / ECUADOR / ATACAZO-NINAHUILCA//	-78.619	-0.357	54.6	VOLCANIC ROCK	ANDESITE			QUATERNARY		58.65	0.852627	23.2692	39.0345	0.046832	0.65	16.11		8.06	14.504	7.25	6.81	5.21	0.12	0.85	3.4	0.13		13.3	22.5		186	215			56					17	363	15.6	80	2.9		400	7.5
2012	[15840] HIDALGO S.(2012) [GeoReM [6536] ]	ANDEAN ARC / NORTHERN ANDEAN VOLCANIC ZONE / ECUADOR / ATACAZO-NINAHUILCA//	-78.619	-0.357	54.6	VOLCANIC ROCK	ANDESITE			QUATERNARY		59.29	0.87189	23.2484	37.0887	0.0482192	0.64	16.36		7.81	14.059	7.03	6.69	4.65	0.11	0.87	3.44	0.13		13.3	22		176	185			42					17.6	365	15.7	82	2.9		425	8.5
2012	[15840] HIDALGO S.(2012) [GeoReM [6536] ]	ANDEAN ARC / NORTHERN ANDEAN VOLCANIC ZONE / ECUADOR / ATACAZO-NINAHUILCA//	-78.619	-0.357	54.6	VOLCANIC ROCK	ANDESITE			QUATERNARY		59.87	0.881155	25.8993	38.5426	0.0458333	0.64	16.07		7.64	13.756	6.88	6.43	4.84	0.11	0.79	3.46	0.14		10.6	22.5		175	230			57					16.5	360	13.9	82	3.1		410	7
2012	[15840] HIDALGO S.(2012) [GeoReM [6536] ]	ANDEAN ARC / NORTHERN ANDEAN VOLCANIC ZONE / ECUADOR / ATACAZO-NINAHUILCA//	-78.619	-0.357	54.6	VOLCANIC ROCK	ANDESITE			QUATERNARY		60.19	0.863399	23.7838	32.8306	0.0590909	0.64	16.25		7.8	14.04	7.02	6.8	3.85	0.12	0.89	3.34	0.13		13	19		184	125			34					20.8	352	14.8	82	3		520	8.4
2012	[15840] HIDALGO S.(2012) [GeoReM [6536] ]	ANDEAN ARC / NORTHERN ANDEAN VOLCANIC ZONE / ECUADOR / ATACAZO-NINAHUILCA//	-78.619	-0.357	54.6	VOLCANIC ROCK	ANDESITE			QUATERNARY		60.53	0.859089	29.5556	35.6692	0.0526316	0.65	15.89		7.54	13.566	6.78	6.33	4.22	0.11	1.03	3.57	0.15		14.3	18.4		171	160			46					21	399	13.5	90	3.5		493	9.6
2012	[15840] HIDALGO S.(2012) [GeoReM [6536] ]	ANDEAN ARC / NORTHERN ANDEAN VOLCANIC ZONE / ECUADOR / ATACAZO-NINAHUILCA//	-78.619	-0.357	54.6	VOLCANIC ROCK	ANDESITE			QUATERNARY		60.56	0.872575	27.5781	36.4162	0.0660057	0.6	15.94		7.52	13.538	6.77	6.34	4.35	0.11	1.03	3.42	0.13		15.4	17.5		167	178			45					23.3	353	12.8	85	3.6		550	7.7
2012	[15840] HIDALGO S.(2012) [GeoReM [6536] ]	ANDEAN ARC / NORTHERN ANDEAN VOLCANIC ZONE / ECUADOR / ATACAZO-NINAHUILCA//	-78.619	-0.357	54.6	VOLCANIC ROCK	ANDESITE			QUATERNARY		60.67	0.897602	32.1875	34.77	0.0558252	0.6	16.52		7.19	12.941	6.47	6.09	3.87	0.1	1.09	3.74	0.13		16	15.6		160	130			37					23	412	12.8	84	3.1		512	8.8
2012	[15840] HIDALGO S.(2012) [GeoReM [6536] ]	ANDEAN ARC / NORTHERN ANDEAN VOLCANIC ZONE / ECUADOR / ATACAZO-NINAHUILCA//	-78.619	-0.357	54.6	VOLCANIC ROCK	ANDESITE			QUATERNARY		60.72	0.856194	25.8974	34.6373	0.0586634	0.66	16.11		7.23	13.017	6.51	6.44	3.87	0.11	1.11	3.59	0.15		12.4	17		172	162			43					23.7	404	15.6	92	4		615	10.5
2012	[15840] HIDALGO S.(2012) [GeoReM [6536] ]	ANDEAN ARC / NORTHERN ANDEAN VOLCANIC ZONE / ECUADOR / ATACAZO-NINAHUILCA//	-78.619	-0.357	54.6	VOLCANIC ROCK	ANDESITE			QUATERNARY		60.73	0.905074	25.4667	37.3443	0.0536649	0.61	16.75		6.68	12.022	6.01	5.95	4.02	0.09	1.07	3.97	0.13			19		157	132			29					20.5	382	15	96	2.9		532	9
2012	[15840] HIDALGO S.(2012) [GeoReM [6536] ]	ANDEAN ARC / NORTHERN ANDEAN VOLCANIC ZONE / ECUADOR / ATACAZO-NINAHUILCA//	-78.619	-0.357	54.6	VOLCANIC ROCK	ANDESITE			QUATERNARY		60.75	0.85804	26.5672	35.9441	0.0646067	0.61	15.79		7.5	13.5	6.75	6.39	4.25	0.11	1.04	3.44	0.13		16.4	18		175	184			47					23	356	13.4	89	3.4		535	8
2012	[15840] HIDALGO S.(2012) [GeoReM [6536] ]	ANDEAN ARC / NORTHERN ANDEAN VOLCANIC ZONE / ECUADOR / ATACAZO-NINAHUILCA//	-78.619	-0.357	54.6	VOLCANIC ROCK	ANDESITE			QUATERNARY		60.98	0.908037	24.1379	37.4214	0.0568571	0.63	15.85		7.47	13.443	6.72	5.82	4.51	0.11	0.94	3.56	0.13		13.4	21		165	195			52					19.9	350	14.5	86	3.2		450	7.9
2012	[15840] HIDALGO S.(2012) [GeoReM [6536] ]	ANDEAN ARC / NORTHERN ANDEAN VOLCANIC ZONE / ECUADOR / ATACAZO-NINAHUILCA//	-78.619	-0.357	54.6	VOLCANIC ROCK	ANDESITE			QUATERNARY		61.65	0.901049	25.7333	31.1559	0.0554404	0.6	16.45		7.09	12.761	6.38	6.43	3.24	0.09	0.99	3.34	0.13		10.5	19		170	95			23					21.4	386	15	79	3.3		980	9
2012	[15840] HIDALGO S.(2012) [GeoReM [6536] ]	ANDEAN ARC / NORTHERN ANDEAN VOLCANIC ZONE / ECUADOR / ATACAZO-NINAHUILCA//	-78.619	-0.357	54.6	VOLCANIC ROCK	ANDESITE			QUATERNARY		62.11	0.888319	29.2373	32.5395	0.0797101	0.57	15.96		7.02	12.638	6.32	5.91	3.42	0.1	1.17	3.62	0.12		17.5	16		154	114			33					27.5	345	11.8	89	3.3		578	8
2012	[15840] HIDALGO S.(2012) [GeoReM [6536] ]	ANDEAN ARC / NORTHERN ANDEAN VOLCANIC ZONE / ECUADOR / ATACAZO-NINAHUILCA//	-78.619	-0.357	54.6	VOLCANIC ROCK	ANDESITE			QUATERNARY		60.68	0.892285	34.8361	29.3754	0.0517647	0.67	16.55		7.64	13.756	6.88	6.22	3.21	0.1	1.08	3.69	0.15		12.7	13.5		192	54			22					22	425	12.2	83	3.7		540	9.8
2012	[15840] HIDALGO S.(2012) [GeoReM [6536] ]	ANDEAN ARC / NORTHERN ANDEAN VOLCANIC ZONE / ECUADOR / ATACAZO-NINAHUILCA//	-78.619	-0.357	54.6	VOLCANIC ROCK	ANDESITE			QUATERNARY		61.91	0.863666	35.3636	34.8653	0.059126	0.58	15.83		6.86	12.354	6.18	6.16	3.71	0.09	1.1	3.61	0.15		13.8	16		154	146			40					23	389	11	88	2.7		558	8.4
2012	[15840] HIDALGO S.(2012) [GeoReM [6536] ]	ANDEAN ARC / NORTHERN ANDEAN VOLCANIC ZONE / ECUADOR / ATACAZO-NINAHUILCA//	-78.619	-0.357	54.6	VOLCANIC ROCK	ANDESITE			QUATERNARY		60.07	0.850161	34.1026	35.0935	0.0418546	0.69	16.02		7.71	13.879	6.94	6.61	4.21	0.1	0.85	3.59	0.15		10.9	16.6		176	168			43					16.7	399	11.7	79	3.3		385	8
2012	[15840] HIDALGO S.(2012) [GeoReM [6536] ]	ANDEAN ARC / NORTHERN ANDEAN VOLCANIC ZONE / ECUADOR / ATACAZO-NINAHUILCA//	-78.619	-0.357	54.6	VOLCANIC ROCK	ANDESITE			QUATERNARY		61.71	0.860565	35.1818	33.4591	0.0516796	0.63	15.81		7.17	12.903	6.45	6.26	3.64	0.1	0.85	3.69	0.15		8.4	15.3		158	139			37					20	387	11	88	3.4		460	8.8
2012	[15840] HIDALGO S.(2012) [GeoReM [6536] ]	ANDEAN ARC / NORTHERN ANDEAN VOLCANIC ZONE / ECUADOR / ATACAZO-NINAHUILCA//	-78.619	-0.357	54.6	VOLCANIC ROCK	ANDESITE			QUATERNARY		61.71	0.8842	34.5133	35.1066	0.0597436	0.6	15.93		7.01	12.619	6.31	6.03	3.83	0.1	1.06	3.59	0.14		13.1	16		158	150			39					23.3	390	11.3	83	3.3		533	8
2012	[15840] HIDALGO S.(2012) [GeoReM [6536] ]	ANDEAN ARC / NORTHERN ANDEAN VOLCANIC ZONE / ECUADOR / ATACAZO-NINAHUILCA//	-78.619	-0.357	54.6	VOLCANIC ROCK	ANDESITE			QUATERNARY		62.3	0.920825	33.9167	31.5728	0.0565111	0.63	16.21		6.91	12.439	6.22	5.52	3.22	0.08	1.11	3.87	0.14		18.8	14.2		150	132			32					23	407	12	95	3.4		540	10.5
2012	[15840] HIDALGO S.(2012) [GeoReM [6536] ]	ANDEAN ARC / NORTHERN ANDEAN VOLCANIC ZONE / ECUADOR / ATACAZO-NINAHUILCA//	-78.619	-0.357	54.6	VOLCANIC ROCK	ANDESITE			QUATERNARY		62.16	0.879906	33.4426	33.282	0.0541667	0.63	15.89		6.87	12.363	6.18	5.71	3.46	0.09	1.12	3.93	0.14		15.2	14.4		148	126			31					22.1	408	12.2	96	3.5		545	9.5
2012	[15840] HIDALGO S.(2012) [GeoReM [6536] ]	ANDEAN ARC / NORTHERN ANDEAN VOLCANIC ZONE / ECUADOR / ATACAZO-NINAHUILCA//	-78.619	-0.357	54.6	VOLCANIC ROCK	DACITE			QUATERNARY		63.21	0.938214	30.6897	31.2287	0.0724719	0.57	16.27		6.39	11.501	5.75	5.61	2.93	0.09	1.37	3.44	0.13		11.3	13.5		143	82			18					25.8	356	11.6	88	3.4		342	9.2
2012	[15840] HIDALGO S.(2012) [GeoReM [6536] ]	ANDEAN ARC / NORTHERN ANDEAN VOLCANIC ZONE / ECUADOR / ATACAZO-NINAHUILCA//	-78.619	-0.357	54.6	VOLCANIC ROCK	ANDESITE			QUATERNARY		62.98	0.921524	34.3478	31.9897	0.0458228	0.56	16.32		6.4	11.52	5.76	5.77	3.04	0.09	0.94	3.77	0.13		10	13.5		138	84			24					18.1	395	11.5	88	3.3		545	9.9
2012	[15840] HIDALGO S.(2012) [GeoReM [6536] ]	ANDEAN ARC / NORTHERN ANDEAN VOLCANIC ZONE / ECUADOR / ATACAZO-NINAHUILCA//	-78.619	-0.357	54.6	VOLCANIC ROCK	ANDESITE			QUATERNARY		61.83	0.886045	33.5965	35.047	0.0616188	0.59	15.88		7.01	12.619	6.31	6.03	3.82	0.1	1.11	3.5	0.12		10.1	17		156	132			32					23.6	383	11.4	79	3.1		565	7.9
2012	[15840] HIDALGO S.(2012) [GeoReM [6536] ]	ANDEAN ARC / NORTHERN ANDEAN VOLCANIC ZONE / ECUADOR / ATACAZO-NINAHUILCA//	-78.619	-0.357	54.6	VOLCANIC ROCK	ANDESITE			QUATERNARY		62.04	0.911474	33.8393	34.0449	0.0614776	0.61	15.94		7.08	12.742	6.37	5.77	3.69	0.1	1.1	3.53	0.14		13.7	16.5		159	150			38					23.3	379	11.2	86	3.4		555	7.2
2012	[15840] HIDALGO S.(2012) [GeoReM [6536] ]	ANDEAN ARC / NORTHERN ANDEAN VOLCANIC ZONE / ECUADOR / ATACAZO-NINAHUILCA//	-78.619	-0.357	54.6	VOLCANIC ROCK	ANDESITE			QUATERNARY		60.79	0.883157	28.1818	32.5069	0.0583333	0.66	16.3		7.46	13.434	6.72	6.32	3.63	0.1	1.01	3.57	0.15		15.6	17		180	127			30					21.7	372	13.2	92	3.5		585	8.8
2012	[15840] HIDALGO S.(2012) [GeoReM [6536] ]	ANDEAN ARC / NORTHERN ANDEAN VOLCANIC ZONE / ECUADOR / ATACAZO-NINAHUILCA//	-78.619	-0.357	54.6	VOLCANIC ROCK	ANDESITE			QUATERNARY		60.83	0.862753	20.2857	33.1092	0.0664789	0.63	16.14		7.44	13.396	6.7	6.69	3.72	0.1	0.97	3.34	0.14		16.6	20		178	120			28					23.6	355	17.5	90	3.5		550	9.7
2012	[15840] HIDALGO S.(2012) [GeoReM [6536] ]	ANDEAN ARC / NORTHERN ANDEAN VOLCANIC ZONE / ECUADOR / ATACAZO-NINAHUILCA//	-78.619	-0.357	54.6	VOLCANIC ROCK	ANDESITE			QUATERNARY		61.71	0.885938	34.5833	32.8458	0.06	0.61	16.28		6.86	12.354	6.18	6.31	3.39	0.1	1.15	3.44	0.15		12.6	17		165	122			27					24.9	415	12	94	3.8		650	10.1
2012	[15840] HIDALGO S.(2012) [GeoReM [6536] ]	ANDEAN ARC / NORTHERN ANDEAN VOLCANIC ZONE / ECUADOR / ATACAZO-NINAHUILCA//	-78.619	-0.357	54.6	VOLCANIC ROCK	ANDESITE			QUATERNARY		61.49	0.867302	34.9107	35.2152	0.0524297	0.58	15.9		7.07	12.723	6.36	6.27	3.88	0.1	1.01	3.55	0.14		13.4	18		164	150			42					20.5	391	11.2	81	3		600	7.7
2012	[15840] HIDALGO S.(2012) [GeoReM [6536] ]	ANDEAN ARC / NORTHERN ANDEAN VOLCANIC ZONE / ECUADOR / ATACAZO-NINAHUILCA//	-78.619	-0.357	54.6	VOLCANIC ROCK	ANDESITE			QUATERNARY		60.89	0.883055	33.8393	35.2232	0.0569921	0.61	15.93		7.52	13.538	6.77	6.1	4.13	0.1	1.04	3.54	0.14		13.3	18		175	170			46					21.6	379	11.2	80	3.2		510	7.2
2012	[15840] HIDALGO S.(2012) [GeoReM [6536] ]	ANDEAN ARC / NORTHERN ANDEAN VOLCANIC ZONE / ECUADOR / ATACAZO-NINAHUILCA//	-78.619	-0.357	54.6	VOLCANIC ROCK	ANDESITE			QUATERNARY		57.94	0.871376	45.4688	32.677	0.040378	0.9	16.98		8.24	14.836	7.42	6.39	4.04	0.11	1.16	4.02	0.22			15		190	96			36					23.5	582	12.8	115	6		556	13.8
2012	[15840] HIDALGO S.(2012) [GeoReM [6536] ]	ANDEAN ARC / NORTHERN ANDEAN VOLCANIC ZONE / ECUADOR / ATACAZO-NINAHUILCA//	-78.619	-0.357	54.6	VOLCANIC ROCK	ANDESITE			QUATERNARY		58.3	0.853971	42.6667	32.5562	0.0390625	0.89	16.68		8.23	14.807	7.4	6.59	4.01	0.11	1.14	3.84	0.22		10.3	15		188	100			36					22.5	576	13.5	109	5.9		570	15
2012	[15840] HIDALGO S.(2012) [GeoReM [6536] ]	ANDEAN ARC / NORTHERN ANDEAN VOLCANIC ZONE / ECUADOR / ATACAZO-NINAHUILCA//	-78.619	-0.357	54.6	VOLCANIC ROCK	ANDESITE			QUATERNARY		58.19	0.862602	42.7407	32.6337	0.0395147	0.9	16.75		8.28	14.902	7.45	6.5	4.05	0.11	1.14	3.87	0.22		13.7	15		187	98			35					22.8	577	13.5	108	5.9		555	14.5
2012	[15840] HIDALGO S.(2012) [GeoReM [6536] ]	ANDEAN ARC / NORTHERN ANDEAN VOLCANIC ZONE / ECUADOR / ATACAZO-NINAHUILCA//	-78.619	-0.357	54.6	VOLCANIC ROCK	DACITE			QUATERNARY		66.18	0.990308	50.6757	23.4546	0.0584	0.59	16.22		5.3	9.54	4.77	4.43	1.64	0.06	1.11	4.33	0.13		17.2	7.1		112	24			11					21.9	375	7.4	67	3.3		583	8.8
2012	[15840] HIDALGO S.(2012) [GeoReM [6536] ]	ANDEAN ARC / NORTHERN ANDEAN VOLCANIC ZONE / ECUADOR / ATACAZO-NINAHUILCA//	-78.619	-0.357	54.6	VOLCANIC ROCK	DACITE			QUATERNARY		66.75	0.972223	55.0725	23.1878	0.0565789	0.58	15.96		5.08	9.152	4.58	4.33	1.55	0.05	1.13	4.45	0.12		17.6	6.5		106	21			9					21.5	380	6.9	53	3.3		545	8.7
2012	[15840] HIDALGO S.(2012) [GeoReM [6536] ]	ANDEAN ARC / NORTHERN ANDEAN VOLCANIC ZONE / ECUADOR / ATACAZO-NINAHUILCA//	-78.619	-0.357	54.6	VOLCANIC ROCK	DACITE			QUATERNARY		66.48	0.952009	55	21.9097	0.0469697	0.63	15.8		5.4	9.72	4.86	4.54	1.53	0.05	1.02	4.4	0.14		15.2	6		113	18			8					18.6	396	7.2	68	3.4		498	8.8
2012	[15840] HIDALGO S.(2012) [GeoReM [6536] ]	ANDEAN ARC / NORTHERN ANDEAN VOLCANIC ZONE / ECUADOR / ATACAZO-NINAHUILCA//	-78.619	-0.357	54.6	VOLCANIC ROCK	DACITE			QUATERNARY		66.49	0.929703	57.4286	22.2503	0.0472637	0.63	15.66		5.36	9.654	4.83	4.64	1.55	0.06	1.02	4.44	0.14		15.7	6.2		112	20			7.5					19	402	7	68	3.3		520	8.8
2012	[15840] HIDALGO S.(2012) [GeoReM [6536] ]	ANDEAN ARC / NORTHERN ANDEAN VOLCANIC ZONE / ECUADOR / ATACAZO-NINAHUILCA//	-78.619	-0.357	54.6	VOLCANIC ROCK	DACITE			QUATERNARY		66.55	0.948075	58.2609	21.7855	0.0462687	0.62	15.88		5.23	9.407	4.7	4.54	1.47	0.05	1.04	4.48	0.14		12.9	5.8		110	19			8					18.6	402	6.9	67	3.3		554	9
2012	[15840] HIDALGO S.(2012) [GeoReM [6536] ]	ANDEAN ARC / NORTHERN ANDEAN VOLCANIC ZONE / ECUADOR / ATACAZO-NINAHUILCA//	-78.619	-0.357	54.6	VOLCANIC ROCK	DACITE			QUATERNARY		67.04	0.922939	59.5522	22.5951	0.0466165	0.58	15.61		4.95	8.915	4.46	4.6	1.46	0.05	1.06	4.5	0.14		12.4	5.6		105	18			8					18.6	399	6.7	65	2.9		560	9
2012	[15840] HIDALGO S.(2012) [GeoReM [6536] ]	ANDEAN ARC / NORTHERN ANDEAN VOLCANIC ZONE / ECUADOR / ATACAZO-NINAHUILCA//	-78.619	-0.357	54.6	VOLCANIC ROCK	DACITE			QUATERNARY		66.75	0.95518	59.7015	22.0458	0.0475	0.61	15.87		5.15	9.265	4.63	4.55	1.47	0.05	1.02	4.4	0.13		15.4	5.6		105	19			8					19	400	6.7	65	3.3		519	9
2012	[15840] HIDALGO S.(2012) [GeoReM [6536] ]	ANDEAN ARC / NORTHERN ANDEAN VOLCANIC ZONE / ECUADOR / ATACAZO-NINAHUILCA//	-78.619	-0.357	54.6	VOLCANIC ROCK	DACITE			QUATERNARY		66.69	0.954628	58.5294	22.3295	0.0477387	0.6	15.96		5.06	9.114	4.56	4.58	1.47	0.05	1.02	4.43	0.13		15.8	5.6		103	17			6.7					19	398	6.8	64	3.2		525	9
2012	[15840] HIDALGO S.(2012) [GeoReM [6536] ]	ANDEAN ARC / NORTHERN ANDEAN VOLCANIC ZONE / ECUADOR / ATACAZO-NINAHUILCA//	-78.619	-0.357	54.6	VOLCANIC ROCK	ANDESITE			QUATERNARY		62.7	0.926346	45.2577	26.6372	0.0396355	0.64	16.95		6.3	11.34	5.67	5.72	2.31	0.08	1.02	4.13	0.14		7.5	9.5		135	32			11					17.4	439	9.7	75	3.6		540	9.5
2012	[15840] HIDALGO S.(2012) [GeoReM [6536] ]	ANDEAN ARC / NORTHERN ANDEAN VOLCANIC ZONE / ECUADOR / ATACAZO-NINAHUILCA//	-78.619	-0.357	54.6	VOLCANIC ROCK	ANDESITE			QUATERNARY		61.67	0.909123	40.0935	29.2304	0.0405594	0.57	17.15		6.52	11.738	5.87	6.17	2.72	0.09	0.97	4.01	0.14		11.6	12.5		147	41			15.5					17.4	429	10.7	77	3.1		526	7.8
2012	[15840] HIDALGO S.(2012) [GeoReM [6536] ]	ANDEAN ARC / NORTHERN ANDEAN VOLCANIC ZONE / ECUADOR / ATACAZO-NINAHUILCA//	-78.619	-0.357	54.6	VOLCANIC ROCK	DACITE			QUATERNARY		63.33	0.91119	49.3258	26.8255	0.0428246	0.62	16.58		6.13	11.037	5.52	5.61	2.27	0.08	1.05	4.17	0.15		12.8	9.5		132	42			13					18.8	439	8.9	75	3.5		540	9
2012	[15840] HIDALGO S.(2012) [GeoReM [6536] ]	ANDEAN ARC / NORTHERN ANDEAN VOLCANIC ZONE / ECUADOR / ATACAZO-NINAHUILCA//	-78.619	-0.357	54.6	VOLCANIC ROCK	DACITE			QUATERNARY		63.87	0.910023	48.8636	25.6824	0.047907	0.64	16.27		6.19	11.141	5.57	5.49	2.16	0.08	1.08	4.09	0.15		13.4	8.7		138	37			11					20.6	430	8.8	68	3.9		572	9
2012	[15840] HIDALGO S.(2012) [GeoReM [6536] ]	ANDEAN ARC / NORTHERN ANDEAN VOLCANIC ZONE / ECUADOR / ATACAZO-NINAHUILCA//	-78.619	-0.357	54.6	VOLCANIC ROCK	DACITE			QUATERNARY		63	0.914533	36.7619	27.881	0.0533679	0.62	16.41		6.53	11.757	5.88	5.67	2.55	0.08	1.02	3.97	0.14		15.7	11.7		148	60			16.5					20.6	386	10.5	86	3.3		515	8.1
2012	[15840] HIDALGO S.(2012) [GeoReM [6536] ]	ANDEAN ARC / NORTHERN ANDEAN VOLCANIC ZONE / ECUADOR / ATACAZO-NINAHUILCA//	-78.619	-0.357	54.6	VOLCANIC ROCK	DACITE			QUATERNARY		63.74	0.994852	56	22.3961	0.0401786	0.69	17.07		6.21	11.179	5.59	5.28	1.81	0.07	0.98	3.95	0.19		15.1	7		128	16			5					18	448	8	95	4.4		535	9.8
2012	[15840] HIDALGO S.(2012) [GeoReM [6536] ]	ANDEAN ARC / NORTHERN ANDEAN VOLCANIC ZONE / ECUADOR / ATACAZO-NINAHUILCA//	-78.619	-0.357	54.6	VOLCANIC ROCK	DACITE			QUATERNARY		63.91	0.969767	56.875	22.7014	0.0421978	0.68	16.86		6.14	11.046	5.52	5.17	1.82	0.07	1.01	4.19	0.16		15	7		125	14			4					19.2	455	8	88	4.1		550	9
2012	[15840] HIDALGO S.(2012) [GeoReM [6536] ]	ANDEAN ARC / NORTHERN ANDEAN VOLCANIC ZONE / ECUADOR / ATACAZO-NINAHUILCA//	-78.619	-0.357	54.6	VOLCANIC ROCK	DACITE			QUATERNARY		64.17	0.991584	58.9474	23.0455	0.0433036	0.66	17.05		5.85	10.535	5.27	5.05	1.77	0.07	1.02	4.2	0.16		15.4	6.5		118	13			6					19.4	448	7.6	89	4.3		540	9.5
2012	[15840] HIDALGO S.(2012) [GeoReM [6536] ]	ANDEAN ARC / NORTHERN ANDEAN VOLCANIC ZONE / ECUADOR / ATACAZO-NINAHUILCA//	-78.619	-0.357	54.6	VOLCANIC ROCK	DACITE			QUATERNARY		64.36	0.96464	60.5405	22.9301	0.0430804	0.67	16.76		5.86	10.544	5.27	5.14	1.76	0.06	1.05	4.19	0.15		15.1	6.5		120	13			5					19.3	448	7.4	92	4.3		550	9.1
2012	[15840] HIDALGO S.(2012) [GeoReM [6536] ]	ANDEAN ARC / NORTHERN ANDEAN VOLCANIC ZONE / ECUADOR / ATACAZO-NINAHUILCA//	-78.619	-0.357	54.6	VOLCANIC ROCK	DACITE			QUATERNARY		64.56	0.933499	57.25	23.5402	0.0421397	0.65	16.44		5.79	10.421	5.21	5.21	1.8	0.07	1.06	4.25	0.16		14.75	7		120	14			6					19.3	458	8	91	4.5		570	9.8
2012	[15840] HIDALGO S.(2012) [GeoReM [6536] ]	ANDEAN ARC / NORTHERN ANDEAN VOLCANIC ZONE / ECUADOR / ATACAZO-NINAHUILCA//	-78.619	-0.357	54.6	VOLCANIC ROCK	DACITE			QUATERNARY		65.72	0.948965	57.013	24.2975	0.0487472	0.61	16.15		5.37	9.663	4.83	4.93	1.74	0.06	1.15	4.14	0.13		11	6.7		110	14			5					21.4	439	7.7	68	4.3		630	9.5
2012	[15840] HIDALGO S.(2012) [GeoReM [6536] ]	ANDEAN ARC / NORTHERN ANDEAN VOLCANIC ZONE / ECUADOR / ATACAZO-NINAHUILCA//	-78.619	-0.357	54.6	VOLCANIC ROCK	DACITE			QUATERNARY		65.7	0.958364	61.3514	23.4824	0.0455947	0.6	16.4		5.19	9.351	4.68	4.84	1.61	0.06	1.16	4.29	0.15		11.9	6		100	11			5					20.7	454	7.4	63	4.2		590	9.9
2012	[15840] HIDALGO S.(2012) [GeoReM [6536] ]	ANDEAN ARC / NORTHERN ANDEAN VOLCANIC ZONE / ECUADOR / ATACAZO-NINAHUILCA//	-78.619	-0.357	54.6	VOLCANIC ROCK	DACITE			QUATERNARY		65.88	0.932842	61.3514	23.142	0.0473568	0.6	16.17		5.16	9.294	4.65	4.98	1.57	0.06	1.16	4.27	0.15		12.3	6		105	12			5.5					21.5	454	7.4	68	4.5		620	10.2
2012	[15840] HIDALGO S.(2012) [GeoReM [6536] ]	ANDEAN ARC / NORTHERN ANDEAN VOLCANIC ZONE / ECUADOR / ATACAZO-NINAHUILCA//	-78.619	-0.357	54.6	VOLCANIC ROCK	DACITE			QUATERNARY		65.28	0.93066	57.9487	23.087	0.0457965	0.63	16.22		5.54	9.976	4.99	5.08	1.68	0.06	1.14	4.23	0.13		11.8	6.5		114	13			5					20.7	452	7.8	92	4.3		590	10.2
2012	[15840] HIDALGO S.(2012) [GeoReM [6536] ]	ANDEAN ARC / NORTHERN ANDEAN VOLCANIC ZONE / ECUADOR / ATACAZO-NINAHUILCA//	-78.619	-0.357	54.6	VOLCANIC ROCK	DACITE			QUATERNARY		65.68	0.93949	57.6623	23.0487	0.0477477	0.62	16.04		5.52	9.938	4.97	4.96	1.67	0.06	1.15	4.14	0.14		15.2	6.5		115	15			5					21.2	444	7.7	71	4.4		610	10
2012	[15840] HIDALGO S.(2012) [GeoReM [6536] ]	ANDEAN ARC / NORTHERN ANDEAN VOLCANIC ZONE / ECUADOR / ATACAZO-NINAHUILCA//	-78.619	-0.357	54.6	VOLCANIC ROCK	DACITE			QUATERNARY		64.3	0.988124	58.2667	24.2755	0.0508009	0.56	17.1		5.65	10.175	5.09	5.22	1.83	0.07	1.08	4.04	0.13		16.3	6.5		115	12			5					22.2	437	7.5	73	3.2		570	8
2012	[15840] HIDALGO S.(2012) [GeoReM [6536] ]	ANDEAN ARC / NORTHERN ANDEAN VOLCANIC ZONE / ECUADOR / ATACAZO-NINAHUILCA//	-78.619	-0.357	54.6	VOLCANIC ROCK	DACITE			QUATERNARY		64.63	0.98496	60.5405	23.9418	0.0484375	0.55	17.07		5.44	9.796	4.9	5.05	1.73	0.07	1.1	4.23	0.12		15.6	6.1		108	12			5					21.7	448	7.4	74	3		585	8
2012	[15840] HIDALGO S.(2012) [GeoReM [6536] ]	ANDEAN ARC / NORTHERN ANDEAN VOLCANIC ZONE / ECUADOR / ATACAZO-NINAHUILCA//	-78.619	-0.357	54.6	VOLCANIC ROCK	DACITE			QUATERNARY		64.65	0.984581	58.2895	23.9245	0.0485327	0.54	17.06		5.48	9.862	4.93	5.28	1.74	0.06	1.06	4	0.14		16.2	7		110	12			5					21.5	443	7.6	80	3.3		635	7.9
2012	[15840] HIDALGO S.(2012) [GeoReM [6536] ]	ANDEAN ARC / NORTHERN ANDEAN VOLCANIC ZONE / ECUADOR / ATACAZO-NINAHUILCA//	-78.619	-0.357	54.6	VOLCANIC ROCK	DACITE			QUATERNARY		64.65	0.990505	61.25	23.2878	0.0521542	0.56	16.98		5.61	10.099	5.05	5.01	1.72	0.06	1.1	4.16	0.13		16	6.2		119	14			5					23	441	7.2	76	3.4		610	7.7
2012	[15840] HIDALGO S.(2012) [GeoReM [6536] ]	ANDEAN ARC / NORTHERN ANDEAN VOLCANIC ZONE / ECUADOR / ATACAZO-NINAHUILCA//	-78.619	-0.357	54.6	VOLCANIC ROCK	DACITE			QUATERNARY		64.72	0.994102	59.4595	23.7656	0.0490909	0.55	17.12		5.4	9.72	4.86	4.99	1.7	0.06	1.1	4.23	0.12		16.2	6.5		110	11			5					21.6	440	7.4	74	3		575	8
2012	[15840] HIDALGO S.(2012) [GeoReM [6536] ]	ANDEAN ARC / NORTHERN ANDEAN VOLCANIC ZONE / ECUADOR / ATACAZO-NINAHUILCA//	-78.619	-0.357	54.6	VOLCANIC ROCK	DACITE			QUATERNARY		64.74	0.990718	59.726	24.0839	0.0504587	0.55	17.06		5.4	9.72	4.86	4.95	1.73	0.06	1.12	4.26	0.12		16.5	6.5		105	11			5					22	436	7.3	76	3.2		570	7.8
2012	[15840] HIDALGO S.(2012) [GeoReM [6536] ]	ANDEAN ARC / NORTHERN ANDEAN VOLCANIC ZONE / ECUADOR / ATACAZO-NINAHUILCA//	-78.619	-0.357	54.6	VOLCANIC ROCK	DACITE			QUATERNARY		64.75	0.985109	57.0667	24.3436	0.0523364	0.55	16.96		5.45	9.805	4.9	5.09	1.77	0.07	1.14	4.09	0.13		16.4	6.5		108	11			5					22.4	428	7.5	76	3.1		580	8.1
2012	[15840] HIDALGO S.(2012) [GeoReM [6536] ]	ANDEAN ARC / NORTHERN ANDEAN VOLCANIC ZONE / ECUADOR / ATACAZO-NINAHUILCA//	-78.619	-0.357	54.6	VOLCANIC ROCK	DACITE			QUATERNARY		64.77	0.991198	59.8649	23.979	0.0525959	0.54	17.07		5.37	9.663	4.83	4.93	1.71	0.06	1.14	4.27	0.14		16.8	6.1		110	12.5			5.5					23.3	443	7.4	76	3.4		615	8
2012	[15840] HIDALGO S.(2012) [GeoReM [6536] ]	ANDEAN ARC / NORTHERN ANDEAN VOLCANIC ZONE / ECUADOR / ATACAZO-NINAHUILCA//	-78.619	-0.357	54.6	VOLCANIC ROCK	DACITE			QUATERNARY		64.83	0.994507	61.1111	23.5884	0.0495455	0.55	17.04		5.42	9.758	4.88	4.96	1.69	0.06	1.1	4.21	0.13		16.7	6.5		114	13			8					21.8	440	7.2	76	3.4		620	8
2012	[15840] HIDALGO S.(2012) [GeoReM [6536] ]	ANDEAN ARC / NORTHERN ANDEAN VOLCANIC ZONE / ECUADOR / ATACAZO-NINAHUILCA//	-78.619	-0.357	54.6	VOLCANIC ROCK	DACITE			QUATERNARY		64.77	0.983888	60.8219	23.9263	0.0477477	0.53	17.12		5.29	9.521	4.76	5.07	1.68	0.06	1.07	4.27	0.13		16.2	6.5		110	12			6					21.2	444	7.3	76	3.3		606	8.2
2012	[15840] HIDALGO S.(2012) [GeoReM [6536] ]	ANDEAN ARC / NORTHERN ANDEAN VOLCANIC ZONE / ECUADOR / ATACAZO-NINAHUILCA//	-78.619	-0.357	54.6	VOLCANIC ROCK	DACITE			QUATERNARY		64.9	0.982835	63.5714	22.9825	0.0525843	0.55	16.94		5.44	9.796	4.9	4.98	1.64	0.06	1.13	4.23	0.12		16.3	6		110	11.5			5					23.4	445	7	74	3.1		612	8.1
2012	[15840] HIDALGO S.(2012) [GeoReM [6536] ]	ANDEAN ARC / NORTHERN ANDEAN VOLCANIC ZONE / ECUADOR / ATACAZO-NINAHUILCA//	-78.619	-0.357	54.6	VOLCANIC ROCK	DACITE			QUATERNARY		65.11	0.985734	60.411	23.8178	0.0521542	0.54	16.92		5.26	9.464	4.73	4.92	1.66	0.06	1.15	4.24	0.13		16.5	6.3		107	12			5					23	441	7.3	76	3.3		620	7.6
2012	[15840] HIDALGO S.(2012) [GeoReM [6536] ]	ANDEAN ARC / NORTHERN ANDEAN VOLCANIC ZONE / ECUADOR / ATACAZO-NINAHUILCA//	-78.619	-0.357	54.6	VOLCANIC ROCK	DACITE			QUATERNARY		65.12	0.982429	59.4595	25.2531	0.0504545	0.54	16.97		5.1	9.18	4.59	5.1	1.74	0.06	1.1	4.14	0.13		16.4	6		110	12			5					22.2	440	7.4	72	3.1		600	7.9
2012	[15840] HIDALGO S.(2012) [GeoReM [6536] ]	ANDEAN ARC / NORTHERN ANDEAN VOLCANIC ZONE / ECUADOR / ATACAZO-NINAHUILCA//	-78.619	-0.357	54.6	VOLCANIC ROCK	DACITE			QUATERNARY		65.18	0.960961	61.9718	24.2254	0.05	0.54	16.6		5.39	9.701	4.85	5.01	1.74	0.07	1.1	4.24	0.12		15.7	6		108	12			5					22	440	7.1	74	3.2		600	7.9
2012	[15840] HIDALGO S.(2012) [GeoReM [6536] ]	ANDEAN ARC / NORTHERN ANDEAN VOLCANIC ZONE / ECUADOR / ATACAZO-NINAHUILCA//	-78.619	-0.357	54.6	VOLCANIC ROCK	DACITE			QUATERNARY		65.2	0.950747	59.5946	23.3954	0.0505669	0.54	16.51		5.45	9.805	4.9	5	1.68	0.07	1.14	4.28	0.12		16.4	6.3		112	13			5					22.3	441	7.4	72	3.3		625	8.7
2012	[15840] HIDALGO S.(2012) [GeoReM [6536] ]	ANDEAN ARC / NORTHERN ANDEAN VOLCANIC ZONE / ECUADOR / ATACAZO-NINAHUILCA//	-78.619	-0.357	54.6	VOLCANIC ROCK	DACITE			QUATERNARY		65.32	0.99946	62.2857	24.1126	0.053211	0.52	16.97		5.14	9.256	4.63	4.83	1.65	0.06	1.16	4.22	0.12		16.9	5.5		102	11			4.5					23.2	436	7	73	3.3		610	8
2012	[15840] HIDALGO S.(2012) [GeoReM [6536] ]	ANDEAN ARC / NORTHERN ANDEAN VOLCANIC ZONE / ECUADOR / ATACAZO-NINAHUILCA//	-78.619	-0.357	54.6	VOLCANIC ROCK	DACITE			QUATERNARY		65.33	0.993439	61.6901	24.1502	0.0545662	0.52	16.94		5.13	9.237	4.62	4.9	1.65	0.06	1.14	4.2	0.12		16.4	6.1		104	12			4.5					23.9	438	7.1	76	3.3		630	7.8
2012	[15840] HIDALGO S.(2012) [GeoReM [6536] ]	ANDEAN ARC / NORTHERN ANDEAN VOLCANIC ZONE / ECUADOR / ATACAZO-NINAHUILCA//	-78.619	-0.357	54.6	VOLCANIC ROCK	DACITE			QUATERNARY		65.33	0.987062	60.5556	23.8719	0.0559633	0.53	16.83		5.21	9.379	4.69	4.8	1.65	0.06	1.17	4.29	0.12		17	6.1		107	14			4.5					24.4	436	7.2	78	3.2		645	8.7
2012	[15840] HIDALGO S.(2012) [GeoReM [6536] ]	ANDEAN ARC / NORTHERN ANDEAN VOLCANIC ZONE / ECUADOR / ATACAZO-NINAHUILCA//	-78.619	-0.357	54.6	VOLCANIC ROCK	DACITE			QUATERNARY		65.4	0.993716	63.4783	23.2014	0.0545662	0.53	16.9		5.18	9.322	4.66	4.8	1.58	0.06	1.16	4.27	0.12		17.1	5.9		102	11			5					23.9	438	6.9	74	3.1		640	8.3
2012	[15840] HIDALGO S.(2012) [GeoReM [6536] ]	ANDEAN ARC / NORTHERN ANDEAN VOLCANIC ZONE / ECUADOR / ATACAZO-NINAHUILCA//	-78.619	-0.357	54.6	VOLCANIC ROCK	DACITE			QUATERNARY		65.42	0.999617	62.2857	23.6132	0.0557339	0.53	16.89		5.19	9.341	4.67	4.86	1.62	0.06	1.17	4.13	0.12		17.3	6		100	12			4.5					24.3	436	7	74	3		600	8.1
2012	[15840] HIDALGO S.(2012) [GeoReM [6536] ]	ANDEAN ARC / NORTHERN ANDEAN VOLCANIC ZONE / ECUADOR / ATACAZO-NINAHUILCA//	-78.619	-0.357	54.6	VOLCANIC ROCK	DACITE			QUATERNARY		65.5	0.967264	62.5714	24.375	0.0513699	0.51	16.68		5.1	9.18	4.59	5	1.66	0.06	1.15	4.2	0.12		15.7	5.8		100	10			4.5					22.5	438	7	72	3.3		625	7.1
2012	[15840] HIDALGO S.(2012) [GeoReM [6536] ]	ANDEAN ARC / NORTHERN ANDEAN VOLCANIC ZONE / ECUADOR / ATACAZO-NINAHUILCA//	-78.619	-0.357	54.6	VOLCANIC ROCK	DACITE			QUATERNARY		65.5	0.97343	63.1429	23.7619	0.0520362	0.52	16.63		5.24	9.436	4.72	4.8	1.65	0.06	1.14	4.33	0.12			6.2		106	12			4					23	442	7	72	2.8		612	7.5
2012	[15840] HIDALGO S.(2012) [GeoReM [6536] ]	ANDEAN ARC / NORTHERN ANDEAN VOLCANIC ZONE / ECUADOR / ATACAZO-NINAHUILCA//	-78.619	-0.357	54.6	VOLCANIC ROCK	DACITE			QUATERNARY		65.6	0.967659	60.2778	24.037	0.0552995	0.54	16.5		5.23	9.407	4.7	4.87	1.67	0.06	1.19	4.2	0.13		17	5.8		102	11			6					24	434	7.2	72	3.2		660	8
2012	[15840] HIDALGO S.(2012) [GeoReM [6536] ]	ANDEAN ARC / NORTHERN ANDEAN VOLCANIC ZONE / ECUADOR / ATACAZO-NINAHUILCA//	-78.619	-0.357	54.6	VOLCANIC ROCK	DACITE			QUATERNARY		65.62	0.955009	58.6667	23.9087	0.0536364	0.53	16.46		5.2	9.36	4.68	4.95	1.65	0.06	1.18	4.23	0.12		17	6		104	12			5					23.6	440	7.5	76	3.2		665	8.7
2012	[15840] HIDALGO S.(2012) [GeoReM [6536] ]	ANDEAN ARC / NORTHERN ANDEAN VOLCANIC ZONE / ECUADOR / ATACAZO-NINAHUILCA//	-78.619	-0.357	54.6	VOLCANIC ROCK	DACITE			QUATERNARY		65.67	0.972629	60.137	24.6682	0.0544419	0.52	16.57		5.11	9.199	4.6	4.91	1.69	0.06	1.2	4.14	0.12		14.6	6.2		102	12			5					23.9	439	7.3	74	3.3		625	8.1
2012	[15840] HIDALGO S.(2012) [GeoReM [6536] ]	ANDEAN ARC / NORTHERN ANDEAN VOLCANIC ZONE / ECUADOR / ATACAZO-NINAHUILCA//	-78.619	-0.357	54.6	VOLCANIC ROCK	DACITE			QUATERNARY		65.69	0.969911	60.137	24.296	0.0537585	0.52	16.53		5.15	9.275	4.64	4.85	1.67	0.06	1.17	4.23	0.12		15.7	6.2		105	12			5					23.6	439	7.3	74	3.3		650	8
2012	[15840] HIDALGO S.(2012) [GeoReM [6536] ]	ANDEAN ARC / NORTHERN ANDEAN VOLCANIC ZONE / ECUADOR / ATACAZO-NINAHUILCA//	-78.619	-0.357	54.6	VOLCANIC ROCK	DACITE			QUATERNARY		65.73	0.955917	60.8451	24.2309	0.056713	0.52	16.51		5.05	9.085	4.54	4.97	1.63	0.06	1.21	4.21	0.12		17	6		101	13			5					24.5	432	7.1	74	3.2		670	8.6
2012	[15840] HIDALGO S.(2012) [GeoReM [6536] ]	ANDEAN ARC / NORTHERN ANDEAN VOLCANIC ZONE / ECUADOR / ATACAZO-NINAHUILCA//	-78.619	-0.357	54.6	VOLCANIC ROCK	DACITE			QUATERNARY		65.84	0.96545	61.2676	23.5765	0.0563218	0.53	16.38		5.2	9.36	4.68	4.76	1.62	0.06	1.22	4.25	0.13		12.9	6		107	12.5			5					24.5	435	7.1	72	3.4		675	8.3
2012	[15840] HIDALGO S.(2012) [GeoReM [6536] ]	ANDEAN ARC / NORTHERN ANDEAN VOLCANIC ZONE / ECUADOR / ATACAZO-NINAHUILCA//	-78.619	-0.357	54.6	VOLCANIC ROCK	DACITE			QUATERNARY		65.73	0.963357	60.9722	24.3683	0.053303	0.53	16.46		5.16	9.294	4.65	4.91	1.68	0.06	1.17	4.19	0.12		15.3	6.2		107	12			5					23.4	439	7.2	73	3.3		650	8
2012	[15840] HIDALGO S.(2012) [GeoReM [6536] ]	ANDEAN ARC / NORTHERN ANDEAN VOLCANIC ZONE / ECUADOR / ATACAZO-NINAHUILCA//	-78.619	-0.357	54.6	VOLCANIC ROCK	DACITE			QUATERNARY		65.79	0.971377	61.5714	23.7249	0.0547564	0.55	16.42		5.22	9.398	4.7	4.81	1.64	0.06	1.2	4.17	0.13		15.3	5.9		103	12			4.5					23.6	431	7	72	3		660	7.8
2012	[15840] HIDALGO S.(2012) [GeoReM [6536] ]	ANDEAN ARC / NORTHERN ANDEAN VOLCANIC ZONE / ECUADOR / ATACAZO-NINAHUILCA//	-78.619	-0.357	54.6	VOLCANIC ROCK	DACITE			QUATERNARY		65.82	0.951717	59.589	24.5242	0.056092	0.52	16.36		5.09	9.161	4.58	4.91	1.67	0.06	1.19	4.24	0.13		15.8	6.2		105	12.5			5					24.4	435	7.3	73	3.3		660	8
2012	[15840] HIDALGO S.(2012) [GeoReM [6536] ]	ANDEAN ARC / NORTHERN ANDEAN VOLCANIC ZONE / ECUADOR / ATACAZO-NINAHUILCA//	-78.619	-0.357	54.6	VOLCANIC ROCK	DACITE			QUATERNARY		66	0.994624	61.4286	23.945	0.055814	0.53	16.45		5.22	9.398	4.7	4.73	1.66	0.06	1.21	4.03	0.11		14.3	6		103	12			5					24	430	7	73	3.3		640	10.2
2012	[15840] HIDALGO S.(2012) [GeoReM [6536] ]	ANDEAN ARC / NORTHERN ANDEAN VOLCANIC ZONE / ECUADOR / ATACAZO-NINAHUILCA//	-78.619	-0.357	54.6	VOLCANIC ROCK	DACITE			QUATERNARY		64.62	0.941891	55.1852	25.7427	0.0514541	0.52	16.83		5.28	9.512	4.76	5.34	1.85	0.07	1.14	4.21	0.13		16.1	7.2		107	12			6.5					23	447	8.1	65	2.9		615	8.3
2012	[15840] HIDALGO S.(2012) [GeoReM [6536] ]	ANDEAN ARC / NORTHERN ANDEAN VOLCANIC ZONE / ECUADOR / ATACAZO-NINAHUILCA//	-78.619	-0.357	54.6	VOLCANIC ROCK	DACITE			QUATERNARY		64.53	0.949351	56.5	24.889	0.0497788	0.54	16.96		5.29	9.521	4.76	5.32	1.77	0.07	1.14	4.23	0.14		16.2	7		115	12			6.5					22.5	452	8	69	3.4		625	8.4
2012	[15840] HIDALGO S.(2012) [GeoReM [6536] ]	ANDEAN ARC / NORTHERN ANDEAN VOLCANIC ZONE / ECUADOR / ATACAZO-NINAHUILCA//	-78.619	-0.357	54.6	VOLCANIC ROCK	DACITE			QUATERNARY		64.68	0.950717	56.625	24.5297	0.0485651	0.54	16.87		5.33	9.597	4.8	5.29	1.75	0.07	1.14	4.19	0.14		16.4	7		118	13			6.5					22	453	8	67	3.3		615	8.5
2019	[23216] BREITFELD H. T. (2019)	LUZON ARC / LUZON ARC / BORNEO / BAU SUITE//	110.375	1.44329	31.3	PLUTONIC ROCK	GRANODIORITE			MIOCENE		67.49	0.989971	53.3818	48.3863	0.0834469	0.52	16.38	3.19				4.41	1.51	0.046	1.83	3.98	0.175	2.35		7.4		57	32		10	19.9	36	53	19	0.4	49	587.2	11	154.1	8.9	0	307	21.9
2019	[23216] BREITFELD H. T. (2019)	LUZON ARC / LUZON ARC / BORNEO / SINTANG SUITE//	110.438	1.70094	31.3	VOLCANIC ROCK	NOT GIVEN			MIOCENE		61.09	0.928165	28.4384	57.7535	0.0363762	0.903	16.72	5.65				2.18	3.9	0.119	1.02	7.87	0.281	1.67		15.2		136	90		27	55.2	24	47	21.2	1.7	21	577.3	20.3	149	6.7	0	237	22.2
2019	[23216] BREITFELD H. T. (2019)	LUZON ARC / LUZON ARC / BORNEO / SINTANG SUITE//	111.546	1.00708	30.5	PLUTONIC ROCK	MONZODIORITE			MIOCENE		59.87	0.958163	12.6755	42.6603	0.11233	1.527	16.57	7.56				4.44	2.84	0.145	1.3	4.75	0.326	2.63		21.9		199	21		19	22.4	74	80	19.6	0.9	43	382.8	30.2	195.6	6.8	3	359	15.2
2022	[25908] SAMANIEGO P. (2022)	ANDEAN ARC / NORTHERN ANDEAN VOLCANIC ZONE / ECUADOR / CARIHUAIRAZO//	-78.7151	-1.43714	46.03	VOLCANIC ROCK	ANDESITE			PLEISTOCENE		61.5	0.900627	56.9231	41.7067	0.0518018	0.68	17.65	5.73				5.35	2.07	0.08	2.28	4.5	0.21	0.06		8.7		118	11		13	10					34.5	666	11.7	123	4.8		628	15.7
2022	[25908] SAMANIEGO P. (2022)	ANDEAN ARC / NORTHERN ANDEAN VOLCANIC ZONE / ECUADOR / CARIHUAIRAZO//	-78.6961	-1.42836	46.03	VOLCANIC ROCK	ANDESITE			PLEISTOCENE		61.2745	0.950436	50.6446	39.9215	0.0409168	0.660212	18.148	6.16979				5.74249	2.07007	0.0971991	1.35617	4.36823	0.227794	0.0636537		9.17174		123.936	2.40996		14.2397	5.7505					25.2729	617.666	12.1961	122.242	4.3367		641.496	14.616
2022	[25908] SAMANIEGO P. (2022)	ANDEAN ARC / NORTHERN ANDEAN VOLCANIC ZONE / ECUADOR / CARIHUAIRAZO//	-78.7495	-1.35442	46.03	VOLCANIC ROCK	ANDESITE			PLEISTOCENE		60.0669	0.946744	55.545	43.2725	0.0348058	0.681989	18.8596	6.04549				5.93793	2.32851	0.10032	1.3671	4.64722	0.232944	0.0189251		9.47012		121.468	4.76311		14.8909	7.64223					24.8046	712.656	12.8303	111.411	4.6136		593.079	14.1601
2022	[25908] SAMANIEGO P. (2022)	ANDEAN ARC / NORTHERN ANDEAN VOLCANIC ZONE / ECUADOR / CARIHUAIRAZO//	-78.7193	-1.37813	46.03	VOLCANIC ROCK	ANDESITE			PLEISTOCENE		60.6089	0.92144	56.8526	42.2748	0.0446216	0.688258	18.0297	6.33502				5.98987	2.34257	0.096538	1.35724	4.38136	0.227596	0.237761		10.0497		130.688	6.09777		16.0304	7.51561					30.2249	677.36	11.9143	113.132	4.83588		598.155	13.6645
2022	[25908] SAMANIEGO P. (2022)	ANDEAN ARC / NORTHERN ANDEAN VOLCANIC ZONE / ECUADOR / CARIHUAIRAZO//	-78.7099	-1.31113	46.03	VOLCANIC ROCK	DACITE			PLEISTOCENE		63.8	0.929079	55	40.8302	0.0409091	0.55	17.28	5.08				5.3	1.77	0.09	1.32	4.58	0.23	0		7.8		90	7		12	5					27	660	12	104	4.5		615	13.4
2022	[25908] SAMANIEGO P. (2022)	ANDEAN ARC / NORTHERN ANDEAN VOLCANIC ZONE / ECUADOR / CARIHUAIRAZO//	-78.6295	-1.33774	46.03	VOLCANIC ROCK	ANDESITE			PLEISTOCENE		62.297	0.937288	57.0733	39.5834	0.0383817	0.515597	17.4585	5.0888				5.01878	1.68345	0.093682	1.45371	4.81956	0.235561	0.717859		6.67225		70.517	4.09012		9.2485	4.88196					24.951	650.074	11.3902	86.8061	4.57267		655.494	13.8682
2022	[25908] SAMANIEGO P. (2022)	ANDEAN ARC / NORTHERN ANDEAN VOLCANIC ZONE / ECUADOR / CARIHUAIRAZO//	-78.6295	-1.33774	46.03	VOLCANIC ROCK	ANDESITE			PLEISTOCENE		61.0028	0.939916	53.6468	44.5706	0.0691108	0.587226	17.1901	5.25129				5.24187	2.13207	0.0884949	1.6452	4.24175	0.189378	1.42738		8.80341		101.873	10.3851		12.7486	9.78308					42.1567	609.988	11.3704	98.3633	4.44766		668.359	13.9337
2022	[25908] SAMANIEGO P. (2022)	ANDEAN ARC / NORTHERN ANDEAN VOLCANIC ZONE / ECUADOR / CARIHUAIRAZO//	-78.6295	-1.33774	46.03	VOLCANIC ROCK	ANDESITE			PLEISTOCENE		60.5699	0.954777	53.4733	39.6843	0.0383911	0.575724	17.8508	5.72965				5.30043	1.90347	0.100331	1.48158	4.5323	0.230543	0.816237		8.01294		98.4089	4.14713		12.1831	4.49708					25.3258	659.678	12.3366	106.681	5.04241		593.045	14.1394
2022	[25908] SAMANIEGO P. (2022)	ANDEAN ARC / NORTHERN ANDEAN VOLCANIC ZONE / ECUADOR / CARIHUAIRAZO//	-78.6434	-1.26868	46.03	VOLCANIC ROCK	ANDESITE			PLEISTOCENE		61.782	0.916279	53.8656	43.8785	0.0351022	0.697031	18.0282	6.32026				5.8336	2.49509	0.0993184	1.40727	4.58714	0.231342	0.0816674		10.7717		129.975	6.98054		14.7828	12.0147					23.9258	681.603	12.6538	96.5022	4.6349		620.745	14.0069
2022	[25908] SAMANIEGO P. (2022)	ANDEAN ARC / NORTHERN ANDEAN VOLCANIC ZONE / ECUADOR / CARIHUAIRAZO//	-78.5949	-1.30388	46.03	VOLCANIC ROCK	ANDESITE			PLEISTOCENE		60.9507	0.91386	55.3754	44.3803	0.0373419	0.673089	17.7616	6.02207				5.83061	2.42625	0.0964466	1.37545	4.46569	0.222318	-0.0806475		10.3045		123.259	5.68902		15.0817	11.5723					25.3552	679.003	12.2618	97.7719	4.48942		618.008	12.8426
2022	[25908] SAMANIEGO P. (2022)	ANDEAN ARC / NORTHERN ANDEAN VOLCANIC ZONE / ECUADOR / CARIHUAIRAZO//	-78.5949	-1.30388	46.03	VOLCANIC ROCK	ANDESITE			PLEISTOCENE		58.6412	0.948257	52.8154	40.7619	0.0414434	0.560131	17.8347	5.65496				5.59043	1.96477	0.103148	1.33798	4.3741	0.236695	2.89602		8.48684		108.626	2.92475		12.9364	6.5409					28.6077	690.283	13.0697	99.3815	4.53992		576.285	14.9265
2022	[25908] SAMANIEGO P. (2022)	ANDEAN ARC / NORTHERN ANDEAN VOLCANIC ZONE / ECUADOR / CARIHUAIRAZO//	-78.5715	-1.30304	46.03	VOLCANIC ROCK	ANDESITE			PLEISTOCENE		62.3703	0.932049	39.7924	40.911	0.10318	0.650398	17.016	5.6396				4.9894	1.97156	0.086175	2.03554	4.24425	0.203576	0.340938		8.49621		108.184	2.63032		14.1132	6.02057					61.0848	592.02	14.8777	138.506	5.99367		844.032	18.519
2022	[25908] SAMANIEGO P. (2022)	ANDEAN ARC / NORTHERN ANDEAN VOLCANIC ZONE / ECUADOR / CARIHUAIRAZO//	-78.598	-1.31127	46.03	VOLCANIC ROCK	ANDESITE			PLEISTOCENE		60.2113	0.936605	53.5518	44.6961	0.0660479	0.656416	17.9208	5.81341				5.60924	2.37232	0.0960146	1.41602	4.50007	0.218644	0.0366625		10.0856		120.717	6.23045		14.5513	10.6759					45.0409	681.943	12.7343	94.1216	4.71494		596.724	13.2175
2022	[25908] SAMANIEGO P. (2022)	ANDEAN ARC / NORTHERN ANDEAN VOLCANIC ZONE / ECUADOR / CARIHUAIRAZO//	-78.6505	-1.2944	46.03	VOLCANIC ROCK	ANDESITE			PLEISTOCENE		62.0316	0.93018	57.1957	44.3701	0.0562781	0.613168	17.4815	5.52901				5.5054	2.22668	0.0941613	1.38283	4.42997	0.216749	0.576676		9.10219		107.147	6.80041		13.4832	9.33335					36.9034	655.732	11.4647	89.9552	4.55437		598.911	12.892
2022	[25908] SAMANIEGO P. (2022)	ANDEAN ARC / NORTHERN ANDEAN VOLCANIC ZONE / ECUADOR / CARIHUAIRAZO//	-78.6505	-1.2944	46.03	VOLCANIC ROCK	ANDESITE			PLEISTOCENE		61.4496	0.945717	55.5765	40.4591	0.0481441	0.575618	17.8164	5.81865				5.60634	1.99642	0.0997944	1.40232	4.33313	0.227568	0.674548		8.06654		99.8359	5.88326		12.0999	5.53159					32.0001	664.674	11.9596	105.975	4.35937		592.903	13.7381
2022	[25908] SAMANIEGO P. (2022)	ANDEAN ARC / NORTHERN ANDEAN VOLCANIC ZONE / ECUADOR / CARIHUAIRAZO//	-78.6505	-1.2944	46.03	VOLCANIC ROCK	DACITE			PLEISTOCENE		63.1064	0.972313	55.9624	37.466	0.0633916	0.52697	17.4951	5.81865				4.94827	1.76024	0.0908756	1.54114	4.45496	0.205535	0.680748		7.14193		114.156	5.77976		10.308	6.71322					39.7488	627.035	11.2046	100.94	4.62613		658.472	14.1027
2022	[25908] SAMANIEGO P. (2022)	ANDEAN ARC / NORTHERN ANDEAN VOLCANIC ZONE / ECUADOR / CARIHUAIRAZO//	-78.6636	-1.3093	46.03	VOLCANIC ROCK	ANDESITE			PLEISTOCENE		62.3857	0.949949	59.8162	43.2084	0.0485521	0.592581	17.1972	5.62202				5.45839	2.15976	0.0956958	1.35998	4.07728	0.218333	0.583222		9.0176		110.363	11.4087		14.6971	9.20305					31.552	649.859	10.8643	94.2428	4.28371		626.59	13.2857
2019	[22739] BABLON M. (2019)	ANDEAN ARC / NORTHERN ANDEAN VOLCANIC ZONE / ECUADOR / HUISLA-MULMUL//	-78.5374	-1.4099	46.03	VOLCANIC ROCK	NOT GIVEN			QUATERNARY		60.35	0.907751	43.851	44.2223	0.0873669	0.77	17.81	6.22				5.72	2.49	0.1	2.12	4.21	0.23	0.96		11.74		150.78	5.48		15.43	5.36					57.85	662.15	15.1	132.16	5.9		927.85	18.85
2019	[22739] BABLON M. (2019)	ANDEAN ARC / NORTHERN ANDEAN VOLCANIC ZONE / ECUADOR / HUISLA-MULMUL//	-78.5398	-1.4175	46.03	VOLCANIC ROCK	NOT GIVEN			QUATERNARY		60.72	0.927781	34.8876	40.9392	0.103562	0.74	17.76	6.4				5.43	2.24	0.1	2.09	4.26	0.25	0.01		9.48		123.52	7.1		15.14	3.99					63.3	611.23	17.52	151.88	7.02		870.18	20.99
2019	[22739] BABLON M. (2019)	ANDEAN ARC / NORTHERN ANDEAN VOLCANIC ZONE / ECUADOR / HUISLA-MULMUL//	-78.5431	-1.421	46.03	VOLCANIC ROCK	NOT GIVEN			QUATERNARY		61.08	0.914169	28.489	43.6698	0.114983	0.77	17.37	6.31				5.59	2.47	0.11	2.04	4.03	0.22	0.06		12.45		140.61	9.55		15.03	7.69					62.37	542.43	19.04	145.22	5.99		845.11	20.1
2019	[22739] BABLON M. (2019)	ANDEAN ARC / NORTHERN ANDEAN VOLCANIC ZONE / ECUADOR / IGUALATA//	-78.5677	-1.6329	46.03	VOLCANIC ROCK	NOT GIVEN			QUATERNARY		61.23	0.880238	81.5266	43.5612	0.0391582	0.62	17.41	6.03				5.81	2.35	0.1	1.69	4.49	0.28	0.2		8.52		118.9	21.52		13.73	17.03					37.16	948.97	11.64	116.87	4.57		901.1	21.9
2019	[22739] BABLON M. (2019)	ANDEAN ARC / NORTHERN ANDEAN VOLCANIC ZONE / ECUADOR / IGUALATA//	-78.6817	-1.5533	46.03	VOLCANIC ROCK	NOT GIVEN			QUATERNARY		65.87	0.940599	47.88	44.9833	0.133428	0.54	16.29	4.36				4.2	1.8	0.06	2.38	4.32	0.18	1.33		6.93		90.21	17.94		11.06	13.52					71.36	534.82	11.17	145.29	4.65		949.89	19.33
1996	[12025] NGUYEN H. (1996)	CENTRAL ASIAN FOLDBELT - CENOZOIC/QUATERNARY / VIETNAM - CENOZOIC/QUATERNARY / XUAN LOC PLATEAU/	107.25	10.9	29.4	VOLCANIC ROCK	ANDESITE, THOLEIITIC			MIOCENE		57.58	0.845749	50.2692	49.6851	0.0780413	1.02	17.99			5.74		3.37	3.18	0.11	4.69	6.12	0.68			6.3			45			54	18	118			102	1307	26	619	115		352	88.4
2012	[16966] VAN WYK DE VRIES B. (2012)	CENTRAL AMERICAN VOLCANIC ARC / CENTRAL AMERICAN VOLCANIC ARC-NORTHWESTERN SEGMENT / NICARAGUA / MADERAS//	-85.515	11.4456	33.83	VOLCANIC ROCK	ANDESITE			QUATERNARY		60.23	0.880552	9.56522	33.9127	0.154545	1.13	16.97	7.14				4.94	1.85	0.19	2.82	4.4	0.53					125	56		24	14	16	90	19		68	440	46	306	26.2		1759
2012	[16966] VAN WYK DE VRIES B. (2012)	CENTRAL AMERICAN VOLCANIC ARC / CENTRAL AMERICAN VOLCANIC ARC-NORTHWESTERN SEGMENT / NICARAGUA / MADERAS//	-85.515	11.4456	33.83	VOLCANIC ROCK	ANDESITE			QUATERNARY		57.01	0.865795	17.6129	36.6049	0.0970696	0.97	18.7	7.1				7	2.07	0.15	2.33	3.86	0.44					123	58		25	14	44	74	19		53	546	31	246	22.4		1150
2012	[16966] VAN WYK DE VRIES B. (2012)	CENTRAL AMERICAN VOLCANIC ARC / CENTRAL AMERICAN VOLCANIC ARC-NORTHWESTERN SEGMENT / NICARAGUA / MADERAS//	-85.515	11.4456	33.83	VOLCANIC ROCK	ANDESITE			QUATERNARY		57.34	0.878652	16.7812	37.8557	0.0968343	0.96	19.08	6.86				7.03	2.11	0.15	2.22	3.97	0.41					127	108		24	14	49	70	17		52	537	32	234	21.8		1523
2012	[16966] VAN WYK DE VRIES B. (2012)	CENTRAL AMERICAN VOLCANIC ARC / CENTRAL AMERICAN VOLCANIC ARC-NORTHWESTERN SEGMENT / NICARAGUA / MADERAS//	-85.515	11.4456	33.83	VOLCANIC ROCK	ANDESITE			QUATERNARY		57.46	0.858766	8.7	38.3561	0.128736	1.15	17.03	7.83				5.83	2.46	0.2	2.51	3.96	0.44					122	57		26	14	49	77	17		56	435	50	274	25.4		1504
2012	[16966] VAN WYK DE VRIES B. (2012)	CENTRAL AMERICAN VOLCANIC ARC / CENTRAL AMERICAN VOLCANIC ARC-NORTHWESTERN SEGMENT / NICARAGUA / MADERAS//	-85.515	11.4456	33.83	VOLCANIC ROCK	ANDESITE			QUATERNARY		57.79	0.839567	13.8235	41.8664	0.134043	0.91	16.94	7.26				6.32	2.64	0.16	2.63	3.55	0.35					151	81		25	14	66	68	17		63	470	34	265	24.2		1560
2012	[16966] VAN WYK DE VRIES B. (2012)	CENTRAL AMERICAN VOLCANIC ARC / CENTRAL AMERICAN VOLCANIC ARC-NORTHWESTERN SEGMENT / NICARAGUA / MADERAS//	-85.515	11.4456	33.83	VOLCANIC ROCK	ANDESITE, BASALTIC			QUATERNARY		56.25	0.833361	12.4146	36.193	0.100196	1.18	16.98	8.24				6.24	2.36	0.2	2.37	3.93	0.55					152	58		27	15	58	98	20		51	509	41	253	23.7		1551
2012	[16966] VAN WYK DE VRIES B. (2012)	CENTRAL AMERICAN VOLCANIC ARC / CENTRAL AMERICAN VOLCANIC ARC-NORTHWESTERN SEGMENT / NICARAGUA / MADERAS//	-85.515	11.4456	33.83	VOLCANIC ROCK	ANDESITE			QUATERNARY		59.23	0.831983	11.6977	34.2489	0.107356	1.13	17.52	7.11				5.29	1.87	0.19	2.56	5.27	0.57					79	56		25	14	20	101	19		54	503	43	283	28.5		1557
1985	[14413] BICE D. C. (1985)	CENTRAL AMERICAN VOLCANIC ARC / CENTRAL AMERICAN VOLCANIC ARC-NORTHWESTERN SEGMENT / NICARAGUA///	-86.03	11.92	22.73	VOLCANIC ROCK	DACITE			QUATERNARY		66.41	0.985755	11.9858	22.1679	0.116568	0.55	14.99		1.38	3.442	2.2	3.66	0.55	0.12	2.05	3.85	0.13										8.4	61	13.4		39.4	338	28.2	155	5.7	5.6	1446	7.1
2011	[15432] SAGINOR I. (2011)	CENTRAL AMERICAN VOLCANIC ARC / CENTRAL AMERICAN VOLCANIC ARC-NORTHWESTERN SEGMENT / NICARAGUA / COYOL GROUP//	-86.85	12.6	27.42	VOLCANIC ROCK	ANDESITE			NEOGENE		60.54	0.934205	12.2536	37.7181	0.173267	0.69	16.73	4.84				5.33	1.48	0.26	2.44	3.39	0.25					102	2			18	47	58			70	404	32.97	175	3.53		1634	13.71
2011	[15432] SAGINOR I. (2011)	CENTRAL AMERICAN VOLCANIC ARC / CENTRAL AMERICAN VOLCANIC ARC-NORTHWESTERN SEGMENT / NICARAGUA / COYOL GROUP//	-86.85	12.6	27.42	VOLCANIC ROCK	DACITE			NEOGENE		67.06	0.96695	8.06498	22.4343	0.136691	0.55	14.63	4.04				3.16	0.59	0.06	2.12	4.31	0.14					109	3			32	232	50			38	278	34.47	166	4.09		1348	13.92
1985	[14413] BICE D. C. (1985)	CENTRAL AMERICAN VOLCANIC ARC / CENTRAL AMERICAN VOLCANIC ARC-NORTHWESTERN SEGMENT / NICARAGUA///	-86.32	12.22	27.42	VOLCANIC ROCK	DACITE			QUATERNARY		66.96	0.918211	11.0409	22.4199	0.13165	0.44	14.67		0.81	3.639	2.91	3.96	0.59	0.12	2.06	3.98	0.16										21	65	13.9		39.1	297	26.9	144	6.3	2.4	1367	14.2
2011	[15432] SAGINOR I. (2011)	CENTRAL AMERICAN VOLCANIC ARC / CENTRAL AMERICAN VOLCANIC ARC-NORTHWESTERN SEGMENT / NICARAGUA / ENCANTO UNIT//	-87.2771	12.7146	19.42	VOLCANIC ROCK	ANDESITE			NEOGENE		58.99	0.921605	10.201	34.6824	0.0558824	0.64	16.25	7.87				6.06	2.11	0.14	1.05	3.33	0.13					169	1			24	171	66			19	340	33.33	86	1.22		875	6.7
2011	[15432] SAGINOR I. (2011)	CENTRAL AMERICAN VOLCANIC ARC / CENTRAL AMERICAN VOLCANIC ARC-NORTHWESTERN SEGMENT / NICARAGUA / TINAJAS UNIT//	-87.1981	12.796	19.42	VOLCANIC ROCK	ANDESITE			NEOGENE		58.69	0.870685	15.9269	44.0963	0.0601093	0.62	15.76	6.98				6.51	2.78	0.13	1.35	2.92	0.13					207	6			17	77	55			22	366	22.98	96	1.6		1033	7.5
2011	[15432] SAGINOR I. (2011)	CENTRAL AMERICAN VOLCANIC ARC / CENTRAL AMERICAN VOLCANIC ARC-NORTHWESTERN SEGMENT / NICARAGUA / TINAJAS UNIT//	-87.1981	12.796	19.42	VOLCANIC ROCK	ANDESITE			NEOGENE		57.61	0.95771	15.8628	38.5297	0.0278373	0.7	17.05	7.52				5.78	2.38	0.18	1.07	3.73	0.19					115	1			20	47	83			13	467	29.44	55	1.17		984	7.89
1987	[2795] MUKASA S. B. (1987)	LUZON ARC / LUZON ARC / MINDORO///	121.23	13.5	30.41	VOLCANIC ROCK	ANDESITE			PLIOCENE		61.72	0.908909	27.2727	42.0921	0.118333	0.6	17.61		5.64			6.09	2.3		2.26	3.56	0.22			14		129	7			8					71	600	22	155	9		741
2013	[19692] LINDSAY J. M. (2013)	LESSER ANTILLES / LESSER ANTILLES / ST. LUCIA / SOUFRIERE VOLCANIC COMPLEX//	-60.902	13.8137	21.98	VOLCANIC ROCK	ANDESITE			HOLOCENE		62.7378	0.945837	20.8125	42.6978	0.213213	0.42001	16.6051	4.93268				5.65549	1.85586	0.113305	1.49445	3.43822	0.0947465	1.85526		11.7212		49.8152	24.4192		39.0178	2.9303	12.751	76.1879	17.801		69.3505	325.264	15.6283	116.235	7.81414	3.33816	447.36	25.6791
2013	[19692] LINDSAY J. M. (2013)	LESSER ANTILLES / LESSER ANTILLES / ST. LUCIA / SOUFRIERE VOLCANIC COMPLEX//	-61.05	13.87	15.81	VOLCANIC ROCK	ANDESITE			HOLOCENE		57.2532	0.901591	6.90069	42.5811	0.2219	0.717794	16.8821	8.61504				6.95854	3.22587	0.302585	1.17147	2.92115	0.0937535					199.565	0			0		70.2494			39.3364	177.271	25.6888	98.3433			255.105
2013	[19692] LINDSAY J. M. (2013)	LESSER ANTILLES / LESSER ANTILLES / ST. LUCIA / SOUFRIERE VOLCANIC COMPLEX//	-61.05	13.87	15.81	VOLCANIC ROCK	ANDESITE			HOLOCENE		58.9319	0.90994	7.56863	41.8001	0.264407	0.677525	17.3141	7.48552				6.9814	2.7146	0.134622	1.14311	3.09867	0.100646					154.778	0			0		64.2172			49.5805	187.516	24.7754	99.9848			261.446
2013	[19692] LINDSAY J. M. (2013)	LESSER ANTILLES / LESSER ANTILLES / ST. LUCIA / SOUFRIERE VOLCANIC COMPLEX//	-61.05	13.87	15.81	VOLCANIC ROCK	DACITE			HOLOCENE		65.2761	0.999234	15.9716	41.3431	0.209345	0.389971	16.928	3.78846				5.22577	1.34827	0.094749	1.73977	3.37792	0.127827					12.7095	0			0		75.7635			66.4722	317.525	19.8806	126.832			526.388
2013	[19692] LINDSAY J. M. (2013)	LESSER ANTILLES / LESSER ANTILLES / ST. LUCIA / SOUFRIERE VOLCANIC COMPLEX//	-61.0633	13.7881	15.81	VOLCANIC ROCK	ANDESITE			HOLOCENE		64.4637	0.988098	16.3662	42.2026	0.211043	0.380201	16.4278	3.93309				5.20109	1.45008	0.0980324	1.71606	3.2291	0.120187					16.3257	0			0		77.1505			63.1641	299.295	18.2873	116.304			518.379
2013	[19692] LINDSAY J. M. (2013)	LESSER ANTILLES / LESSER ANTILLES / ST. LUCIA / SOUFRIERE VOLCANIC COMPLEX//	-61.0369	13.8017	15.81	VOLCANIC ROCK	ANDESITE			HOLOCENE		62.1875	0.996324	16.2262	42.4935	0.147789	0.492659	17.7195	5.05532				6.32525	1.88618	0.113617	1.36203	2.92427	0.14734					26.6255	0			0		89.169			48.0487	325.117	20.0365	121.958			451.691
2013	[19692] LINDSAY J. M. (2013)	LESSER ANTILLES / LESSER ANTILLES / ST. LUCIA / SOUFRIERE VOLCANIC COMPLEX//	-61.0369	13.8017	15.81	VOLCANIC ROCK	ANDESITE			HOLOCENE		62.1185	0.993272	21.5449	42.6016	0.159808	0.498193	17.6383	5.16757				6.36819	1.93661	0.114812	1.34964	2.86853	0.148114					19.0674	0			0		90.5507			52.6767	329.624	15.2994	124.224			449.1
2013	[19692] LINDSAY J. M. (2013)	LESSER ANTILLES / LESSER ANTILLES / ST. LUCIA / SOUFRIERE VOLCANIC COMPLEX//	-61.0401	13.8206	15.81	VOLCANIC ROCK	DACITE			HOLOCENE		65.1982	0.999948	18.2353	43.5088	0.258065	0.436307	16.8375	4.10525				5.47367	1.59649	0.0971775	1.70556	3.06407	0.113043	0.712522		8.92446		32.723	9.91607		15.4162	0.991607	7.90957	75.3621	17.5315		79.3286	307.398	16.8573	128.909	8.92446	3.78146	504.728	21.7402
2013	[19692] LINDSAY J. M. (2013)	LESSER ANTILLES / LESSER ANTILLES / ST. LUCIA / SOUFRIERE VOLCANIC COMPLEX//	-61.0348	13.7653	15.81	VOLCANIC ROCK	ANDESITE			HOLOCENE		62.393	0.994844	21.25	41.0791	0.202941	0.493928	17.7419	5.10722				6.35192	1.7979	0.115579	1.39288	2.9043	0.133361	0.971955		8.89071		29.6357	12.8421		32.0667	4.93928	11.0505	83.9678	18.9502		68.1621	335.871	15.8057	121.506	7.90285	3.03752	437.62	18.4757
2013	[19692] LINDSAY J. M. (2013)	LESSER ANTILLES / LESSER ANTILLES / ST. LUCIA / SOUFRIERE VOLCANIC COMPLEX//	-61.0509	13.7763	15.81	VOLCANIC ROCK	ANDESITE			HOLOCENE		57.7626	0.98953	18	41.622	0.187135	0.458943	16.5403	4.8189				5.86529	1.7348	0.106475	1.29422	2.82709	0.124832	1.73026		9.17886		29.3723	11.9325		28.5203	4.58943	12.8281	80.774	19.1088		58.7447	313.917	17.4398	115.654	6.4252	3.08091	405.706	19.5184
2013	[19692] LINDSAY J. M. (2013)	LESSER ANTILLES / LESSER ANTILLES / ST. LUCIA / SOUFRIERE VOLCANIC COMPLEX//	-61.05	13.7751	15.81	VOLCANIC ROCK	DACITE			HOLOCENE		64.8821	0.982968	21	41.5878	0.257143	0.402506	16.6991	3.87781				5.2424	1.39405	0.0932637	1.78674	3.35749	0.110935	1.36534		7.85378		24.5431	11.7807		16.5137	1.96345	8.33261	70.684	17.742		79.5196	309.243	14.7258	121.734	7.85378	4.17872	515.405	21.199
2013	[19692] LINDSAY J. M. (2013)	LESSER ANTILLES / LESSER ANTILLES / ST. LUCIA / SOUFRIERE VOLCANIC COMPLEX//	-61.0534	13.7792	15.81	VOLCANIC ROCK	DACITE			HOLOCENE		63.8384	0.954982	19.75	37.6309	0.253165	0.38209	16.7434	4.21278				5.31007	1.28343	0.10385	1.69491	3.67394	0.117566	1.59879		6.85802		21.5538	12.7363		28.6004	3.91887	11.376	69.5599	17.9514		78.3774	309.591	15.6755	119.525	6.85802	3.93565	468.305	20.5857
1998	[5027] ROTOLO S. G. (1998)	CENTRAL AMERICAN VOLCANIC ARC / CENTRAL AMERICAN VOLCANIC ARC-NORTHWESTERN SEGMENT / EL SALVADOR / CHICHONTEPEC (CINOTEPEC)//	-88.78	13.63	29.97	VOLCANIC ROCK	NOT GIVEN			NEOGENE		67.07	0.959246	26.0952	38.8275	0.0237226	0.55	15.38		4.2	4.1	0.32	3.9	1.46	0.11	1.97	4.14	0.13	0.7				93	5		13	2					13	548	21	81			981	15
2019	[22967] PEDRAZZI D. (2019)	CENTRAL AMERICAN VOLCANIC ARC / CENTRAL AMERICAN VOLCANIC ARC-NORTHWESTERN SEGMENT / EL SALVADOR / ILOPANGO CALDERA / TIERRA BLANCA JOVEN ERUPTION/	-89.0894	13.7084	18	VOLCANIC ROCK	DACITE			HOLOCENE		67.34	0.941905	18.1176	40.9342	0.12013	0.408	14.833	3.475				3.453	1.216	0.122	2.188	4.317	0.133	2.49	14	5	0	40	3		5	2	9	47	14		37	308	17	144	3	2	997	12
2021	[24875] CISNEROS DE LEON A. (2021)	CENTRAL AMERICAN VOLCANIC ARC / CENTRAL AMERICAN VOLCANIC ARC-NORTHWESTERN SEGMENT / EL SALVADOR / ILOPANGO CALDERA / TIERRA BLANCA JOVEN ERUPTION/	-89.1574	13.715	18	VOLCANIC ROCK	ANDESITE		45000	HOLOCENE		62.54	0.946993	28.5882	38.3817	0.063786	0.49	17.58	4.96				5.33	1.56	0.14	1.45	4.44	0.25					64	18		14	2		69	18		31	486	17	127	3		735	14
2021	[24875] CISNEROS DE LEON A. (2021)	CENTRAL AMERICAN VOLCANIC ARC / CENTRAL AMERICAN VOLCANIC ARC-NORTHWESTERN SEGMENT / EL SALVADOR / ILOPANGO CALDERA / TIERRA BLANCA JOVEN ERUPTION/	-89.1031	13.6342	18	VOLCANIC ROCK	RHYOLITE		45000	HOLOCENE		66.7	0.969619	21.2	35.0938	0.132075	0.35	14.79	3.26				3.2	0.89	0.11	2.03	4.4	0.13					37	18		9	2		57	14		42	318	15	148	7		987	14
2021	[24875] CISNEROS DE LEON A. (2021)	CENTRAL AMERICAN VOLCANIC ARC / CENTRAL AMERICAN VOLCANIC ARC-NORTHWESTERN SEGMENT / EL SALVADOR / ILOPANGO CALDERA / TIERRA BLANCA JOVEN ERUPTION/	-89.1319	13.7725	18	VOLCANIC ROCK	RHYOLITE		45000	HOLOCENE		67.71	0.972023	19.125	35.1473	0.150327	0.33	14.74	2.96				3.04	0.81	0.1	2.11	4.47	0.1					44	18		7	2		52	14		46	306	16	145	7		1045	14
2021	[24875] CISNEROS DE LEON A. (2021)	CENTRAL AMERICAN VOLCANIC ARC / CENTRAL AMERICAN VOLCANIC ARC-NORTHWESTERN SEGMENT / EL SALVADOR / ILOPANGO CALDERA / TIERRA BLANCA JOVEN ERUPTION/	-89.1476	13.6518	18	VOLCANIC ROCK	RHYOLITE		45000	HOLOCENE		67.46	0.968642	18.5294	35.5181	0.142857	0.36	14.89	3.2				3.16	0.89	0.11	2.07	4.49	0.11					42	18		6	2		56	14		45	315	17	150	7		1004	14
1984	[5446] WRIGHT J. V. (1984)	LESSER ANTILLES / LESSER ANTILLES / ST. LUCIA / QUALIBOU (LA SOUFRIERE)//	-60.9	14.5	19.01	VOLCANIC ROCK	DACITE			QUATERNARY		63.61	0.97402	50	36.0907	0.213333	0.43	17.27	4.98				5.81	1.42		1.5	3.37	0.11			16		59	15	1060		10	17	93			64	300	6	97			450	18
1984	[5446] WRIGHT J. V. (1984)	LESSER ANTILLES / LESSER ANTILLES / ST. LUCIA / QUALIBOU (LA SOUFRIERE)//	-60.9	14.5	19.01	VOLCANIC ROCK	DACITE			QUATERNARY		65.94	0.976314	49.8333	33.9262	0.254181	0.34	16.87	3.51				4.64	0.91		2.03	4.04	0.11			7		15	15	888		10	29	87			76	299	6	101			613	34
2011	[15482] GERMA A. (2011)	LESSER ANTILLES / LESSER ANTILLES / MARTINIQUE / CONIL//	-61.1972	14.8453	16.76	VOLCANIC ROCK	ANDESITE			QUATERNARY		60.34	0.898364	17.5581	44.4212	0.0878441	0.49	17.22	6.74				6.92	2.72	0.16	1.07	3.3	0.14	0.5													24.57	279.7	15.93	80.3	2.11		181.6	9.165
2011	[15482] GERMA A. (2011)	LESSER ANTILLES / LESSER ANTILLES / MARTINIQUE / CONIL//	-61.1775	14.8435	16.76	VOLCANIC ROCK	DACITE			QUATERNARY		63.98	0.937508	18.5838	42.0115	0.112021	0.4	16.86	5.44				5.86	1.99	0.14	1.27	3.62	0.13	0.3													31.31	279.5	15.04	92.47	2.299		218.3	10.68
2011	[15482] GERMA A. (2011)	LESSER ANTILLES / LESSER ANTILLES / MARTINIQUE / CONIL//	-61.1929	14.8229	16.76	VOLCANIC ROCK	ANDESITE			QUATERNARY		61.56	0.893135	16.7945	40.831	0.105962	0.5	17.46	6.4				7.07	2.23	0.15	1.17	3.3	0.11	0.18													27.37	258.3	15.38	82.52	2.126		197.9	9.596
2011	[15482] GERMA A. (2011)	LESSER ANTILLES / LESSER ANTILLES / MARTINIQUE / CONIL//	-61.1871	14.8222	16.76	VOLCANIC ROCK	ANDESITE			QUATERNARY		61.44	0.902764	15.1074	43.8643	0.126264	0.53	16.47	6.97				6.47	2.75	0.17	1.2	3.15	0.13	0.2													31.97	253.2	16.76	88.12	2.236		206.3	10.27
1998	[5027] ROTOLO S. G. (1998)	CENTRAL AMERICAN VOLCANIC ARC / CENTRAL AMERICAN VOLCANIC ARC-NORTHWESTERN SEGMENT / EL SALVADOR / CHICHONTEPEC (CINOTEPEC)//	-88.85	14.61	43.91	VOLCANIC ROCK	DACITE			NEOGENE		66.86	0.965656	9.78378	24.7485	0.110497	0.65	15.51		3.75	4.39	1.02	3.3	0.81	0.11	1.94	4.84	0.25	0.95				31	3		11	3					40	362	37	186	3		1260	20.7
1998	[5027] ROTOLO S. G. (1998)	CENTRAL AMERICAN VOLCANIC ARC / CENTRAL AMERICAN VOLCANIC ARC-NORTHWESTERN SEGMENT / EL SALVADOR / CHICHONTEPEC (CINOTEPEC)//	-88.85	14.61	43.91	VOLCANIC ROCK	ANDESITE			NEOGENE		58.71	0.931814	21.2609	42.6099	0.0470348	0.7	18.19		2.63	6.77	4.4	6.21	2.82	0.16	1.16	4.24	0.29	0.5				108	8		22	6					23	489	23	115	3		594	10
2005	[8431] LINDSAY J. M.(2005) [GeoReM [1589] ]	LESSER ANTILLES / LESSER ANTILLES / DOMINICA / MORNE ANGLAIS//	-61.3	15.3	24.42	VOLCANIC ROCK	ANDESITE			NEOGENE		61.17	0.984059	11.6667	42.017	0.185714	0.53	16.97	6.45				5.82	2.36	0.15	1.46	3.09	0.12					118						59			39	210	18	98			264	11
2005	[8431] LINDSAY J. M.(2005) [GeoReM [1589] ]	LESSER ANTILLES / LESSER ANTILLES / DOMINICA / MORNE TROIS PITON COMPLEX//	-61.3	15.4	24.42	VOLCANIC ROCK	ANDESITE			NEOGENE		61.8	0.931695	10.3333	43.0074	0.165899	0.54	16.87	6.64				6.14	2.53	0.15	1.43	3.28	0.12					117						61			36	217	21	92			273
2005	[8431] LINDSAY J. M.(2005) [GeoReM [1589] ]	LESSER ANTILLES / LESSER ANTILLES / DOMINICA / MORNE TROIS PITON COMPLEX//	-61.3	15.4	24.42	VOLCANIC ROCK	ANDESITE			NEOGENE		62.18	0.934634	12.5882	43.4173	0.182243	0.54	16.92	6.53				6.09	2.53	0.15	1.45	3.32	0.12		24	17		116			15	4	44	55	17		39	214	17	96	2.9	1.7	260	10
2005	[8431] LINDSAY J. M.(2005) [GeoReM [1589] ]	LESSER ANTILLES / LESSER ANTILLES / DOMINICA / PLAT PAYS / PLAT PAYS VOLCANIC COMPLEX/	-61.3	15.29	24.42	VOLCANIC ROCK	ANDESITE			NEOGENE		60.56	0.968373	11.5556	44.8506	0.177885	0.56	17.27	6.77				6.17	2.78	0.15	1.31	3.16	0.1		22	18		122			15	6	36	56	16		37	208	18	88	2.7	2.1	242	10
2005	[8431] LINDSAY J. M.(2005) [GeoReM [1589] ]	LESSER ANTILLES / LESSER ANTILLES / DOMINICA / PLAT PAYS / PLAT PAYS VOLCANIC COMPLEX/	-61.3	15.29	24.42	VOLCANIC ROCK	ANDESITE			NEOGENE		61.19	0.952058	12.2778	44.4676	0.162896	0.54	17.12	6.48				6.2	2.62	0.15	1.29	3.23	0.12		24	18		111			15	4	46	56	17		36	221	18	98	2.9	2	236	11
2005	[8431] LINDSAY J. M.(2005) [GeoReM [1589] ]	LESSER ANTILLES / LESSER ANTILLES / DOMINICA / PLAT PAYS / PLAT PAYS VOLCANIC COMPLEX/	-61.3	15.29	24.42	VOLCANIC ROCK	NOT GIVEN			NEOGENE		61.95	0.974565	11.2105	41.4992	0.201878	0.51	16.6	6.17				5.68	2.21	0.14	1.53	3.07	0.12		18	15		104			13	5	32	57	17		43	213	19	100	3.3	2.6	274	12
2005	[8431] LINDSAY J. M.(2005) [GeoReM [1589] ]	LESSER ANTILLES / LESSER ANTILLES / DOMINICA / PLAT PAYS / PLAT PAYS VOLCANIC COMPLEX/	-61.3	15.29	24.42	VOLCANIC ROCK	NOT GIVEN			NEOGENE		62.04	0.944275	11.2105	41.9749	0.206573	0.51	16.51	6.16				5.82	2.25	0.14	1.59	3.15	0.12		19	16		109			13	5	32	49	17		44	213	19	99	3.2	2.5	270	11
2005	[8431] LINDSAY J. M.(2005) [GeoReM [1589] ]	LESSER ANTILLES / LESSER ANTILLES / DOMINICA / PLAT PAYS / PLAT PAYS VOLCANIC COMPLEX/	-61.3	15.29	24.42	VOLCANIC ROCK	NOT GIVEN			NEOGENE		62.66	0.964466	10.35	41.2989	0.227053	0.44	16.18	5.63				5.44	2	0.14	1.65	3.1	0.11					83						58			47	207	20	99			276
2005	[8431] LINDSAY J. M.(2005) [GeoReM [1589] ]	LESSER ANTILLES / LESSER ANTILLES / DOMINICA / PLAT PAYS / PLAT PAYS VOLCANIC COMPLEX/	-61.3	15.29	24.42	VOLCANIC ROCK	NOT GIVEN			NEOGENE		61.72	0.876409	10.2	43.0232	0.186275	0.5	16.44	5.98				5.79	2.28	0.14	1.48	4.03	0.11					109						57			38	204	20	86			257
2005	[8431] LINDSAY J. M.(2005) [GeoReM [1589] ]	LESSER ANTILLES / LESSER ANTILLES / DOMINICA / PLAT PAYS / PLAT PAYS VOLCANIC COMPLEX/	-61.3	15.29	24.42	VOLCANIC ROCK	NOT GIVEN			NEOGENE		62.02	0.950626	11.8333	42.7215	0.197183	0.51	16.57	6.24				5.85	2.35	0.15	1.49	3.15	0.09											59			42	213	18	96			254
2005	[8431] LINDSAY J. M.(2005) [GeoReM [1589] ]	LESSER ANTILLES / LESSER ANTILLES / DOMINICA / PLAT PAYS / PLAT PAYS VOLCANIC COMPLEX/	-61.3	15.29	24.42	VOLCANIC ROCK	DACITE			NEOGENE		60.7	0.952871	12.8333	44.079	0.0909091	0.61	17.5	7.01				6.83	2.79	0.16	0.89	3.03	0.13		14	19		142			16	5	8	60	17		21	231	18	94	3.2	1	236	11
2005	[8431] LINDSAY J. M.(2005) [GeoReM [1589] ]	LESSER ANTILLES / LESSER ANTILLES / DOMINICA / PLAT PAYS / PLAT PAYS VOLCANIC COMPLEX/	-61.3	15.29	24.42	VOLCANIC ROCK	DACITE			NEOGENE		63.03	0.929124	11.4737	41.819	0.178899	0.53	16.41	6.42				5.82	2.33	0.15	1.45	3.35	0.12		27	16		85			13	4	44	57	16		39	218	19	98	3.1	1.3	273	12
2005	[8431] LINDSAY J. M.(2005) [GeoReM [1589] ]	LESSER ANTILLES / LESSER ANTILLES / DOMINICA / PLAT PAYS VOLCANIC COMPLEX//	-61.3	15.29	24.42	VOLCANIC ROCK	ANDESITE			NEOGENE		62.09	0.930264	13.875	42.6442	0.189189	0.51	16.59	6.02				5.96	2.26	0.14	1.48	3.28	0.12		22	14		110			13	5	19	57	17		42	222	16	98	3.2	2.4	267	11
2005	[8431] LINDSAY J. M.(2005) [GeoReM [1589] ]	LESSER ANTILLES / LESSER ANTILLES / DOMINICA / PLAT PAYS VOLCANIC COMPLEX//	-61.3	15.29	24.42	VOLCANIC ROCK	ANDESITE			NEOGENE		61.97	0.95994	15.5333	43.116	0.0987124	0.52	17.29	6.48				6.18	2.48	0.15	1.29	3.27	0.12					110						59			23	233	15	99			288
2005	[8431] LINDSAY J. M.(2005) [GeoReM [1589] ]	LESSER ANTILLES / LESSER ANTILLES / DOMINICA / PLAT PAYS VOLCANIC COMPLEX//	-61.3	15.29	24.42	VOLCANIC ROCK	ANDESITE			NEOGENE		61.44	0.937556	11.3	43.0843	0.168142	0.55	17.05	6.75				6.18	2.58	0.16	1.39	3.31	0.13					103						59			38	226	20	95			253
2005	[8431] LINDSAY J. M.(2005) [GeoReM [1589] ]	LESSER ANTILLES / LESSER ANTILLES / DOMINICA / PLAT PAYS VOLCANIC COMPLEX//	-61.3	15.29	24.42	VOLCANIC ROCK	ANDESITE			NEOGENE		60.12	0.893302	10.7368	44.4697	0.205882	0.58	17.28	6.43				6.92	2.6	0.13	1.43	3.17	0.1		17	21		155			17	6	44	59	18		42	204	19	94	2.7	2.6	278	9.9
2005	[8431] LINDSAY J. M.(2005) [GeoReM [1589] ]	LESSER ANTILLES / LESSER ANTILLES / DOMINICA / PLAT PAYS VOLCANIC COMPLEX//	-61.3	15.29	24.42	VOLCANIC ROCK	ANDESITE			NEOGENE		62.54	0.925654	13.5625	42.9783	0.193548	0.53	16.86	6.28				6.16	2.39	0.14	1.45	3.31	0.12					117						56			42	217	16	94			241
2005	[8431] LINDSAY J. M.(2005) [GeoReM [1589] ]	LESSER ANTILLES / LESSER ANTILLES / DOMINICA / PLAT PAYS VOLCANIC COMPLEX//	-61.3	15.29	24.42	VOLCANIC ROCK	DACITE			NEOGENE		63.4	0.933834	10.381	42.0758	0.183486	0.51	16.57	6.08				5.76	2.23	0.14	1.49	3.44	0.12											51			40	218	21	93			272
2005	[8431] LINDSAY J. M.(2005) [GeoReM [1589] ]	LESSER ANTILLES / LESSER ANTILLES / DOMINICA / PLAT PAYS VOLCANIC COMPLEX//	-61.3	15.29	24.42	VOLCANIC ROCK	DACITE			NEOGENE		63.03	0.936927	8.875	42.6957	0.178404	0.51	16.59	6.22				5.83	2.34	0.15	1.49	3.34	0.12					100						52			38	213	24	102			259
2005	[8431] LINDSAY J. M.(2005) [GeoReM [1589] ]	LESSER ANTILLES / LESSER ANTILLES / DOMINICA / PLAT PAYS VOLCANIC COMPLEX//	-61.3	15.29	24.42	VOLCANIC ROCK	ANDESITE			NEOGENE		59.98	0.982727	12.0526	43.7335	0.0786026	0.62	17.62	7.16				6.27	2.81	0.16	1.2	3.18	0.12					119						68			18	229	19	96			256
2005	[8431] LINDSAY J. M.(2005) [GeoReM [1589] ]	LESSER ANTILLES / LESSER ANTILLES / DOMINICA / PLAT PAYS VOLCANIC COMPLEX//	-61.3	15.29	24.42	VOLCANIC ROCK	ANDESITE			NEOGENE		61.87	0.938795	12	42.3433	0.189815	0.53	16.81	6.58				6.03	2.44	0.15	1.49	3.24	0.12					117						59			41	216	18	94			262
2005	[8431] LINDSAY J. M.(2005) [GeoReM [1589] ]	LESSER ANTILLES / LESSER ANTILLES / DOMINICA / PLAT PAYS VOLCANIC COMPLEX//	-61.3	15.29	24.42	VOLCANIC ROCK	DACITE			NEOGENE		62.95	0.953227	12.7059	41.3424	0.194444	0.5	16.61	6.21				5.66	2.21	0.13	1.5	3.35	0.12					116						57			42	216	17	90			270
2005	[8431] LINDSAY J. M.(2005) [GeoReM [1589] ]	LESSER ANTILLES / LESSER ANTILLES / DOMINICA / PLAT PAYS VOLCANIC COMPLEX//	-61.3	15.29	24.42	VOLCANIC ROCK	DACITE			NEOGENE		63.32	0.927079	10.4762	42.3708	0.186364	0.5	16.53	5.98				5.78	2.22	0.14	1.46	3.49	0.12					104						55			41	220	21	98			281
2005	[8431] LINDSAY J. M.(2005) [GeoReM [1589] ]	LESSER ANTILLES / LESSER ANTILLES / DOMINICA / PLAT PAYS VOLCANIC COMPLEX//	-61.3	15.29	24.42	VOLCANIC ROCK	DACITE			NEOGENE		63.42	0.935102	12.8235	42.0039	0.183486	0.52	16.55	6.18				5.78	2.26	0.15	1.46	3.41	0.12		27	14		88			12	3	35	53	16		40	218	17	97	3.1	1.7	267	10
2005	[8431] LINDSAY J. M.(2005) [GeoReM [1589] ]	LESSER ANTILLES / LESSER ANTILLES / DOMINICA / PLAT PAYS VOLCANIC COMPLEX//	-61.3	15.29	24.42	VOLCANIC ROCK	DACITE			NEOGENE		63.37	0.935683	13.2353	39.1809	0.177778	0.52	16.57		6.17			5.81	2.23	0.15	1.48	3.37	0.12		25	14					13	4	38	57	16		40	225	17	102	3.1	1.8	278	11
2005	[8431] LINDSAY J. M.(2005) [GeoReM [1589] ]	LESSER ANTILLES / LESSER ANTILLES / DOMINICA / PLAT PAYS VOLCANIC COMPLEX//	-61.3	15.29	24.42	VOLCANIC ROCK	DACITE			NEOGENE		63.13	0.917315	11.9444	39.7195	0.190698	0.52	16.18		6.33			5.75	2.34	0.15	1.47	3.4	0.12		28	16		116			13	3	50	58	16		41	215	18	100	3.2	1.4	266	11
2005	[8431] LINDSAY J. M.(2005) [GeoReM [1589] ]	LESSER ANTILLES / LESSER ANTILLES / DOMINICA / PLAT PAYS VOLCANIC COMPLEX//	-61.3	15.29	24.42	VOLCANIC ROCK	DACITE			NEOGENE		63.03	0.935076	12.1667	39.5584	0.173516	0.52	16.59		6.4			5.87	2.35	0.15	1.44	3.35	0.12		25	15					13	4	24	59	17		38	219	18	101	3	2	261	11
2005	[8431] LINDSAY J. M.(2005) [GeoReM [1589] ]	LESSER ANTILLES / LESSER ANTILLES / DOMINICA / PLAT PAYS//	-61.36	15.24	24.42	VOLCANIC ROCK	ANDESITE			NEOGENE		62.1	0.944018	12.3529	42.4443	0.204762	0.5	16.51	6.15				5.84	2.29	0.14	1.5	3.19	0.12		19	14		104			14	5	11	59	16		43	210	17	95	3.1	2.5	266	11
2005	[8431] LINDSAY J. M.(2005) [GeoReM [1589] ]	LESSER ANTILLES / LESSER ANTILLES / DOMINICA / WOTTEN WAVEN/MICROTIN/	-61.3	15.35	24.42	VOLCANIC ROCK	ANDESITE			NEOGENE		60.69	0.906821	12.8824	44.2367	0.146119	0.6	17.03	7.19				6.69	2.88	0.16	1.28	3.18	0.12		23	19		141			17	7	52	56	17		32	219	17	90	2.9	1.6	248	9.9
2005	[8431] LINDSAY J. M.(2005) [GeoReM [1589] ]	LESSER ANTILLES / LESSER ANTILLES / DOMINICA / WOTTON WAVEN/MICROTIN/	-61.3	15.35	24.42	VOLCANIC ROCK	ANDESITE			NEOGENE		62.09	0.927079	11.2105	43.3576	0.169014	0.54	16.78	6.52				6.16	2.52	0.15	1.39	3.28	0.12					119						55			36	213	19	95			252
2010	[13695] MAMANI M. (2010)	ANDEAN ARC / CENTRAL ANDEAN VOLCANIC ZONE / PERU / HUAYLILLAS FORMATION//	-70.4536	-15.1433	68.73	PLUTONIC ROCK	GRANODIORITE			MIOCENE		64.95	0.963371	11.7241	42.7587	0.179412	0.72	15.24	5.17		0		3.29	1.95	0.12	4.18	3.23	0.34	0.74	15.7061	25		214	9		19	4	46	82	20		61	340	29	149	7	1.12527	564	18.0816
2004	[13697] MAMANI M. (2004)	ANDEAN ARC / CENTRAL ANDEAN VOLCANIC ZONE / PERU / HUAYLILLAS FORMATION//	-70.736	-15.051	68.73	PLUTONIC ROCK	GRANODIORITE			MIOCENE		65.21	0.963204	23.45	44.0349	0.138593	0.62	15.99	4.43				3.1	1.76	0.02	3.99	4.04	0.22	0.61		24		173	101		24	34	56	76	18		65	469	20	137	7.8	1.9	362	21
2014	[19018] GALAS A. (2014)	ANDEAN ARC / CENTRAL ANDEAN VOLCANIC ZONE / PERU / ANDAGUA (ANDAHUA) VOLCANIC FIELD//	-71.9879	-15.5754	65.66	VOLCANIC ROCK	TRACHYANDESITE			QUATERNARY		59.78	0.801941	90	43.8415	0.0623932	1.18	16.76	6.19				5.3	2.44	0.07	3.05	4.84	0.59	0				141	30								73	1170	13	234	19		1412	76.4
2010	[13695] MAMANI M. (2010)	ANDEAN ARC / CENTRAL ANDEAN VOLCANIC ZONE / PERU / BARROSO FORMATION//	-71.5575	-15.539	65.66	VOLCANIC ROCK	ANDESITE			MIOCENE		58.5	0.761469	39.2778	38.8744	0.0381895	0.703	17.7	4.64				6.66	1.49	0.17	1.99	5.46	0.219		9.25898	19		175	10		20	11	78	88	22		27	707	18	163	6	1.0185	598	33.7618
2010	[13695] MAMANI M. (2010)	ANDEAN ARC / CENTRAL ANDEAN VOLCANIC ZONE / PERU / BARROSO FORMATION//	-71.2611	-15.0476	65.66	VOLCANIC ROCK	ANDESITE			MIOCENE		60.7	0.846555	62.2105	37.1975	0.0456853	0.932	15.8	5.35				4.51	1.6	0.048	3.33	4.17	0.392		12.1802	19		181	77		27	45	57	89	21		54	1182	19	194	9	0.984603	1066	54.8386
2010	[13695] MAMANI M. (2010)	ANDEAN ARC / CENTRAL ANDEAN VOLCANIC ZONE / PERU / BARROSO FORMATION//	-71.7688	-15.8741	65.66	VOLCANIC ROCK	DACITE			NEOGENE		65.9	0.965117	40.5263	22.921	0.038961	0.689	16.1	3.33				2.68	0.5	0.055	4.74	4.06	0.187		25.215	20		211	160		28	86	76	103	21		30	770	19	154	3	2.38065	570	20.1952
2004	[12577] GERBE M. C. (2004)	ANDEAN ARC / CENTRAL ANDEAN VOLCANIC ZONE / PERU / SABANCAYA//	-71.85	-15.7972	65.66	VOLCANIC ROCK	ANDESITE			HOLOCENE	1994	61.87	0.770723	57.6667	43.0161	0.0914579	1.02	15.53		6.21			5.42	2.63	0.08	2.84	4.39		0.05		9.22		143	41			25			21.9		71.2	778.5	13.5	188.8	7.4		941.6	36.9
2004	[12577] GERBE M. C. (2004)	ANDEAN ARC / CENTRAL ANDEAN VOLCANIC ZONE / PERU / SABANCAYA//	-71.85	-15.7972	65.66	VOLCANIC ROCK	ANDESITE			HOLOCENE	1996	61.9	0.901222	51.5357	44.5491	0.10991	0.94	16.37		5.48			4.85	2.47	0.07	2.89	3.78	0.28	0.03		8.2		124	32			21			21.3		79.3	721.5	14	181.2	7.1		941.9	32.1
2004	[12577] GERBE M. C. (2004)	ANDEAN ARC / CENTRAL ANDEAN VOLCANIC ZONE / PERU / SABANCAYA//	-71.85	-15.78	65.66	VOLCANIC ROCK	DACITE			HOLOCENE	1990	63.1	0.810406	45.5235	44.652	0.12782	0.87	15.3		5.17			4.63	2.34	0.07	3.13	4.3		0.12		8.74		127	41			21			19.8		86.7	678.3	14.9	205.2	8		919.6	37.3
2004	[12577] GERBE M. C. (2004)	ANDEAN ARC / CENTRAL ANDEAN VOLCANIC ZONE / PERU / SABANCAYA//	-71.85	-15.78	65.66	VOLCANIC ROCK	ANDESITE			HOLOCENE	1994	62.36	0.806437	57.391	44.0205	0.0985196	1.04	15.52		6.12			5.23	2.7	0.08	2.84	4.05		0.09		8.95		138	40			26			21.2		75.2	763.3	13.3	183.2	7.3		953	33.6
2004	[12577] GERBE M. C. (2004)	ANDEAN ARC / CENTRAL ANDEAN VOLCANIC ZONE / PERU / SABANCAYA//	-71.85	-15.78	65.66	VOLCANIC ROCK	ANDESITE			HOLOCENE	1994	61.78	0.774998	56.0602	43.5173	0.104077	0.97	15.54		5.83			5.27	2.52	0.07	2.91	4.45		0.1								18			21.6		77.6	745.6	13.3	193.6	7.2		963.1	34.3
2004	[12577] GERBE M. C. (2004)	ANDEAN ARC / CENTRAL ANDEAN VOLCANIC ZONE / PERU / SABANCAYA//	-71.85	-15.78	65.66	VOLCANIC ROCK	ANDESITE			HOLOCENE	1994	62.33	0.814577	56.3259	44.015	0.100999	1	15.75		5.94			5.21	2.62	0.08	2.82	4.14		0.08								17			21.8		76.8	760.4	13.5	186	7.6		951.1
2004	[12577] GERBE M. C. (2004)	ANDEAN ARC / CENTRAL ANDEAN VOLCANIC ZONE / PERU / SABANCAYA//	-71.85	-15.78	65.66	VOLCANIC ROCK	ANDESITE			HOLOCENE	1995	62.29	0.842983	54.7465	44.2133	0.0918446	0.97	16.1		5.69			4.95	2.53	0.07	2.78	4.31		0		8.835		145	38			23			20.8		71.4	777.4	14.2	188.1	6.9		929.7	36.4
2004	[12577] GERBE M. C. (2004)	ANDEAN ARC / CENTRAL ANDEAN VOLCANIC ZONE / PERU / SABANCAYA//	-71.85	-15.78	65.66	VOLCANIC ROCK	ANDESITE			HOLOCENE	1997	61.63	0.872385	51.0966	43.7905	0.106222	1	16.41		5.88			5.09	2.57	0.07	2.78	3.98	0.32	0		8.14		136	37			23			21.1		78.7	740.9	14.5	180.7	6.6		925.7	31.1
2004	[12577] GERBE M. C. (2004)	ANDEAN ARC / CENTRAL ANDEAN VOLCANIC ZONE / PERU / SABANCAYA//	-71.85	-15.78	65.66	VOLCANIC ROCK	ANDESITE			HOLOCENE	1997	62.02	0.878274	50.9714	44.1268	0.113649	0.98	16.39		5.71			5.03	2.53	0.07	2.88	3.89	0.31	0		7.99		137	37			22			20.6		81.1	713.6	14	192.7	7.8		912.7	30.6
2004	[12577] GERBE M. C. (2004)	ANDEAN ARC / CENTRAL ANDEAN VOLCANIC ZONE / PERU / SABANCAYA//	-71.85	-15.78	65.66	VOLCANIC ROCK	NOT GIVEN			HOLOCENE	1992	57.7	0.740228	64.6096	44.7774	0.0436765	1.35	16.6		7.43			6.71	3.38	0.08	2.35	4.67		0		10.36		181	46			36			21.4		41.2	943.3	14.6	198.6	5.8		886.8	33.9
2020	[23780] RIVERA M. (2020)	ANDEAN ARC / CENTRAL ANDEAN VOLCANIC ZONE / PERU / YUCAMANE-CALIENTES//	-71.8783	-15.8217	65.66	VOLCANIC ROCK	NOT GIVEN			HOLOCENE		60.2	0.91961	39.875	44.1356	0.139498	0.7	16.7	5.54				4.95	2.21	0.09	2.87	3.68	0.23	1.47		10		110	6.9		14.1	7					89	638	16	134	9.5		962	32
2020	[23780] RIVERA M. (2020)	ANDEAN ARC / CENTRAL ANDEAN VOLCANIC ZONE / PERU / YUCAMANE-CALIENTES//	-71.8783	-15.8217	65.66	VOLCANIC ROCK	NOT GIVEN			HOLOCENE		65.7	0.987814	36.5116	43.4402	0.220807	0.53	14.9	4.1				3.63	1.59	0.07	3.37	2.94	0.21	2.4		6.8		81	9.4		11.2	7					104	471	12.9	58.8	7.9		865	34
2020	[23780] RIVERA M. (2020)	ANDEAN ARC / CENTRAL ANDEAN VOLCANIC ZONE / PERU / YUCAMANE-CALIENTES//	-71.8783	-15.8217	65.66	VOLCANIC ROCK	NOT GIVEN			HOLOCENE		60.7	0.870054	45.3797	43.4334	0.103208	0.92	17	6.99				5.8	2.71	0.11	2.61	3.75	0.31	0.6		11.7		154	5.1		18	4.9					74	717	15.8	110	8.2		900	31
2020	[23780] RIVERA M. (2020)	ANDEAN ARC / CENTRAL ANDEAN VOLCANIC ZONE / PERU / YUCAMANE-CALIENTES//	-71.8783	-15.8217	65.66	VOLCANIC ROCK	NOT GIVEN			HOLOCENE		58.3	0.870977	46.7429	43.5522	0.0611247	0.99	18.6	7.29				6.91	2.84	0.11	2.15	3.93	0.31	-0.19		13.9		163	6.4		19.8	8.6					50	818	17.5	133	8.5		841	28
2020	[23780] RIVERA M. (2020)	ANDEAN ARC / CENTRAL ANDEAN VOLCANIC ZONE / PERU / YUCAMANE-CALIENTES//	-71.8783	-15.8217	65.66	VOLCANIC ROCK	NOT GIVEN			HOLOCENE		57.1	0.874221	50.0592	41.3102	0.0531915	1	17.8	7.4				6.38	2.63	0.11	2	4.01	0.35	0.41		11.5		153	4.6		24	3.7					45	846	16.9	169.3	8.2		914	28
2020	[23780] RIVERA M. (2020)	ANDEAN ARC / CENTRAL ANDEAN VOLCANIC ZONE / PERU / YUCAMANE-CALIENTES//	-71.8783	-15.8217	65.66	VOLCANIC ROCK	NOT GIVEN			HOLOCENE		62.8	0.918028	50.4478	42.0797	0.122781	0.85	16.5	5.97				4.76	2.19	0.09	2.88	3.77	0.3	1.01		8.4		117	8.9		22.7	6.8					83	676	13.4	146	9.5		1045	35
2010	[13695] MAMANI M. (2010)	ANDEAN ARC / CENTRAL ANDEAN VOLCANIC ZONE / PERU / ANDAGUA (ANDAHUA) VOLCANIC FIELD//	-72.3167	-15.533	47.78	VOLCANIC ROCK	DACITE			QUATERNARY		67.3	0.92259	56.9091	39.2027	0.119808	0.588	15.2	3.44				2.88	1.12	0.045	4.35	3.97	0.219		26.5995	6		78.7129			9.23902	15	40	78	21		75	626	11	202	7	1.60428	778	24.2391
2010	[13695] MAMANI M. (2010)	ANDEAN ARC / CENTRAL ANDEAN VOLCANIC ZONE / PERU / ANDAGUA (ANDAHUA) VOLCANIC FIELD//	-72.3453	-15.4314	47.78	VOLCANIC ROCK	ANDESITE			QUATERNARY		59.3	0.811912	57	44.5338	0.110048	1.167	16.8	6.29				5.34	2.55	0.083	2.7	4.9	0.493		26.1307	8		78.5185			9.39173	14	53	63	19		69	627	11	215	7	1.44	776	25.1491
2014	[19018] GALAS A. (2014)	ANDEAN ARC / CENTRAL ANDEAN VOLCANIC ZONE / PERU / ANDAGUA (ANDAHUA) VOLCANIC FIELD//	-72.4608	-15.2585	47.78	VOLCANIC ROCK	TRACHYANDESITE			QUATERNARY		59.51	0.818734	84.1538	43.4917	0.0457038	1.3	16.96	6.15				5.16	2.39	0.07	3.13	4.83	0.65	0.61				151	20								50	1094	13	282	31		1413	56
2014	[19018] GALAS A. (2014)	ANDEAN ARC / CENTRAL ANDEAN VOLCANIC ZONE / PERU / ANDAGUA (ANDAHUA) VOLCANIC FIELD//	-72.434	-15.3197	47.78	VOLCANIC ROCK	TRACHYANDESITE			QUATERNARY		58.5	0.7941	96.3333	43.7715	0.0441176	1.3	16.88	6.92				5.9	2.72	0.08	2.57	4.71	0.61	0.33				167	30								51	1156	12	200	11		1286	59
2014	[19018] GALAS A. (2014)	ANDEAN ARC / CENTRAL ANDEAN VOLCANIC ZONE / PERU / ANDAGUA (ANDAHUA) VOLCANIC FIELD//	-72.3362	-15.4564	47.78	VOLCANIC ROCK	ANDESITE			QUATERNARY		61.76	0.802285	70.2308	44.899	0.101862	1	15.9	5.42				4.66	2.23	0.08	3.02	4.91	0.47	0.21				124	30								93	913	13	231	36		1282	60.3
2014	[19018] GALAS A. (2014)	ANDEAN ARC / CENTRAL ANDEAN VOLCANIC ZONE / PERU / ANDAGUA (ANDAHUA) VOLCANIC FIELD//	-72.3667	-15.4987	47.78	VOLCANIC ROCK	TRACHYANDESITE			QUATERNARY		57.79	0.803077	95.8182	44.5164	0.0417457	1.27	16.93	6.64				6.08	2.69	0.08	2.44	4.49	0.51	0.56				141	40								44	1054	11	165	11		1126	39.9
2014	[19018] GALAS A. (2014)	ANDEAN ARC / CENTRAL ANDEAN VOLCANIC ZONE / PERU / ANDAGUA (ANDAHUA) VOLCANIC FIELD//	-72.3388	-15.5251	47.78	VOLCANIC ROCK	TRACHYANDESITE			QUATERNARY		58.83	0.789605	106.083	43.2928	0.0510605	1.14	16.75	6.2				5.4	2.39	0.07	3.02	4.94	0.64	0.2				141	30								65	1273	12	234	18		1628	74.1
2014	[19018] GALAS A. (2014)	ANDEAN ARC / CENTRAL ANDEAN VOLCANIC ZONE / PERU / ANDAGUA (ANDAHUA) VOLCANIC FIELD//	-72.0742	-15.4744	47.78	VOLCANIC ROCK	DACITE			QUATERNARY		67	0.904141	54.5556	42.1272	0.287169	0.53	14.73	3.02				2.89	1.11	0.05	3.51	4.4	0.2	1.33				67									141	491	9	159	22		906	35.8
2014	[19018] GALAS A. (2014)	ANDEAN ARC / CENTRAL ANDEAN VOLCANIC ZONE / PERU / ANDAGUA (ANDAHUA) VOLCANIC FIELD//	-72.06	-15.474	47.78	VOLCANIC ROCK	TRACHYANDESITE			QUATERNARY		59.6	0.785516	94.25	44.4307	0.0592396	1.19	16.65	5.92				5.29	2.39	0.07	2.87	5.15	0.58	0.27				141	20								67	1131	12	253	22		1423	61
2014	[19018] GALAS A. (2014)	ANDEAN ARC / CENTRAL ANDEAN VOLCANIC ZONE / PERU / ANDAGUA (ANDAHUA) VOLCANIC FIELD//	-72.0006	-15.6178	47.78	VOLCANIC ROCK	TRACHYANDESITE			QUATERNARY		57.35	0.774606	98	42.7632	0.0408163	1.36	16.36	6.68				5.78	2.52	0.08	2.6	4.74	0.71	-0.01				159	30								56	1372	14	202	12		1267	70.6
2014	[19018] GALAS A. (2014)	ANDEAN ARC / CENTRAL ANDEAN VOLCANIC ZONE / PERU / ANDAGUA (ANDAHUA) VOLCANIC FIELD//	-72.1668	-15.6347	47.78	VOLCANIC ROCK	TRACHYANDESITE			QUATERNARY		57.41	0.788519	83.9167	43.478	0.0883813	0.97	15.82	5.69				5.18	2.21	0.07	2.95	4.53	0.48	0.18				134	40								89	1007	12	194	13		1274	58
2014	[19018] GALAS A. (2014)	ANDEAN ARC / CENTRAL ANDEAN VOLCANIC ZONE / PERU / ANDAGUA (ANDAHUA) VOLCANIC FIELD//	-72.1409	-15.8348	47.78	VOLCANIC ROCK	TRACHYANDESITE, BASALTIC			QUATERNARY		57.66	0.768418	96.7692	43.7936	0.0492846	1.27	16.73	6.38				5.52	2.51	0.08	2.97	5.18	0.66	0.49				149	30								62	1258	13	269	24		1536	65.9
2014	[19018] GALAS A. (2014)	ANDEAN ARC / CENTRAL ANDEAN VOLCANIC ZONE / PERU / ANDAGUA (ANDAHUA) VOLCANIC FIELD//	-72.1726	-15.8814	47.78	VOLCANIC ROCK	TRACHYANDESITE, BASALTIC			QUATERNARY		58.89	0.750072	96.5833	44.3293	0.0534944	1.15	16.54	5.82				5.8	2.34	0.07	2.94	5.06	0.59	1.7				136	20								62	1159	12	263	17		1466	62
2010	[13695] MAMANI M. (2010)	ANDEAN ARC / CENTRAL ANDEAN VOLCANIC ZONE / PERU / BARROSO FORMATION//	-72.6932	-15.0586	47.78	VOLCANIC ROCK	ANDESITE			PLIOCENE		60.9	0.822425	32.8667	44.4471	0.279919	1.006	16.5	5.52				4.36	2.23	0.07	3.4	5.14	0.522					71	11		9	7	25	62			138	493	15	162	9		903
2010	[13695] MAMANI M. (2010)	ANDEAN ARC / CENTRAL ANDEAN VOLCANIC ZONE / PERU / BARROSO FORMATION//	-72.7475	-15.6144	47.78	VOLCANIC ROCK	ANDESITE			MIOCENE		56.5	0.83332	32.5	44.6284	0.0569231	0.949	17.6	7.47				6.39	3.04	0.122	2.32	4.25	0.38		7.54367	20		205	34		24	27	81	94	22		37	650	20	179	9	1.15628	587	29.8529
2010	[13695] MAMANI M. (2010)	ANDEAN ARC / CENTRAL ANDEAN VOLCANIC ZONE / PERU / COROPUNA//	-72.7472	-15.4944	47.78	VOLCANIC ROCK	ANDESITE			PLIOCENE		63.3	0.865036	24.6	43.8931	0.213415	0.85	16.1	4.81				4.14	1.9	0.064	3.25	4.6	0.324					118	50		23	13	19	78			105	492	20	163	11		647
2010	[13695] MAMANI M. (2010)	ANDEAN ARC / CENTRAL ANDEAN VOLCANIC ZONE / PERU / COROPUNA//	-72.5589	-15.5144	47.78	VOLCANIC ROCK	ANDESITE			PLIOCENE		62.3	0.844044	89.7143	44.2025	0.0613057	0.978	16.2	5.25				4.45	2.1	0.067	3.16	4.67	0.396		16.935	4.501		89	29		15	17	25	101			77	1256	14	240	11	1.77215	1561	46.1066
2010	[13695] MAMANI M. (2010)	ANDEAN ARC / CENTRAL ANDEAN VOLCANIC ZONE / PERU / COROPUNA//	-72.5314	-15.5147	47.78	VOLCANIC ROCK	ANDESITE			PLIOCENE		60.4	0.836496	74.4444	44.0911	0.0253731	1.02	16.8	5.55				4.68	2.21	0.073	3.11	4.99	0.476		10.0834	9.8033		141	64		18	28	31	125			34	1340	18	288	13	0.770558	1338	45.9959
2010	[13695] MAMANI M. (2010)	ANDEAN ARC / CENTRAL ANDEAN VOLCANIC ZONE / PERU / HUAYLILLAS FORMATION//	-72.7183	-15.0786	47.78	VOLCANIC ROCK	DACITE			MIOCENE		66.7	0.915334	48.875	34.2253	0.0396419	0.653	15.6	3.73				2.64	0.98	0.088	4.7	4.35	0.225		12.1558	22		189	47		24	24	85	75	19		31	782	16	133	4	0.613022	847	25.5591
2010	[13695] MAMANI M. (2010)	ANDEAN ARC / CENTRAL ANDEAN VOLCANIC ZONE / CHILE / BARROSO-CAPILLUNE IGNIMBRITE//	-73.0569	-15.3728	57.93	VOLCANIC ROCK	DACITE			PLIOCENE		64.2	0.939154	50.0026	41.2888	0.187882	0.682	15.6	3.83		0		3.28	1.36	0.054	3.18	4.38	0.27			8		138	18		16	15	104	109	21.903		218.227	1161.51	23.229	276.81	18.819	7.9	869.2	38.57
2010	[13695] MAMANI M. (2010)	ANDEAN ARC / CENTRAL ANDEAN VOLCANIC ZONE / CHILE / BARROSO-CAPILLUNE IGNIMBRITE//	-73.0024	-15.4852	57.93	VOLCANIC ROCK	ANDESITE			PLIOCENE		61.95	0.957978	21.4179	44.5016	0.373985	0.71	15.33	4.1		0		3.22	1.66	0.059	3.19	4.07	0.279					21.7988	7.2619		2.7453	1.6676	4.3835	33.9457	22.4512		151.421	404.886	18.9041	124.824	17.8054	6.5001	652.139	35.9348
2010	[13695] MAMANI M. (2010)	ANDEAN ARC / CENTRAL ANDEAN VOLCANIC ZONE / PERU / OCONA / BARROSO-SENCCA IGNIMBRITE/	-73.0912	-15.6466	57.93	VOLCANIC ROCK	RHYOLITE			NEOGENE		64.85	0.770546	37.2308	29.7464	0.237603	0.295	12.68	1.45		0		2.79	0.31	0.066	4.24	4.13	0.051		12.9	7		56	3		7	4	11	70	18		115	484	13	231	12	2.55	1124	20.9
2010	[13695] MAMANI M. (2010)	ANDEAN ARC / CENTRAL ANDEAN VOLCANIC ZONE / PERU / OCONA//	-73.0842	-15.5689	57.93	VOLCANIC ROCK	RHYOLITE			PLIOCENE		66.6	0.933871	64	39.7649	0.294271	0.521	14.8	3.12				2.72	1.04	0.064	3.72	4.18	0.184		11.8669	3		26	8		2	2.21556	6.52478	48	18		113	384	6	178	10	3.65989	1048	26.7351
2010	[13695] MAMANI M. (2010)	ANDEAN ARC / CENTRAL ANDEAN VOLCANIC ZONE / PERU / YARIHUATO / HUAYLILLAS FORMATION/	-73.4603	-15.5075	57.93	VOLCANIC ROCK	ANDESITE			MIOCENE		61.6	0.910871	63.5333	39.6733	0.0377754	0.768	17	5.24				4.25	1.74	0.123	3.28	4.49	0.375		8.84373	10		164	62		22	44	94	87	23		36	953	15	142	7	1.03852	682	30.0437
2010	[13695] MAMANI M. (2010)	ANDEAN ARC / CENTRAL ANDEAN VOLCANIC ZONE / PERU///	-73.0617	-15.3536	57.93	VOLCANIC ROCK	DACITE			QUATERNARY		66.4	0.925679	51.5714	41.2462	0.0387812	0.588	15.7	3.47				3.17	1.23	0.053	3.46	4.53	0.249		13.0458	11.8801		125	26		20	8	33	80			28	722	14	119	4	0.592781	736	15.1963
2010	[13695] MAMANI M. (2010)	ANDEAN ARC / CENTRAL ANDEAN VOLCANIC ZONE / PERU///	-73.0569	-15.3728	57.93	VOLCANIC ROCK	DACITE			QUATERNARY		67.4	0.9266	73.3636	40.7353	0.0247831	0.576	15.7	3.4				3.02	1.18	0.052	3.59	4.6	0.243		12.4934	11.1781		114	16		17	18	45	74			20	807	11	130	4	0.507872	585	12.4047
2010	[13695] MAMANI M. (2010)	ANDEAN ARC / CENTRAL ANDEAN VOLCANIC ZONE / PERU///	-73.0719	-15.3764	57.93	VOLCANIC ROCK	DACITE			QUATERNARY		67.3	0.966607	42.8462	37.971	0.129264	0.584	16.1	3.3				2.89	1.02	0.048	3.33	4.74	0.24		7.93755	7.9858		82	53		13	21	33	58			72	557	13	151	6	1.82186	921	13.5025
2000	[4255] MURPHY M. D. (2000)	LESSER ANTILLES / LESSER ANTILLES / MONTSERRAT / SOUFRIERE HILLS//	-62.18	16.72	18.15	VOLCANIC ROCK	ANDESITE	350		QUATERNARY		59.49	0.83771	12.7619	38.4484	0.0708955	0.59	17.2		7.79			7.68	2.73	0.18	0.78	3.48	0.14	0.01		15		111	0			2					19	268	21	89			193
2000	[4255] MURPHY M. D. (2000)	LESSER ANTILLES / LESSER ANTILLES / MONTSERRAT / SOUFRIERE HILLS//	-62.18	16.72	18.15	VOLCANIC ROCK	NOT GIVEN	0.00037		QUATERNARY		63.04	0.93819	12.0952	40.7426	0.0748031	0.55	17.39		6.17			6.57	2.38	0.16	0.8	3.48	0.14	0.11		31						3					19	254	21	111			274
2000	[4255] MURPHY M. D. (2000)	LESSER ANTILLES / LESSER ANTILLES / MONTSERRAT / SOUFRIERE HILLS//	-62.18	16.72	18.15	VOLCANIC ROCK	NOT GIVEN	0.00018		QUATERNARY		63.42	0.904917	12.2	41.2142	0.0778689	0.55	16.57		6			6.24	2.36	0.16	1.01	3.57	0.14	0.28		30											19	244	20	109			273
2010	[13695] MAMANI M. (2010)	ANDEAN ARC / CENTRAL ANDEAN VOLCANIC ZONE / PERU / TICSANI//	-70.645	-16.7317	60.69	VOLCANIC ROCK	DACITE			QUATERNARY		63.2	0.956834	65.0625	42.9021	0.0268972	0.712	16.3	4.27				3.61	1.62	0.059	3.17	4.28	0.236		13.9134	16		193	60		26	36	64	137	25		28	1041	16	189	6	0.288368	897	57.2884
2010	[13695] MAMANI M. (2010)	ANDEAN ARC / CENTRAL ANDEAN VOLCANIC ZONE / PERU / TICSANI//	-70.6078	-16.7319	60.69	VOLCANIC ROCK	ANDESITE			QUATERNARY		62.9	0.973357	38.7222	43.616	0.0401722	0.698	16.3	4.25				3.62	1.66	0.056	3.19	4.08	0.227		7.74497	15		138	9		18	8	45	81	20		28	697	18	133	9	0.686303	619	23.5304
2010	[13695] MAMANI M. (2010)	ANDEAN ARC / CENTRAL ANDEAN VOLCANIC ZONE / PERU / TICSANI//	-70.6094	-16.7414	60.69	VOLCANIC ROCK	DACITE			QUATERNARY		65.4	0.927253	28.8824	43.3522	0.12831	0.678	16	4.27				3.62	1.65	0.06	3.25	4.35	0.214		8.95292	12		122	8		8	3	20	72	20		63	491	17	187	8	0.387799	792	29.4087
2010	[13695] MAMANI M. (2010)	ANDEAN ARC / CENTRAL ANDEAN VOLCANIC ZONE / PERU / TICSANI//	-70.6097	-16.7892	60.69	VOLCANIC ROCK	DACITE			QUATERNARY		65.1	0.931271	61.6111	44.7779	0.0423805	0.629	15.9	4.03				3.58	1.65	0.059	3.21	4.31	0.195		12.5717	11		148	50		20	33	53	111	23		47	1109	18	250	11	0.524419	1318	69.3722
2010	[13695] MAMANI M. (2010)	ANDEAN ARC / CENTRAL ANDEAN VOLCANIC ZONE / PERU / TICSANI//	-70.6186	-16.7922	60.69	VOLCANIC ROCK	DACITE			QUATERNARY		64.5	0.959101	83.2143	44.8637	0.0592275	0.611	16.3	3.87				3.56	1.59	0.057	3.08	4.37	0.187		14.8563	8		131	44		16	30	65	109	24		69	1165	14	257	9	0.749575	1463	76.2306
2010	[13695] MAMANI M. (2010)	ANDEAN ARC / CENTRAL ANDEAN VOLCANIC ZONE / PERU / TICSANI//	-70.5922	-16.7625	60.69	VOLCANIC ROCK	DACITE			QUATERNARY		65.5	0.937055	24.0909	42.8233	0.183019	0.665	16	3.94				3.38	1.49	0.056	3.38	4.42	0.223		17.1537	29		253	226		33	55	102	62	16		97	530	22	100	6	4.93866	724	18.1771
2010	[13695] MAMANI M. (2010)	ANDEAN ARC / CENTRAL ANDEAN VOLCANIC ZONE / PERU / TICSANI//	-70.6097	-16.7892	60.69	VOLCANIC ROCK	DACITE			QUATERNARY		65.2	0.933295	23	44.2642	0.246377	0.627	16	3.99				3.6	1.6	0.058	3.15	4.37	0.199		11.3122	15		147	25		19	16	36	71	19		102	414	18	161	8	4.07478	478	20.7407
2010	[13695] MAMANI M. (2010)	ANDEAN ARC / CENTRAL ANDEAN VOLCANIC ZONE / PERU / BARROSO FORMATION//	-71.2736	-16.1992	39.75	VOLCANIC ROCK	ANDESITE			NEOGENE		56.4	0.844243	49.1053	41.7418	0.0546624	1.295	17	8.32				6.01	3.01	0.126	2.49	3.96	0.368		23.8981	18		179	106		27	59	58	103	20		51	933	19	234	20	12.2896	1001	59.746
2010	[13695] MAMANI M. (2010)	ANDEAN ARC / CENTRAL ANDEAN VOLCANIC ZONE / PERU / BARROSO FORMATION//	-71.3948	-16.0006	39.75	VOLCANIC ROCK	DACITE			NEOGENE		64.3	0.935855	27.8182	38.5401	0.153595	0.677	17	4.39		0		3.86	1.39	0.102	3.11	4.73	0.281			9.8		102	3.4		13.1	5					94	612	22	150	11	5.36	664	27.1
2010	[13695] MAMANI M. (2010)	ANDEAN ARC / CENTRAL ANDEAN VOLCANIC ZONE / PERU / BARROSO FORMATION//	-71.1496	-16.3356	39.75	VOLCANIC ROCK	ANDESITE			NEOGENE		60	0.889699	26.7059	41.3836	0.209251	0.848	17.1	6.48		0		5.47	2.31	0.09	2.52	3.98	0.244			11.88		124	20.2		13.8	9					95	454	17	121	8	3	583	26.9
2010	[13695] MAMANI M. (2010)	ANDEAN ARC / CENTRAL ANDEAN VOLCANIC ZONE / PERU / CHACHANI / BARROSO FORMATION/	-71.6167	-16.2683	39.75	VOLCANIC ROCK	ANDESITE			PLIOCENE		58.02	0.901471	39.9535	41.8247	0.0748948	0.973	18.25	5.84		0		5.52	2.12	0.082	2.79	4.37	0.331			19.93		222.624	393.9		38.4	126.922	133.2	92.723	17.644		50.956	680.368	17.029	110.11	5.841	3.8	645.2	23.956
2010	[13695] MAMANI M. (2010)	ANDEAN ARC / CENTRAL ANDEAN VOLCANIC ZONE / PERU / CHACHANI / BARROSO FORMATION/	-71.5081	-16.2678	39.75	VOLCANIC ROCK	ANDESITE			PLIOCENE		58.69	0.878898	78.0613	43.0262	0.029136	0.958	17.4	6.53		0		5.34	2.49	0.091	2.74	4.33	0.333			24		301	140		44	44	111	94	17.319		42.77	1467.94	18.805	99.379	6.687	2.9	1734.4	24.767
2010	[13695] MAMANI M. (2010)	ANDEAN ARC / CENTRAL ANDEAN VOLCANIC ZONE / PERU / CHACHANI / BARROSO FORMATION/	-71.6	-16.25	39.75	VOLCANIC ROCK	ANDESITE			PLIOCENE		58.9	0.879901	61.6471	41.2617	0.0353053	0.987	17.6	6.71		0		5.5	2.38	0.097	2.63	4.35	0.341			12.6		103	9.7		17	4					37	1048	17	127	9	0.6	567	23.8
2010	[13695] MAMANI M. (2010)	ANDEAN ARC / CENTRAL ANDEAN VOLCANIC ZONE / PERU / CHACHANI / BARROSO-SENCCA IGNIMBRITE/	-71.6	-16.25	39.75	VOLCANIC ROCK	RHYOLITE			PLIOCENE		59.7	0.910505	24.0952	41.0709	0.128458	0.766	17.9	6.28		0		5.23	2.21	0.096	2.63	4.44	0.332			19.83		176	47		41.6	11					65	506	21	90	7		683	19.2
2010	[13695] MAMANI M. (2010)	ANDEAN ARC / CENTRAL ANDEAN VOLCANIC ZONE / PERU / PICHUPICHU / BARROSO FORMATION/	-71.1976	-16.4873	39.75	VOLCANIC ROCK	ANDESITE			NEOGENE		60.1	0.891296	32.2381	44.5142	0.103397	0.733	17.9	5.9				5.79	2.39	0.098	2.02	4.48	0.281		14.1963	20		175	62		22	40	71	93	22		70	677	21	195	8	1.85474	1370	52.5975
2010	[13695] MAMANI M. (2010)	ANDEAN ARC / CENTRAL ANDEAN VOLCANIC ZONE / PERU / PICHUPICHU / BARROSO FORMATION/	-71.1652	-16.4319	39.75	VOLCANIC ROCK	ANDESITE			NEOGENE		60.2	0.922719	46.15	42.3664	0.0769231	0.66	17.9	5.55		0		5.35	2.06	0.085	2.34	4.34	0.274			15.7		141	102		21.3	64					71	923	20	150	9	4.37	727	30.8
2010	[13695] MAMANI M. (2010)	ANDEAN ARC / CENTRAL ANDEAN VOLCANIC ZONE / PERU / PICHUPICHU / HUAYLILLAS FORMATION/	-71.2014	-16.4981	39.75	VOLCANIC ROCK	ANDESITE			NEOGENE		61.2	0.868635	76	44.2645	0.0466507	0.854	16.2	5.96				4.84	2.39	0.092	2.93	4.06	0.276		13.5613	11		164	70		22	45	99	84	23		39	836	11	140	5	1.3705	874	26.8374
2000	[8763] TALAVERA MENDOZA O. (2000)	NORTH AMERICAN CORDILLERA - MESOZOIC / CORDILLERA MEXICO / GUERRERO / HUETAMO SEQUENCE//	-101.55	17.63	19.06	VOLCANIC ROCK	ANDESITE			MIOCENE		59.7	0.807193	17.3684	36.3481	0.112948	0.81	14.71	7.63				3.72	2.2	0.12	3.08	4.94	0.35	2.28				284	5		24	11					41	363	20.9	75	0		1564	10.93
2000	[8763] TALAVERA MENDOZA O. (2000)	NORTH AMERICAN CORDILLERA - MESOZOIC / CORDILLERA MEXICO / GUERRERO / HUETAMO SEQUENCE//	-101.55	17.63	19.06	VOLCANIC ROCK	ANDESITE			MIOCENE		62.21	0.883	26.9898	39.7073	0.0699433	0.77	13.21	8.33				3.25	2.77	0.14	2.42	3.91	0.32	2.34				254	10		20	14					37	529	19.6	70	0		1416	10.27
2000	[8763] TALAVERA MENDOZA O. (2000)	NORTH AMERICAN CORDILLERA - MESOZOIC / CORDILLERA MEXICO / GUERRERO / HUETAMO SEQUENCE//	-101.55	17.63	19.06	VOLCANIC ROCK	ANDESITE			MIOCENE		61.42	0.93053	30.3977	25.1916	0.035514	0.55	17.1	5.94				4.51	1.01	0.08	1.18	5.41	0.2	2.26				177	20		12	9					19	535	17.6	75	0		584	11.28
2000	[8763] TALAVERA MENDOZA O. (2000)	NORTH AMERICAN CORDILLERA - MESOZOIC / CORDILLERA MEXICO / GUERRERO / HUETAMO SEQUENCE//	-101.55	17.63	19.06	VOLCANIC ROCK	DACITE			MIOCENE		63.32	0.879128	41.1667	25.0529	0.0222672	0.51	16.31	5.51				2.82	0.93	0.04	0.64	7.74	0.17	1.71				167	79		7	16					11	494	12	71	0		289	8.03
2000	[8763] TALAVERA MENDOZA O. (2000)	NORTH AMERICAN CORDILLERA - MESOZOIC / CORDILLERA MEXICO / GUERRERO / HUETAMO SEQUENCE//	-101.55	17.63	19.06	VOLCANIC ROCK	ANDESITE			MIOCENE		60.03	0.822286	3.60382	27.9653	0.397351	1.26	16.75	3.52				3.62	0.69	0.08	3.24	6.25	0.22	3.93				107	257			8					60	151	41.9	158	19		14.6	53.14
2000	[8763] TALAVERA MENDOZA O. (2000)	NORTH AMERICAN CORDILLERA - MESOZOIC / CORDILLERA MEXICO / GUERRERO///	-101.55	17.63	19.06	VOLCANIC ROCK	ANDESITE			MIOCENE		61.62	0.813285	31.0949	31.5339	0.0469484	0.54	16.95	5.16				6.58	1.2	0.06	1.12	4.66	0.16	1.71				146	50		9	31					20	426	13.7	76	0		353	8.5
2000	[8763] TALAVERA MENDOZA O. (2000)	NORTH AMERICAN CORDILLERA - MESOZOIC / CORDILLERA MEXICO / GUERRERO///	-101.55	17.63	19.06	VOLCANIC ROCK	DACITE			MIOCENE		67.34	0.922228	24	15.6913	0.0940171	0.64	15.31	4.15				3.34	0.39	0.07	2.66	4.65	0.26	0.91				50	8		5	8					44	468	19.5	252	6		424	22.26
2000	[8763] TALAVERA MENDOZA O. (2000)	NORTH AMERICAN CORDILLERA - MESOZOIC / CORDILLERA MEXICO / GUERRERO///	-101.55	17.63	19.06	VOLCANIC ROCK	DACITE			MIOCENE		67.67	0.959476	18.1564	28.1594	0.141538	0.59	15.17	3.84				2.29	0.76	0.04	2.66	5.33	0.24	1.14				33	7		5	5					46	325	17.9	231	0		498	24.02
1997	[2375] STRAUB S. M. (1997)	MARIANA ARC / MARIANA TROUGH / DREDGE 58 KL///	144.839	17.9357	6.89	VOLCANIC ROCK	DACITE			QUATERNARY		65.7	0.942054	5.69231	27.2859	0.22973	0.8	14.6			5.7		3.6	1.2	0.16	2.8	3.6	0.28			17			1		9	1	23				51	222	39	208	7	1.7	451	15.48
2022	[26175] LIU FEI (2022)	ANDEAN ARC / CENTRAL ANDEAN VOLCANIC ZONE / BOLIVIA///	-67.775	-17.3808	58.7	PLUTONIC ROCK	MONZOGRANITE			MIOCENE		63.97	0.877764	42.807	39.0743	0.273566	0.73	14.54			4.28		4.26	1.54	0.05	4.06	2.69	0.31	3.6			4060										133.5	488	11.4	202	13.1		1090	64.9
2022	[26175] LIU FEI (2022)	ANDEAN ARC / CENTRAL ANDEAN VOLCANIC ZONE / BOLIVIA///	-67.775	-17.3808	58.7	VOLCANIC ROCK	DACITE			MIOCENE		64.56	0.973056	41.2727	42.6172	0.185022	0.79	15.06			4.8		3.07	2	0.06	3.99	3.39	0.28	1.8			4710										126	681	16.5	224	14.3		1260	54.2
2022	[26175] LIU FEI (2022)	ANDEAN ARC / CENTRAL ANDEAN VOLCANIC ZONE / BOLIVIA///	-67.775	-17.3808	58.7	VOLCANIC ROCK	DACITE			MIOCENE		62.64	0.916894	33.4302	44.7681	0.334783	0.77	14.66			4.64		3.19	2.11	0.11	4.55	3.2	0.3	3.83			4530										192.5	575	17.2	226	15.9		1185	68.8
2010	[13695] MAMANI M. (2010)	ANDEAN ARC / CENTRAL ANDEAN VOLCANIC ZONE / PERU / TARATA//	-69.6164	-17.5261	48.72	VOLCANIC ROCK	ANDESITE			NEOGENE		58.1	0.877314	83.0909	43.5038	0.0437637	0.845	17.5	6.97				5.92	2.71	0.107	2.74	3.78	0.289		8.99439	11		130	37		18	21	55	84	23		40	914	11	146	4	0.717774	923	20.8409
2010	[13695] MAMANI M. (2010)	ANDEAN ARC / CENTRAL ANDEAN VOLCANIC ZONE / PERU / TITIRE//	-69.8178	-17.2639	48.72	VOLCANIC ROCK	ANDESITE			QUATERNARY		56.8	0.853678	57.6154	41.6148	0.0987984	0.842	18	7.53				6.79	2.71	0.121	2.33	3.78	0.304		16.1034	9		92	23		9	10	45	94	21		74	749	13	267	9	0.788845	1310	28.2866
2010	[13695] MAMANI M. (2010)	ANDEAN ARC / CENTRAL ANDEAN VOLCANIC ZONE / PERU / TARATA / BARROSO FORMATION/	-70.2811	-17.1475	45.59	VOLCANIC ROCK	ANDESITE			NEOGENE		61.1	0.919009	57.7692	42.4866	0.0652463	0.605	17.4	5.63				5.22	2.1	0.091	2.66	3.99	0.192		7.66083	10		141	32		21	28	76	77	23		49	751	13	156	6	1.07575	937	27.1405
2010	[13695] MAMANI M. (2010)	ANDEAN ARC / CENTRAL ANDEAN VOLCANIC ZONE / PERU / TARATA//	-70.1392	-17.3992	45.59	VOLCANIC ROCK	ANDESITE			NEOGENE		60	0.901992	55.5385	41.9274	0.0817175	0.617	17.3	5.98				5.23	2.18	0.114	2.81	4.03	0.306		16.21	12		116	38		16	21	73	74	23		59	722	13	148	5	1.79908	961	21.2242
2010	[13695] MAMANI M. (2010)	ANDEAN ARC / CENTRAL ANDEAN VOLCANIC ZONE / PERU / TUTUPACA//	-70.3361	-17.05	45.59	VOLCANIC ROCK	DACITE			QUATERNARY		65.2	0.901146	74.7692	43.1455	0.0740741	0.81	15.8	4.28				3.6	1.64	0.06	3.51	4.37	0.307		14.9218	7		124	26		18	17	61	102	22		72	972	13	270	9	0.814309	1474	54.7208
2010	[13695] MAMANI M. (2010)	ANDEAN ARC / CENTRAL ANDEAN VOLCANIC ZONE / PERU / YUCAMANE-CALIENTES//	-70.2536	-17.1514	45.59	VOLCANIC ROCK	ANDESITE			QUATERNARY		63	0.925493	57.9333	43.5595	0.0805524	0.628	16	4.85				4.33	1.89	0.087	3.03	3.73	0.214		15.161	8		138	36		21	22	61	97	23		70	869	15	238	7	0.82053	1135	54.58
2010	[13695] MAMANI M. (2010)	ANDEAN ARC / CENTRAL ANDEAN VOLCANIC ZONE / PERU / YUCAMANE-CALIENTES//	-70.1678	-17.1536	45.59	VOLCANIC ROCK	ANDESITE			QUATERNARY		61.5	0.899297	62.1538	42.9596	0.108911	0.824	16.3	5.68				4.75	2.16	0.086	2.87	3.88	0.291		16.0972	8		118	39		15	19	44	91	23		88	808	13	241	6	1.79303	1155	42.5212
2010	[13695] MAMANI M. (2010)	ANDEAN ARC / CENTRAL ANDEAN VOLCANIC ZONE / PERU / YUCAMANE-CALIENTES//	-70.2	-17.3306	45.59	VOLCANIC ROCK	ANDESITE			QUATERNARY		58.3	0.893532	60.2143	42.7632	0.102017	0.663	17.7	6.68				6.09	2.52	0.092	1.81	4.12	0.212		19.3274	11		131	38		14	24	55	96	23		86	843	14	224	10	2.16293	1112	59.4384
2010	[13695] MAMANI M. (2010)	ANDEAN ARC / CENTRAL ANDEAN VOLCANIC ZONE / PERU / YUCAMANE-CALIENTES//	-70.1678	-17.1536	45.59	VOLCANIC ROCK	ANDESITE			QUATERNARY		61.1	0.897412	34.45	43.0863	0.053701	0.881	16.3	5.86				4.81	2.24	0.087	2.85	3.85	0.299		9.73829	24		249	181		33	92	53	84	19		37	689	20	101	4	0.899561	308	13.0281
2010	[13695] MAMANI M. (2010)	ANDEAN ARC / CENTRAL ANDEAN VOLCANIC ZONE / PERU///	-70.2436	-17.2558	45.59	VOLCANIC ROCK	ANDESITE			QUATERNARY		63.5	0.932686	30.4737	44.5372	0.284974	0.625	15.7	4.76				4.21	1.93	0.079	3.1	3.54	0.202		5.74345	18		133	152		23	92	59	61	16		165	579	19	163	8	9.35284	914	30.7059
2011	[15566] MARSKE J. P.(2011) [GeoReM [6201] ]	MARIANA ARC / MARIANA ARC - CENTRAL ISLAND PROVINCE / PAGAN / PAGAN CENTRAL VOLCANIC REGION//	145.751	18.0873	6.91	VOLCANIC ROCK	ANDESITE			QUATERNARY		56.15	0.822341	13.9847	40.1148	0.0520548	0.74	18.26			7.69		8.19	2.89	0.17	1.18	3.67	0.16	-0.02		17		213	3			3					19	365	26.1	92	2.09	0.305	244	9.17
2011	[15566] MARSKE J. P.(2011) [GeoReM [6201] ]	MARIANA ARC / MARIANA ARC - CENTRAL ISLAND PROVINCE / PAGAN / PAGAN SOUTH//	145.75	18.17	6.91	VOLCANIC ROCK	ANDESITE			QUATERNARY		61.76	0.877961	7.28947	34.0866	0.148736	0.73	15.44			6.79		4.84	1.97	0.17	2.16	3.92	0.22	1.12				111	0			0					41.2	277	38	172			391
2011	[15566] MARSKE J. P.(2011) [GeoReM [6201] ]	MARIANA ARC / MARIANA ARC - CENTRAL ISLAND PROVINCE / PAGAN / PAGAN SOUTH//	145.732	18.075	6.91	VOLCANIC ROCK	ANDESITE			QUATERNARY		60.12	0.843513	8.2659	36.9273	0.128322	0.79	16.03			6.85		5.82	2.25	0.16	1.93	3.85	0.23	0.83		15		148	3			0					36.7	286	34.6	158	3.53	1.16	358	14
2011	[15566] MARSKE J. P.(2011) [GeoReM [6201] ]	MARIANA ARC / MARIANA ARC - CENTRAL ISLAND PROVINCE / PAGAN / PAGAN SOUTH//	145.728	18.0825	6.91	VOLCANIC ROCK	ANDESITE			QUATERNARY		61.21	0.83992	7.75904	32.1377	0.113975	0.91	15.6			7.49		5.15	1.99	0.18	2.08	4.23	0.31	-0.09				114	0			0					36.7	322	41.5	161			418
2011	[15566] MARSKE J. P.(2011) [GeoReM [6201] ]	MARIANA ARC / MARIANA ARC - CENTRAL ISLAND PROVINCE / PAGAN / PAGAN SOUTH//	145.728	18.0825	6.91	VOLCANIC ROCK	ANDESITE			QUATERNARY		61.18	0.839637	8.025	32.3428	0.11838	0.9	15.61			7.42		5.16	1.99	0.18	2.08	4.23	0.31	-0.09				116	0			0					38	321	40	163			417
2011	[15566] MARSKE J. P.(2011) [GeoReM [6201] ]	MARIANA ARC / MARIANA ARC - CENTRAL ISLAND PROVINCE / PAGAN / PAGAN SOUTH//	145.715	18.0627	6.91	VOLCANIC ROCK	ANDESITE			QUATERNARY		61.6	0.867309	9.36782	37.4625	0.0822086	0.7	16.62			6.07		5.54	2.04	0.15	1.62	4.46	0.21	0.17				131	3			0					26.8	326	34.8	127			349
2011	[15566] MARSKE J. P.(2011) [GeoReM [6201] ]	MARIANA ARC / MARIANA ARC - CENTRAL ISLAND PROVINCE / PAGAN / PAGAN SOUTH//	145.713	18.0598	6.91	VOLCANIC ROCK	ANDESITE			QUATERNARY		57.56	0.789215	9.55128	39.9069	0.0969799	0.86	16.27			8.75		7.12	3.26	0.19	1.6	3.61	0.23	0.17				197	17			5					28.9	298	31.2	128			291
2010	[13695] MAMANI M. (2010)	ANDEAN ARC / CENTRAL ANDEAN VOLCANIC ZONE / CHILE///	-68.9667	-18.75	57	VOLCANIC ROCK	DACITE			QUATERNARY		66.32	0.897802	28.3158	43.7853	0.124535	0.74	14.97	4.17		0		3.09	1.64	0.06	4.5	3.76	0.22		15.2248	21		175	12		21	13	76	76	19		67	538	19	158	7	2.34232	657	19.1986
2010	[13695] MAMANI M. (2010)	ANDEAN ARC / CENTRAL ANDEAN VOLCANIC ZONE / CHILE / AJOYA / BARROSO-HUAYLLAS FORMATION/	-69.2194	-18.2458	52.09	VOLCANIC ROCK	ANDESITE			NEOGENE		61.74	0.910108	22.8	42.3217	0.153509	0.67	17.43	6.1		0		5.58	2.26	0.11	2.5	3.83	0.21			21			70		22	13					70	456	20	104	5			17.9
2010	[13695] MAMANI M. (2010)	ANDEAN ARC / CENTRAL ANDEAN VOLCANIC ZONE / CHILE / BARROSO-DIABLO FORMATION//	-69.3	-18.8278	52.09	VOLCANIC ROCK	ANDESITE			NEOGENE		56.91	0.860664	23.14	40.2519	0.184961	1.03	18.05		4.41	6.879	2.91	6.59	2.6	0.13	1.68	4.36	0.32	0.62		16.39		153	42		54.2	13					85.6	462.8	20	105	8		752	19.7
2010	[13695] MAMANI M. (2010)	ANDEAN ARC / CENTRAL ANDEAN VOLCANIC ZONE / CHILE / BARROSO-HUAYLLAS FORMATION//	-69.2597	-18.2903	52.09	VOLCANIC ROCK	ANDESITE			NEOGENE		63.24	0.885942	17.5565	44.4007	0.253591	0.68	15.89	4.34		0		4.24	1.75	0.08	3.05	4.21	0.2			14.66		132	33		66	10					102.4	403.8	23	105	8		769	21.5
2010	[13695] MAMANI M. (2010)	ANDEAN ARC / CENTRAL ANDEAN VOLCANIC ZONE / CHILE / BARROSO-HUAYLLAS FORMATION//	-69.2431	-18.3014	52.09	VOLCANIC ROCK	DACITE			NEOGENE		66.12	0.991152	24.1905	28.8891	0.120079	0.55	16.87	3.9		0		3.81	0.8	0.03	3.17	4.05	0.18			19.65		177	59		19.5	12					61	508	21	101	5		766	18.7
2010	[13695] MAMANI M. (2010)	ANDEAN ARC / CENTRAL ANDEAN VOLCANIC ZONE / CHILE / LAUCA / BARROSO-HUAYLLAS FORMATION/	-69.3833	-18.3333	52.09	VOLCANIC ROCK	DACITE			NEOGENE		65.82	0.973786	36.5333	40.6065	0.169252	0.54	16.08	4.49		0		3.74	1.55	0.09	3.7	3.47	0.16			7.3		77	63		8.5	17					74.2	438.4	12	135	10		667	32
2010	[13695] MAMANI M. (2010)	ANDEAN ARC / CENTRAL ANDEAN VOLCANIC ZONE / CHILE / PARINACOTA//	-69.2031	-18.2228	52.09	VOLCANIC ROCK	DACITE			QUATERNARY		67.02	0.911833	20.915	42.4686	0.35625	0.59	15.02	3.3		0		2.78	1.23	0.06	4.12	4.23	0.2			5		11	3		0	0	1	43	15		114	320	15.3	151	13.5	3	757	25
2010	[13695] MAMANI M. (2010)	ANDEAN ARC / CENTRAL ANDEAN VOLCANIC ZONE / CHILE / PARINACOTA//	-69.1599	-18.197	52.09	VOLCANIC ROCK	DACITE			QUATERNARY		67.82	0.975926	34.5882	41.2943	0.0459184	0.499	15.05	2.9		0		2.34	1.03	0.048	4.04	4.13	0.182		5.58587	21		150	16		20	11	80	85	19		27	588	17	125	6	0.765554	1184	17.8092
2010	[13695] MAMANI M. (2010)	ANDEAN ARC / CENTRAL ANDEAN VOLCANIC ZONE / CHILE / PARINACOTA//	-69.1396	-18.1989	52.09	VOLCANIC ROCK	ANDESITE			QUATERNARY		63.18	0.858357	106	44.7982	0.184906	0.921	15.47	4.71		0		3.86	1.93	0.067	3.48	4.4	0.375		3.36057	3		7	9		2	5	1.87469	7	11		98	530	5	50	10	20.0629	90	15.7071
2010	[13695] MAMANI M. (2010)	ANDEAN ARC / CENTRAL ANDEAN VOLCANIC ZONE / CHILE / PARINACOTA//	-69.1538	-18.2102	52.09	VOLCANIC ROCK	RHYOLITE			QUATERNARY		67.59	0.948016	38.3227	41.7875	0.100869	0.54	15	3.09		0		2.56	1.12	0.053	3.95	4.19	0.196		12.3407	9.95856		101.61	59.53		9.24	24.63	48.24	70.82			59.53	590.17	15.4	168.33	8.21	1.67922	1031.51	21.8532
2010	[13695] MAMANI M. (2010)	ANDEAN ARC / CENTRAL ANDEAN VOLCANIC ZONE / CHILE / TAAPACA VOLCANIC CENTER / BARROSO FORMATION/	-69.475	-18.0792	52.09	VOLCANIC ROCK	ANDESITE			PLIOCENE		62	0.942801	49.5455	32.6991	0.0477064	0.83	16.9		4.71	4.439	0.2	4.03	1.21	0.07	2.77	4.62	0.328	2.1				195	20		32	18	19	99	20.8		52	1090	22	201	18		1031
2010	[13695] MAMANI M. (2010)	ANDEAN ARC / CENTRAL ANDEAN VOLCANIC ZONE / CHILE / TAAPACA VOLCANIC CENTER//	-69.5175	-18.12	52.09	VOLCANIC ROCK	DACITE			QUATERNARY		64.1	0.895695	34.6667	44.8627	0.104167	0.8395	16		2.13	3.987	2.07	4.025	1.82	0.0615	3.025	4.42	0.276	0.61	11.212	18		181	77		57	43	77	85	6		65	624	18	217	7	1.56631	711	27.2622
2010	[13695] MAMANI M. (2010)	ANDEAN ARC / CENTRAL ANDEAN VOLCANIC ZONE / CHILE / TAAPACA VOLCANIC CENTER//	-69.5239	-18.1053	52.09	VOLCANIC ROCK	DACITE			QUATERNARY		65.5	0.935183	48.5161	43.9338	0.0771277	0.681	15.8	3.69		0		3.46	1.46	0.055	3.11	4.4	0.227			14		157	11		20	22	75	83	22		58	752	15.5	206	7.3		956	34
2010	[13695] MAMANI M. (2010)	ANDEAN ARC / CENTRAL ANDEAN VOLCANIC ZONE / CHILE / TAAPACA VOLCANIC CENTER//	-69.5117	-18.0922	52.09	VOLCANIC ROCK	DACITE			QUATERNARY		63.6	0.895957	47.0732	41.6713	0.0764249	0.813	16.2	4.38		0		3.89	1.58	0.062	3.21	4.58	0.36			13		134	7		16	11	107	80	22		59	772	16.4	225	8.2		1035	37
2010	[13695] MAMANI M. (2010)	ANDEAN ARC / CENTRAL ANDEAN VOLCANIC ZONE / CHILE / TAAPACA VOLCANIC CENTER//	-69.4833	-18.1597	52.09	VOLCANIC ROCK	DACITE			QUATERNARY		64.8	0.895186	53.9552	44.6125	0.0954357	0.78	16.1	4.18		0		3.89	1.7	0.06	3.03	4.64	0.27			13		113	37		16	26	49	76	21		69	723	13.4	183	7.4		1071	33
2010	[13695] MAMANI M. (2010)	ANDEAN ARC / CENTRAL ANDEAN VOLCANIC ZONE / CHILE / TAAPACA VOLCANIC CENTER//	-69.5478	-18.1311	52.09	VOLCANIC ROCK	ANDESITE			QUATERNARY		62.8	0.941547	54.8413	41.0494	0.155427	0.833	16.3	4.38				3.7	1.54	0.059	2.94	4.5	0.274					86	30		9	18	7	28.6	20.8		107.4	691	12.6	183	13.88	0.715	986	49.32
2010	[13695] MAMANI M. (2010)	ANDEAN ARC / CENTRAL ANDEAN VOLCANIC ZONE / CHILE / TAAPACA VOLCANIC CENTER//	-69.5219	-18.1272	52.09	VOLCANIC ROCK	DACITE			QUATERNARY		64.6	0.899542	51.2857	44.6029	0.149025	0.797	16	4.28				3.95	1.74	0.059	3.05	4.44	0.272					77	28		18	14	39	31	21.05		107	718	14	193	15	2	1157	45
2010	[13695] MAMANI M. (2010)	ANDEAN ARC / CENTRAL ANDEAN VOLCANIC ZONE / CHILE / TAAPACA VOLCANIC CENTER//	-69.5175	-18.12	52.09	VOLCANIC ROCK	ANDESITE			QUATERNARY		63.6	0.88903	31.0714	44.5596	0.193103	0.84	15.9	4.46				4.01	1.81	0.063	3.07	4.42	0.289					239	175		34	45	104	115	19.46		168	870	28	178	10	3.2	993	29
2010	[13695] MAMANI M. (2010)	ANDEAN ARC / CENTRAL ANDEAN VOLCANIC ZONE / CHILE / TAAPACA VOLCANIC CENTER//	-69.5331	-18.12	52.09	VOLCANIC ROCK	DACITE			QUATERNARY		64.9	0.901593	35.175	44.6095	0.14596	0.712	15.8	3.91				3.66	1.59	0.061	3.31	4.43	0.27			22		257	144		31	39	89	88	20.993		123.63	847.013	24.08	137.158	6.491	1.8	678.5	22.538
2010	[13695] MAMANI M. (2010)	ANDEAN ARC / CENTRAL ANDEAN VOLCANIC ZONE / CHILE / TAAPACA VOLCANIC CENTER//	-69.5239	-18.1053	52.09	VOLCANIC ROCK	DACITE			QUATERNARY		65.2	0.935207	44.2546	42.639	0.245472	0.68	15.8	3.73				3.43	1.4	0.058	3.16	4.4	0.235			7		87	29		14	16	39	48	21.594		161.982	659.88	14.911	223.213	17.147	1.9	1155	46.985
2010	[13695] MAMANI M. (2010)	ANDEAN ARC / CENTRAL ANDEAN VOLCANIC ZONE / CHILE / TAAPACA VOLCANIC CENTER//	-69.5239	-18.1053	52.09	VOLCANIC ROCK	DACITE			QUATERNARY		66	0.926978	18.4954	43.0774	0.148719	0.645	16.1	3.69				3.58	1.41	0.058	3.3	4.43	0.227			16		174	260		33	59	36	109	23.473		63.322	425.783	23.021	143.854	11.84	3.1	561.9	23.241
2010	[13695] MAMANI M. (2010)	ANDEAN ARC / CENTRAL ANDEAN VOLCANIC ZONE / CHILE / TAAPACA VOLCANIC CENTER//	-69.5178	-18.0858	52.09	VOLCANIC ROCK	DACITE			QUATERNARY		64.5	0.900778	56.1111	43.1861	0.273267	0.678	16.1	3.83				3.67	1.47	0.059	3.19	4.71	0.275					18	27		3	84	6	29	17.09		138	505	9	123	16	8.6	380	40
2010	[13695] MAMANI M. (2010)	ANDEAN ARC / CENTRAL ANDEAN VOLCANIC ZONE / CHILE / TAAPACA VOLCANIC CENTER//	-69.4833	-18.1597	52.09	VOLCANIC ROCK	DACITE			QUATERNARY		64.9	0.912118	25.375	44.0535	0.359606	0.765	16.2	4.15				3.87	1.65	0.061	3.13	4.46	0.265					14	7		2	2	7	36	15.74		146	406	16	113	17	11.3	287	34
2010	[13695] MAMANI M. (2010)	ANDEAN ARC / CENTRAL ANDEAN VOLCANIC ZONE / CHILE / TAAPACA VOLCANIC CENTER//	-69.5653	-18.1903	52.09	VOLCANIC ROCK	ANDESITE			QUATERNARY		63.4	0.917079	26.9237	42.785	0.385182	0.613	15.3	3.39				3.31	1.28	0.052	3.06	4.47	0.208			4		13	6		2	3	8	35	14.989		139.494	362.151	13.451	106.699	15.602	5.5	235.1	32.375
2010	[13695] MAMANI M. (2010)	ANDEAN ARC / CENTRAL ANDEAN VOLCANIC ZONE / CHILE / TAAPACA VOLCANIC CENTER//	-69.5903	-18.1917	52.09	VOLCANIC ROCK	DACITE			QUATERNARY		65.3	0.923385	47.8016	44.0677	0.366675	0.691	16	3.67				3.55	1.46	0.052	3.1	4.57	0.239			4		77	6		5	2	18	76	20.176		314.236	856.987	17.928	228.311	15.897	3	822	25.602
2021	[25332] ROUT S. S. (2021)	ANDEAN ARC / CENTRAL ANDEAN VOLCANIC ZONE / CHILE / TAAPACA VOLCANIC CENTER//	-69.48	-18.22	52.09	VOLCANIC ROCK	DACITE			PLEISTOCENE		63.4	0.917079	153.75	42.785	0.149593	0.613	15.3	3.39				3.31	1.28	0.052	3.06	4.47	0.208		42.6	4		80	8		7	7		68			92	615	4	163	6	7.02	886	24.8
2021	[25332] ROUT S. S. (2021)	ANDEAN ARC / CENTRAL ANDEAN VOLCANIC ZONE / CHILE / TAAPACA VOLCANIC CENTER//	-69.48	-18.22	52.09	VOLCANIC ROCK	DACITE			PLEISTOCENE		63.6	0.88903	83.4444	44.5596	0.117177	0.84	15.9	4.46				4.01	1.81	0.063	3.07	4.42	0.289		37.2	6		101	20		15	16		79			88	751	9	166	6	6.48	1055	30.2
2021	[25332] ROUT S. S. (2021)	ANDEAN ARC / CENTRAL ANDEAN VOLCANIC ZONE / CHILE / TAAPACA VOLCANIC CENTER//	-69.48	-18.22	52.09	VOLCANIC ROCK	DACITE			PLEISTOCENE		64.5	0.923683	77.4444	42.0144	0.114778	0.685	15.9	3.69				3.53	1.35	0.053	3.15	4.49	0.243		39.6	7		82	11		12	9		73			80	697	9	154	4	6.49	965	23.9
2021	[25332] ROUT S. S. (2021)	ANDEAN ARC / CENTRAL ANDEAN VOLCANIC ZONE / CHILE / TAAPACA VOLCANIC CENTER//	-69.48	-18.22	52.09	VOLCANIC ROCK	DACITE			PLEISTOCENE		64.9	0.912118	74.8	44.0535	0.113636	0.765	16.2	4.15				3.87	1.65	0.061	3.13	4.46	0.265		33.2	7		94	15		11	14		72			85	748	10	175	4	4.19	1050	27.1
2021	[25332] ROUT S. S. (2021)	ANDEAN ARC / CENTRAL ANDEAN VOLCANIC ZONE / CHILE / TAAPACA VOLCANIC CENTER//	-69.48	-18.22	52.09	VOLCANIC ROCK	DACITE			PLEISTOCENE		64.9	0.901593	70.8182	44.6095	0.127086	0.712	15.8	3.91				3.66	1.59	0.061	3.31	4.43	0.27		40.3	5		88	8		8	12		71			99	779	11	165	6	6.92	1104	28.3
2021	[25332] ROUT S. S. (2021)	ANDEAN ARC / CENTRAL ANDEAN VOLCANIC ZONE / CHILE / TAAPACA VOLCANIC CENTER//	-69.48	-18.22	52.09	VOLCANIC ROCK	DACITE			PLEISTOCENE		65.2	0.935207	84.125	42.639	0.142645	0.68	15.8	3.73				3.43	1.4	0.058	3.16	4.4	0.235		40.5	6		80	8		6	13		74			96	673	8	171	8	6.82	936	23.8
2021	[25332] ROUT S. S. (2021)	ANDEAN ARC / CENTRAL ANDEAN VOLCANIC ZONE / CHILE / TAAPACA VOLCANIC CENTER//	-69.48	-18.22	52.09	VOLCANIC ROCK	DACITE			PLEISTOCENE		66	0.926978	63.9	43.0774	0.159624	0.645	16.1	3.69				3.58	1.41	0.058	3.3	4.43	0.227		36	7		70	18		4	13		67			102	639	10	147	5	6.97	940	19.1
2021	[25332] ROUT S. S. (2021)	ANDEAN ARC / CENTRAL ANDEAN VOLCANIC ZONE / CHILE / TAAPACA VOLCANIC CENTER//	-69.48	-18.22	52.09	VOLCANIC ROCK	DACITE			PLEISTOCENE		63.56	0.885854	77.6531	43.9883	0.111695	0.8729	15.76	4.625				4.075	1.834	0.0639	2.947	4.372	0.3113			7		103	22		13	15		82			85	761	9.8	174	6.6		1025	18
2010	[14948] BLATTER D. L. (2010)	MEXICAN VOLCANIC BELTS / TRANS MEXICAN VOLCANIC BELT / MICHOACAN///	-100.98	19.89	41.06	VOLCANIC ROCK	NOT GIVEN			QUATERNARY		57.22	0.801006	17.0333	40.6664	0.0704501	1.75	16.51			8.27		6.6	3.18	0.12	1.71	4.11	0.37					188	13			24	32	96	21		36	511	30	238	16		520	25
2010	[14948] BLATTER D. L. (2010)	MEXICAN VOLCANIC BELTS / TRANS MEXICAN VOLCANIC BELT / MICHOACAN///	-100.9	19.89	41.06	VOLCANIC ROCK	NOT GIVEN			QUATERNARY		60.49	0.856351	14.9	34.6368	0.116331	1.62	16.29			7.4		5.17	2.2	0.1	2.34	4.31	0.35					146	1			8	21	83	21		52	447	30	269	17		635
2010	[14948] BLATTER D. L. (2010)	MEXICAN VOLCANIC BELTS / TRANS MEXICAN VOLCANIC BELT / MICHOACAN///	-100.78	19.86	41.06	VOLCANIC ROCK	NOT GIVEN			QUATERNARY		57.82	0.841807	12.7561	41.8147	0.0726577	1.33	17.32			7.54		6.45	3.04	0.09	1.7	4.26	0.35					133	18			16	23	95	21		38	523	41	236	14		481	35
2010	[14948] BLATTER D. L. (2010)	MEXICAN VOLCANIC BELTS / TRANS MEXICAN VOLCANIC BELT / MICHOACAN///	-100.76	19.9	41.06	VOLCANIC ROCK	NOT GIVEN			QUATERNARY		60.91	0.832155	14.2581	34.5338	0.126697	1.63	15.9			7.4		5.09	2.19	0.1	2.37	4.43	0.37					152				6	22	92	22		56	442	31	269	18		651	47
2010	[14948] BLATTER D. L. (2010)	MEXICAN VOLCANIC BELTS / TRANS MEXICAN VOLCANIC BELT / MICHOACAN///	-100.75	19.89	41.06	VOLCANIC ROCK	NOT GIVEN			QUATERNARY		56.28	0.812034	18	43.6551	0.0611111	1.46	17.06			8.19		6.81	3.56	0.12	1.77	4.08	0.38					135	5			12	23	92	22		33	540	30	246	15		511	29
2010	[14948] BLATTER D. L. (2010)	MEXICAN VOLCANIC BELTS / TRANS MEXICAN VOLCANIC BELT / MICHOACAN///	-100.73	19.89	41.06	VOLCANIC ROCK	NOT GIVEN			QUATERNARY		58.41	0.851954	16.3226	40.0089	0.0770751	1.35	17.16			7.43		6.08	2.78	0.11	1.8	4.34	0.35					126	10			12	24	92	20		39	506	31	251	14		561	23
2010	[19298] LUHR J. F. (2010)	MEXICAN VOLCANIC BELTS / TRANS MEXICAN VOLCANIC BELT / JALISCO / COLIMA VOLCANIC COMPLEX//	-103.541	19.71	21.68	VOLCANIC ROCK	ANDESITE			HOLOCENE		61.46	0.932382	42.3125	43.0797	0.0310192	0.55	18.43		1.13	5.087	4.07	5.91	2.16	0.1	1.45	4.53	0.21	2.09		9.1		106	0		12	7	18	63			21	677	16	132	7	0.63	552	13.05
2010	[19298] LUHR J. F. (2010)	MEXICAN VOLCANIC BELTS / TRANS MEXICAN VOLCANIC BELT / JALISCO / COLIMA VOLCANIC COMPLEX//	-103.619	19.6408	21.68	VOLCANIC ROCK	ANDESITE			HOLOCENE		61.53	0.917946	48.9286	44.5451	0.0248175	0.43	18.49		1.07	4.793	3.83	5.71	2.16	0.1	1.48	4.96	0.24	0.81		8.4		77	12		10	10	13	67			17	685	14	146	5	0.55	495	14.09
2010	[19298] LUHR J. F. (2010)	MEXICAN VOLCANIC BELTS / TRANS MEXICAN VOLCANIC BELT / JALISCO / COLIMA VOLCANIC COMPLEX//	-103.616	19.6208	21.68	VOLCANIC ROCK	ANDESITE			HOLOCENE		60.42	0.98857	45.4667	44.2336	0.0234604	0.46	19.39		1.14	5.146	4.12	5.81	2.29	0.11	1.31	4.64	0.3	1.64		9.6		82	12		10	11	14	66			16	682	15	140	2	0.54	471	14.22
2010	[13695] MAMANI M. (2010)	ANDEAN ARC / CENTRAL ANDEAN VOLCANIC ZONE / CHILE / BARROSO FORMATION//	-68.8833	-19.75	61.5	VOLCANIC ROCK	ANDESITE			PLIOCENE		63.04	0.84428	26.931	43.5859	0.18822	1.14	16.21	5.46		0		4.49	2.13	0.07	3.19	4.61	0.4					107	99		30	39	27	104	24.1		147	781	29	356	31		1489
2010	[13695] MAMANI M. (2010)	ANDEAN ARC / CENTRAL ANDEAN VOLCANIC ZONE / CHILE / BARROSO FORMATION//	-68.8833	-19.75	61.5	VOLCANIC ROCK	ANDESITE			PLIOCENE		58.96	0.766443	26.4333	41.212	0.187894	1.25	16.48	6.3		0		5.45	2.23	0.08	3.37	4.83	0.66					103	99		15	41	24	105	24.1		149	793	30	360	31		1531
2010	[13695] MAMANI M. (2010)	ANDEAN ARC / CENTRAL ANDEAN VOLCANIC ZONE / CHILE / BARROSO FORMATION//	-68.8833	-19.75	61.5	VOLCANIC ROCK	ANDESITE			PLIOCENE		60.35	0.816297	29.6364	44.0995	0.131902	1.11	16.43	6		0		5.07	2.39	0.13	3.24	4.5	0.52					98	6		17	7	6	75	19.3		86	652	22	192	32		925
2010	[13695] MAMANI M. (2010)	ANDEAN ARC / CENTRAL ANDEAN VOLCANIC ZONE / CHILE / ISLUGA//	-68.8561	-19.15	61.5	VOLCANIC ROCK	ANDESITE			QUATERNARY		60.55	0.886365	54.1667	42.0271	0.123077	1.07	17.12	6.42		0		5.26	2.35	0.1	2.93	4	0.4			8.5			14		9	8	19				80	650	12	195	11	1.2	731	26.1
2010	[13695] MAMANI M. (2010)	ANDEAN ARC / CENTRAL ANDEAN VOLCANIC ZONE / CHILE / ISLUGA//	-68.8561	-19.15	61.5	VOLCANIC ROCK	ANDESITE			QUATERNARY		62.24	0.883547	51.3846	43.0184	0.161677	0.99	16.49	5.85		0		4.76	2.23	0.09	3.32	3.9	0.35			11.6			18		13	12	52				108	668	13	154	12	5.2	661	26.7
2003	[6573] GOMEZ-TUENA A.(2003) [GeoReM [735] ]	MEXICAN VOLCANIC BELTS / TRANS MEXICAN VOLCANIC BELT / VERACRUZ / PALMA SOLA//	-96.778	19.669	30	VOLCANIC ROCK	BASALT			NEOGENE		59.26	0.941031	16.2437	30.1642	0.153984	1.14	17.82	6.19				3.68	1.35	0.15	3.35	5.24	0.58	0.47	13.03	9.2		52	0.1		6.4		9.1	92.6	23.5		98.55	640	39.4	489.9	56.78	1.46	1133	76.42
2002	[11132] RODRIGUEZ S.-R. (2002)	MEXICAN VOLCANIC BELTS / TRANS MEXICAN VOLCANIC BELT / PUEBLA / LAS CUMBRES//	-97.25	19.25	41.67	VOLCANIC ROCK	ANDESITE		600000	PLEISTOCENE		62.18	0.975459	80.9231	27.7018	0.0627376	0.65	16.18		8.42			4.98	1.81	0.17	2.4	3	0	0.86													66	1052	13	159			530
2002	[11132] RODRIGUEZ S.-R. (2002)	MEXICAN VOLCANIC BELTS / TRANS MEXICAN VOLCANIC BELT / PUEBLA / LAS CUMBRES//	-97.25	19.25	41.67	VOLCANIC ROCK	ANDESITE		600000	PLEISTOCENE		61.42	0.959718	56.6	30.3526	0.0477032	0.46	16.42		8.18			5.18	2	0.14	2.82	2.82	0.02	0.41													54	1132	20	153			454
2005	[11140] RODRIGUEZ S.-R. (2005)	MEXICAN VOLCANIC BELTS / TRANS MEXICAN VOLCANIC BELT / PUEBLA / LAS CUMBRES//	-97.25	19.25	41.67	VOLCANIC ROCK	ANDESITE			PLEISTOCENE		61.68	0.963872	70.9231	35.1336	0.0661605	0.63	15.97	8.41				4.6	2.3	0.14	3.31	2.81	0	0.41													61	922	13	158			564
2000	[11134] GOMEZ-TUENA A. (2000)	MEXICAN VOLCANIC BELTS / TRANS MEXICAN VOLCANIC BELT / VERACRUZ / CERRO GRANDE VOLCANIC FIELD / CERRO GRANDE ANDESITE/	-97.6433	19.3717	41.67	VOLCANIC ROCK	ANDESITE	11000000	11000000	MIOCENE		58.65	0.901142	14.92	38.9601	0.0884718	0.92	18.16	7.54				6.77	2.43	0.13	1.38	3.86	0.16	1.06	10.68												33	373	25	148	5.9	1.22	434	14.91
2000	[11134] GOMEZ-TUENA A. (2000)	MEXICAN VOLCANIC BELTS / TRANS MEXICAN VOLCANIC BELT / VERACRUZ / CERRO GRANDE VOLCANIC FIELD / CERRO GRANDE ANDESITE/	-97.8233	19.6333	41.67	VOLCANIC ROCK	ANDESITE	11000000	11000000	MIOCENE		62.66	0.978758	60.9286	37.2376	0.0269637	0.68	18.69	4.74				5.7	1.42	0.04	1.73	4.17	0.17	0.71	7.59												23	853	14	141	5.9	0.35	395	16.67
2000	[11134] GOMEZ-TUENA A. (2000)	MEXICAN VOLCANIC BELTS / TRANS MEXICAN VOLCANIC BELT / VERACRUZ / CERRO GRANDE VOLCANIC FIELD / CRUZ DE LEON ANDESITE/	-97.6317	19.555	41.67	VOLCANIC ROCK	ANDESITE	9000000	9000000	MIOCENE		59.7	0.95438	23.55	44.9627	0.0828025	0.78	18.46	6.4				5.81	2.64	0.1	1.91	4.08	0.13	1.26	9.81												39	471	20	154	6.7	1.6	394	15.71
1997	[11299] MACIAS J. L. (1997)	MEXICAN VOLCANIC BELTS / TRANS MEXICAN VOLCANIC BELT / MEXICO / NEVADO DE TOLUCA / UPPER TOLUCA PUMICE/	-99.75	19.15	42.98	VOLCANIC ROCK	ANDESITE			NEOGENE		63.24	0.964064	38.2143	44.3162	0.071028	0.66	17.11	4.33				4.3	1.74	0.07	2.73	4.24	0.18	2.93		7.3		43	31.1		8.1	8	10	73			38	535	14	146			543
1997	[11299] MACIAS J. L. (1997)	MEXICAN VOLCANIC BELTS / TRANS MEXICAN VOLCANIC BELT / MEXICO / NEVADO DE TOLUCA / WHITE PUMICE FLOW/	-99.75	19.15	42.98	VOLCANIC ROCK	DACITE			NEOGENE		65.67	0.977871	33.1429	44.1698	0.101293	0.59	15.95	3.78				3.9	1.51	0.06	2.12	4.21	0.13	2.6		6.9		48	23.2		6.5	2	54	90			47	464	14	118			520
1997	[11299] MACIAS J. L. (1997)	MEXICAN VOLCANIC BELTS / TRANS MEXICAN VOLCANIC BELT / MEXICO / NEVADO DE TOLUCA//	-99.75	19.15	42.98	VOLCANIC ROCK	DACITE			NEOGENE		64.28	0.945637	38.6923	44.876	0.0994036	0.6	16.08	4.16				4.21	1.71	0.08	1.86	4.46	0.2	0.96		7.5		57	25.7		8.8	11	10	77			50	503	13	137			495
2014	[18521] CAI YUE (2014)	MEXICAN VOLCANIC BELTS / TRANS MEXICAN VOLCANIC BELT / MEXICO / NEVADO DE TOLUCA//	-99.82	19.14	42.98	VOLCANIC ROCK	NOT GIVEN			QUATERNARY		64.4944	0.964261	13.0857	43.876	0.110953	0.76619	16.6789			4.87835		4.30982	2.13963	0.0896605	2.16	4.3302	0.15283														51.7092	466.047	35.6149	184.594	5.55382	1.28153	461.476	24.1372
2014	[18521] CAI YUE (2014)	MEXICAN VOLCANIC BELTS / TRANS MEXICAN VOLCANIC BELT / MEXICO / NEVADO DE TOLUCA//	-99.827	19.14	42.98	VOLCANIC ROCK	NOT GIVEN			QUATERNARY		67.0253	0.980831	55.765	39.1153	0.069155	0.490953	16.4776			3.7742		3.78443	1.36035	0.0603463	2.52636	4.36744	0.132966														50.4769	729.91	13.089	141.777	4.39299	2.62128	455.276	17.074
2014	[18521] CAI YUE (2014)	MEXICAN VOLCANIC BELTS / TRANS MEXICAN VOLCANIC BELT / MEXICO / NEVADO DE TOLUCA//	-99.706	19.109	42.98	VOLCANIC ROCK	NOT GIVEN			QUATERNARY		63.978	0.953065	25.8482	44.6433	0.0858006	0.71098	16.7617			5.05889		4.33475	2.28891	0.0810233	2.05597	4.54743	0.182302														45.3703	528.788	20.4574	146.094	5.07189	1.35464	456.327	20.469
2014	[18521] CAI YUE (2014)	MEXICAN VOLCANIC BELTS / TRANS MEXICAN VOLCANIC BELT / MEXICO / NEVADO DE TOLUCA//	-99.66	19.118	42.98	VOLCANIC ROCK	NOT GIVEN			QUATERNARY		64.3124	0.953349	26.5602	41.7003	0.0844877	0.718625	16.7275			5.01218		4.30568	2.01134	0.0697399	2.17306	4.47751	0.192038														45.3742	537.051	20.2202	160.118	5.13089	1.37847	460.748	18.6204
2020	[24380] ARCE J. L. (2020)	MEXICAN VOLCANIC BELTS / TRANS MEXICAN VOLCANIC BELT / MEXICO///	-99	19.5	42.98	VOLCANIC ROCK	ANDESITE			MIOCENE		63.71	0.834649	35.1587	44.9953	0.0935321	0.75	15.25	5.06				4.98	2.09	0.09	3.12	3.55	0.24	1.19	20.3	13		128.7	109		11.7	4.3	6.3	62.2	19.5		68.4	731.3	20.8		9.5	1.4	670	25.4
1999	[3664] WALLACE P. J. (1999)	MEXICAN VOLCANIC BELTS / TRANS MEXICAN VOLCANIC BELT / MORELOS / CHICHINAUTZIN VOLCANIC FIELD - CERRO QUEPIL//	-99.28	19.17	42.98	VOLCANIC ROCK	DACITE			QUATERNARY		63.2	0.958998	19.5417	43.002	0.0959488	0.68	16.9			4.04		4.45	1.71	0.07	1.8	4.61	0.17									21	11	62	22		45	469	24	151	4		541	24
2008	[15443] ARCE J. L. (2008)	MEXICAN VOLCANIC BELTS / TRANS MEXICAN VOLCANIC BELT / MORELOS / CHICHINAUTZIN VOLCANIC FIELD - ZEMPOALA//	-99.3203	19.0478	42.98	VOLCANIC ROCK	DACITE			PLEISTOCENE		65.96	0.985933	16.5909	41.8664	0.252055	0.62	15.07	4.29				3.5	1.56	0.08	2.3	3.91	0.18	3.03				74	35		7	6	3	70			92	365	22	193	34		863
2012	[16735] HANYU TAKESHI (2012)	SULAWESI ARC / SULAWESI ARC / TAGULANDANG ISLAND GROUP / RUANG//	125.366	2.3	20.86	VOLCANIC ROCK	NOT GIVEN			QUATERNARY		65.96	0.990637	5.98015	30.5221	0.0950207	0.91	15.59	5.5				3.85	1.22	0.14	2.13	3.91	0.24														22.9	241	40.3	159	3.39	0.657	283	11.3
2017	[21249] LOSANTOS E.(2017) [GeoReM [10673] ]	MEXICAN VOLCANIC BELTS / TRANS MEXICAN VOLCANIC BELT / MICHOACAN / MICHOACAN-GUANAJUATO VOLCANIC FIELD//	-100.7	20.55	44.91	VOLCANIC ROCK	ANDESITE, BASALTIC			QUATERNARY		56.855	0.83089	15.4163	35.3703	0.0887143	1.435	17.883	7.889				5.994	2.18	0.13	2.942	4.523	0.483	0.18	14.0079	16.2305		148.363	9.80004		16.2648	8.80968	20.2734	90.0978	23.897		47.6207	536.787	34.8195	367.691	37.2776	0.583993	688.238	53.2141
2017	[21249] LOSANTOS E.(2017) [GeoReM [10673] ]	MEXICAN VOLCANIC BELTS / TRANS MEXICAN VOLCANIC BELT / MICHOACAN / MICHOACAN-GUANAJUATO VOLCANIC FIELD//	-100.7	20.55	44.91	VOLCANIC ROCK	ANDESITE			QUATERNARY		58.238	0.909524	23.7915	40.6599	0.0877049	1.412	17.898	7.619				5.714	2.636	0.113	2.251	4.166	0.378	0.26	12.5744	14.7463		142.768	18.1982		18.0163	10.8432	22.0184	80.2586	20.9022		46.2711	527.577	22.175	195.235	21.64	0.779187	640.879	24.2585
2017	[21249] LOSANTOS E.(2017) [GeoReM [10673] ]	MEXICAN VOLCANIC BELTS / TRANS MEXICAN VOLCANIC BELT / MICHOACAN / MICHOACAN-GUANAJUATO VOLCANIC FIELD//	-100.7	20.55	44.91	VOLCANIC ROCK	ANDESITE			QUATERNARY		61.05	0.89558	8.37006	25.7994	0.174243	1.085	16.332	8.225				4.211	1.444	0.13	2.928	4.505	0.481	-0.32	26.0301	13.7341		68.4612	2.5759		11.3574	1.04473	15.936	105.424	24.1847		66.8345	383.57	45.8265	430.371	27.6112	2.05202	763.945	40.7182
2017	[21249] LOSANTOS E.(2017) [GeoReM [10673] ]	MEXICAN VOLCANIC BELTS / TRANS MEXICAN VOLCANIC BELT / MICHOACAN / MICHOACAN-GUANAJUATO VOLCANIC FIELD//	-100.7	20.55	44.91	VOLCANIC ROCK	ANDESITE			QUATERNARY		57.12	0.858428	19.7463	44.975	0.0691115	1.29	18.339	7.005				7.343	2.891	0.109	1.684	3.763	0.29	0.24	10.3665	17.0066		141.855	32.4304		17.5862	10.9795	22.7938	71.8234	20.6153		36.9693	534.922	27.0898	187.067	10.4991	0.898073	511.692	22.2949
2017	[21249] LOSANTOS E.(2017) [GeoReM [10673] ]	MEXICAN VOLCANIC BELTS / TRANS MEXICAN VOLCANIC BELT / MICHOACAN / MICHOACAN-GUANAJUATO VOLCANIC FIELD//	-100.7	20.55	44.91	VOLCANIC ROCK	ANDESITE			QUATERNARY		57.69	0.825423	13.9172	42.9136	0.0885287	1.444	16.936	7.851				6.589	2.98	0.134	1.797	4.008	0.336	0.3	10.4285	18.4512		160.578	24.4706		22.745	8.44253	25.3415	82.1372	20.4423		41.5676	469.538	33.7381	226.423	12.0345	0.860015	643.466	28.9525
2017	[21249] LOSANTOS E.(2017) [GeoReM [10673] ]	MEXICAN VOLCANIC BELTS / TRANS MEXICAN VOLCANIC BELT / MICHOACAN / MICHOACAN-GUANAJUATO VOLCANIC FIELD//	-100.7	20.55	44.91	VOLCANIC ROCK	ANDESITE, BASALTIC			QUATERNARY		56.93	0.81192	12.4991	44.7233	0.0827822	1.358	17.24	7.811				7.172	3.191	0.114	1.64	3.902	0.319	0.42	12.0333	19.2695		161.984	57.3243		19.08	12.2678	24.3778	75.8589	20.1896		38.6578	466.982	37.3614	211.322	11.2042	1.21248	877.698	41.2056
2010	[14948] BLATTER D. L. (2010)	MEXICAN VOLCANIC BELTS / TRANS MEXICAN VOLCANIC BELT / MICHOACAN///	-101.99	20.09	39.15	VOLCANIC ROCK	NOT GIVEN			QUATERNARY		57.05	0.840681	40.4211	42.3821	0.03125	1.1	17.66			7.73		6.87	3.19	0.09	1.5	4.19	0.2					216	14			25	28	80	21		24	768	19	123	7		504	16
2009	[13899] MORI L.(2009) [GeoReM [4987] ]	MEXICAN VOLCANIC BELTS / TRANS MEXICAN VOLCANIC BELT / JALISCO / ALTOS DE JALISCO SUITE//	-102.589	20.7594	35.2	VOLCANIC ROCK	TRACHYANDESITE			MIOCENE		57.65	0.871093	22.5552	43.5283	0.0447552	1	17.36	7.22				5.74	2.81	0.13	1.84	4.56	0.57	0.74	11.2	13.6		106	2.13		13.6	0.9	9	91	21		32	715	31.7	255	10.6	0.48	685	30
2009	[13899] MORI L.(2009) [GeoReM [4987] ]	MEXICAN VOLCANIC BELTS / TRANS MEXICAN VOLCANIC BELT / JALISCO / ALTOS DE JALISCO SUITE//	-102.868	20.8783	35.2	VOLCANIC ROCK	ANDESITE			MIOCENE		57.24	0.866476	24.5317	39.9514	0.0357143	1.18	17.58	7.68				6.44	2.58	0.12	1.62	4.15	0.38	0.7	11.3	18		152	5.58		17.2	5.13	54	76	21.3		29	812	33.1	163	8.5	0.26	519	22.6
2010	[14948] BLATTER D. L. (2010)	MEXICAN VOLCANIC BELTS / TRANS MEXICAN VOLCANIC BELT / MICHOACAN///	-102.32	20.2	35.2	VOLCANIC ROCK	NOT GIVEN			QUATERNARY		61.85	0.928452	20.4	43.6184	0.0588235	0.77	16.85			5.76		5.22	2.5	0.08	1.95	3.98	0.29					94	42			27	32	74	20		30	510	25	245	12		856	39
2014	[18520] PETRONE C. M.(2014) [GeoReM [7910] ]	MEXICAN VOLCANIC BELTS / TRANS MEXICAN VOLCANIC BELT / MEXICO / SAN PEDRO//	-103.34	20.776	28.4	VOLCANIC ROCK	ANDESITE			PLIOCENE-QUATERNARY		58.9	0.954715	58.6429	41.5627	0.0260292	0.81	16.8		3.41	5.739	2.67	5.47	2.29	0.09	1.37	3.75	0.15	4.31	12.55	10.7		100	7.96		12.77	7.1	13.41	68.65	20.42		21.37	821	14	166	6.05	0.85	471	15.71
2004	[7940] MAURY R. C. (2004)	SUNDA ARC / ANDAMAN ARC / BURMA (MYANMAR) / MOUNT POPA//	95.25	20.92	28	VOLCANIC ROCK	DACITE			QUATERNARY		64.4	0.98042	34.6023	33.4447	0.313629	0.31	17.4	3.35				3.73	0.85	0.06	3.52	4.35	0.17	1.28		5.7		79	5.5		9	5					191	609	17.6	93	11.2		1172	51
2016	[20049] LEE HAO-YANG(2016) [GeoReM [9812] ]	SUNDA ARC / ANDAMAN ARC / BURMA (MYANMAR) / MOUNT POPA//	95.275	20.7739	28	VOLCANIC ROCK	ANDESITE			MIOCENE		58.74	0.803657	19.819	43.9193	0.251142	0.58	17.24	5.69				6.98	2.25	0.11	2.76	3.51	0.17	1.96		14.1		130	21.6		14.1	10.3	21.7	46.3	17.4		110	438	22.1	183	4.18	2.9	521	34.3
2016	[20049] LEE HAO-YANG(2016) [GeoReM [9812] ]	SUNDA ARC / ANDAMAN ARC / BURMA (MYANMAR) / MOUNT POPA//	95.2619	20.775	28	VOLCANIC ROCK	ANDESITE, BASALTIC			MIOCENE		56.37	0.850712	18.9925	44.5459	0.202358	0.75	17.7	6.78				6.36	2.75	0.14	2.84	3.75	0.26	1.43		16.3		175	9.2		19	10.6	59.9	53.4	19.5		103	509	26.8	180	5.44	1.96	644	43.8
2014	[18520] PETRONE C. M.(2014) [GeoReM [7910] ]	MEXICAN VOLCANIC BELTS / TRANS MEXICAN VOLCANIC BELT / MEXICO / SAN PEDRO//	-104.669	21.126	28.9	VOLCANIC ROCK	DACITE			PLIOCENE-QUATERNARY		64.8	0.875848	30.3349	43.7565	0.0523817	0.66	16		3.04	4.376	1.64	5	1.91	0.07	2.05	4.23	0.14	0.49	10.3	13.84		103	28.97		12.41	20.79	20.65	59.98	19.28		33.21	634	20.9	162	6.44	0.52	1026	25.99
1980	[2595] WOOD D. A. (1980)	MARIANA ARC / UNNAMED SEAMOUNT (MARIANA ARC)////	143.45	21.95	6.77	VOLCANIC ROCK	ANDESITE			RECENT		60.6	0.811526	8.95	28.3512	0.0893855	1.11	14	9.91				5.32	1.98	0.19	1.47	3.64	0.24			24.8			0		16.4	0		110	14		32	358	40	105	2	0.86	633	19
1980	[2595] WOOD D. A. (1980)	MARIANA ARC / UNNAMED SEAMOUNT (MARIANA ARC)////	143.45	21.95	6.77	VOLCANIC ROCK	ANDESITE			RECENT		56.7	0.719813	10.303	33.1352	0.0852941	1.28	13.8	11.43				6.99	2.86	0.18	1.29	3.08	0.15			32.2			6		27.7	0		99	17		29	340	33	98	3	0.78	536	17
1980	[2595] WOOD D. A. (1980)	MARIANA ARC / UNNAMED SEAMOUNT (MARIANA ARC)////	143.45	21.95	6.77	VOLCANIC ROCK	ANDESITE			RECENT		56.9	0.7732	11.9355	33.8089	0.1	1.13	15.1	10.12				7.26	2.61	0.16	1.41	2.92	0.18						9			0		98	16		37	370	31	105	3		555	17
1980	[2595] WOOD D. A. (1980)	MARIANA ARC / UNNAMED SEAMOUNT (MARIANA ARC)////	143.45	21.95	6.77	VOLCANIC ROCK	ANDESITE			RECENT		58	0.791704	12.1333	34.1584	0.0714286	0.95	15.4	9.62				7.08	2.52	0.18	1.2	3.21	0.18						10			2		90	13		26	364	30	82	0		500	15
1980	[2595] WOOD D. A. (1980)	MARIANA ARC / UNNAMED SEAMOUNT (MARIANA ARC)////	143.45	21.95	6.77	VOLCANIC ROCK	ANDESITE			RECENT		59.6	0.808971	10.1429	34.8904	0.0760563	0.98	14.9	9.72				6.38	2.63	0.18	1.33	3.27	0.17						3			0		98	15		27	355	35	91	0		562	16
1980	[2595] WOOD D. A. (1980)	MARIANA ARC / UNNAMED SEAMOUNT (MARIANA ARC)////	143.45	21.95	6.77	VOLCANIC ROCK	ANDESITE			RECENT		57.3	0.741034	10.4516	35.2932	0.095679	1.14	13.7	10.53				6.81	2.9	0.17	1.31	2.85	0.14			27.2			6		20.6	3		92	14		31	324	31	92	0	0.82	574	16
1980	[2595] WOOD D. A. (1980)	MARIANA ARC / UNNAMED SEAMOUNT (MARIANA ARC)////	143.45	21.95	6.77	VOLCANIC ROCK	ANDESITE			RECENT		59.7	0.80296	8.97436	28.6799	0.0914286	1.1	13.4	9.85				5.14	2	0.19	1.48	3.49	0.22			24.4			0		16.4	0		121	16		32	350	39	103	0	0.89	644	21
1980	[2595] WOOD D. A. (1980)	MARIANA ARC / UNNAMED SEAMOUNT (MARIANA ARC)////	143.45	21.95	6.77	VOLCANIC ROCK	ANDESITE			RECENT		60.5	0.812313	9.21053	27.7033	0.0885714	1.11	13.9	9.82				5.21	1.9	0.19	1.48	3.67	0.23			24.6			0		16.6	0		112	15		31	350	38	104	0	0.87	644	20
2019	[23278] GONZALEZ-MAUREL O. (2019)	ANDEAN ARC / CENTRAL ANDEAN VOLCANIC ZONE / CHILE / APACHETA//	-68.1242	-21.8458	62.15	VOLCANIC ROCK	ANDESITE			QUATERNARY		59.49	0.917275	24.7423	43.3488	0.281528	0.78	16.82	5.72				5.36	2.21	0.1	3.12	3.17	0.29	2.17	10.7	13		130	7		20.5	7	22	109			202.7	720	29.1	169	10.31		939	42.73
2022	[25697] GODOY B. (2022)	ANDEAN ARC / CENTRAL ANDEAN VOLCANIC ZONE / CHILE / AZUFRE / AZUFRE IGNIMBRITE/	-68.2386	-21.8333	62.15	VOLCANIC ROCK	ANDESITE			PLEISTOCENE		60.9	0.921919	39.6	41.622	0.183502	0.59	18.1			4.7		5.61	1.88	0.07	2.56	4.05	0.18	0.44		8.67			22.8			0					109	594	15	190	8.68		721	29.4
2022	[25697] GODOY B. (2022)	ANDEAN ARC / CENTRAL ANDEAN VOLCANIC ZONE / CHILE / AZUFRE / AZUFRE IGNIMBRITE/	-68.2313	-21.8206	62.15	VOLCANIC ROCK	ANDESITE			PLEISTOCENE		63.2	0.925145	35	42.2606	0.22604	0.52	17.7			4.14		5.23	1.7	0.07	2.69	4.08	0.14	-0.07		10.2			30.4			0					125	553	15.8	170	8.82		648	31.4
2022	[25697] GODOY B. (2022)	ANDEAN ARC / CENTRAL ANDEAN VOLCANIC ZONE / CHILE / AZUFRE / AZUFRE IGNIMBRITE/	-68.2825	-21.7681	62.15	VOLCANIC ROCK	ANDESITE			PLEISTOCENE		63.7	0.931105	33.3582	42.7887	0.290828	0.55	15.8			3.98		3.97	1.67	0.07	3.34	3.73	0.16	1.35		6.54			61.3			5.2					130	447	13.4	172	9.65		806	21.6
2022	[25697] GODOY B. (2022)	ANDEAN ARC / CENTRAL ANDEAN VOLCANIC ZONE / CHILE / AZUFRE / AZUFRE IGNIMBRITE/	-68.1994	-21.7261	62.15	VOLCANIC ROCK	ANDESITE			PLEISTOCENE		63	0.915197	26.6667	44.2634	0.351415	0.67	15.7			5.05		4.48	2.25	0.08	3.43	3.22	0.21	1.4		11.6			11.2			0					149	424	15.9	185	10.8		766	31.7
2022	[25697] GODOY B. (2022)	ANDEAN ARC / CENTRAL ANDEAN VOLCANIC ZONE / CHILE / AZUFRE / AZUFRE IGNIMBRITE/	-68.2344	-21.7622	62.15	VOLCANIC ROCK	ANDESITE			PLEISTOCENE		65.4	0.964684	31.4493	40.3071	0.313364	0.5	15.7			3.59		3.48	1.36	0.07	3.4	3.81	0.15	1.18		6.04			17.8			0					136	434	13.8	169	9.78		827	21.9
2022	[25697] GODOY B. (2022)	ANDEAN ARC / CENTRAL ANDEAN VOLCANIC ZONE / CHILE / AZUFRE / AZUFRE IGNIMBRITE/	-68.2983	-21.8208	62.15	VOLCANIC ROCK	ANDESITE			PLEISTOCENE		62.6	0.934201	44.2748	43.9705	0.141379	0.57	17.8			4.27		5.54	1.88	0.06	2.34	3.92	0.15	0.3		8.61			22			0					82	580	13.1	161	7.59		703	28.3
2022	[25697] GODOY B. (2022)	ANDEAN ARC / CENTRAL ANDEAN VOLCANIC ZONE / CHILE / AZUFRE / AZUFRE IGNIMBRITE/	-68.2334	-21.8322	62.15	VOLCANIC ROCK	ANDESITE			PLEISTOCENE		61.8	0.918849	38.1379	42.2195	0.224231	0.63	17.5			4.83		5.24	1.98	0.07	2.73	3.99	0.18	0.13		8.32			54.5			0					124	553	14.5	178	9.08		769	29
2022	[25697] GODOY B. (2022)	ANDEAN ARC / CENTRAL ANDEAN VOLCANIC ZONE / CHILE / AZUFRE / AZUFRE IGNIMBRITE/	-68.2675	-21.7194	62.15	VOLCANIC ROCK	ANDESITE			PLEISTOCENE		60.9	0.896714	31.5441	43.6555	0.351981	0.58	14.9			4.44		4.32	1.93	0.08	3.11	3.28	0.23	1.53		9.91			11.7			0					151	429	13.6	154	10.4		708	26.5
2022	[25697] GODOY B. (2022)	ANDEAN ARC / CENTRAL ANDEAN VOLCANIC ZONE / CHILE / AZUFRE / AZUFRE IGNIMBRITE/	-68.1847	-21.7478	62.15	VOLCANIC ROCK	ANDESITE			PLEISTOCENE		60	0.884637	29.3293	44.4772	0.237006	0.8	16.3			6.03		5.37	2.71	0.1	2.79	3.43	0.24	0.69		14.2			64.6			0					114	481	16.4	173	9.67		755	25.5
2010	[13695] MAMANI M. (2010)	ANDEAN ARC / CENTRAL ANDEAN VOLCANIC ZONE / CHILE / CEBOLLAR / BARROSO-HUAYLLAS FORMATION/	-68.45	-21.6	62.15	VOLCANIC ROCK	ANDESITE			PLIOCENE		61.76	0.933296	55.8333	40.8211	0.0487562	0.66	17.74	5.57		0		5.07	1.94	0.07	2.54	4.28	0.2	0.81				156	97		30	42	26	106	23.7		49	1005	18	226	20		1173
2010	[13695] MAMANI M. (2010)	ANDEAN ARC / CENTRAL ANDEAN VOLCANIC ZONE / CHILE / CHELA / BARROSO-HUAYLLAS FORMATION/	-68.4833	-21.4	62.15	VOLCANIC ROCK	ANDESITE			PLIOCENE		59.96	0.910701	40.05	42.2628	0.0923845	0.77	18.14	6.25		0		5.58	2.31	0.1	2.92	4.02	0.26	0.83				142	31		27	19	12	84	22.6		74	801	20	206	20		1617
2008	[11717] VEZZOLI L. M. (2008)	ANDEAN ARC / CENTRAL ANDEAN VOLCANIC ZONE / CHILE / OLLAGUE / EL AZUFRE SERIES/	-68.15	-21.32	62.15	VOLCANIC ROCK	ANDESITE			PLEISTOCENE		63.81	0.928554	35.7931	43.2208	0.208092	0.73	16.03			4.73		4.18	2.02	0.06	2.94	3.94	0.21	0.87				94.3	30		9.42				23.2		108	519	14.5	203	12.3	4.58	995	40.2
2008	[11717] VEZZOLI L. M. (2008)	ANDEAN ARC / CENTRAL ANDEAN VOLCANIC ZONE / CHILE / OLLAGUE / LA CELOSA SERIES/	-68.2	-21.333	62.15	VOLCANIC ROCK	DACITE			PLEISTOCENE		66.31	0.945541	39.7163	38.5466	0.288265	0.55	14.98			3.41		3.03	1.2	0.04	3.62	3.9	0.16	1.63				54.2	0		5.38				20.9		113	392	9.87	218	12.2	5	1140	40.5
2008	[11717] VEZZOLI L. M. (2008)	ANDEAN ARC / CENTRAL ANDEAN VOLCANIC ZONE / CHILE / OLLAGUE / SANTA CECILIA SERIES/	-68.18	-21.31	62.15	VOLCANIC ROCK	ANDESITE			PLEISTOCENE		61.62	0.942001	41.8898	41.7683	0.182519	0.73	16.55			4.97		4.44	2	0.06	2.74	3.97	0.18	3.1				92.1	24.1		8.88				22.2		97.1	532	12.7	174	9.4	3.83	897	36.6
2008	[11717] VEZZOLI L. M. (2008)	ANDEAN ARC / CENTRAL ANDEAN VOLCANIC ZONE / CHILE / OLLAGUE / SANTA ROSA FORMATION/	-68.15	-21.32	62.15	VOLCANIC ROCK	DACITE			PLEISTOCENE		65.75	0.925071	26.5882	42.2954	0.265487	0.67	15.67			4.28		3.8	1.76	0.06	3.37	3.88	0.19	0.94				83.5	21.7		7.5				22.2		120	452	17	205	12	4.87	1020	46.5
2008	[11717] VEZZOLI L. M. (2008)	ANDEAN ARC / CENTRAL ANDEAN VOLCANIC ZONE / CHILE / OLLAGUE / VINTA LOMA SERIES/	-68.001	-21.3	62.15	VOLCANIC ROCK	ANDESITE			PLEISTOCENE		63.66	0.903169	27.1698	42.6385	0.252315	0.73	15.62			4.58		4.13	1.91	0.06	3.6	3.58	0.22	1.53				87.8	25.9		7.99				21.7		109	432	15.9	216	13.3	4.68	1000	39
2008	[11717] VEZZOLI L. M. (2008)	ANDEAN ARC / CENTRAL ANDEAN VOLCANIC ZONE / CHILE / OLLAGUE / VINTA LOMA SERIES/	-68.001	-21.3	62.15	VOLCANIC ROCK	DACITE			PLEISTOCENE		66.13	0.949195	34.7059	40.8876	0.273608	0.61	15.54			4.02		3.39	1.56	0.05	3.58	3.85	0.18	1.15				74.1	22.9		7.27				21.3		113	413	11.9	212	12.3	6.21	1060	36
2008	[11717] VEZZOLI L. M. (2008)	ANDEAN ARC / CENTRAL ANDEAN VOLCANIC ZONE / CHILE / OLLAGUE / VINTA LOMA SERIES/	-68.001	-21.3	62.15	VOLCANIC ROCK	DACITE			PLEISTOCENE		66.45	0.979905	36.422	39.3089	0.282116	0.54	14.69			3.44		2.94	1.25	0.04	3.41	3.62	0.17	2.35				50	0		5.38				21.5		112	397	10.9	210	11.9	4.57	1090	42.2
2008	[11717] VEZZOLI L. M. (2008)	ANDEAN ARC / CENTRAL ANDEAN VOLCANIC ZONE / CHILE / OLLAGUE / VINTA LOMA SERIES/	-68.001	-21.3	62.15	VOLCANIC ROCK	DACITE			PLEISTOCENE		66.28	0.960769	38.75	37.8544	0.282878	0.56	14.99			3.57		2.96	1.22	0.05	3.5	3.91	0.18	1.46				52.7	0		5.2				21.3		114	403	10.4	216	12.4	4.87	1150	37.2
2019	[23278] GONZALEZ-MAUREL O. (2019)	ANDEAN ARC / CENTRAL ANDEAN VOLCANIC ZONE / CHILE / PALPANA//	-68.4731	-21.5156	62.15	VOLCANIC ROCK	TRACHYANDESITE			PLIOCENE		61.57	0.891352	41.9118	43.7861	0.136772	0.84	16.81	5.67				4.88	2.23	0.07	2.6	4.36	0.24	0.37	14.7	7.6		125	37		22.8	15	57	94			77.96	570	13.6	180	7.82		905	26.61
2010	[14850] KAY S. M. (2010)	ANDEAN ARC / CENTRAL ANDEAN VOLCANIC ZONE / ARGENTINA / CERRO MORADO VOLCANIC FIELD//	-66.6822	-22.7953	57.68	VOLCANIC ROCK	NOT GIVEN	6700000	6700000	MIOCENE		57.8	0.940727	26.2083	40.8821	0.122417	1.5	16.78			8.48		6.1	3.29	0.06	2.92	2.18	0.35			14			208		20	55					77	629	24	240	19	3	832	46.3
2010	[14850] KAY S. M. (2010)	ANDEAN ARC / CENTRAL ANDEAN VOLCANIC ZONE / ARGENTINA / GRANADA IGNIMBRITE VOLCANIC COMPLEX / OROSMAYO IGNIMBRITE/	-66.4206	-22.4664	57.68	VOLCANIC ROCK	NOT GIVEN	10300000	10300000	MIOCENE		64.198	0.84234	24.9182	40.6313	0.328694	1.038	15.392			4.24		4.686	1.628	0.061	4.892	2.71009	0.417	1.65		9.12004			18.4286		5.93863	11.0525					172	523.283	21	179	22	45.9184	915.421	62.3556
2010	[14850] KAY S. M. (2010)	ANDEAN ARC / CENTRAL ANDEAN VOLCANIC ZONE / ARGENTINA / RACHAITE VOLCANIC COMPLEX//	-66.0718	-22.8995	57.68	VOLCANIC ROCK	DACITE	7200000	8400000	MIOCENE		62.05	0.983024	23.44	41.7106	0.186007	0.95	16.57			5.48		4.09	2.2	0.09	3.87	3.18	0.35			12.5			25		11	9					109	586	25	221	20	4.77	834	60.6
2010	[14850] KAY S. M. (2010)	ANDEAN ARC / CENTRAL ANDEAN VOLCANIC ZONE / ARGENTINA / VILAMA CALDERA / CERRO SALLE LAVA/	-66.8042	-22.4467	57.68	VOLCANIC ROCK	NOT GIVEN	10000000	10000000	MIOCENE		64.3	0.967364	31.1111	40.1204	0.251786	0.99	16.11			5.56		4.56	2.09	0.06	3.79	2.59				11.07			79		10.2	12.6					141	560	18	202	15	7.7	1400	58.56
2019	[23278] GONZALEZ-MAUREL O. (2019)	ANDEAN ARC / CENTRAL ANDEAN VOLCANIC ZONE / CHILE / LICANCABUR//	-68.0258	-22.8764	61.6	VOLCANIC ROCK	ANDESITE			QUATERNARY		58.99	0.87237	14.6309	34.6474	0.200229	1.11	17.16	6.5				6.27	1.74	0.09	2.55	3.35	0.27	0.79	15.5	13.3		175	2		28.9	18	20	93			87.3	436	29.8	201	11.14		614	28.55
2020	[24351] URETA G. (2020)	ANDEAN ARC / CENTRAL ANDEAN VOLCANIC ZONE / CHILE / ALTIPLANO-PUNA VOLCANIC COMPLEX//	-67.9515	-23.8341	52.97	VOLCANIC ROCK	ANDESITE			QUATERNARY		58.41	0.813726	65.9231	37.0181	0.0455076	1.31	16.88	7.75				6.67	2.3	0.1	2.11	3.85	0.26		15	12		171	55		22	41	49	96	23	2.6	39	857	13	274	12	0.81		41
2020	[24351] URETA G. (2020)	ANDEAN ARC / CENTRAL ANDEAN VOLCANIC ZONE / CHILE / ALTIPLANO-PUNA VOLCANIC COMPLEX//	-67.9515	-23.8341	52.97	VOLCANIC ROCK	ANDESITE, BASALTIC			QUATERNARY		56.68	0.683276	61.2143	42.2865	0.0431739	1.23	15.1	7.19				7.65	2.66	0.11	2.02	3.65	0.29		16	11		141	41		20	35	56	94	22	5.5	37	857	14	263	11	0.88		39
2020	[24351] URETA G. (2020)	ANDEAN ARC / CENTRAL ANDEAN VOLCANIC ZONE / CHILE / ALTIPLANO-PUNA VOLCANIC COMPLEX//	-67.9507	-23.8366	52.97	VOLCANIC ROCK	ANDESITE			QUATERNARY		58.49	0.7424	56.0625	36.8683	0.0457079	1.32	16.2	7.8				7.03	2.3	0.1	2.09	4.12	0.3		16	13		186	78		22	32	85	98	23	1.6	41	897	16	286	12	0.85		40
2020	[24351] URETA G. (2020)	ANDEAN ARC / CENTRAL ANDEAN VOLCANIC ZONE / CHILE / ALTIPLANO-PUNA VOLCANIC COMPLEX//	-67.9509	-23.8341	52.97	VOLCANIC ROCK	ANDESITE			QUATERNARY		58.32	0.699907	64.0769	41.9156	0.0420168	1.28	15.36	7.41				7.21	2.7	0.1	2.07	4.01	0.31		18	12		150	66		22	32	106	96	21	4.5	35	833	13	263	11	0.73		39
2020	[24351] URETA G. (2020)	ANDEAN ARC / CENTRAL ANDEAN VOLCANIC ZONE / CHILE / ALTIPLANO-PUNA VOLCANIC COMPLEX//	-67.9862	-23.957	52.97	VOLCANIC ROCK	ANDESITE			QUATERNARY		59.18	0.823469	60.8571	32.8269	0.0352113	0.88	17.81	6.16				7.24	1.52	0.09	2.03	3.81	0.24		11	11		146	48		16	22	56	67	23	1	30	852	14	203	6.4	0.59		22
2020	[24351] URETA G. (2020)	ANDEAN ARC / CENTRAL ANDEAN VOLCANIC ZONE / CHILE / ALTIPLANO-PUNA VOLCANIC COMPLEX//	-67.9713	-23.9321	52.97	VOLCANIC ROCK	ANDESITE			QUATERNARY		60.85	0.756941	60.7857	42.8734	0.0387779	0.76	16.28	5.7				7.36	2.16	0.1	1.55	3.92	0.39		13	14		151	67		17	28	93	69	21	3.6	33	851	14	205	8.6	0.61		27
2020	[24351] URETA G. (2020)	ANDEAN ARC / CENTRAL ANDEAN VOLCANIC ZONE / CHILE / ALTIPLANO-PUNA VOLCANIC COMPLEX//	-67.9728	-23.9319	52.97	VOLCANIC ROCK	ANDESITE			QUATERNARY		56.4	0.792873	50.4706	35.8398	0.027972	1.11	17.72	7.8				8.07	2.2	0.12	1.53	3.66	0.31		11	17		188	120		25	43	31	78	23	1.6	24	858	17	204	7.8	0.62		21
2010	[13695] MAMANI M. (2010)	ANDEAN ARC / CENTRAL ANDEAN VOLCANIC ZONE / CHILE / LASCAR / BARROSO FORMATION/	-67.7534	-23.3319	52.97	VOLCANIC ROCK	RHYODACITE			PLIOCENE		65.78	0.974609	74.5	43.5868	0.0411074	0.597	15.37	4.05		0		3.76	1.58	0.067	3.71	2.99	0.15					144	91		30	37	28	105	23.8		49	1192	16	242	19		1319
2008	[12821] MAZZUOLI R. (2008)	ANDEAN ARC / CENTRAL ANDEAN VOLCANIC ZONE / ARGENTINA / LAS BURRAS MEMBER//	-65.8722	-24.3153	42.68	PLUTONIC ROCK	MONZODIORITE	14270000	14300000	MIOCENE		61.75	0.861223	22.124	39.8809	0.297776	0.69	16.69	6.18				5.57	2.07	0.16	3.7	3.19	0.32	0.35		10		104	12		13	8	22				164.7	553.1	25	162	31.6	7.78	418	34.5
2008	[12821] MAZZUOLI R. (2008)	ANDEAN ARC / CENTRAL ANDEAN VOLCANIC ZONE / ARGENTINA / LAS BURRAS MEMBER//	-65.86	-24.3322	42.68	PLUTONIC ROCK	NOT GIVEN	14300000	14300000	MIOCENE		61.08	0.848275	27.0763	37.2843	0.261346	0.66	16.46	5.63				5.35	1.69	0.15	3.53	3.56	0.31	0.44		8		90	9		11	7	17				167	639	23.6		36.9	4.25	471	38.7
2008	[12821] MAZZUOLI R. (2008)	ANDEAN ARC / CENTRAL ANDEAN VOLCANIC ZONE / ARGENTINA / PUERTA TASTIL MEMBER//	-65.7661	-24.5217	42.68	VOLCANIC ROCK	ANDESITE	12780000	12800000	MIOCENE		60.47	0.706759	22.8821	36.0179	0.270992	0.76	15.3	6.79				7.03	1.93	0.12	3.45	3.12	0.34	1.41		12		95	85		15	25	27				142	524	22.9	77	29.9	4.57	380	32.4
2010	[14850] KAY S. M. (2010)	ANDEAN ARC / CENTRAL ANDEAN VOLCANIC ZONE / ARGENTINA / VIZCAYAYOC IGNIMBRITE//	-66.2361	-24.2456	53.82	VOLCANIC ROCK	NOT GIVEN	13000000	13000000	MIOCENE		61.297	0.921016	16.3478	40.8855	0.31117	1.029	16.814			5.93		5.224	2.301	0.081	3.38	3.1	0.366	1.36		13.07			25.4		14.31	19.08					117	376	23	156	19	8.32	567	37.9
2001	[5286] RICHARDS J. P. (2001)	ANDEAN ARC / CENTRAL ANDEAN VOLCANIC ZONE / ARGENTINA / CERRO LLULLAILLACO//	-68.529	-24.754	54.33	VOLCANIC ROCK	DACITE			QUATERNARY		65.7	0.912987	74.1176	44.5338	0.11746	0.6	15.6	3.7	2.1		1.4	3.9	1.5	0.1	2.7	4.3	0.2	0.5	28	5.7		81									74	630	8.5	170	9.4	1.8	770	33
2001	[5286] RICHARDS J. P. (2001)	ANDEAN ARC / CENTRAL ANDEAN VOLCANIC ZONE / ARGENTINA / CERRO LLULLAILLACO//	-68.559	-24.756	54.33	VOLCANIC ROCK	DACITE			QUATERNARY		65.5	0.896968	78.0488	44.5338	0.0984375	0.7	15.8	3.7	2		1.6	4.1	1.5	0.1	2.7	4.4	0.2	0.1	27	5.8		82									63	640	8.2	200	9.2	1.5	770	35
2010	[13695] MAMANI M. (2010)	ANDEAN ARC / CENTRAL ANDEAN VOLCANIC ZONE / ARGENTINA / CERRO LLULLAILLACO//	-68.5581	-24.6839	54.33	VOLCANIC ROCK	DACITE			QUATERNARY		65.6	0.90537	76.4	44.7717	0.0558464	0.689	15.6	3.86				3.79	1.58	0.055	2.82	4.43	0.236	0.660714	9.85086	5.79106		107	5		29	3	18	86			64	1146	15	207	14	1.09064	1423	37.9332
2010	[13695] MAMANI M. (2010)	ANDEAN ARC / CENTRAL ANDEAN VOLCANIC ZONE / ARGENTINA / CERRO LLULLAILLACO//	-68.5747	-24.7647	54.33	VOLCANIC ROCK	DACITE			QUATERNARY		65.5	0.903074	51.8077	44.4235	0.0326652	0.706	15.7	3.89				3.79	1.57	0.055	2.75	4.57	0.256	0.582073		14.2		157	128		27	81	45	141	20.7		44	1347	26	265	20	1	1914	59.9
2011	[15311] GUZMAN S. R. (2011)	ANDEAN ARC / CENTRAL ANDEAN VOLCANIC ZONE / ARGENTINA / LUINGO CALDERA / PUCARILLA IGNIMBRITE - JASIMANA UNIT/	-66.3242	-25.9391	49.29	VOLCANIC ROCK	DACITE			MIOCENE		62.81	0.930123	19.9262	43.0854	0.290741	0.69	16.67	5.18				4.52	1.98	0.1	3.92	3.32	0.31	0.63				108	8						22.2		157	540	27.1	196	25.7	6.5	560	43.3
2011	[15311] GUZMAN S. R. (2011)	ANDEAN ARC / CENTRAL ANDEAN VOLCANIC ZONE / ARGENTINA / LUINGO CALDERA / PUCARILLA IGNIMBRITE - JASIMANA UNIT/	-66.3116	-25.97	49.29	VOLCANIC ROCK	DACITE			MIOCENE		62.39	0.944293	21.2551	40.2346	0.27619	0.7	16.59	5.06				4.25	1.72	0.11	3.91	3.41	0.28	0.77				102	10						20.7		145	525	24.7	196	25.4	5.6	569	42.2
2011	[15311] GUZMAN S. R. (2011)	ANDEAN ARC / CENTRAL ANDEAN VOLCANIC ZONE / ARGENTINA / LUINGO CALDERA / PUCARILLA IGNIMBRITE - JASIMANA UNIT/	-66.3639	-25.8166	49.29	VOLCANIC ROCK	DACITE			MIOCENE		65.54	0.961037	20.9459	33.7311	0.391398	0.59	16.13	4.28				3.69	1.1	0.1	4.46	3.19	0.26	1.18				84	6						19.3		182	465	22.2	204	23	6.2	627	42.3
2011	[15311] GUZMAN S. R. (2011)	ANDEAN ARC / CENTRAL ANDEAN VOLCANIC ZONE / ARGENTINA / LUINGO CALDERA / PUCARILLA IGNIMBRITE - JASIMANA UNIT/	-66.3248	-25.9086	49.29	VOLCANIC ROCK	DACITE			MIOCENE		64	0.92033	19.6047	41.9447	0.358871	0.64	15.93	4.66				4.04	1.7	0.1	4.19	3.3	0.29	0.55				84	11						20.5		178	496	25.3	192	24.8	8.3	569	42.1
2011	[15311] GUZMAN S. R. (2011)	ANDEAN ARC / CENTRAL ANDEAN VOLCANIC ZONE / ARGENTINA / LUINGO CALDERA / PUCARILLA IGNIMBRITE - JASIMANA UNIT/	-66.3208	-25.9219	49.29	VOLCANIC ROCK	DACITE			MIOCENE		63.97	0.924866	20.6612	40.4898	0.358	0.63	15.89	4.57				4.1	1.57	0.11	4.29	3.09	0.27	1.25				104	5						18.2		179	500	24.2	184	24.6	7.4	556	42
2021	[24922] ORTIZ A. (2021)	ANDEAN ARC / CENTRAL ANDEAN VOLCANIC ZONE / ARGENTINA / SOROCHE PORPHYRY//	-66.77	-25.12	49.29	VOLCANIC ROCK	RHYODACITE			MIOCENE		67.5	0.954474	19.726	42.7307	0.380787	0.5	15.4			4.3		3.9	1.8	0.1	4.1	2.8	0.2	0.7				99	30						16.7		164.5	432	21.9	113	23.8	11.8	537	45.3
2002	[5168] RICHARDS J. P. (2002)	ANDEAN ARC / CENTRAL ANDEAN VOLCANIC ZONE / ARGENTINA / CERRO DOS NACIONES//	-68.17	-25.17	60.43	VOLCANIC ROCK	DACITE			NEOGENE		66.3	0.966411	30.2857	44.5338	0.259434	0.5	15.4	3.7				3.9	1.5	0.1	2.7	3.6	0.2	1.7	25	7		70									110	424	14	69	10.6	5.3	560	25
2002	[5168] RICHARDS J. P. (2002)	ANDEAN ARC / CENTRAL ANDEAN VOLCANIC ZONE / ARGENTINA / CERRO DOS NACIONES//	-68.17	-25.17	60.43	VOLCANIC ROCK	ANDESITE			NEOGENE		57.8	0.847894	39.8421	43.698	0.107001	0.9	17.2	7.4				7.1	2.9	0.1	1.8	3.3	0.2	0.7	21	16		170									81	757	19	258	14.9	2.3	727	34
2002	[5168] RICHARDS J. P. (2002)	ANDEAN ARC / CENTRAL ANDEAN VOLCANIC ZONE / ARGENTINA / CERRO ESCORIAL//	-68.17	-25.17	60.43	VOLCANIC ROCK	ANDESITE, BASALTIC			MIOCENE		56.1	0.831873	19.3704	44.6294	0.137667	1.3	17.3	8.6				6.9	3.5	0.1	2	3.7	0.4	0.2	16	19		219									72	523	27	231	15.6	1.2	461	32
2002	[5168] RICHARDS J. P. (2002)	ANDEAN ARC / CENTRAL ANDEAN VOLCANIC ZONE / ARGENTINA / CERRO NEGRO//	-68.17	-25.17	60.43	VOLCANIC ROCK	DACITE			NEOGENE		61.5	0.915953	23.0909	41.52	0.165354	0.8	16.4	5.3				4.8	1.9	0.1	2.4	4	0.3	1.5	12	11		97									84	508	22	213	17.4	1.7	546	34
1997	[3992] WITTENBRINK R. (1997)	ANDEAN ARC / CENTRAL ANDEAN VOLCANIC ZONE / ARGENTINA/CHILE / CERRO LEON MUERTO/	-68.47	-25.45	60.43	VOLCANIC ROCK	NOT GIVEN			MIOCENE		57.93	0.930943	24.5455	38.5175	0.101852	0.75	19	6.86				6.77	2.17	0.15	1.8	3.74	0.38	0.73					12		12				20		55	540	22	180	14		507	27
1997	[3992] WITTENBRINK R. (1997)	ANDEAN ARC / CENTRAL ANDEAN VOLCANIC ZONE / ARGENTINA/CHILE / CERRO LEON MUERTO/	-68.47	-25.45	60.43	VOLCANIC ROCK	NOT GIVEN			MIOCENE		57.67	0.925462	22.375	38.4202	0.108007	0.77	19.07	6.92				6.89	2.18	0.14	1.78	3.74	0.38	0.14		11			14		14				20		58	537	24	178	14		506	24
1997	[3992] WITTENBRINK R. (1997)	ANDEAN ARC / CENTRAL ANDEAN VOLCANIC ZONE / ARGENTINA/CHILE / CERRO LEON MUERTO/	-68.47	-25.45	60.43	VOLCANIC ROCK	NOT GIVEN			MIOCENE		56.12	0.86568	29.85	37.9368	0.0737018	0.77	19.3	7.29				7.76	2.25	0.16	1.59	3.93	0.39	0.46		12			13		12				21		44	597	20	176	14		488	21
1997	[3992] WITTENBRINK R. (1997)	ANDEAN ARC / CENTRAL ANDEAN VOLCANIC ZONE / ARGENTINA/CHILE / CERRO LEON MUERTO/	-68.47	-25.45	60.43	VOLCANIC ROCK	NOT GIVEN			MIOCENE		56.4	0.880469	25.8696	38.7831	0.0739496	0.76	19.26	7.19				7.66	2.3	0.16	1.75	3.68	0.38	0.8		5.11			13		14				21		44	595	23	177	11.77	1.2	492	24
1997	[3992] WITTENBRINK R. (1997)	ANDEAN ARC / CENTRAL ANDEAN VOLCANIC ZONE / ARGENTINA/CHILE / CERRO LEON MUERTO/	-68.47	-25.45	60.43	VOLCANIC ROCK	NOT GIVEN			MIOCENE		56.78	0.878263	17.84	42.7429	0.11435	1.03	17.58	8.41				6.56	3.17	0.16	1.79	3.74	0.32	0.76		13			19		20	2			20		51	446	25	178	13		524	23
1997	[3992] WITTENBRINK R. (1997)	ANDEAN ARC / CENTRAL ANDEAN VOLCANIC ZONE / ARGENTINA/CHILE / CERRO LEON MUERTO/	-68.47	-25.45	60.43	VOLCANIC ROCK	NOT GIVEN			MIOCENE		57.63	0.866437	17.5	36.6758	0.136735	0.9	17.73	8.07				6.88	2.36	0.16	2.06	3.48	0.28	0.06		6.45			14		12				20		67	490	28	179	11.61	1.8	557	27
1997	[3992] WITTENBRINK R. (1997)	ANDEAN ARC / CENTRAL ANDEAN VOLCANIC ZONE / ARGENTINA/CHILE / CERRO LEON MUERTO/	-68.47	-25.45	60.43	VOLCANIC ROCK	NOT GIVEN			MIOCENE		57.24	0.897758	18.75	35.3942	0.102857	0.88	18.58	7.7				6.85	2.13	0.16	1.9	3.76	0.34	0.23		12			14		12				21		54	525	28	187	13	4	499	27
1997	[3992] WITTENBRINK R. (1997)	ANDEAN ARC / CENTRAL ANDEAN VOLCANIC ZONE / ARGENTINA/CHILE / CERRO LEON MUERTO/	-68.47	-25.45	60.43	VOLCANIC ROCK	NOT GIVEN			MIOCENE		56.17	0.876891	26.9091	39.046	0.0827703	0.82	19.43	7.08				7.71	2.29	0.15	1.73	3.81	0.36	0.33		10			13						20		49	592	22	187	13		457	29
1997	[3992] WITTENBRINK R. (1997)	ANDEAN ARC / CENTRAL ANDEAN VOLCANIC ZONE / ARGENTINA/CHILE / CERRO LEON MUERTO/	-68.47	-25.45	60.43	VOLCANIC ROCK	NOT GIVEN			MIOCENE		60.85	0.87173	35.7059	39.5125	0.092257	0.8	16.93	6.67				5.94	2.2	0.11	1.81	4.05	0.2	0.32		8			19		12	2			19		56	607	17	123	8		619	15
1997	[3992] WITTENBRINK R. (1997)	ANDEAN ARC / CENTRAL ANDEAN VOLCANIC ZONE / ARGENTINA/CHILE / CERRO LEON MUERTO/	-68.47	-25.45	60.43	VOLCANIC ROCK	NOT GIVEN			MIOCENE		57.3	0.905396	22.3636	39.1626	0.097561	0.82	18.8	7.23				7	2.35	0.15	2	3.57	0.33	0.75		12			13		13				19		48	492	22	178	13		489	21
1997	[3992] WITTENBRINK R. (1997)	ANDEAN ARC / CENTRAL ANDEAN VOLCANIC ZONE / ARGENTINA/CHILE / CERRO LEON MUERTO/	-68.3675	-25.8839	60.43	VOLCANIC ROCK	NOT GIVEN			MIOCENE		57.29	0.909784	20.7083	39.5972	0.0985915	0.82	18.86	7.16				6.9	2.37	0.15	2.03	3.64	0.32	0.65		5.61			12		15				20		49	497	24	176	11.54	1.41	503	22
1997	[3992] WITTENBRINK R. (1997)	ANDEAN ARC / CENTRAL ANDEAN VOLCANIC ZONE / ARGENTINA/CHILE / CERRO LEON MUERTO/	-68.47	-25.45	60.43	VOLCANIC ROCK	NOT GIVEN			MIOCENE		57.53	0.918038	21.32	38.9437	0.0825516	0.82	18.89	6.8				6.94	2.19	0.15	1.76	3.68	0.35	1.15		8.8			12		12	5.7			20		44	533	25	204	12.2	1.55	560	25
1997	[3992] WITTENBRINK R. (1997)	ANDEAN ARC / CENTRAL ANDEAN VOLCANIC ZONE / ARGENTINA/CHILE / CERRO LEON MUERTO/	-68.47	-25.45	60.43	VOLCANIC ROCK	NOT GIVEN			MIOCENE		57.29	0.861103	20.6538	42.8276	0.0595903	1.23	18.26	9.65				7.94	3.65	0.16	1.33	3.24	0.31	1.25		15			11		25	8					32	537	26	196			451	22
1997	[3992] WITTENBRINK R. (1997)	ANDEAN ARC / CENTRAL ANDEAN VOLCANIC ZONE / CHILE / COLORADO DEL AZUFRE//	-68.93	-25.37	60.43	VOLCANIC ROCK	NOT GIVEN			NEOGENE		63.63	0.939937	26.7368	36.3223	0.173228	0.66	16.63	5.59				5.18	1.61	0.15	2.28	3.53	0.28	1.26		4.19			14		6				19		88	508	19	220	15.02	1.65	734	32
1997	[3992] WITTENBRINK R. (1997)	ANDEAN ARC / CENTRAL ANDEAN VOLCANIC ZONE / CHILE / COLORADO DEL AZUFRE//	-68.93	-25.37	60.43	VOLCANIC ROCK	NOT GIVEN			NEOGENE		62.72	0.934066	30	38.1664	0.118333	0.68	17.25	5.23				5.07	1.63	0.1	2.74	3.82	0.29	0.82					15						21		71	600	20	162	14		622	21
1997	[3992] WITTENBRINK R. (1997)	ANDEAN ARC / CENTRAL ANDEAN VOLCANIC ZONE / CHILE / COLORADO DEL AZUFRE//	-68.93	-25.37	60.43	VOLCANIC ROCK	NOT GIVEN			NEOGENE		58.62	0.845193	38.875	41.8585	0.0803859	0.95	16.82	7.73				6.77	2.81	0.13	2.09	3.24	0.34	0.79		9			43		18	11			20		50	622	16	173	12		821	26
1997	[3992] WITTENBRINK R. (1997)	ANDEAN ARC / CENTRAL ANDEAN VOLCANIC ZONE / CHILE / COLORADO DEL AZUFRE//	-68.93	-25.37	60.43	VOLCANIC ROCK	NOT GIVEN			NEOGENE		63.05	0.853744	23.1905	37.3849	0.13963	0.61	16.42	5.44				6.07	1.64	0.13	2.74	3.18	0.25	1.47					15						18		68	487	21	200	16		679	32
1997	[3992] WITTENBRINK R. (1997)	ANDEAN ARC / CENTRAL ANDEAN VOLCANIC ZONE / CHILE / COLORADO DEL AZUFRE//	-68.93	-25.37	60.43	VOLCANIC ROCK	NOT GIVEN			NEOGENE		58.83	0.8894	30.9474	39.7319	0.105442	0.97	17.5	7.27				6.19	2.42	0.12	2.34	3.58	0.31	0.99		9			16		13				21		62	588	19	192	14	6	700	30
1997	[3992] WITTENBRINK R. (1997)	ANDEAN ARC / CENTRAL ANDEAN VOLCANIC ZONE / CHILE / COLORADO DEL AZUFRE//	-68.93	-25.37	60.43	VOLCANIC ROCK	NOT GIVEN			NEOGENE		58.39	0.853356	27.8095	37.7189	0.104452	1.06	16.93	8.11				6.61	2.48	0.13	2.15	3.34	0.32	0.64		10			17		15				21		61	584	21	184	14		681	32
1997	[3992] WITTENBRINK R. (1997)	ANDEAN ARC / CENTRAL ANDEAN VOLCANIC ZONE / CHILE / COLORADO DEL AZUFRE//	-68.93	-25.37	60.43	VOLCANIC ROCK	NOT GIVEN			NEOGENE		60.69	0.922515	24.8261	39.2699	0.124343	0.88	16.94	6.83				5.38	2.23	0.13	2.7	3.44	0.3	0.54					14		12				21		71	571	23	224	16		764	36
1997	[3992] WITTENBRINK R. (1997)	ANDEAN ARC / CENTRAL ANDEAN VOLCANIC ZONE / CHILE / COLORADO DEL AZUFRE//	-68.93	-25.37	60.43	VOLCANIC ROCK	NOT GIVEN			NEOGENE		64.12	0.910551	26.1818	34.7957	0.137153	0.62	16.39	5.27				5.04	1.42	0.13	2.48	3.74	0.31	1.01					17						19		79	576	22	255	19		825	35
1997	[3992] WITTENBRINK R. (1997)	ANDEAN ARC / CENTRAL ANDEAN VOLCANIC ZONE / CHILE / COLORADO DEL AZUFRE//	-68.93	-25.37	60.43	VOLCANIC ROCK	NOT GIVEN			NEOGENE		57.94	0.854597	30.8889	37.7065	0.0953237	1.07	18.06	7.1				7.09	2.17	0.11	1.87	3.78	0.35	0.24		9			20		19				22		53	556	18	190	16	1	607	27
1997	[3992] WITTENBRINK R. (1997)	ANDEAN ARC / CENTRAL ANDEAN VOLCANIC ZONE / CHILE / COLORADO DEL AZUFRE//	-68.93	-25.37	60.43	VOLCANIC ROCK	NOT GIVEN			NEOGENE		64.33	0.930933	25.1818	35.1743	0.146209	0.6	16.53	5.11				4.87	1.4	0.12	2.51	3.76	0.3	1.05					13						19		81	554	22	256	19		817	41
1997	[3992] WITTENBRINK R. (1997)	ANDEAN ARC / CENTRAL ANDEAN VOLCANIC ZONE / CHILE / COLORADO DEL AZUFRE//	-68.93	-25.37	60.43	VOLCANIC ROCK	NOT GIVEN			NEOGENE		63.93	0.9321	25.8636	35.7693	0.123023	0.61	16.79	5.05				4.93	1.42	0.12	2.54	3.83	0.31	0.85					13						19		70	569	22	253	17		775	39
1997	[3992] WITTENBRINK R. (1997)	ANDEAN ARC / CENTRAL ANDEAN VOLCANIC ZONE / CHILE / COLORADO DEL AZUFRE//	-68.93	-25.37	60.43	VOLCANIC ROCK	NOT GIVEN			NEOGENE		60.88	0.853219	28.2632	41.6412	0.130354	1.04	16.09	7.05				6.05	2.54	0.1	2.26	3.29	0.24	0.95		11			31		20	11			21		70	537	19	149	13		613	25
1997	[3992] WITTENBRINK R. (1997)	ANDEAN ARC / CENTRAL ANDEAN VOLCANIC ZONE / CHILE / COLORADO DEL AZUFRE//	-68.93	-25.37	60.43	VOLCANIC ROCK	NOT GIVEN			NEOGENE		57.18	0.852819	38.4118	38.511	0.0796325	1.09	17.52	8.19				6.84	2.59	0.14	2.08	3.56	0.35	0.67		9			21		20	5			22		52	653	17	171	14		784	28
1997	[3992] WITTENBRINK R. (1997)	ANDEAN ARC / CENTRAL ANDEAN VOLCANIC ZONE / CHILE / COLORADO DEL AZUFRE//	-68.93	-25.37	60.43	VOLCANIC ROCK	NOT GIVEN			NEOGENE		58.1	0.880114	24.5238	41.8201	0.106796	0.92	17.31	7.88				6.51	2.86	0.14	2.19	3.32	0.31	0.54		11			24		20				20		55	515	21	175	13		606	28
1997	[3992] WITTENBRINK R. (1997)	ANDEAN ARC / CENTRAL ANDEAN VOLCANIC ZONE / CHILE / COLORADO DEL AZUFRE//	-68.93	-25.37	60.43	VOLCANIC ROCK	NOT GIVEN			NEOGENE		62.29	0.896662	20.4286	33.7589	0.172494	0.76	16.69	6.14				5.52	1.58	0.15	2.59	3.51	0.3	1.64		4.94			16		10				18		74	429	21	206	14.86	2.11	733	29
1997	[3992] WITTENBRINK R. (1997)	ANDEAN ARC / CENTRAL ANDEAN VOLCANIC ZONE / CHILE / COLORADO DEL AZUFRE//	-68.93	-25.37	60.43	VOLCANIC ROCK	NOT GIVEN			NEOGENE		59.34	0.922265	26.7826	33.5252	0.102273	0.98	18.04	6.99				6.22	1.78	0.11	1.97	3.72	0.37	0.81		11			14		24				21		63	616	23	195	16		671	27
1997	[3992] WITTENBRINK R. (1997)	ANDEAN ARC / CENTRAL ANDEAN VOLCANIC ZONE / CHILE / COLORADO DEL AZUFRE//	-68.93	-25.37	60.43	VOLCANIC ROCK	NOT GIVEN			NEOGENE		59.65	0.898416	24.2727	38.543	0.106742	0.82	17.29	7.2				6.15	2.28	0.15	2.1	3.52	0.37	0.54					17		13				19		57	534	22	192	14		622	33
1997	[3992] WITTENBRINK R. (1997)	ANDEAN ARC / CENTRAL ANDEAN VOLCANIC ZONE / CHILE / COLORADO DEL AZUFRE//	-68.93	-25.37	60.43	VOLCANIC ROCK	NOT GIVEN			NEOGENE		62.07	0.96113	41.3571	39.0347	0.117444	0.66	17.01	4.98				4.91	1.61	0.1	2.48	3.7	0.28	1.18		7.4			6		11	6					68	579	14	180			639
1997	[3992] WITTENBRINK R. (1997)	ANDEAN ARC / CENTRAL ANDEAN VOLCANIC ZONE / CHILE / COLORADO DEL AZUFRE//	-68.93	-25.37	60.43	VOLCANIC ROCK	NOT GIVEN			NEOGENE		61.9	0.973439	29.6316	39.8613	0.0817052	0.6	17.2	4.96				4.97	1.66	0.12	2.14	3.84	0.3	1.07		6			6		7.2	2			21		46	563	19	272	15.4	1.08	822	36
1997	[3992] WITTENBRINK R. (1997)	ANDEAN ARC / CENTRAL ANDEAN VOLCANIC ZONE / CHILE / COLORADO DEL AZUFRE//	-68.93	-25.37	60.43	VOLCANIC ROCK	NOT GIVEN			NEOGENE		56.28	0.908897	31.0556	42.2448	0.0572451	1.07	18.6	6.39				6.86	2.36	0.11	1.73	3.72	0.33	0.68		8.8			7		18	5					32	559	18	222			623	27
1997	[3992] WITTENBRINK R. (1997)	ANDEAN ARC / CENTRAL ANDEAN VOLCANIC ZONE / CHILE / COLORADO DEL AZUFRE//	-68.93	-25.37	60.43	VOLCANIC ROCK	NOT GIVEN			NEOGENE		61.46	0.966066	49.3333	40.4963	0.10473	0.73	17.6	5.5				5.3	1.89	0.1	2.26	3.73	0.26	1.04		5.9			9		10	3			23		62	592	12	176	11.2	2.43	632	23
1997	[3992] WITTENBRINK R. (1997)	ANDEAN ARC / CENTRAL ANDEAN VOLCANIC ZONE / CHILE / COLORADO DEL AZUFRE//	-68.93	-25.37	60.43	VOLCANIC ROCK	NOT GIVEN			NEOGENE		61.35	0.876047	31	40.2238	0.114919	0.59	17.02	5.18				5.83	1.76	0.13	2.67	3.61	0.24	1.44		5.7			5		9	4					57	496	16	218			690	30
1997	[3992] WITTENBRINK R. (1997)	ANDEAN ARC / CENTRAL ANDEAN VOLCANIC ZONE / CHILE / COLORADO DEL AZUFRE//	-68.93	-25.37	60.43	VOLCANIC ROCK	NOT GIVEN			NEOGENE		56.47	0.879141	31.7368	40.7251	0.0829187	1.03	17.26	7.61				6.64	2.64	0.13	2	3.28	0.31	0.99		9.9			4		17	6			22		50	603	19	223	12.8	1.25	676	29
1999	[5061] TRUMBULL R. B. (1999)	ANDEAN ARC / CENTRAL ANDEAN VOLCANIC ZONE / CHILE / COLORADO//	-68.5792	-25.8342	60.43	VOLCANIC ROCK	ANDESITE			MIOCENE		62.3	0.896662	20.4286	33.7589	0.172494	0.76	16.69	6.14				5.52	1.58	0.15	2.59	3.51	0.3						16			0					74	429	21	206	14	2.1	733	29
1999	[5061] TRUMBULL R. B. (1999)	ANDEAN ARC / CENTRAL ANDEAN VOLCANIC ZONE / CHILE / DOS CRATERES//	-68.6	-25.6	60.43	VOLCANIC ROCK	ANDESITE			NEOGENE		62.2	0.904669	14.5769	42.7639	0.3219	1.02	16.46	5.54				5.03	2.09	0.12	2.95	3.56	0.29						11			13					122	379	26	223	15	6.4	559	31
1997	[3992] WITTENBRINK R. (1997)	ANDEAN ARC / CENTRAL ANDEAN VOLCANIC ZONE / CHILE / LASTARRIA//	-68.52	-25.17	60.43	VOLCANIC ROCK	NOT GIVEN			HOLOCENE		64.33	0.845075	18.12	41.6801	0.331126	0.73	15.18	5.57				5.16	2.01	0.1	3.08	3.19	0.2	0.24		7.36			10		13	2			18		150	453	25	155	12.92	11.03	430	36
1997	[3992] WITTENBRINK R. (1997)	ANDEAN ARC / CENTRAL ANDEAN VOLCANIC ZONE / CHILE / LASTARRIA//	-68.52	-25.17	60.43	VOLCANIC ROCK	NOT GIVEN			HOLOCENE		64.35	0.942883	14.0968	44.3197	0.361556	0.7	15.93	5.25				4.71	2.11	0.1	3.29	2.9	0.21	1.21					26								158	437	31	181	14		477
1997	[3992] WITTENBRINK R. (1997)	ANDEAN ARC / CENTRAL ANDEAN VOLCANIC ZONE / CHILE / LASTARRIA//	-68.52	-25.17	60.43	VOLCANIC ROCK	NOT GIVEN			HOLOCENE		63.05	0.892	15.7742	44.528	0.274029	0.73	16.07	5.65				5.27	2.29	0.12	3.02	3.14	0.21	0.2					15								134	489	31	184	15		464
1997	[3992] WITTENBRINK R. (1997)	ANDEAN ARC / CENTRAL ANDEAN VOLCANIC ZONE / CHILE / LASTARRIA//	-68.52	-25.17	60.43	VOLCANIC ROCK	NOT GIVEN			HOLOCENE		63.78	0.904664	13.9394	44.432	0.317391	0.71	15.97	5.35				5.06	2.16	0.1	3.22	3.02	0.2	0.73					14								146	460	33	180	14		477
1997	[3992] WITTENBRINK R. (1997)	ANDEAN ARC / CENTRAL ANDEAN VOLCANIC ZONE / CHILE / LASTARRIA//	-68.52	-25.17	60.43	VOLCANIC ROCK	NOT GIVEN			HOLOCENE		61.56	0.868935	14.7576	44.9579	0.252567	0.74	16.28	6.28				5.71	2.59	0.11	2.87	3.19	0.22	0.56					19			11					123	487	33	184	13		455
1997	[3992] WITTENBRINK R. (1997)	ANDEAN ARC / CENTRAL ANDEAN VOLCANIC ZONE / CHILE / LASTARRIA//	-68.52	-25.17	60.43	VOLCANIC ROCK	NOT GIVEN			HOLOCENE		61.79	0.853513	25.2857	0	0.190207	1.11	16.72	7.38				6.18		0.1	2.52	3.42	0.32	-0.09					82			33					101	531	21	204	14		533
1997	[3992] WITTENBRINK R. (1997)	ANDEAN ARC / CENTRAL ANDEAN VOLCANIC ZONE / CHILE / LASTARRIA//	-68.52	-25.17	60.43	VOLCANIC ROCK	NOT GIVEN			HOLOCENE		65.74	0.906072	77.625	44.7142	0.117552	0.7	15.82	3.82				3.69	1.56	0.05	2.82	4.68	0.25			5.3			20		10.6	14			22		73	621	8	230	7.4	1.61	770	36
2010	[13695] MAMANI M. (2010)	ANDEAN ARC / CENTRAL ANDEAN VOLCANIC ZONE / CHILE / LASTARRIA//	-68.56	-25.1397	60.43	VOLCANIC ROCK	ANDESITE			QUATERNARY		62.8	0.869211	36.5789	44.9572	0.0661871	0.721	16	5.48				5.19	2.26	0.107	3.03	3.46	0.18	0.47185				101	6		14	5	46	86			46	695	19	150	7		854
1995	[5380] SHINJO R. (1995)	RYUKYU ARC / OKINAWA TROUGH / AGUNI-JIMA / FUDENZAKI FORMATION//	127.14	26.35	25.07	VOLCANIC ROCK	ANDESITE			MIOCENE		56.41	0.891044	5.66667	40.1568	0.10362	1.11	19.05			7.65		7.41	2.88	0.13	1.15	4.05	0.17	0.87			25.2		167	6		20	4					22.9	221	39	145	5		113
1995	[5380] SHINJO R. (1995)	RYUKYU ARC / OKINAWA TROUGH / AGUNI-JIMA / HIGASHI FORMATION//	127.14	26.35	25.07	VOLCANIC ROCK	ANDESITE			MIOCENE		56.7	0.924051	7.12121	34.5764	0.115745	1.03	18.62			8.87		7.3	2.63	0.17	1.02	3.51	0.14				37.6		210	7		19	0					27.2	235	33	120	4.9		142
2011	[15311] GUZMAN S. R. (2011)	ANDEAN ARC / CENTRAL ANDEAN VOLCANIC ZONE / ARGENTINA / LUINGO CALDERA / LAVA I UNIT/	-66.6038	-26.1393	50.91	VOLCANIC ROCK	TRACHYANDESITE			MIOCENE		59.68	0.887477	26.1754	44.7987	0.217158	0.7	16.89	5.32				4.95	2.18	0.14	4.42	3.19	0.42	1.38				102							19.7		162	746	28.5	263	25.7	5.1	886	44.7
2011	[15311] GUZMAN S. R. (2011)	ANDEAN ARC / CENTRAL ANDEAN VOLCANIC ZONE / ARGENTINA / LUINGO CALDERA / LAVA I UNIT/	-66.6067	-26.1432	50.91	VOLCANIC ROCK	TRACHYANDESITE			MIOCENE		60.87	0.9452	17.0988	44.7527	0.368231	0.69	16.5	5.77				4.48	2.36	0.07	4.56	2.66	0.42	2.08				101							19.2		204	554	32.4	262	25.6	2.7	919	46.9
2011	[15311] GUZMAN S. R. (2011)	ANDEAN ARC / CENTRAL ANDEAN VOLCANIC ZONE / ARGENTINA / LUINGO CALDERA / LAVA II UNIT/	-66.7143	-26.1553	50.91	VOLCANIC ROCK	TRACHYDACITE			MIOCENE		64.16	0.943412	18.25	41.5867	0.390411	0.62	15.52	4.59				4.11	1.65	0.07	3.69	3.03	0.27	1.67				95	56						20.8		171	438	24	219	14.8	39	644	45.2
2011	[15311] GUZMAN S. R. (2011)	ANDEAN ARC / CENTRAL ANDEAN VOLCANIC ZONE / ARGENTINA / LUINGO CALDERA / PUCARILLA IGNIMBRITE - ARREMO UNIT/	-66.4641	-26.1621	50.91	VOLCANIC ROCK	DACITE			MIOCENE		62.51	0.918426	20.2158	44.8184	0.297153	0.66	16.52	4.95				4.64	2.03	0.11	3.9	3.24	0.27	1.38				112	8						20.8		167	562	27.8	198	25.9	9.3	549	43.4
2011	[15311] GUZMAN S. R. (2011)	ANDEAN ARC / CENTRAL ANDEAN VOLCANIC ZONE / ARGENTINA / LUINGO CALDERA / PUCARILLA IGNIMBRITE - JASIMANA UNIT/	-66.7477	-26.1563	50.91	VOLCANIC ROCK	DACITE			MIOCENE		63.63	0.943377	20.9125	37.6075	0.318182	0.66	16.4	4.83				4.01	1.47	0.1	4.31	3.3	0.29	0.82				85	7						19.4		175	550	26.3	205	25.3	6.6	654	41.5
2011	[15311] GUZMAN S. R. (2011)	ANDEAN ARC / CENTRAL ANDEAN VOLCANIC ZONE / ARGENTINA / LUINGO CALDERA / PUCARILLA IGNIMBRITE - JASIMANA UNIT/	-66.4633	-26.1585	50.91	VOLCANIC ROCK	DACITE			MIOCENE		63.65	0.91515	19.9621	42.3038	0.313093	0.66	16.45	4.97				4.52	1.84	0.11	4.06	3.26	0.28	0.7				99	7						20.6		165	527	26.4	203	23.7	6.1	555	41.5
2010	[19864] MONTERO-LOPEZ C. (2010)	ANDEAN ARC / CENTRAL ANDEAN VOLCANIC ZONE / ARGENTINA / CERRO BLANCO//	-67.42	-27	55.63	VOLCANIC ROCK	NOT GIVEN			HOLOCENE		66.7	0.8169	30.8819	37.1964	0.249382	0.46	14.91		3.16			3.47	1.05	0.06	4.21	4.49	0.14	1.8		6		66				12	14.9	21	18.2		110.9	444.7	14.4	126.3	17.1	1.1	605.2	34.4
2010	[14850] KAY S. M. (2010)	ANDEAN ARC / CENTRAL ANDEAN VOLCANIC ZONE / ARGENTINA / CERRO ROSADO//	-67.6892	-26.4443	55.63	VOLCANIC ROCK	NOT GIVEN	7000000	8000000	MIOCENE		65.7	0.79323	28.7333	43.7576	0.264501	0.454	15.174			2.85		2.973	1.244	0.064	3.98	5.724	0.129	2.15		6.68			22.03		8.455	13.53					114	431	15	139	14	1.3261	722	37.8001
2010	[14850] KAY S. M. (2010)	ANDEAN ARC / CENTRAL ANDEAN VOLCANIC ZONE / ARGENTINA / CERRO ROSADO//	-67.7589	-26.6692	55.63	VOLCANIC ROCK	NOT GIVEN	7300000	7300000	MIOCENE		63.82	0.922638	59.5091	42.2457	0.146654	0.89	16.61			4.24		4.55	1.74	0.05	2.5	4.27	0.26	0.7		7.377			19.761		9	11.386					96	654.6	11	139	17	4.33	776	42.4
2010	[19864] MONTERO-LOPEZ C. (2010)	ANDEAN ARC / CENTRAL ANDEAN VOLCANIC ZONE / ARGENTINA / ROSADA IGNIMBRITE//	-67.7286	-26.5504	55.63	VOLCANIC ROCK	DACITE			MIOCENE		68	0.927187	25.2404	43.1148	0.302446	0.49	14.79		3.41			2.95	1.45	0.06	3.87	3.89	0.17	0.8		7		63	13			20	11.4	11	19.7		139.7	461.9	18.3	155.3	18.7	4.7	675	41
2010	[14850] KAY S. M. (2010)	ANDEAN ARC / CENTRAL ANDEAN VOLCANIC ZONE / ARGENTINA / CERRO ROSADO//	-68.3294	-26.1342	55.27	VOLCANIC ROCK	NOT GIVEN	7000000	8000000	MIOCENE		66.83	0.790394	35.0858	43.0927	0.263639	0.55	14.91			3.06		3.21	1.3	0.04	3.51	5.61				6.797			18.513		8.911	11.874					111	421.03	12	179	18	1.272	690	36.652
2022	[25791] GROSSE P. (2022)	ANDEAN ARC / CENTRAL ANDEAN VOLCANIC ZONE / ARGENTINA / PEINADO//	-68.0833	-26.5925	55.27	VOLCANIC ROCK	DACITE			QUATERNARY		65.69	0.744186	46.9091	44.9186	0.368494	0.45	13.47	2.72				4.48	1.12	0.05	4.03	3.4	0.15	4.54				38			4.3	3.3	12	40	16.6	43.2	133.1	361.2	7.7	170.6	9.7	4.4	798	38.3
2011	[15005] GOSS A. R.(2011) [GeoReM [6124] ]	ANDEAN ARC / CENTRAL ANDEAN VOLCANIC ZONE / CHILE / INCAPILLO CALDERA / INCAPILLO PUMICE/	-68.86	-27.939	56.42	VOLCANIC ROCK	NOT GIVEN			PLEISTOCENE		67.03	0.917557	68.125	41.2062	0.26055	0.37	15.32			2.06		2.98	0.81	0.04	3.9	4.29	0.16			3.4		38	4		4	2	7	70			142	545	8	212	14	6.4	738	36.8
2018	[21752] KUTTEROLF S.(2018) [GeoReM [11418] ]	IZU-BONIN ARC / IZU-BONIN FORE-ARC / SITE U1439///	142.608	28.4075	6.89	VOLCANIC ROCK	NOT GIVEN			NEOGENE		66.8918	0.890135	7.25488	30.1199	0.155491	0.866732	15.0801			5.15539		3.94806	1.24666	0.144847	1.59654	4.8845	0.18541			14.62	17.695											35.85	230.56	31.78	164.255	7.665	1.5885	310.325
2018	[21752] KUTTEROLF S.(2018) [GeoReM [11418] ]	IZU-BONIN ARC / IZU-BONIN FORE-ARC / SITE U1439///	142.608	28.4075	6.89	VOLCANIC ROCK	NOT GIVEN			NEOGENE		56.3285	0.716271	8.15568	36.28	0.0312167	1.03872	14.6622			12.1862		9.05723	3.89265	0.217134	0.368417	2.19098	0.0579438			6.25333	48.0533											6.74333	216.017	26.4867	40	0.383	0.816667	114.427
2018	[21752] KUTTEROLF S.(2018) [GeoReM [11418] ]	IZU-BONIN ARC / IZU-BONIN FORE-ARC / SITE U1439///	142.608	28.4075	6.89	VOLCANIC ROCK	NOT GIVEN			NEOGENE		61.2121	0.812402	9.72356	30.237	0.0554314	0.790395	15.8402			8.32658		6.97569	2.02473	0.181283	0.96506	3.50797	0.175976			15.31	39.385											19.975	360.355	37.06	80.855	1.014	1.0325	251.745
2018	[21752] KUTTEROLF S.(2018) [GeoReM [11418] ]	IZU-BONIN ARC / IZU-BONIN FORE-ARC / SITE U1439///	142.608	28.4075	6.89	VOLCANIC ROCK	NOT GIVEN			NEOGENE		65.572	0.855235	6.20035	31.7458	0.17155	0.699062	15.0072			5.83028		4.58661	1.52136	0.180102	2.24034	4.12362	0.239333			19.83	24.1967											52.4	305.45	49.2633	196.103	4.69	1.85	559.53
2018	[21752] KUTTEROLF S.(2018) [GeoReM [11418] ]	IZU-BONIN ARC / IZU-BONIN FORE-ARC / SITE U1439///	142.608	28.4075	6.89	VOLCANIC ROCK	NOT GIVEN			NEOGENE		66.496	0.92808	7.38212	33.9962	0.143471	0.659597	15.6235			5.08595		4.83506	1.46967	0.142933	1.78087	3.71776	0.188628			4.23	8.05667											14.69	102.39	13.87	51.44	0.607667	0.691333	78.9933
2018	[21752] KUTTEROLF S.(2018) [GeoReM [11418] ]	IZU-BONIN ARC / IZU-BONIN FORE-ARC / SITE U1440///	142.754	28.4498	6.89	VOLCANIC ROCK	NOT GIVEN			NEOGENE		56.6291	0.704741	7.76443	36.0913	0.0387474	1.1787	14.6408			11.5933		8.28791	3.67312	0.233558	0.454667	3.16965	0.139061			7.76	37.985											7.95	205.175	26.425	62.76	0.938	0.291	138.125
2018	[21752] KUTTEROLF S.(2018) [GeoReM [11418] ]	IZU-BONIN ARC / IZU-BONIN FORE-ARC / SITE U1440///	142.754	28.4498	6.89	VOLCANIC ROCK	NOT GIVEN			NEOGENE		56.6197	0.716631	8.62415	37.3806	0.020202	1.12785	15.1108			10.9834		8.51703	3.67841	0.263791	0.312574	3.19909	0.187198			7.5	51.3267											4.36667	216.15	25.0633	38.62	0.360333	0.250667	51.5467
2018	[21752] KUTTEROLF S.(2018) [GeoReM [11418] ]	IZU-BONIN ARC / IZU-BONIN FORE-ARC / SITE U1441///	142.257	28.4273	6.89	VOLCANIC ROCK	NOT GIVEN			NEOGENE		63.4844	0.864218	5.99199	33.8234	0.0752905	0.737383	15.8055			6.89619		5.81742	1.97746	0.15728	0.908574	4.09024	0.125516			16.77	23.6967											13.3267	177.003	29.54	73.1267	1.009	1.06633	185.617
2018	[21752] KUTTEROLF S.(2018) [GeoReM [11418] ]	IZU-BONIN ARC / IZU-BONIN FORE-ARC / SITE U1441///	142.257	28.4273	6.89	VOLCANIC ROCK	NOT GIVEN			NEOGENE		57.1865	0.768522	7.83474	35.8352	0.0548703	1.18427	14.9828			11.5526		8.0257	3.61975	0.186893	0.339359	2.75775	0.164431			14.73	36.9333											12.07	219.973	28.0767	79.3033	1.95	0.536667	184.3
2018	[21752] KUTTEROLF S.(2018) [GeoReM [11418] ]	IZU-BONIN ARC / IZU-BONIN FORE-ARC / SITE U1441///	142.257	28.4273	6.89	VOLCANIC ROCK	NOT GIVEN			NEOGENE		57.6685	0.805157	5.72282	37.1401	0.0461564	1.20603	15.1788			11.1761		8.18845	3.70465	0.232033	0.393639	2.15094	0.100837			10.1633	43.74											8.31	180.04	31.46	77.2	0.904333	1.00667	142.82
2018	[21752] KUTTEROLF S.(2018) [GeoReM [11418] ]	IZU-BONIN ARC / IZU-BONIN FORE-ARC / SITE U1441///	142.257	28.4273	6.89	VOLCANIC ROCK	NOT GIVEN			NEOGENE		56.3128	0.719362	8.01546	34.2152	0.0248387	1.11991	14.7888			12.2512		8.91167	3.57486	0.20085	0.377453	2.39942	0.0630242			7.56333	68.8933											4.98	200.493	25.0133	35.81	0.338333	0.683	89.17
2018	[21752] KUTTEROLF S.(2018) [GeoReM [11418] ]	IZU-BONIN ARC / IZU-BONIN FORE-ARC / SITE U1441///	142.257	28.4273	6.89	VOLCANIC ROCK	NOT GIVEN			NEOGENE		56.472	0.720108	9.49796	36.0069	0.0271755	1.0647	14.5771			12.2399		8.85681	3.86383	0.223962	0.355732	2.28274	0.0630957			8.16	49.28											5.27667	194.17	20.4433	27.4967	0.237667	0.652	87.8133
2018	[21752] KUTTEROLF S.(2018) [GeoReM [11418] ]	IZU-BONIN ARC / IZU-BONIN FORE-ARC / SITE U1441///	142.257	28.4273	6.89	VOLCANIC ROCK	NOT GIVEN			NEOGENE		66.5256	0.932669	6.17797	31.7808	0.27018	0.866637	15.6768			4.8632		3.676	1.27106	0.136795	1.76773	4.99181	0.224348			24.505	13.305											51.21	189.54	30.68	194.655	7.91	1.965	378.035
2018	[21752] KUTTEROLF S.(2018) [GeoReM [11418] ]	IZU-BONIN ARC / IZU-BONIN FORE-ARC / SITE U1441///	142.257	28.4273	6.89	VOLCANIC ROCK	NOT GIVEN			NEOGENE		59.1906	0.776461	8.48042	31.272	0.0342117	0.987732	14.6809			11.1949		7.82502	2.85779	0.22785	0.362463	2.60684	0.065751			9.38333	47.25											6.79	198.47	23.4033	34.8067	0.382	0.704	176.663
2018	[21752] KUTTEROLF S.(2018) [GeoReM [11418] ]	IZU-BONIN ARC / IZU-BONIN FORE-ARC / SITE U1441///	142.257	28.4273	6.89	VOLCANIC ROCK	NOT GIVEN			NEOGENE		56.8693	0.715048	7.63805	33.3921	0.0781615	1.09983	14.707			11.8786		8.23354	3.34094	0.194854	0.468056	3.0952	0.112583			17.5567	45.92											22.8333	292.13	38.2467	84.5433	0.956667	1.445	235.19
2018	[21752] KUTTEROLF S.(2018) [GeoReM [11418] ]	IZU-BONIN ARC / IZU-BONIN FORE-ARC / SITE U1442///	142.622	28.4096	6.89	VOLCANIC ROCK	NOT GIVEN			NEOGENE		66.1044	0.881967	9.70269	31.1761	0.186368	0.635203	15.5352			4.50565		2.96529	1.14505	0.193294	3.6866	5.00455	0.224645			22.0033	13.92											72.62	389.66	40.16	191.24	8.30333	1.39467	1241.68
2011	[15005] GOSS A. R.(2011) [GeoReM [6124] ]	ANDEAN ARC / CENTRAL ANDEAN VOLCANIC ZONE / CHILE / INCAPILLO CALDERA / SOUTHERN INCAPILLO DOME/	-68.848	-28.038	56.31	VOLCANIC ROCK	NOT GIVEN			PLEISTOCENE		65.5	0.91824	82.1111	44.0397	0.129905	0.73	16.37		2.01	3.42	1.61	3.61	1.51	0.05	3.37	4.63	0.25			5.2		68	24		8	10	15	90			96	739	9	270	9	1.6	1042	44.9
2022	[26107] DU DE-HONG (2022)	ANDEAN ARC / CENTRAL ANDEAN VOLCANIC ZONE / CHILE / MARICUNGA VOLCANIC BELT//	-69.168	-28.001	54.67	VOLCANIC ROCK	TRACHYANDESITE			PLIOCENE-MIOCENE		61.9	0.866075	74.9091	44.0318	0.0788835	0.89	16.82			4.35		4.73	1.92	0.06	2.9	4.67	0.3			6.5		89	25		10	9	16	85			65	824	11	289	10	1	1033	46.1
2012	[15954] HARAGUCHI S. (2012)	KYUSHU-PALAU RIDGE / MIYAZALI / DREDGE 2///	132.697	30.8395	9.43	VOLCANIC ROCK	ANDESITE, BASALTIC, 2-PYROXENE	25000000	25000000	MIOCENE		65.856	0.958627	6.83654	35.5787	0.129686	0.905	15.58	5.587				4	1.558	0.158	2.132	4.056	0.256	2.61			20.4626		31.092	3.39		5.71	7.33479	14.4941	110.695			40.3751	311.331	45.5392	206.5	4.81968	0.914414	312.187
1992	[2294] GILL J. B. (1992)	IZU-BONIN ARC / IZU-BONIN FORE-ARC / SITE 788///	140.004	30.9227	7.01	VOLCANIC ROCK	ANDESITE			PLIOCENE		60.32	0.793989	5.375	40.355	0.0448837	0.92	14.25	10.45				6.45	3.57	0.18	0.61	3.38	0.11	1.84		12.3	32		243				8.8					7.72	172	32	62	0.9	0.38	55
1992	[2342] PEARCE J. A. (1992)	IZU-BONIN ARC / IZU-BONIN FORE-ARC / SITE 782///	141.314	30.861	7.41	VOLCANIC ROCK	ANDESITE, THOLEIITIC			NEOGENE		56.1	0.735672	11.7019	36.9477	0.0440552	0.78	14.96		10.92			7.85	3.59	0.15	0.51	3.35	0.07	1.56			31		286	13		21	14	60	75			8.3	188.4	16.1	61	0.51		21
2020	[24037] GESHI N. (2020)	RYUKYU ARC / RYUKYU ARC / KYUSHU / AIRA//	130.723	31.6164	29.8	VOLCANIC ROCK	ANDESITE, ORTHOPYROXENE-CLINOPYROXENE			QUARTERNARY		65.299	0.952173	8.75431	36.3382	0.345979	0.614	15.208	4.632				4.195	1.335	0.117	2.29	3.566	0.139				21.096		81.167	1.619		55.769	0	0	65.555			78.44	226.719	25.898	140.652	0		351.149
2020	[24037] GESHI N. (2020)	RYUKYU ARC / RYUKYU ARC / KYUSHU / AIRA//	130.723	31.6164	29.8	VOLCANIC ROCK	ANDESITE, ORTHOPYROXENE-CLINOPYROXENE			QUARTERNARY		64.682	0.945755	8.79058	36.9487	0.326779	0.62	15.419	4.772				4.434	1.412	0.123	2.21	3.556	0.132				18.06		79.75	0.187		47.778	0	0	67.506			77.008	235.658	26.808	136.663	0		347.009
2020	[24037] GESHI N. (2020)	RYUKYU ARC / RYUKYU ARC / KYUSHU / AIRA//	130.723	31.6164	29.8	VOLCANIC ROCK	ANDESITE, ORTHOPYROXENE-CLINOPYROXENE			QUARTERNARY		63.761	0.957617	9.54191	39.6725	0.290305	0.62	15.765	5.192				4.65	1.724	0.123	2.116	3.476	0.132				17.379		107.769	10.212		48.735	0	0	67.957			68.681	236.582	24.794	137.759	0		339.406
2020	[24037] GESHI N. (2020)	RYUKYU ARC / RYUKYU ARC / KYUSHU / AIRA//	130.723	31.6164	29.8	VOLCANIC ROCK	ANDESITE, ORTHOPYROXENE-CLINOPYROXENE			QUARTERNARY		64.547	0.954976	8.86703	38.6764	0.343103	0.621	15.589	4.996				4.479	1.591	0.124	2.196	3.528	0.122				19.821		103.467	11.038		33.212	0	0	66.999			77.311	225.329	25.412	142.205	0		337.382
2020	[24037] GESHI N. (2020)	RYUKYU ARC / RYUKYU ARC / KYUSHU / AIRA//	130.723	31.6164	29.8	VOLCANIC ROCK	ANDESITE, ORTHOPYROXENE-CLINOPYROXENE			QUARTERNARY		64.565	0.953577	8.80633	38.7828	0.333011	0.608	15.753	4.908				4.549	1.57	0.122	2.226	3.55	0.147				17.02		90.722	5.985		50.442	0	0	66.941			77.239	231.941	26.338	138.949	0		348.873
2020	[24037] GESHI N. (2020)	RYUKYU ARC / RYUKYU ARC / KYUSHU / AIRA//	130.723	31.6164	29.8	VOLCANIC ROCK	ANDESITE, ORTHOPYROXENE-CLINOPYROXENE			QUARTERNARY		65.939	0.957838	8.13228	36.355	0.374419	0.586	15.322	4.431				4.133	1.278	0.114	2.353	3.608	0.124				18.54		83.427	0.599		24.512	0	0	64.922			82.982	221.629	27.253	146.515	0		370.441
2020	[24037] GESHI N. (2020)	RYUKYU ARC / RYUKYU ARC / KYUSHU / AIRA//	130.723	31.6164	29.8	VOLCANIC ROCK	ANDESITE, ORTHOPYROXENE-CLINOPYROXENE			QUARTERNARY		64.985	0.964109	9.04237	36.5944	0.326952	0.606	15.49	4.684				4.249	1.365	0.116	2.299	3.558	0.13				18.996		88.688	7.682		31.499	0	0	66.861			73.34	224.314	24.807	139.406	0		368.138
2020	[24037] GESHI N. (2020)	RYUKYU ARC / RYUKYU ARC / KYUSHU / AIRA//	130.723	31.6164	29.8	VOLCANIC ROCK	ANDESITE, ORTHOPYROXENE-CLINOPYROXENE			QUARTERNARY		64.911	0.952491	8.43435	36.9538	0.335984	0.605	15.583	4.7				4.419	1.391	0.117	2.268	3.569	0.132				17.201		81.725	0.999		72.909	0	0	64.638			77.788	231.523	27.45	137.948	0		372.399
1998	[3656] ARAKAWA Y.(1998) [GeoReM [193] ]	RYUKYU ARC / RYUKYU ARC / KYUSHU / SAKURAJIMA / BUNMEI LAVA/	130.75	31.75	29.8	VOLCANIC ROCK	ANDESITE		235	QUATERNARY		65.47	0.951008	7.76471	31.1291	0.269697	0.8	15.73	5.74				4.3	1.31	0.14	2.04	3.96	0.19						95	150			88	6	83			71.2	264	34	145	7.3		370
1992	[2342] PEARCE J. A. (1992)	IZU-BONIN ARC / IZU-BONIN FORE-ARC / SITE 786///	141.226	31.8742	7.19	VOLCANIC ROCK	DACITE			NEOGENE		64.8	0.913066	21.9802	43.834	0.040991	0.28	14.72		5.39			5	2.36	0.04	0.69	3.82	0.08	1.23			20.4		152	51		13.9	26	34	48			9.1	222	10.1	62	1.03		62
2014	[18770] GATZOUBAROS M. (2014)	ANDEAN ARC / SOUTHERN ANDEAN VOLCANIC ZONE / ARGENTINA / PACHON FORMATION//	-70.5064	-31.4775	52.85	VOLCANIC ROCK	ANDESITE			MIOCENE		64.14	0.944315	7.06155	35.6182	0.197563	0.92	15	4.26				3.8	1.19	0.13	1.97	4.16	0.24	4.51		11.97	4949	49.8	16.53		5.46	13.84	12.31	62.75	15.47	6.67	42.16	213.4	30.22	219.4	9.85	5.8	330.9	22.28
2014	[18770] GATZOUBAROS M. (2014)	ANDEAN ARC / SOUTHERN ANDEAN VOLCANIC ZONE / ARGENTINA / PACHON FORMATION//	-70.4504	-31.4827	52.85	VOLCANIC ROCK	ANDESITE			MIOCENE		58.4	0.833555	24.0702	29.7083	0.137888	1	16.91	5.67				6.08	1.21	0.14	2.42	4.02	0.46	3.47		11.82	5793	75.2	3.08		9.68	3.1	8.72	67.65	17.07	11.02	67.11	486.7	20.22	219.1	10.59	1.6	562.4	32.97
2014	[18770] GATZOUBAROS M. (2014)	ANDEAN ARC / SOUTHERN ANDEAN VOLCANIC ZONE / ARGENTINA / PACHON FORMATION//	-70.4507	-31.483	52.85	VOLCANIC ROCK	ANDESITE			MIOCENE		62.39	0.978278	17.1448	38.5375	0.171971	0.72	16.16	4.58				3.62	1.45	0.11	2.6	4.33	0.29	3.55		9.19	4256	27.5	2.69		7.16	4.88	4.14	60.12	16.62	12.18	65.16	378.9	22.1	220.1	10.53	2.21	615.3	30.11
2014	[18770] GATZOUBAROS M. (2014)	ANDEAN ARC / SOUTHERN ANDEAN VOLCANIC ZONE / ARGENTINA / PACHON FORMATION//	-70.4465	-31.4797	52.85	VOLCANIC ROCK	ANDESITE			MIOCENE		59.75	0.933845	22.4287	38.8752	0.158655	1.02	17.17	6.01				4.3	1.93	0.1	2.94	4.49	0.46	1.52		10.31	5696	74.3	18.58		9.25	18.77	6.14	65.38	17.82	3.27	77.36	487.6	21.74	220.2	10.45	1.18	591.4	33.4
2014	[18770] GATZOUBAROS M. (2014)	ANDEAN ARC / SOUTHERN ANDEAN VOLCANIC ZONE / ARGENTINA / PACHON FORMATION//	-70.4485	-31.4813	52.85	VOLCANIC ROCK	ANDESITE			MIOCENE		60.75	0.879807	20.1713	18.8849	0.18132	0.89	16.12	6.38				5.17	0.75	0.11	3	3.45	0.28	2.78		12.7	4844	75	14.18		11.84	10.97	29.47	56.39	15.6	17.24	66.2	365.1	18.1	156.1	7.58	4.65	483.8	22.24
2011	[15544] MAYDAGAN L. (2011)	ANDEAN ARC / SOUTHERN ANDEAN VOLCANIC ZONE / ARGENTINA///	-70.47	-31.48	52.85	VOLCANIC ROCK	ANDESITE			MIOCENE		57.25	0.954385	8.82	43.4972	0.146032	0.9	17.11	6.02				3.63	2.34	0.15	1.21	6.09	0.2	4.9		14		65			14.8	10.6	4.1	89	16	9.3	32.2	220.5	25	262	11.8	1.5	265	21.5
2011	[15544] MAYDAGAN L. (2011)	ANDEAN ARC / SOUTHERN ANDEAN VOLCANIC ZONE / ARGENTINA///	-70.47	-31.48	52.85	VOLCANIC ROCK	DACITE			MIOCENE		65.15	0.886316	15.8995	29.8521	0.292361	0.6	14.37	3.63				4.03	0.78	0.12	2.86	3.52	0.21	4.6		7		33			5	1	10.9	61	17.6	10	101.8	348.2	21.9	249.7	11	8.8	525	30.2
2021	[24609] SUDA Y. (2021)	HONSHU ARC / SOUTHWESTERN HONSHU ARC / GOTO ISLANDS/FUKUE-JIMA//	129.153	32.9859	28.82	PLUTONIC ROCK	DIORITE			MIOCENE		58.72	0.858949	10.3077	42.6059	0.175373	0.98	16.73	7.23				7.27	2.71	0.14	1.71	2.68	0.15				26.1		136	20		18.7	3	6	72	17.4		47	268	26	184	11.3		465
2021	[24609] SUDA Y. (2021)	HONSHU ARC / SOUTHWESTERN HONSHU ARC / GOTO ISLANDS/FUKUE-JIMA//	129.153	32.9867	28.82	PLUTONIC ROCK	DIORITE			MIOCENE		58.82	0.862308	8.5625	42.6172	0.120438	0.93	16.87	7.44				7.76	2.79	0.12	1.21	2.52	0.14				27.3		108	28.2		33.4	5	8	75	16.9		33	274	32	169	11.3		338
2021	[24609] SUDA Y. (2021)	HONSHU ARC / SOUTHWESTERN HONSHU ARC / GOTO ISLANDS/FUKUE-JIMA//	129.15	32.9881	28.82	PLUTONIC ROCK	DIORITE			MIOCENE		59.76	0.851846	8.71875	42.1997	0.121864	0.99	16.78	7.08				8.07	2.61	0.13	1.3	2.2	0.15				27.6		111	15.6		22	2	5	88	17.2		34	279	32	178	12		441
2021	[24609] SUDA Y. (2021)	HONSHU ARC / SOUTHWESTERN HONSHU ARC / GOTO ISLANDS/FUKUE-JIMA//	129.15	32.9876	28.82	PLUTONIC ROCK	DIORITE			MIOCENE		58.96	0.871905	8.78125	41.3478	0.16726	0.95	16.48	7.22				7.09	2.57	0.13	1.86	2.43	0.14				22.8		105	23.6		21.8	3	24	101	16.6		47	281	32	185	11.9		514
2021	[24609] SUDA Y. (2021)	HONSHU ARC / SOUTHWESTERN HONSHU ARC / GOTO ISLANDS/FUKUE-JIMA//	129.152	32.9928	28.82	PLUTONIC ROCK	DIORITE			MIOCENE		60.15	0.902642	8.8125	42.0806	0.106383	0.99	16.76	7.36				7.47	2.7	0.12	1.4	2.11	0.15				23.8		110	14.1		27	3	20	80	17		30	282	32	186	12.1		481
2021	[24609] SUDA Y. (2021)	HONSHU ARC / SOUTHWESTERN HONSHU ARC / GOTO ISLANDS/FUKUE-JIMA//	129.151	32.9919	28.82	PLUTONIC ROCK	DIORITE			MIOCENE		56.4	0.827267	7.82353	35.3441	0.0902256	1.15	15.69	8.84				6.87	2.44	0.17	1.56	2.91	0.23				28.9		131	0.1		25.7	2	2	42	17.9		24	266	34	159	7.5		498
2021	[24609] SUDA Y. (2021)	HONSHU ARC / SOUTHWESTERN HONSHU ARC / GOTO ISLANDS/FUKUE-JIMA//	129.15	32.9895	28.82	PLUTONIC ROCK	GRANITE			MIOCENE		62.76	0.916813	8.5	43.2452	0.317647	0.75	14.97	6.29				4.75	2.42	0.12	3.14	2.61	0.13				23.3		117	33.3		19.5	4	0	101	15.3		81	255	30	170	9.9		638
2021	[24609] SUDA Y. (2021)	HONSHU ARC / SOUTHWESTERN HONSHU ARC / GOTO ISLANDS/FUKUE-JIMA//	129.148	32.9903	28.82	PLUTONIC ROCK	GRANITE			MIOCENE		62.51	0.952233	6.625	43.8351	0.231132	0.71	15.22	6.42				5.5	2.53	0.13	1.82	2.44	0.13				21.7		121	33.5		20.6	6	0	94	15.9		49	212	32	170	9.4		519
2021	[24609] SUDA Y. (2021)	HONSHU ARC / SOUTHWESTERN HONSHU ARC / GOTO ISLANDS/FUKUE-JIMA//	129.149	32.9896	28.82	PLUTONIC ROCK	GRANITE			MIOCENE		61.53	0.999412	8.03333	42.263	0.294606	0.8	16.29	5.79				5.17	2.14	0.12	2.18	2.76	0.18				20.3		138	28.9		19.3	5	19	66	16.6		71	241	30	123	9.4		489
2021	[24609] SUDA Y. (2021)	HONSHU ARC / SOUTHWESTERN HONSHU ARC / GOTO ISLANDS/FUKUE-JIMA//	129.15	32.9931	28.82	PLUTONIC ROCK	GRANITE			MIOCENE		63.47	0.954907	8.37037	42.6045	0.159292	0.78	15.55	6.43				5.76	2.41	0.13	1.57	2.5	0.14				19.8		110	45.2		20.4	9	0	63	16.3		36	226	27	168	10.4		444
2001	[4869] KITA I. (2001)	RYUKYU ARC / RYUKYU BACK-ARC / KYUSHU / UNZEN//	130.197	32.689	25.8	VOLCANIC ROCK	ANDESITE			QUATERNARY		58.45	0.876508	9.93617	40.5489	0.110707	1	17.08	7.84				6.77	2.7	0.16	1.54	3.35	0.23	2.04														51.7	467	47	132	7.79		374
2001	[4869] KITA I. (2001)	RYUKYU ARC / RYUKYU BACK-ARC / KYUSHU / UNZEN//	130.183	32.6695	25.8	VOLCANIC ROCK	ANDESITE			QUATERNARY		56.5	0.865095	12.4103	43.9631	0.0907025	1.06	17.28	8.28				7.3	3.28	0.15	1.42	3.14	0.21	1.41														43.9	484	39	74.8	6.74		306
2020	[23689] SATO T. (2020)	IZU-BONIN ARC / IZU-BONIN REARARC / SITE U1437///	140	32	11.63	VOLCANIC ROCK	NOT GIVEN	15000000	16000000	MIOCENE		56.49	0.835088	8.59866	40.5943	0.0342279	1.07	18.2	8.26				7.47	2.85	0.22	0.87	4.42	0.19						316.4	17.5			11	25.8	98			8.8	257.1	29.9	84.1	0		123
2002	[15222] FEDOROV P. I. (2002)	CENTRAL ASIAN FOLDBELT - CENOZOIC/QUATERNARY / KOREAN PENINSULA - CENOZOIC/QUATERNARY / KOREAN PENINSULA / JEJU ISLAND	126	33.8	33.89	VOLCANIC ROCK	TRACHYANDESITE			PLIOCENE-QUATERNARY		57.6	0.914005	13.4931	28.7286	0.159105	1.24	17.62	8.5				3.88	1.73	0.13	3.39	5.2	0.42	0.02						12.5		5.8	12.6					77.5	487.1	36.1	518.8	79.5		1010.2
2002	[15222] FEDOROV P. I. (2002)	CENTRAL ASIAN FOLDBELT - CENOZOIC/QUATERNARY / KOREAN PENINSULA - CENOZOIC/QUATERNARY / KOREAN PENINSULA / JEJU ISLAND	126	33.8	33.89	VOLCANIC ROCK	TRACHYTE			PLIOCENE-QUATERNARY		62.18	0.974638	19.3218	31.8659	0.155009	0.6	17.83	3.43				2.68	0.81	0.18	3.98	5.54	0.19	0.38						3.7		7.9	2.7					60.5	390.3	20.2	287.6	93.1		996.6
1994	[6615] KAKUBUCHI S. (1994)	HONSHU ARC / SOUTHWESTERN HONSHU ARC / KYUSHU / KITA-MATSUURA BASALTS//	129.5	33.5	28.94	VOLCANIC ROCK	BASALT			MIOCENE		56.04	0.871914	15.575	38.9668	0.0417335	1.75	17.89			8.18		6.7	2.93	0.13	1.79	3.89	0.68						158	26			14		110			26	623	40	284	45		624
1994	[6615] KAKUBUCHI S. (1994)	HONSHU ARC / SOUTHWESTERN HONSHU ARC / KYUSHU / KITA-MATSUURA BASALTS//	129.5	33.5	28.94	VOLCANIC ROCK	BASALT			MIOCENE		67.21	0.982319	10.2692	40.1786	0.363296	0.45	16.38			3.45		2.91	1.3	0.09	3.42	4.67	0.12						58	48			19		70			97	267	26	228	22		677
2001	[4869] KITA I. (2001)	HONSHU ARC / SOUTHWESTERN HONSHU ARC / KYUSHU / KUJU/KUZYU VOLCANO GROUP/	131.258	33.1167	40.37	VOLCANIC ROCK	ANDESITE			QUATERNARY		61.54	0.847144	34.0667	44.6061	0.111546	0.72	16	6.37				5.86	2.59	0.13	2.15	3.59	0.18	0.93														57	511	15	82.3	7.56		510
2003	[6577] TATSUMI Y. (2003)	HONSHU ARC / SOUTHWESTERN HONSHU ARC / KYUSHU / OONO / DAISANGO-YAMA LAVA/	131.57	33.0304	40.37	VOLCANIC ROCK	ANDESITE			MIOCENE		60.79	0.906193	12.3043	32.2544	0.34629	1.22	16.94	5.99				5.76	1.44	0.12	2.96	3.05	0.26				15.8			29		18.6	9.3					98	283	23	232	12		479
2003	[6577] TATSUMI Y. (2003)	HONSHU ARC / SOUTHWESTERN HONSHU ARC / KYUSHU / OONO / DAISANGO-YAMA LAVA/	131.53	33.014	40.37	VOLCANIC ROCK	ANDESITE			MIOCENE		60.63	0.917852	12.4783	33.7213	0.344948	1.21	16.97	5.8				5.74	1.49	0.1	2.85	3.02	0.26				17.2			27		17.7	9.2					99	287	23	231	12		462
2003	[6577] TATSUMI Y. (2003)	HONSHU ARC / SOUTHWESTERN HONSHU ARC / KYUSHU / OONO / DAISANGO-YAMA LAVA/	131.397	33.0148	40.37	VOLCANIC ROCK	ANDESITE			MIOCENE		61.24	0.913948	12.3043	33.422	0.353357	1.23	17.21	5.76				5.76	1.46	0.1	2.98	3.12	0.26				16.8			26		17.9	9.1					100	283	23	232	12		467
2003	[6577] TATSUMI Y. (2003)	HONSHU ARC / SOUTHWESTERN HONSHU ARC / KYUSHU / OONO / DAISANGO-YAMA LAVA/	131.551	33.0025	40.37	VOLCANIC ROCK	ANDESITE			MIOCENE		59.45	0.910005	13.55	41.1539	0.295203	1.15	16.93	6.57				6.2	2.32	0.11	2.26	2.97	0.22				21.4			30		17.6	6.6					80	271	20	184	10		348
2021	[24796] SATO D. (2021)	HONSHU ARC / SOUTHWESTERN HONSHU ARC / YASHIRO-SHIMA ISLAND / JIKAMURO FORMATION//	132.326	33.8644	37.17	VOLCANIC ROCK	NOT GIVEN			MIOCENE		60.771	0.932163	20.2501	41.2209	0.342562	1.107	17.51	5.49				4.606	1.944	0.062	3.435	4.068	0.31	1.38132		12.7055	6488.28	92.6436	40.2092	524.478		18.3114	24.1627	58.585	26.5431		124.374	363.069	17.9292	232.482	15.1965	23.3993	564.319	24.953
2021	[24796] SATO D. (2021)	HONSHU ARC / SOUTHWESTERN HONSHU ARC / YASHIRO-SHIMA ISLAND / JIKAMURO FORMATION//	132.314	33.8669	37.17	VOLCANIC ROCK	NOT GIVEN			MIOCENE		57.35	0.882599	22.9574	40.8781	0.305054	1.404	17.833	6.061				5.881	2.116	0.123	3.524	3.464	0.314	0.258444		13.1689	8343.44	111.278	29.2833	994.898		16.4043	22.3526	120.78	26.6214		133.007	436.012	18.9922	244.8	14.2847	16.7455	505.937	23.757
2021	[24796] SATO D. (2021)	HONSHU ARC / SOUTHWESTERN HONSHU ARC / YASHIRO-SHIMA ISLAND / JIKAMURO FORMATION//	132.363	33.8619	37.17	VOLCANIC ROCK	NOT GIVEN			MIOCENE		59.527	0.956633	17.4053	37.3557	0.185818	0.77	18.022	6.576				6.561	1.98	0.101	1.913	2.942	0.19	2.63321		16.1304	4608.22	106.153	17.2824	823.284		6.04605	3.2146	89.1579	25.4009		60.1462	323.683	18.5968	126.637	6.55319	5.33726	545.098	15.2019
2021	[24796] SATO D. (2021)	HONSHU ARC / SOUTHWESTERN HONSHU ARC / YASHIRO-SHIMA ISLAND / JIKAMURO FORMATION//	132.366	33.8633	37.17	VOLCANIC ROCK	NOT GIVEN			MIOCENE		59.507	0.983822	16.1409	38.6121	0.200419	0.79	18.404	6.776				6.307	2.152	0.075	2.111	3.012	0.184	3.68698		13.5878	4759.92	101.116	15.5211	584.243		6.76276	41.6871	65.7648	25.2063		60.3887	301.312	18.6677	130.939	6.95471	13.5977	633.883	14.9163
2021	[24796] SATO D. (2021)	HONSHU ARC / SOUTHWESTERN HONSHU ARC / YASHIRO-SHIMA ISLAND///	132.491	33.9581	37.17	VOLCANIC ROCK	NOT GIVEN			MIOCENE		60.723	0.917244	25.6091	38.8795	0.233983	0.511	17.634	5.847				6.741	1.878	0.062	1.908	2.981	0.177	4.2923		12.7585	3049.06	59.1868	49.2221	503.264		16.8665	3.7102	88.7326	24.8935		70.4083	300.912	11.7502	123.788	6.65105	18.9906	454.527	13.724
2021	[24796] SATO D. (2021)	HONSHU ARC / SOUTHWESTERN HONSHU ARC / YASHIRO-SHIMA ISLAND///	132.342	33.9081	37.17	VOLCANIC ROCK	NOT GIVEN			MIOCENE		57.533	0.963404	17.2339	39.3512	0.180071	0.939	18.394	6.529				5.733	2.139	0.042	1.988	3.962	0.195	1.84		15.1182	5447.13	127.569	8.76801	317.904		8.00493	12.9531	59.8569	21.7554		61.1308	339.482	19.6984	132.484	6.21525	2.70217	349.231	12.1682
2020	[24360] JACQUES G. (2020)	ANDEAN ARC / SOUTHERN ANDEAN VOLCANIC ZONE / CHILE///	-70.4635	-33.5822	39.95	PLUTONIC ROCK	GRANODIORITE			MIOCENE		66.509	0.92608	4.81545	26.7211	0.0853654	0.835514	14.9789	5.95933				3.35212	1.09724	0.120797	2.27502	4.63056	0.241595	0.93	5.67254	10.0859		43.2723	7.6245		7.91231	1.25696	27.9135	77.5171	17.8053		14.744	172.716	35.8671	243	5.7238	1.11173	459.345	15.84
2020	[24360] JACQUES G. (2020)	ANDEAN ARC / SOUTHERN ANDEAN VOLCANIC ZONE / CHILE///	-70.4635	-33.5822	39.95	PLUTONIC ROCK	DIORITE			MIOCENE		60.0361	0.83729	11.2822	38.157	0.043766	0.941506	16.6567	7.8125				6.61058	2.43389	0.140224	0.851362	4.22676	0.290465	0.87	5.62447	22.9086		129.117	22.6679		16.67	5.69434	79.0958	81.2396	19.4555		15.0615	344.136	30.5026	148	3.67727	0.532597	302.917	13.7367
2021	[25215] YI EUN JI (2021)	HONSHU ARC / SOUTHWESTERN HONSHU ARC / TSUSHIMA ISLANDS///	129.207	34.1517	30.16	PLUTONIC ROCK	GRANODIORITE			MIOCENE		67.64	0.993701	4.875	31.021	0.299145	0.646	15.04	4.58				3.21	1.04	0.042	3.12	3.6	0.16	0.69				84	130		7	0	0	0	16		70	234	48	245	6	2.2	755	20.6
2021	[25215] YI EUN JI (2021)	HONSHU ARC / SOUTHWESTERN HONSHU ARC / TSUSHIMA ISLANDS///	129.207	34.1517	30.16	PLUTONIC ROCK	NOT GIVEN			MIOCENE		61.66	0.905923	9.75	36.7046	0.324786	0.961	15.46	8.06				4.61	2.36	0.085	2.43	3.68	0.22	1.02				159	160		12	0	0	34.4	18		76	234	24	171	8	3	475	19.7
2005	[7408] KAWABATA H.(2005) [GeoReM [1143] ]	HONSHU ARC / SOUTHWESTERN HONSHU ARC / SHIKOKU/SIKOKU / SHIOYAMA ANDESITE/	133.68	34.2	35.84	VOLCANIC ROCK	ANDESITE			MIOCENE		61.62	0.976505	14.25	34.0546	0.231579	0.59	18.28		5.35			5.96	1.55	0.1	1.63	3.72	0.15	0.72				84	9			0					66	285	20	135	6		339
2005	[7408] KAWABATA H.(2005) [GeoReM [1143] ]	HONSHU ARC / SOUTHWESTERN HONSHU ARC / SHIKOKU/SIKOKU / SHIOYAMA ANDESITE/	133.68	34.2	35.84	VOLCANIC ROCK	ANDESITE			MIOCENE		60.55	0.976639	13.55	39.6386	0.214022	0.65	18.11		6.08			6.01	2.24	0.1	1.55	3.61	0.15	0.76				108	6			0					58	271	20	125	6		308
2005	[7408] KAWABATA H.(2005) [GeoReM [1143] ]	HONSHU ARC / SOUTHWESTERN HONSHU ARC / SHIKOKU/SIKOKU / SHIOYAMA ANDESITE/	133.68	34.2	35.84	VOLCANIC ROCK	ANDESITE			MIOCENE		63.46	0.986991	18.8125	39.6618	0.245847	0.54	17.53		4.42			5.04	1.63	0.06	1.94	3.95	0.14	1.04				65	7			0					74	301	16	115	7		353
2005	[7408] KAWABATA H.(2005) [GeoReM [1143] ]	HONSHU ARC / SOUTHWESTERN HONSHU ARC / SHIKOKU/SIKOKU / SOU ANDESITE/	133.68	34.2	35.84	VOLCANIC ROCK	ANDESITE			MIOCENE		60.98	0.977685	16.3125	39.2734	0.287356	0.61	18.41		5.65			6.11	2.05	0.12	1.48	3.72	0.15	0.94				66	75			30					75	261	16	128	7		347
2021	[25198] GAO PIN (2021)	HONSHU ARC / SOUTHWESTERN HONSHU ARC / SHIKOKU/SIKOKU//	133.91	34.3338	35.84	VOLCANIC ROCK	ANDESITE			MIOCENE		61.4	0.98515	13.0833	37.7005	0.301274	0.67	18.5	5.39	3.88	4.86	1.37	5.1	1.65	0.07	2.43	4.18	0.2	0.34	32	9.66		47.2	45.4		9.8	23.2	18.5	68.3	20.7		94.6	314	24	178	10.6	7.14	418	30.8
2017	[22900] ARAKAWA Y. (2017)	IZU-BONIN ARC / BONIN ARC / NIIJIMA / NIIJIMA//	139.4	34.4	20.58	VOLCANIC ROCK	ANDESITE			QUATERNARY		66.49	0.949836	9.41581	35.1868	0.0364964	0.58	16.46	4.56				5.14	1.25	0.18	0.75	4.36	0.2	0.51		17		56	0		4	0	0	90	16	0	10	274	29.1	103	2.7	0.6	208	6.74
2022	[26303] ARAKAWA Y. (2022)	IZU-BONIN ARC / IZU ARC / HONSHU / ANANOYAMA//	139.056	34.9123	20.58	VOLCANIC ROCK	NOT GIVEN			HOLOCENE		60.67	0.914916	17.7512	36.3329	0.0619946	0.794	16.75			7.34		5.94	2.35	0.148	1.45	3.61	0.09	0.44		22		151	30		12	20	0	80			23	371	20.9	84	1.8	0.9	287	8.82
1997	[2336] TOGASHI S. (1997)	IZU-BONIN ARC / IZU ARC / IZU-OSHIMA / OSHIMA//	139.42	34.75	20.58	VOLCANIC ROCK	ANDESITE			PLEISTOCENE		57.32	0.71541	4.98559	34.2364	0.0526012	1.21	13.94			12.36		8.18	3.61	0.2	0.66	2.37	0.13					413	17			11	222	118			9.1	173	34.7	74.7			320
1997	[2336] TOGASHI S. (1997)	IZU-BONIN ARC / IZU ARC / IZU-OSHIMA / OSHIMA//	139.42	34.75	20.58	VOLCANIC ROCK	ANDESITE			PLEISTOCENE		61.05	0.848547	4.82051	23.7646	0.0478723	1.21	14.41			11.15		6.51	1.95	0.24	0.59	2.74	0.15					111	5			1	90	136			9	188	39	65			317
2019	[22861] ARAKAWA Y.(2019) [GeoReM [11940] ]	IZU-BONIN ARC / IZU ARC / NIISHIMA /NII-ZIMA/NIIJIMA / SETOYAMA	139.3	34.4	20.58	VOLCANIC ROCK	RHYOLITE			QUATERNARY		62.4	0.904723	10.2979	38.877	0.053719	0.685	16.4	6.57				5.83	2.11	0.178	0.86	4.01	0.09	0.45		21		118						70			13	242	23.5	86	1.8	0.8	160	5.11
2005	[7519] DUGGEN S. (2005)	APENNINIC-MAGHREBIDES CHAIN / MAGHREBIDES / MOROCCO / OUJDA VOLCANIC FIELD//	-2.0883	34.9458	30.1	VOLCANIC ROCK	TRACHYANDESITE			NEOGENE		59.36	0.911206	32.6208	25.2073	0.189341	0.56	16.85			5.18291		5.63	0.98	0.07	3.98	2.4	0.36		9.96			75	18		12			58	21		135	713	21.8572	301	23.4286	1.94671	1459	68.3638
2005	[7519] DUGGEN S. (2005)	APENNINIC-MAGHREBIDES CHAIN / MAGHREBIDES / MOROCCO / GUILLIZ VOLCANIC FIELD//	-3.3217	34.4383	29.67	VOLCANIC ROCK	TRACHYANDESITE			NEOGENE		56.9	0.776652	9.46015	32.945	0.355978	1.19	16.83			5.6958		4.48	1.57	0.15	3.8	5.72126	0.46					84			14	7		137	17		131	368	38.9	379	74.9217	3.18941	1227	71.7899
2011	[15579] STERN C. R. (2011)	ANDEAN ARC / SOUTHERN ANDEAN VOLCANIC ZONE / CHILE / SEWELL TONALITE//	-70.35	-34.08	42.96	PLUTONIC ROCK	TONALITE	7050000	7050000	MIOCENE		63.7	0.972587	63.5455	39.4132	0.137339	0.39	17.1		1.9	4.11	2.4	3.9	1.5	0.08	2.2	4.93	0.21	1.8		6			24			0	480				96	699	11	94		6.1	528	14.4
2011	[15579] STERN C. R. (2011)	ANDEAN ARC / SOUTHERN ANDEAN VOLCANIC ZONE / CHILE / SEWELL TONALITE//	-70.35	-34.08	42.96	PLUTONIC ROCK	TONALITE	7050000	7050000	MIOCENE		66.35	0.99925	146.25	41.7271	0.133333	0.38	15.82		0.91	2.539	1.72	2.86	1.02	0.04	2.71	4.68	0.14	2.85		4			0			0	880				78	585	4	91		4.8	605	14.2
2011	[15579] STERN C. R. (2011)	ANDEAN ARC / SOUTHERN ANDEAN VOLCANIC ZONE / CHILE / TENIENTE VOLCANIC COMPLEX//	-70.35	-34.08	42.96	VOLCANIC ROCK	BASALT	8900000	8900000	MIOCENE		59.03	0.923421	39.2143	43.2218	0.100182	0.78	17.78	6.27		0		5.93	2.41	0.08	1.84	3.94	0.22	1.63		15			21			29	259				55	549	14	147		2.3	443	16
2002	[7657] COULON C. (2002)	APENNINIC-MAGHREBIDES CHAIN / MAGHREBIDES / ALGERIA///	-1.2	35.6	20.13	VOLCANIC ROCK	NOT GIVEN			MIOCENE		67.6	0.852354	24.7059	38.1377	0.359524	0.29	15.15	2.57				2.89	0.8	0.02	6.43	3.38	0.13	1.93		3.5		34	4		3	5					151	420	17	78	9.5		960	43
2002	[7657] COULON C. (2002)	APENNINIC-MAGHREBIDES CHAIN / MAGHREBIDES / ALGERIA///	-1.2	35.6	20.13	VOLCANIC ROCK	NOT GIVEN			MIOCENE		62	0.927703	27.1429	40.2437	0.25614	0.49	17	3.97				5	1.35	0.08	3.06	3.6	0.2	3.12		6.2		76	18		9	7					146	570	21	220	10.5		1010	53
2002	[7657] COULON C. (2002)	APENNINIC-MAGHREBIDES CHAIN / MAGHREBIDES / ALGERIA///	-1.1	35.5	20.13	VOLCANIC ROCK	NOT GIVEN			MIOCENE		67.7	0.88227	20.2174	43.698	0.227957	0.64	15.1	2.96				4.44	1.16	0.03	3.43	3.24	0.23	1.57		7.1		97	26		6.9	8.6					106	465	23	185	11.1		955	46
1995	[6450] MORRIS P. A. (1995)	HONSHU ARC / SOUTHWESTERN HONSHU ARC / HONSHU / SAMBE//	132.63	35.15	34.32	VOLCANIC ROCK	DACITE			QUATERNARY		65.29	0.967301	110.125	44.7158	0.0533485	0.33	16.53		3.57			4.57	1.62	0.09	1.85	4.12	0.14						13			9					47	881	8	102	11		493
2013	[17711] FEINEMAN M.(2013) [GeoReM [7710] ]	HONSHU ARC / SOUTHWESTERN HONSHU ARC / HONSHU / DAISEN//	133.507	35.355	31.76	VOLCANIC ROCK	ANDESITE			QUATERNARY		63.19	0.944461	94.579	44.1749	0.037439	0.41	17.97	4.48				5.96	1.79	0.09	1.26	4.15	0.19	0.42	8.72												30.7	820	8.67	68.5	3.7	0.761	406	18.3
2014	[18473] KIMURA J.-I.(2014) [GeoReM [8127] ]	HONSHU ARC / SOUTHWESTERN HONSHU ARC / HONSHU / DAISEN//	133.57	35.38	31.76	VOLCANIC ROCK	ADAKITE			QUATERNARY		61.8788	0.966358	93.6355	44.7047	0.028701	0.452637	18.7056			4.90112		6.12816	2.22304	0.0732649	1.29167	4.14398	0.201729									21.5595					26.49	922.965	9.857	95.43	4.302		404.645	26.4
2014	[18473] KIMURA J.-I.(2014) [GeoReM [8127] ]	HONSHU ARC / SOUTHWESTERN HONSHU ARC / HONSHU / DAISEN//	133.57	35.38	31.76	VOLCANIC ROCK	ADAKITE			QUATERNARY		63.4953	0.946297	108.615	41.3878	0.0314419	0.405483	18.2508			4.30695		5.91564	1.70624	0.0863157	1.34392	4.30174	0.187687									10.6032					26.33	837.418	7.71	106	6.482		425.561	21.39
1994	[7370] MIYAKE Y. (1994)	HONSHU ARC / SOUTHWESTERN HONSHU ARC / HONSHU///	133.17	35.58	31.76	VOLCANIC ROCK	ANDESITE			MIOCENE		58.23	0.840629	16.4815	38.8393	0.0247191	1.44	15.42			7.41		7.26	2.64	0.15	0.74	2.64	0.25						0		18	12		129			11	445	27	81	2	0	293	8.5
1994	[7370] MIYAKE Y. (1994)	HONSHU ARC / SOUTHWESTERN HONSHU ARC / HONSHU///	133.17	35.58	31.76	VOLCANIC ROCK	ANDESITE			MIOCENE		60.9	0.943273	22.125	39.9725	0.0324859	1.21	14.76			6.21		4.07	2.32	0.1	1.48	4.04	0.42						0		13	0		100			23	708	32	144	5	0	415	14.6
1994	[7370] MIYAKE Y. (1994)	HONSHU ARC / SOUTHWESTERN HONSHU ARC / HONSHU///	133.17	35.58	31.76	VOLCANIC ROCK	ANDESITE			MIOCENE		59.2	0.793151	8.66667	29.2086	0.158974	1.31	14.36			8.64		6.09	2	0.19	0.95	3.65	0.4						0		11	0		86			62	390	45	291	19	10.9	277	27.4
1994	[7370] MIYAKE Y. (1994)	HONSHU ARC / SOUTHWESTERN HONSHU ARC / HONSHU///	133.17	35.58	31.76	VOLCANIC ROCK	DACITE			MIOCENE		64.19	0.878075	7.19149	32.8975	0.180473	1.24	15.58			5.09		4.35	1.4	0.11	1.73	4.84	0.41						0		10	0		97			61	338	47	234	15	0	377	26.2
1994	[7370] MIYAKE Y. (1994)	HONSHU ARC / SOUTHWESTERN HONSHU ARC / HONSHU///	133.17	35.58	31.76	VOLCANIC ROCK	DACITE			MIOCENE		66.43	0.906644	5.3	13.1716	0.339623	0.72	14.51			6.11		3.44	0.52	0.13	2.29	4.42	0.18						0		5	3		73			90	265	50	298	19	0	412	28.8
1994	[7370] MIYAKE Y. (1994)	HONSHU ARC / SOUTHWESTERN HONSHU ARC / HONSHU///	133.17	35.58	31.76	VOLCANIC ROCK	ANDESITE			MIOCENE		57.97	0.776275	10.8788	36.4802	0.125348	1.25	15.52			6.89		6.37	2.22	0.23	1.16	4.35	0.33						0		12	2		36			45	359	33	174	11	0	210	18.4
1994	[7370] MIYAKE Y. (1994)	HONSHU ARC / SOUTHWESTERN HONSHU ARC / HONSHU///	133.17	35.58	31.76	VOLCANIC ROCK	ANDESITE, BASALTIC			MIOCENE		56.32	0.799275	13.4839	39.6036	0.11244	1.43	16.23			6.85		7.15	2.52	0.18	1.75	3.29	0.37						19		16	9		428			47	418	31	215	13	0	419	17.6
1994	[7370] MIYAKE Y. (1994)	HONSHU ARC / SOUTHWESTERN HONSHU ARC / HONSHU///	133.17	35.58	31.76	VOLCANIC ROCK	ANDESITE, BASALTIC			MIOCENE		56.76	0.823023	10.359	38.3088	0.215347	1.37	16.33			6.2		5.85	2.16	0.17	1.62	4.53	0.39						0		12	6		86			87	404	39	235	15	2.3	440	25.9
1994	[7370] MIYAKE Y. (1994)	HONSHU ARC / SOUTHWESTERN HONSHU ARC / HONSHU///	133.17	35.58	31.76	VOLCANIC ROCK	ANDESITE			MIOCENE		58.86	0.814442	8.11429	41.7956	0.260563	1.44	16.04			6.28		5.1	2.53	0.11	2.44	4.73	0.35						27		15	9		63			74	284	35	304	21	1.1	350	28.3
1994	[7370] MIYAKE Y. (1994)	HONSHU ARC / SOUTHWESTERN HONSHU ARC / HONSHU///	133.17	35.58	31.76	VOLCANIC ROCK	ANDESITE			MIOCENE		59.82	0.848586	10	42.6495	0.228205	1.4	16.41			6.04		6.01	2.52	0.16	1.95	3.83	0.42						0		16	4		83			89	390	39	224	17	2	267	25.2
1995	[3574] KANEKO T. (1995)	HONSHU ARC / NORTHEASTERN HONSHU ARC / HONSHU / TAKARA//	136.5	35.5	35.04	VOLCANIC ROCK	DACITE, AUGITE-HYPERSTHENE-BIOTITE-HORNBLENDE			QUATERNARY		67.33	0.965908	15.5417	36.7361	0.300268	0.58	15.04			3.53		3.36	1.15	0.1	3.24	3.62	0.22			10		45				2.7	6	55	18		112	373	24	164	11.2		517
2003	[9124] GESHI N. (2003)	HONSHU ARC / CENTRAL HONSHU ARC / HONSHU / KAMASAWA BRECCIATED INTRUSIONS//	137.5	35.5	37.14	PLUTONIC ROCK	NOT GIVEN			MIOCENE		57.1	0.783305	13.3714	31.0585	0.0619658	1.7	15.7			9.1		5.7	2.3	0.2	1.8	4.7	0.7											99			29	468	35	255	13
1995	[3574] KANEKO T. (1995)	HONSHU ARC / CENTRAL HONSHU ARC / HONSHU / ONTAKE/KISO-ON-TAKE/	137.48	35.89	37.14	VOLCANIC ROCK	ANDESITE, AUGITE			QUATERNARY		57.54	0.933368	16.9744	33.0377	0.0770393	1.12	19.58			6.25		7.05	1.73	0.12	1.87	3.73	0.43			17		119	2			5.8	14	97	22		51	662	39	180	9.3		446
2000	[4840] UJIKE O. (2000)	HONSHU ARC / CENTRAL HONSHU ARC / HONSHU / ONTAKE/KISO-ON-TAKE/	137.48	35.89	37.14	VOLCANIC ROCK	ANDESITE, ORTHOPYROXENE-CLINOPYROXENE			QUATERNARY		59.05	0.852381	21.0769	43.0301	0.120438	1.1	16.69	7.84				6.63	2.99	0.14	2.09	3.2	0.28									7					66	548	26	170	9
2003	[9124] GESHI N. (2003)	HONSHU ARC / CENTRAL HONSHU ARC / HONSHU / OTOGE CONE SHEETS//	137.5	35.5	37.14	VOLCANIC ROCK	NOT GIVEN			MIOCENE		57.3	0.759994	15.4615	37.7974	0.0970149	1.9	16.2			8.8		6.4	3	0.2	1.8	4.7	0.3											84			39	402	26	241	10
2003	[9124] GESHI N. (2003)	HONSHU ARC / CENTRAL HONSHU ARC / HONSHU / OTOGE CONE SHEETS//	137.5	35.5	37.14	VOLCANIC ROCK	NOT GIVEN			MIOCENE		62.5	0.879781	10.0909	18.8635	0.192192	0.9	16			6.9		3.9	0.9	0.2	2.5	5.1	0.3											90			64	333	33	328	12
2003	[9124] GESHI N. (2003)	HONSHU ARC / CENTRAL HONSHU ARC / HONSHU / OTOGE CONE SHEETS//	137.5	35.5	37.14	VOLCANIC ROCK	NOT GIVEN			MIOCENE		61.4	0.845589	4.93617	27.0273	0.262931	1.4	15.1			7.7		3.6	1.6	0.2	2.7	5.1	0.3											103			61	232	47	437	15
2003	[9124] GESHI N. (2003)	HONSHU ARC / CENTRAL HONSHU ARC / HONSHU / OTOGE PYROCLASTIC ROCKS//	137.5	35.5	37.14	VOLCANIC ROCK	NOT GIVEN			MIOCENE		59.4	0.878367	15.0667	30.2739	0.123894	1.3	16.4			7.8		5.4	1.9	0.2	2.1	4	0.5											86			56	452	30	239	9
2003	[9124] GESHI N. (2003)	HONSHU ARC / CENTRAL HONSHU ARC / HONSHU / OTOGE PYROCLASTIC ROCKS//	137.5	35.5	37.14	VOLCANIC ROCK	NOT GIVEN			MIOCENE		59.1	0.936636	14.3548	28.7328	0.0988764	1.4	16.6			8.4		5	1.9	0.1	2.2	3.8	0.6											91			44	445	31	234	10
2003	[9124] GESHI N. (2003)	HONSHU ARC / CENTRAL HONSHU ARC / HONSHU / OTOGE PYROCLASTIC ROCKS//	137.5	35.5	37.14	VOLCANIC ROCK	NOT GIVEN			MIOCENE		56.1	0.774359	22.2759	32.7106	0.0433437	1.5	16.6			8.8		7.1	2.4	0.2	1.8	4	0.6											100			28	646	29	240	10
2003	[9124] GESHI N. (2003)	HONSHU ARC / CENTRAL HONSHU ARC / HONSHU / OTOGE STOCKS//	137.5	35.5	37.14	VOLCANIC ROCK	NOT GIVEN			MIOCENE		65.9	0.981043	15.1	36.722	0.165563	0.6	16.3			4.3		3.4	1.4	0.1	2.8	4.5	0.2											78			50	302	20	112	6
2003	[9124] GESHI N. (2003)	HONSHU ARC / CENTRAL HONSHU ARC / HONSHU / SHITARA CENTRAL DIKE SWARM//	137.5	35.5	37.14	VOLCANIC ROCK	NOT GIVEN			MIOCENE		57.4	0.778939	9.7619	23.2549	0.268293	1.7	15.1			10		5.1	1.7	0.3	2.2	4.7	0.7											117			110	410	42	303	12
2003	[9124] GESHI N. (2003)	HONSHU ARC / CENTRAL HONSHU ARC / HONSHU / SHITARA CENTRAL DIKE SWARM//	137.5	35.5	37.14	VOLCANIC ROCK	NOT GIVEN			MIOCENE		59.2	0.856161	13.0263	13.8242	0.141414	1.1	15.5			10		4.4	0.9	0.2	2.8	4.3	0.4											123			70	495	38	297	13
1996	[2319] KANEKO T. (1996)	HONSHU ARC / CENTRAL HONSHU ARC / HONSHU / YATSUGATAKE//	138.37	35.97	28.04	VOLCANIC ROCK	DACITE, ORTHOPYROXENE-CLINOPYROXENE			QUATERNARY		65.02	0.991896	23.8	42.3192	0.121849	0.71	16.29			3.96		4	1.63	0.09	2.39	3.99	0.19			11		98	4			3	23	60	20		58	476	20	152	7		520
1988	[2315] TIBA T. (1988)	IZU-BONIN ARC / IZU ARC / HONSHU / JAISHI//	138.5	35.5	28.04	VOLCANIC ROCK	ANDESITE, OLIVINE-HYPERSTHENE-AUGITE			QUATERNARY		57.39	0.970653	8.48718	43.1062	0.0755287	0.77	18.08		3.73	7.387	4.03	6.72	3.14	0.16	1.24	3.08	0.17			21		158	46			17	29	49	14		25	331	39	94	5		199
1988	[2315] TIBA T. (1988)	IZU-BONIN ARC / IZU ARC / HONSHU / JAISHI//	138.5	35.5	28.04	VOLCANIC ROCK	ANDESITE, OLIVINE-HYPERSTHENE-AUGITE			QUATERNARY		56.03	0.845694	11.04	43.3764	0.0905797	0.85	17.13		4.18	8.772	5.01	7.86	3.77	0.15	1.21	2.83	0.1			28		217	117			44	49	62	15		25	276	25	91	4		203
1988	[2315] TIBA T. (1988)	IZU-BONIN ARC / IZU ARC / HONSHU / JAISHI//	138.5	35.5	28.04	VOLCANIC ROCK	ANDESITE, OLIVINE-HYPERSTHENE-AUGITE			QUATERNARY		57.08	0.932555	9.93333	42.2625	0.100671	0.82	17.37		4.65	8.255	4.07	6.75	3.39	0.17	1.63	2.79	0.1			22		168	66			24	34	51	14		30	298	30	101	4		228
1994	[3201] TAMURA Y. (1994)	IZU-BONIN ARC / IZU ARC / HONSHU / SHIRAHAMA GROUP//	138.7	35.2	28.04	VOLCANIC ROCK	THOLEIITE			NEOGENE		57.07	0.809183	7.30769	37.3488	0.0596491	1	16.34			8.94		7.53	2.99	0.22	0.81	3.42	0.25					188	8			3	22	113			17	285	39	96	3		108
1994	[3201] TAMURA Y. (1994)	IZU-BONIN ARC / IZU ARC / HONSHU / SHIRAHAMA GROUP//	138.7	35.2	28.04	VOLCANIC ROCK	THOLEIITE			NEOGENE		60.21	0.88617	6.32558	33.9724	0.0919118	0.8	17.06			5.82		6.35	1.68	0.15	1.39	3.77	0.26					86	4			0	15	74			25	272	43	157	5		167
1994	[3201] TAMURA Y. (1994)	IZU-BONIN ARC / IZU ARC / HONSHU / SHIRAHAMA GROUP//	138.7	35.2	28.04	VOLCANIC ROCK	THOLEIITE			NEOGENE		64.49	0.908655	6.17021	31.6971	0.0551724	0.86	15.49			5.07		4.31	1.32	0.12	1.23	4.79	0.34					60	0			2	6	82			16	290	47	139	4		148
1994	[3201] TAMURA Y. (1994)	IZU-BONIN ARC / IZU ARC / HONSHU / SHIRAHAMA GROUP//	138.7	35.2	28.04	VOLCANIC ROCK	BASALT, CALC-ALKALINE			NEOGENE		61.35	0.893976	7.61765	41.1651	0.0540541	0.76	16.43			6.7		6.5	2.63	0.16	0.97	3.35	0.17					127	6			3	14	58			14	259	34	103	3		147
1994	[3201] TAMURA Y. (1994)	IZU-BONIN ARC / IZU ARC / HONSHU / SHIRAHAMA GROUP//	138.7	35.2	28.04	VOLCANIC ROCK	BASALT, CALC-ALKALINE			NEOGENE		61.67	0.864488	11.7857	39.5281	0.0757576	0.66	16.25			5.89		6.26	2.16	0.16	1.38	3.6	0.18					113	5			3	13	53			25	330	28	109	4		199
1994	[3201] TAMURA Y. (1994)	IZU-BONIN ARC / IZU ARC / HONSHU / SHIRAHAMA GROUP//	138.7	35.2	28.04	VOLCANIC ROCK	BASALT, CALC-ALKALINE			NEOGENE		62.34	0.903248	9.07143	39.9364	0.0708661	0.62	16.1			5.71		5.83	2.13	0.15	1.31	3.53	0.17					97	5			4	11	62	18		18	254	28	108	3		128
1994	[3201] TAMURA Y. (1994)	IZU-BONIN ARC / IZU ARC / HONSHU / SHIRAHAMA GROUP//	138.7	35.2	28.04	VOLCANIC ROCK	BASALT, CALC-ALKALINE			NEOGENE		62.99	0.852218	7.82759	41.1238	0.092511	0.55	15.95			5.41		6.39	2.12	0.12	1.36	3.42	0.11					102	10			6	20	45			21	227	29	113	3		128
1994	[3201] TAMURA Y. (1994)	IZU-BONIN ARC / IZU ARC / HONSHU / SHIRAHAMA GROUP//	138.7	35.2	28.04	VOLCANIC ROCK	BASALT, CALC-ALKALINE			NEOGENE		64.21	0.905877	11.4167	42.134	0.0583942	0.58	15.73			5.41		5.5	2.21	0.15	1.12	3.74	0.17					82	9			5	11	53	15		16	274	24	97	3		158
1994	[3201] TAMURA Y. (1994)	IZU-BONIN ARC / IZU ARC / HONSHU / SHIRAHAMA GROUP//	138.7	35.2	28.04	VOLCANIC ROCK	BASALT, CALC-ALKALINE			NEOGENE		64.22	0.916298	10.7308	37.9546	0.114695	0.6	16.27			5.07		5.36	1.74	0.12	1.55	3.85	0.15					87	1			3	12		17		32	279	26	114	3		168
1994	[3201] TAMURA Y. (1994)	IZU-BONIN ARC / IZU ARC / HONSHU / SHIRAHAMA GROUP//	138.7	35.2	28.04	VOLCANIC ROCK	BASALT, CALC-ALKALINE			NEOGENE		65.18	0.951508	11.2917	39.4142	0.129151	0.54	15.9			4.74		5.13	1.73	0.13	1.35	3.6	0.13					78	0			2	10	52	16		35	271	24	119	3		155
1994	[3201] TAMURA Y. (1994)	IZU-BONIN ARC / IZU ARC / HONSHU / SHIRAHAMA GROUP//	138.7	35.2	28.04	VOLCANIC ROCK	BASALT, CALC-ALKALINE			NEOGENE		66.45	0.900492	7.67857	38.2232	0.0883721	0.5	15.32			4.35		4.97	1.51	0.11	1.26	4.02	0.11					63	0			3	12	38			19	215	28	133	3		194
1994	[3201] TAMURA Y. (1994)	IZU-BONIN ARC / IZU ARC / HONSHU / SHIRAHAMA GROUP//	138.7	35.2	28.04	VOLCANIC ROCK	NOT GIVEN			NEOGENE		57.13	0.872535	7.30303	41.9944	0.0539419	0.8	16.74			7.78		7.39	3.16	0.17	1.33	2.62	0.16					151	9			4	17	81			13	241	33	89	3		115
2011	[14967] BOODEN M. A. (2011)	NEW ZEALAND / NORTH ISLAND / NORTHLAND VOLCANIC ZONE / WHANGAROA-KARIKARI//	173.75	-35.05	25.3	VOLCANIC ROCK	ANDESITE, GARNET			MIOCENE		65.2783	0.980017	19.8478	42.8587	0.279565	0.560673	17.0104		1.23863	4.21134	3.09657	4.90589	1.77213	0.0700841	2.3328	3.59431	0.130156	1.12857			16.0868		103.161	62.4561		210.585	13.2968	14.4234	54.8238	17.5655		73.4288	262.654	13.2334	147.756	6.8341	3.75614	621.642
2011	[14967] BOODEN M. A. (2011)	NEW ZEALAND / NORTH ISLAND / NORTHLAND VOLCANIC ZONE / WHANGAROA-WAIRAKAU / WAIRAKAU ANDESITE/	173.75	-35.05	25.3	VOLCANIC ROCK	ANDESITE			MIOCENE		58.7551	0.901897	14.5947	44.3311	0.140286	0.922121	18.3522		1.68387	6.32655	4.81107	6.38468	2.8265	0.0801844	1.81417	4.11947	0.240553	0.490477			16.4087		155.168	35.0074		21.755	11.3614	21.0053	55.3466	18.1585		51.4996	367.105	25.1533	164.078	6.73176	1.3058	388.878
2011	[14967] BOODEN M. A. (2011)	NEW ZEALAND / NORTH ISLAND / NORTHLAND VOLCANIC ZONE / WHANGAROA-WAIRAKAU / WAIRAKAU ANDESITE/	173.75	-35.05	25.3	VOLCANIC ROCK	ANDESITE			MIOCENE		58.7765	0.818486	18.0143	44.7596	0.146955	0.969612	16.7233		1.92553	7.23448	5.5015	6.7473	3.28868	0.159936	2.08916	3.58856	0.219912	-1.00453			24.1153		196.602	70.7943		38.9085	16.0684	20.4054	59.5273	17.2463		57.8621	393.741	21.8572	147.816	7.15667	1.66378	506.312
2011	[14967] BOODEN M. A. (2011)	NEW ZEALAND / NORTH ISLAND / NORTHLAND VOLCANIC ZONE / WHANGAREI HEADS VOLCANIC COMPLEX//	174.53	-35.82	26.33	VOLCANIC ROCK	ANDESITE			MIOCENE		59.095	0.968236	12.2922	43.9315	0.179187	1.0011	17.7695		1.93361	7.26484	5.5246	6.70738	3.19351	0.220242	1.64181	2.66293	0.150165	2.29079			25.7496		165.35	16.5068		91.0322	7.0629	29.7913	672.751	16.5362		48.812	272.408	22.161	82.0296	6.43385	0.538328	255.096
2011	[14967] BOODEN M. A. (2011)	NEW ZEALAND / NORTH ISLAND / NORTHLAND VOLCANIC ZONE / WHANGAREI HEADS VOLCANIC COMPLEX//	174.53	-35.82	26.33	VOLCANIC ROCK	ANDESITE			MIOCENE		60.6045	0.962354	25.3385	41.366	0.133146	0.870784	18.5667		1.50765	5.66447	4.30758	5.95536	2.24202	0.0800721	1.37123	4.24382	0.230207	1.15032			8.75085		71.0043	21.7355		20.5865	11.8746	17.7064	53.0668	19.0927		43.0248	323.14	12.753	265.7	7.86929	3.87949	299.999
1998	[7659] EL BAKKALI S. (1998)	APENNINIC-MAGHREBIDES CHAIN / MAGHREBIDES / MOROCCO / GOUROUGOU VOLCANIC FIELD / STRATOVOLCANO/	-2.9	35.2	18.83	VOLCANIC ROCK	LATITE			NEOGENE		60.05	0.962016	20.8214	31.059	0.389365	0.58	19.1	4.44				4.65	1.01	0.06	5.38	3.39		1.66								3					227	583	28	178	24	9	1573	48.4
2005	[7519] DUGGEN S. (2005)	APENNINIC-MAGHREBIDES CHAIN / MAGHREBIDES / MOROCCO / GOUROUGOU VOLCANIC FIELD//	-2.9517	35.2617	18.83	VOLCANIC ROCK	TRACHYANDESITE			NEOGENE		58.57	0.80049	29.779	43.575	0.304267	0.77	16.67			6.2087		6.73	2.69	0.12	3.33	3.03	0.32					159	57		17	18		57	17		164	539	18.1	160	27.1046		708	36.2439
2005	[7519] DUGGEN S. (2005)	APENNINIC-MAGHREBIDES CHAIN / MAGHREBIDES / MOROCCO / GOUROUGOU VOLCANIC FIELD//	-2.9863	35.2502	18.83	VOLCANIC ROCK	TRACHYANDESITE			NEOGENE		57.8	0.774829	20.6	43.0385	0.265372	0.75	16.41			6.29868		6.82	2.67	0.11	3.43	3.08001	0.35					156	25		17	15		44	14		164	618	30	157			751
1998	[7659] EL BAKKALI S. (1998)	APENNINIC-MAGHREBIDES CHAIN / MAGHREBIDES / MOROCCO / GOUROUGOU VOLCANIC FIELD//	-2.9	35.3	18.83	VOLCANIC ROCK	ANDESITE			NEOGENE		56.8	0.736279	15.2414	44.8935	0.214932	0.8	15.8	7.05				6.8	2.9	0.13	2.37	3.97		2.7								5					95	442	29	177	9	10
2004	[7692] GILL R. C. O. (2004)	APENNINIC-MAGHREBIDES CHAIN / MAGHREBIDES / MOROCCO / GOUROUGOU VOLCANIC FIELD//	-2.9	35.3	18.83	VOLCANIC ROCK	NOT GIVEN			NEOGENE		59.92	0.836543	26.6029	42.2628	0.320144	0.67	16.84	6.25				5.95	2.31	0.12	3.71	3.22	0.31	0.84		14.3		132	16			11	42.5	51.9	15.4		178	556	20.9	172	36.1		763
2004	[7692] GILL R. C. O. (2004)	APENNINIC-MAGHREBIDES CHAIN / MAGHREBIDES / MOROCCO / GOUROUGOU VOLCANIC FIELD//	-2.9	35.3	18.83	VOLCANIC ROCK	LATITE			NEOGENE		59.43	0.804365	28.1731	44.3901	0.290102	0.69	16.64	6.55				6.43	2.64	0.13	3.57	3.12	0.32	0.47		16.7		149	20.5			11.7	30.9	54.5	15.7		170	586	20.8	162	34.1		727
2004	[7692] GILL R. C. O. (2004)	APENNINIC-MAGHREBIDES CHAIN / MAGHREBIDES / MOROCCO / GOUROUGOU VOLCANIC FIELD//	-2.9	35.3	18.83	VOLCANIC ROCK	ANDESITE			NEOGENE		58.83	0.802994	29.1866	44.0939	0.267213	0.71	16.67	6.83				6.68	2.72	0.13	3.43	2.98	0.33	0.52		18.1		154	21.3			12.2	84.9	48	15.7		163	610	20.9	157	32.5		722
2004	[7692] GILL R. C. O. (2004)	APENNINIC-MAGHREBIDES CHAIN / MAGHREBIDES / MOROCCO / GOUROUGOU VOLCANIC FIELD//	-2.9	35.3	18.83	VOLCANIC ROCK	LATITE			NEOGENE		58.82	0.839492	20.748	41.3795	0.383302	0.73	16.87	6.93				5.67	2.47	0.12	4.3	3.12	0.35	0.68		14.4		145	12.9			10.3	23.8	52.5	15.8		202	527	25.4	187	29.4		784
1999	[10043] EL AZZOUZI M. (1999)	APENNINIC-MAGHREBIDES CHAIN / MAGHREBIDES / MOROCCO / GOUROUGOU VOLCANIC FIELD//	-2.9	35.3	18.83	VOLCANIC ROCK	LATITE			NEOGENE		60.2	0.868677	27.6923	44.3715	0.362963	0.62	16.1	5.09				5.48	2.05	0.07	3.45	2.94	0.4	2.7		16.5		148	16		10	6					196	540	19.5	165	16		1560	36
2004	[7847] DUGGEN S. (2004)	APENNINIC-MAGHREBIDES CHAIN / MAGHREBIDES / MOROCCO / TROIS FOURCHES VOLCANIC FIELD//	-2.9635	35.4093	18.83	VOLCANIC ROCK	DACITE			NEOGENE		62.4	0.803496	19.7129	38.9601	0.23301	0.76	15.6			3.77		6.19	1.35	0.07	2.57	3.27	0.2		19.9				175		12	42		48	20		96	412	20.9	197	9.86	0.99	688	30
1998	[7659] EL BAKKALI S. (1998)	APENNINIC-MAGHREBIDES CHAIN / MAGHREBIDES / MOROCCO / GOUROUGOU VOLCANIC FIELD / STRATOVOLCANO/	-3.02	35.25	19.8	VOLCANIC ROCK	LATITE			NEOGENE		56.65	0.783272	19.3448	42.924	0.358289	0.81	16.89	7.4				6.61	2.81	0.11	4.29	2.98		0.65								9					201	561	29	146	25	7	1046	46.5
1998	[7659] EL BAKKALI S. (1998)	APENNINIC-MAGHREBIDES CHAIN / MAGHREBIDES / MOROCCO / GOUROUGOU VOLCANIC FIELD / STRATOVOLCANO/	-3.03	35.27	19.8	VOLCANIC ROCK	LATITE			NEOGENE		58.2	0.699861	19.4333	43.6453	0.267581	0.71	15.8	6.93				6.7	2.71	0.12	3.98	3.7		1.07								11					156	583	30	140	29	0	770	48.5
2005	[7519] DUGGEN S. (2005)	APENNINIC-MAGHREBIDES CHAIN / MAGHREBIDES / MOROCCO / GOUROUGOU VOLCANIC FIELD//	-3.1035	35.2142	19.8	VOLCANIC ROCK	TRACHYANDESITE			NEOGENE		57.44	0.809671	24.1991	39.8039	0.388193	0.79	16.82			6.33467		6.04	2.35	0.09	4.67	2.88	0.38					166	40		15	11		70	20		217	559	23.1	212	24.7865	6.04302	1062	41.9745
2005	[7519] DUGGEN S. (2005)	APENNINIC-MAGHREBIDES CHAIN / MAGHREBIDES / MOROCCO / GOUROUGOU VOLCANIC FIELD//	-3.0168	35.234	19.8	VOLCANIC ROCK	ANDESITE			NEOGENE		57.34	0.866462	19.7143	33.9873	0.376812	0.78	17.7			6.12771		5.51	1.77	0.13	4.86	3.13044	0.39					129			13			28	14		208	552	28	186			1721
2004	[7847] DUGGEN S. (2004)	APENNINIC-MAGHREBIDES CHAIN / MAGHREBIDES / MOROCCO / RAS TARF VOLCANIC FIELD//	-3.7545	35.192	19.8	VOLCANIC ROCK	ANDESITE			NEOGENE		57.7	0.903853	12.9615	39.5029	0.249258	0.88	17.4			7.07		7.32	2.59	0.09	2.04	2.27	0.23						25		22	13		69	18		84	337	26	156			523
2004	[7847] DUGGEN S. (2004)	BETIC-RIF OROGENIC BELT (GIBRALTAR ARC) / ALBORAN RIDGE / ALBORAN ISLAND///	-3.03	35.93	19.8	VOLCANIC ROCK	DACITE			NEOGENE		61.9	0.872608	6.11765	34.3665	0.0769231	0.47	17.4			4.97		8.79	1.46	0.07	0.39	2.15	0.09						28		20	18		41	15		8	104	17	42	0.46		20	2.2
2008	[12611] DUGGEN S.(2008) [GeoReM [4334] ]	BETIC-RIF OROGENIC BELT (GIBRALTAR ARC) / ALBORAN RIDGE / ALBORAN ISLAND///	-3.0322	35.9412	19.8	VOLCANIC ROCK	ANDESITE			MIOCENE		59.7	0.899047	7.25	29.9554	0.0689655	0.52	20	3.89		0		9.94	0.84	0.07	0.33	2.32	0.09					192	19		15	0		76	18		8	116	16	31			44
2008	[12611] DUGGEN S.(2008) [GeoReM [4334] ]	BETIC-RIF OROGENIC BELT (GIBRALTAR ARC) / ALBORAN RIDGE / ALBORAN ISLAND///	-3.0355	35.9378	19.8	VOLCANIC ROCK	ANDESITE			MIOCENE		56.2	0.816424	3.65517	44.1075	0.0471698	0.61	17.4	9.11		0		9.54	3.63	0.14	0.17	2.3	0.19					293	37		27	0		102	17		5	106	29	38			52
2008	[12611] DUGGEN S.(2008) [GeoReM [4334] ]	BETIC-RIF OROGENIC BELT (GIBRALTAR ARC) / ALBORAN RIDGE / ALBORAN ISLAND///	-3.0367	35.9385	19.8	VOLCANIC ROCK	ANDESITE			MIOCENE		61.3	0.920303	7.76224	29.0073	0.10991	0.53	19.8	4.12		0		9.5	0.85	0.06	0.5	2.25	0.08		7.89	28.4		246	22		13	2.12	23.1	103	14		12.2	111	14.3	30	0.25	0.43	20	1.4
2015	[19886] LITVAK V. D. (2015)	ANDEAN ARC / SOUTHERN ANDEAN VOLCANIC ZONE / ARGENTINA / CERRO CHORREADO//	-68.8767	-35.7181	35.44	VOLCANIC ROCK	ANDESITE	10000000	15000000	MIOCENE		60.39	0.845863	40.2273	43.7428	0.0861582	0.634	16.87	5.68				6.21	2.23	0.14	2.25	3.78	0.27	1.28		12			0		10	0	10	70	17		61	708	17.6	119	8.1	2.9	1199	22.3
2015	[19886] LITVAK V. D. (2015)	ANDEAN ARC / SOUTHERN ANDEAN VOLCANIC ZONE / ARGENTINA / CERRO EL ZAINO//	-68.8631	-35.0808	35.44	VOLCANIC ROCK	ANDESITE	10000000	15000000	MIOCENE		62.19	0.852286	39.3392	35.9943	0.18589	0.597	17.25	4.86				4.85	1.38	0.15	3.85	4.41	0.29	0.34		5			0		8	0	10	60	19		166	893	22.7	225	17.7	6.8	976	42.1
2015	[19886] LITVAK V. D. (2015)	ANDEAN ARC / SOUTHERN ANDEAN VOLCANIC ZONE / ARGENTINA / CERRO LOS CERRITOS//	-68.745	-35.2844	35.44	VOLCANIC ROCK	ANDESITE	3500000	8000000	PLIOCENE		57.79	0.819446	93.1298	44.4547	0.137705	0.599	18.69	5.84				7.73	2.36	0.167	2.13	3.92	0.31	0.54		13			0		9	0	30	40	17		168	1220	13.1	165	5.7	1.1	921	33.7
2015	[19886] LITVAK V. D. (2015)	ANDEAN ARC / SOUTHERN ANDEAN VOLCANIC ZONE / ARGENTINA / CERRO PLATEADOO//	-68.5061	-35.7647	35.44	VOLCANIC ROCK	ANDESITE	3500000	8000000	PLIOCENE		64.89	0.945652	56.5899	40.4075	0.0610749	0.336	17.76	2.95				4.1	1.01	0.083	2.47	5.26	0.19	1.45		3			0		5	0	0	50	17		75	1228	21.7	152	6.5	2.7	1266	20
2015	[19886] LITVAK V. D. (2015)	ANDEAN ARC / SOUTHERN ANDEAN VOLCANIC ZONE / ARGENTINA / CERRO PLATEADOO//	-68.5481	-35.6728	35.44	VOLCANIC ROCK	ANDESITE	3500000	8000000	PLIOCENE		67.17	0.985171	88.0328	42.5462	0.047486	0.258	16.65	2.3				3.32	0.86	0.057	2.18	5.17	0.14	1.4		3			0		4	0	0	0	15		51	1074	12.2	121	4.7	2.3	1290	13.4
2015	[19886] LITVAK V. D. (2015)	ANDEAN ARC / SOUTHERN ANDEAN VOLCANIC ZONE / ARGENTINA / CERRO PUNTUDO//	-68.7556	-35.9411	35.44	VOLCANIC ROCK	ANDESITE	10000000	15000000	MIOCENE		60.74	0.848231	44.3284	40.5797	0.0920314	0.608	17.07	5.51				6.19	1.9	0.167	2.45	3.78	0.32	0.96		9			0		8	0	10	60	17		82	891	20.1	149	9.7	4	1040	22
1995	[3648] TORMEY D. R. (1995)	ANDEAN ARC / SOUTHERN ANDEAN VOLCANIC ZONE / CHILE / AZUFRE//	-68.8	-35.25	35.44	VOLCANIC ROCK	ANDESITE, BASALTIC			QUATERNARY		57.02	0.935597	21.0435	35.7185	0.0838843	0.93	19.41		7.41			7.32	2.31	0.12	1.4	3.6	0.23			21.7		175	30.9		15.9	15		86	20.3		40.6	484	23	138	4	1.53	324	15.6
1995	[3648] TORMEY D. R. (1995)	ANDEAN ARC / SOUTHERN ANDEAN VOLCANIC ZONE / CHILE / AZUFRE//	-68.8	-35.25	35.44	VOLCANIC ROCK	DACITE			QUATERNARY		63.35	0.888492	6.97789	30.197	0.387324	1.05	15.7		6.51			3.86	1.58	0.13	3.2	4.37	0.34			15.7		214	4		8.7	7		90	18.5		110	284	40.7	300	11.2	4.3	638	34.1
1995	[3648] TORMEY D. R. (1995)	ANDEAN ARC / SOUTHERN ANDEAN VOLCANIC ZONE / CHILE / AZUFRE//	-68.8	-35.25	35.44	VOLCANIC ROCK	DACITE			QUATERNARY		63.16	0.900834	9.46237	30.965	0.204545	0.91	16.51		6.08			3.86	1.53	0.15	2.5	5.23	0.36					42				7		98	19		72	352	37.2	268	9.3		603
1995	[3648] TORMEY D. R. (1995)	ANDEAN ARC / SOUTHERN ANDEAN VOLCANIC ZONE / CHILE / AZUFRE//	-68.8	-35.25	35.44	VOLCANIC ROCK	DACITE			QUATERNARY		63.9	0.898686	6.46489	25.9738	0.353933	0.95	15.63		6.35			3.44	1.25	0.13	3.01	4.79	0.32			16.5		43	3.4		6.3	7.5		93	19		94.5	267	41.3	284	9.7	3.99	652	32.4
1995	[3648] TORMEY D. R. (1995)	ANDEAN ARC / SOUTHERN ANDEAN VOLCANIC ZONE / CHILE / AZUFRE//	-68.8	-35.25	35.44	VOLCANIC ROCK	DACITE			QUATERNARY		64.8	0.931173	6.83215	29.0794	0.384083	0.84	16.06		5.26			3.32	1.21	0.13	3.26	4.67	0.28			14.1		20	4.1		5	1.2		81	18		111	289	42.3	292	9.9	3.68	621	35.1
1995	[3648] TORMEY D. R. (1995)	ANDEAN ARC / SOUTHERN ANDEAN VOLCANIC ZONE / CHILE / AZUFRE//	-68.8	-35.25	35.44	VOLCANIC ROCK	DACITE			QUATERNARY		64.2	0.894765	6.13426	24.714	0.384906	0.89	15.63		6.19			3.32	1.14	0.13	3.13	4.89	0.29					42				8.4		91	19		102	265	43.2	309	10.8		689
1995	[3648] TORMEY D. R. (1995)	ANDEAN ARC / SOUTHERN ANDEAN VOLCANIC ZONE / CHILE / AZUFRE//	-68.8	-35.25	35.44	VOLCANIC ROCK	DACITE			QUATERNARY		65.3	0.933398	6.68235	21.9732	0.309155	0.65	16.02		5.38			2.94	0.85	0.13	3	5.21	0.21					12				7		93	21		87.8	284	42.5	321	10		704
2013	[18602] SOAGER N.(2013) [GeoReM [7576] ]	ANDEAN ARC / SOUTHERN ANDEAN VOLCANIC ZONE / ARGENTINA / EL GAUCHO//	-70.0502	-35.8292	52.03	VOLCANIC ROCK	DACITE			PLEISTOCENE-HOLOCENE		67.27	0.965055	6.4234	27.982	0.375523	0.75	15.76	3.67				2.35	0.72	0.11	3.07	5.31	0.23	0.6		19.6187	0.457708	48.9125	3.40773	0.0826219	3.81795	2.48788	9.74675	53.6696	19.9492		89.1105	237.297	36.9426	269.003	10.6704	3.04393	748.949	31.9666
2013	[18602] SOAGER N.(2013) [GeoReM [7576] ]	ANDEAN ARC / SOUTHERN ANDEAN VOLCANIC ZONE / ARGENTINA / EL GAUCHO//	-70.0502	-35.8292	52.03	VOLCANIC ROCK	DACITE			PLEISTOCENE-HOLOCENE		66.87	0.913384	5.97956	32.6998	0.380554	0.74	15.62	3.75				2.53	0.92	0.11	3.13	5.54	0.22	0.4		13.8483	0.444438	48.2132	3.12616	0.083969	32.5862	1.98204	8.9173	58.2906	18.9337		84.2877	221.487	37.0406	274.415	10.6994	3.26648	727.175	31.3819
2020	[23838] SRUOGA P. (2020)	ANDEAN ARC / SOUTHERN ANDEAN VOLCANIC ZONE / CHILE / CORDON DEL BURRERO GROUP - SANTA ELENA FORMATION//	-70.28	-35.12	52.03	PLUTONIC ROCK	DIORITE			MIOCENE		62.49	0.9874	22.0526	42.0563	0.186158	0.676	16.5	5.43				4.2	1.99	0.073	2.73	3.72	0.22	1.7				85	0		17	0	0	40	18		78	419	19	193	8	0.9	526	22.9
2020	[23838] SRUOGA P. (2020)	ANDEAN ARC / SOUTHERN ANDEAN VOLCANIC ZONE / CHILE / HUINCAN FORMATION//	-70.28	-35.12	52.03	VOLCANIC ROCK	DACITE			MIOCENE		63.2	0.93519	22.92	43.2965	0.263775	0.66	17.13	4.98				4.14	1.92	0.09	3.16	4.48	0.22					72	10		15	7	53	101	19		105.8	401.1	17.5	162	7	3.1	463.9	21.7
1995	[3648] TORMEY D. R. (1995)	ANDEAN ARC / SOUTHERN ANDEAN VOLCANIC ZONE / CHILE / PLANCHON-PETEROA//	-70.57	-35.24	52.03	VOLCANIC ROCK	ANDESITE			QUATERNARY		56.07	0.888729	22.6389	42.5694	0.0828221	0.97	18.31		8.2			6.89	3.41	0.14	1.64	3.83	0.23			20.2		168	20.9		21.5	19		79	19.3		40.5	489	21.6	171	5	1.2	461	16.2
1995	[3648] TORMEY D. R. (1995)	ANDEAN ARC / SOUTHERN ANDEAN VOLCANIC ZONE / CHILE / PLANCHON-PETEROA//	-70.57	-35.24	52.03	VOLCANIC ROCK	ANDESITE			QUATERNARY		56.06	0.874822	22.6512	42.179	0.0821355	0.96	18.42		8.21			6.88	3.36	0.14	1.65	4.11	0.24			19.9		156	20.6		21.2	17		82	19.6		40	487	21.5	171	5	1.39	434	16.2
1995	[3648] TORMEY D. R. (1995)	ANDEAN ARC / SOUTHERN ANDEAN VOLCANIC ZONE / CHILE / PLANCHON-PETEROA//	-70.57	-35.24	52.03	VOLCANIC ROCK	ANDESITE			QUATERNARY		56.8	0.883062	18.93	40.7699	0.0845652	1.04	17.84		8.39			6.88	3.24	0.15	1.5	3.69	0.23			23.2		177	8.4		17	9		88	19.9		38.9	460	24.3	159	5.5	1.34	460	17.3
1995	[3648] TORMEY D. R. (1995)	ANDEAN ARC / SOUTHERN ANDEAN VOLCANIC ZONE / CHILE / PLANCHON-PETEROA//	-70.57	-35.24	52.03	VOLCANIC ROCK	ANDESITE			QUATERNARY		56.85	0.890703	17.029	40.0818	0.0723404	1.03	17.79		8.42			6.75	3.16	0.14	1.4	3.76	0.22			23.4		201	9.5		17	11		93	20.3		34	470	27.6	148	6	0.69	510	18.1
1995	[3648] TORMEY D. R. (1995)	ANDEAN ARC / SOUTHERN ANDEAN VOLCANIC ZONE / CHILE / PLANCHON-PETEROA//	-70.57	-35.24	52.03	VOLCANIC ROCK	ANDESITE			QUATERNARY		56.19	0.881845	14.5724	36.7897	0.0896163	1.1	17.77		8.82			6.81	2.88	0.17	1.57	3.69	0.28					168				9		87	20.3		39.7	443	30.4	169	6		402
1995	[3648] TORMEY D. R. (1995)	ANDEAN ARC / SOUTHERN ANDEAN VOLCANIC ZONE / CHILE / PLANCHON-PETEROA//	-70.57	-35.24	52.03	VOLCANIC ROCK	RHYODACITE, BIOTITE			QUATERNARY		61.72	0.864557	15.2402	43.5536	0.315186	0.78	16.28		5.96			4.93	2.58	0.11	2.9	4.09	0.17					125				13		67	18.1		110	349	22.9	226	7		490
1995	[3648] TORMEY D. R. (1995)	ANDEAN ARC / SOUTHERN ANDEAN VOLCANIC ZONE / CHILE / PLANCHON-PETEROA//	-70.57	-35.24	52.03	VOLCANIC ROCK	DACITE, BIOTITE			QUATERNARY		63.36	0.886096	12.2695	37.1045	0.33237	0.85	16.21		5.65			4.25	1.87	0.11	3.06	4.41	0.22			14.4		106	8.6		10.4	11		62	18.9		115	346	28.2	288	10	5.24	564	27.1
2012	[15990] RUPRECHT P. (2012)	ANDEAN ARC / SOUTHERN ANDEAN VOLCANIC ZONE / CHILE / QUIZAPU//	-70.85	-35.58	52.03	VOLCANIC ROCK	DACITE			HOLOCENE	1846	64.67	0.924218	13.5417	39.8179	0.289231	0.59	15.8			3.61		3.15	1.34	0.09	2.98	4.95	0.15			11		66	34			19	19	63	19		94	325	24	238	7		576	18
2012	[15990] RUPRECHT P. (2012)	ANDEAN ARC / SOUTHERN ANDEAN VOLCANIC ZONE / CHILE / QUIZAPU//	-70.85	-35.58	52.03	VOLCANIC ROCK	DACITE			HOLOCENE	1846	65.89	0.948586	11.75	35.4004	0.365248	0.56	15.62			3.09		2.48	0.95	0.09	3.19	5.17	0.15			9		44	18			12	10	61	19		103	282	24	255	8		608	22
2012	[15990] RUPRECHT P. (2012)	ANDEAN ARC / SOUTHERN ANDEAN VOLCANIC ZONE / CHILE / QUIZAPU//	-70.85	-35.58	52.03	VOLCANIC ROCK	DACITE			HOLOCENE	1846	65.71	0.947671	11.4583	35.6155	0.363636	0.56	15.52			3.19		2.5	0.99	0.09	3.18	5.1	0.15			9		44	26			17	12	60	18		100	275	24	252	8		605	23
2012	[15990] RUPRECHT P. (2012)	ANDEAN ARC / SOUTHERN ANDEAN VOLCANIC ZONE / CHILE / QUIZAPU//	-70.85	-35.58	52.03	VOLCANIC ROCK	DACITE			HOLOCENE	1846	66.58	0.941682	11.5833	35.0342	0.370504	0.57	15.66			3.14		2.54	0.95	0.09	3.24	5.17	0.15			9		44	12			4	12	63	18		103	278	24	255	7		611	25
2012	[15990] RUPRECHT P. (2012)	ANDEAN ARC / SOUTHERN ANDEAN VOLCANIC ZONE / CHILE / QUIZAPU//	-70.85	-35.58	52.03	VOLCANIC ROCK	DACITE			HOLOCENE	1846	65.8	0.950058	11.2917	35.4004	0.369004	0.56	15.49			3.09		2.43	0.95	0.09	3.2	5.12	0.15			8		43	19			13	9	62	19		100	271	24	253	8		613	26
2012	[15990] RUPRECHT P. (2012)	ANDEAN ARC / SOUTHERN ANDEAN VOLCANIC ZONE / CHILE / QUIZAPU//	-70.85	-35.58	52.03	VOLCANIC ROCK	DACITE			HOLOCENE	1846	63.29	0.915995	14.8696	43.3488	0.254386	0.64	16			3.96		3.57	1.7	0.1	2.77	4.85	0.16			11		79	48			29	18	64	19		87	342	23	222	7		543	21
2012	[15990] RUPRECHT P. (2012)	ANDEAN ARC / SOUTHERN ANDEAN VOLCANIC ZONE / CHILE / QUIZAPU//	-70.85	-35.58	52.03	VOLCANIC ROCK	DACITE			HOLOCENE	1846	65.27	0.92548	12.64	39.4092	0.306962	0.6	15.83			3.59		3.08	1.31	0.09	3.03	5	0.15			10		62	33			20	16	62	19		97	316	25	243	8		578	25
2012	[15990] RUPRECHT P. (2012)	ANDEAN ARC / SOUTHERN ANDEAN VOLCANIC ZONE / CHILE / QUIZAPU//	-70.85	-35.58	52.03	VOLCANIC ROCK	DACITE			HOLOCENE	1846	63.88	0.895221	15.0417	42.6172	0.238227	0.64	16.07			4.08		3.83	1.7	0.1	2.78	4.85	0.16			11		82	22			8	28	64	17		86	361	24	222	6		545	20
2012	[15990] RUPRECHT P. (2012)	ANDEAN ARC / SOUTHERN ANDEAN VOLCANIC ZONE / CHILE / QUIZAPU//	-70.85	-35.58	52.03	VOLCANIC ROCK	DACITE			HOLOCENE	1846	66.82	0.944122	11.08	35.1281	0.375451	0.57	15.73			3.16		2.53	0.96	0.09	3.24	5.2	0.15			9		43	9			5	16	64	17		104	277	25	257	7		619	23
2012	[15990] RUPRECHT P. (2012)	ANDEAN ARC / SOUTHERN ANDEAN VOLCANIC ZONE / CHILE / QUIZAPU//	-70.85	-35.58	52.03	VOLCANIC ROCK	DACITE			HOLOCENE	1846	66.63	0.944203	12.25	34.8654	0.346939	0.57	15.8			3.23		2.63	0.97	0.09	3.2	5.16	0.15			8		46	18			8	15	61	18		102	294	24	247	7		617	24
2012	[15990] RUPRECHT P. (2012)	ANDEAN ARC / SOUTHERN ANDEAN VOLCANIC ZONE / CHILE / QUIZAPU//	-70.85	-35.58	52.03	VOLCANIC ROCK	DACITE			HOLOCENE	1846	65.99	0.936063	13.0833	36.2552	0.312102	0.6	15.93			3.51		2.9	1.12	0.1	3.07	5.12	0.17			8		56	17			8	14	67	19		98	314	24	239	6		599	25
2012	[15990] RUPRECHT P. (2012)	ANDEAN ARC / SOUTHERN ANDEAN VOLCANIC ZONE / CHILE / QUIZAPU//	-70.85	-35.58	52.03	VOLCANIC ROCK	DACITE			HOLOCENE	1846	64.73	0.903848	14.1667	41.0617	0.264706	0.63	15.96			3.94		3.51	1.54	0.1	2.91	4.94	0.16			12		74	19			7	25	66	18		90	340	24	231	6		561	24
2012	[15990] RUPRECHT P. (2012)	ANDEAN ARC / SOUTHERN ANDEAN VOLCANIC ZONE / CHILE / QUIZAPU//	-70.85	-35.58	52.03	VOLCANIC ROCK	DACITE			HOLOCENE	1932	66.3	0.955038	10.76	34.5316	0.394052	0.53	15.46			2.94		2.3	0.87	0.09	3.25	5.16	0.14			8		37	13			13	7	60	18		106	269	25	254	7		612	24
2012	[15990] RUPRECHT P. (2012)	ANDEAN ARC / SOUTHERN ANDEAN VOLCANIC ZONE / CHILE / QUIZAPU//	-70.85	-35.58	52.03	VOLCANIC ROCK	DACITE			HOLOCENE	1932	66.85	0.95482	11.4167	35.287	0.394161	0.55	15.64			3.04		2.4	0.93	0.09	3.29	5.14	0.14			9		39	12			10	15	61	17		108	274	24	252	8		612	25
2012	[15990] RUPRECHT P. (2012)	ANDEAN ARC / SOUTHERN ANDEAN VOLCANIC ZONE / CHILE / QUIZAPU//	-70.85	-35.58	52.03	VOLCANIC ROCK	DACITE			HOLOCENE	1932	66.64	0.955839	11.3333	34.6368	0.386029	0.54	15.6			2.96		2.34	0.88	0.09	3.26	5.19	0.14			7		36	6			8	12	61	19		105	272	24	255	7		621	24
2012	[15990] RUPRECHT P. (2012)	ANDEAN ARC / SOUTHERN ANDEAN VOLCANIC ZONE / CHILE / QUIZAPU//	-70.85	-35.58	52.03	VOLCANIC ROCK	DACITE			HOLOCENE	1932	66.22	0.950972	11.12	34.0616	0.366906	0.57	15.6			3.14		2.47	0.91	0.09	3.21	5.13	0.15			8		41	11			5	9	62	18		102	278	25	252	6		616	22
2012	[15990] RUPRECHT P. (2012)	ANDEAN ARC / SOUTHERN ANDEAN VOLCANIC ZONE / CHILE / QUIZAPU//	-70.85	-35.58	52.03	VOLCANIC ROCK	DACITE			HOLOCENE	1932	66.5	0.948755	10.6	34.3025	0.392453	0.54	15.47			2.97		2.38	0.87	0.09	3.27	5.13	0.14			8		40	11			5	12	61	18		104	265	25	256	7		617	24
2012	[15990] RUPRECHT P. (2012)	ANDEAN ARC / SOUTHERN ANDEAN VOLCANIC ZONE / CHILE / QUIZAPU//	-70.85	-35.58	52.03	VOLCANIC ROCK	DACITE			HOLOCENE	1932	66.41	0.950166	11.0833	34.2708	0.394737	0.54	15.5			2.94		2.36	0.86	0.09	3.28	5.15	0.14			7		36	8			4	12	60	18		105	266	24	255	6		620	24
2012	[15990] RUPRECHT P. (2012)	ANDEAN ARC / SOUTHERN ANDEAN VOLCANIC ZONE / CHILE / QUIZAPU//	-70.85	-35.58	52.03	VOLCANIC ROCK	DACITE			HOLOCENE	1932	66.42	0.948839	11.32	34.9154	0.367491	0.55	15.71			3.09		2.53	0.93	0.09	3.22	5.15	0.14			8		43	12			5	9	62	17		104	283	25	247	6		609	22
1988	[3627] DAVIDSON J. P. (1988)	ANDEAN ARC / SOUTHERN ANDEAN VOLCANIC ZONE / CHILE / SAN PEDRO-PELLADO/TATARA / SAN PEDRO LAVA	-70.5	-36	52.03	VOLCANIC ROCK	DACITE			QUATERNARY		62.9	0.893337	8.95	32.5896	0.256983	1.05	16.31	5.94				3.98	1.45	0.12	3.1	4.66	0.37			13.1						13					92	358	40	313			558	32.2
1988	[3627] DAVIDSON J. P. (1988)	ANDEAN ARC / SOUTHERN ANDEAN VOLCANIC ZONE / CHILE / SAN PEDRO-PELLADO/TATARA/	-70.5	-36	52.03	VOLCANIC ROCK	ANDESITE			QUATERNARY		56.5	0.881984	22.5556	38.7388	0.0426929	1.2	18.78	7.36				6.89	2.35	0.15	1.29	4.48	0.37			20.3						11					26	609	27	135			372	18.1
1988	[3627] DAVIDSON J. P. (1988)	ANDEAN ARC / SOUTHERN ANDEAN VOLCANIC ZONE / CHILE / SAN PEDRO-PELLADO/TATARA/	-70.5	-36	52.03	VOLCANIC ROCK	ANDESITE			QUATERNARY		58.3	0.863815	17.8667	40.7155	0.0652985	1.1	18.14	7.44				6.74	2.58	0.14	1.56	4.29	0.36			21.2						13					35	536	30	158			405	21
1988	[3627] DAVIDSON J. P. (1988)	ANDEAN ARC / SOUTHERN ANDEAN VOLCANIC ZONE / CHILE / SAN PEDRO-PELLADO/TATARA/	-70.5	-36	52.03	VOLCANIC ROCK	ANDESITE			QUATERNARY		61.2	0.866714	19.5	37.5872	0.198135	1.01	16.13	6.61				4.64	2.01	0.11	2.5	4.54	0.31			15.8						18					85	429	22	191			536	25.3
2002	[5180] COSTA F. G. (2002)	ANDEAN ARC / SOUTHERN ANDEAN VOLCANIC ZONE / CHILE / SAN PEDRO-PELLADO/TATARA/	-70.83	-36	52.03	VOLCANIC ROCK	NOT GIVEN			HOLOCENE		57.3	0.850636	33.5294	43.6235	0.0754386	1.16	17.85			7.21		6.75	3.13	0.15	1.62	4.23	0.32			17.1		124	0		16	8		74			43	570	17	118	4.2	1.3	383	14.7
1999	[6220] VERGARA M. M. (1999)	ANDEAN ARC / SOUTHERN ANDEAN VOLCANIC ZONE / CHILE / COLBUN FORMATION//	-71.2	-35.83	41.5	VOLCANIC ROCK	ANDESITE			NEOGENE		62.15	0.941884	5.52632	33.6258	0.104762	0.82	15.93		2.24	6.896	4.88	5.05	1.96	0.15	1.17	3.93	0.16	1.35		23		125	4		14	8	18	91			22	210	38	124	7		261	10
1999	[6220] VERGARA M. M. (1999)	ANDEAN ARC / SOUTHERN ANDEAN VOLCANIC ZONE / CHILE / COLBUN FORMATION//	-71.2	-35.83	41.5	VOLCANIC ROCK	DACITE			NEOGENE		62.41	0.967283	11.84	28.0575	0.114865	0.81	15.67		4.1	6.17	2.48	4.15	1.35	0.11	1.4	4.34	0.17	3.02		18		99	17		16	1.1	16	75			34	296	25	117	9		258	11
2006	[9547] FERLA P. (2006)	SICILY CHANNEL RIFT / PANTELLERIA////	11.9888	36.793	15.42	VOLCANIC ROCK	PANTELLERITE			PLEISTOCENE		56.11	0.723403	15.5238	25.9855	0.0460123	2	16.09			9.24		5.23	1.82	0.31	2.25	6.26	0.7	1.19				125	3			6					15	326	21	207	74		1583	64
2006	[9547] FERLA P. (2006)	SICILY CHANNEL RIFT / PANTELLERIA////	11.9962	36.7758	15.42	PLUTONIC ROCK	DIORITE			PLEISTOCENE		56.54	0.726513	14.5882	25.3087	0.0927419	1.92	16.09			8.89		5.07	1.69	0.28	2.37	6.3	0.79	0.25				124	4			4					23	248	17	163	58		1426	67
2006	[9547] FERLA P. (2006)	SICILY CHANNEL RIFT / PANTELLERIA////	11.9963	36.7758	15.42	PLUTONIC ROCK	DIORITE			PLEISTOCENE		58.11	0.774407	22.5385	26.9588	0.0887372	1.57	16.55			7.92		4.44	1.64	0.29	2.59	6.38	0.43	0.84				112	8			6					26	293	13	186	61		1416	45
2006	[9547] FERLA P. (2006)	SICILY CHANNEL RIFT / PANTELLERIA////	11.9945	36.7768	15.42	PLUTONIC ROCK	DIORITE			PLEISTOCENE		58.29	0.778784	15.2632	26.4959	0.127586	1.81	16.03			8.06		4.06	1.63	0.27	2.85	6.15	0.64	0.94				98	5			6					37	290	19	238	83		1105	77
2006	[9547] FERLA P. (2006)	SICILY CHANNEL RIFT / PANTELLERIA////	11.9985	36.777	15.42	VOLCANIC ROCK	TRACHYTE			PLEISTOCENE		59.03	0.819471	11.6429	28.6897	0.184049	1.33	16.94			7		2.82	1.58	0.28	3.51	7.14	0.37	1.59				59	6			6					30	163	14	270			1349	80
2006	[9547] FERLA P. (2006)	SICILY CHANNEL RIFT / PANTELLERIA////	11.9985	36.7753	15.42	VOLCANIC ROCK	TRACHYTE			PLEISTOCENE		60.32	0.782254	7.25	26.9755	0.264368	1.3	15.98			6.9		2.85	1.43	0.29	3.66	6.86	0.42	1.42				57	7			8					46	174	24	297			1331	71
2006	[9547] FERLA P. (2006)	SICILY CHANNEL RIFT / PANTELLERIA////	12.0238	36.8105	12.81	VOLCANIC ROCK	TRACHYTE			PLEISTOCENE		59.98	0.770543	6.35556	24.7681	0.111888	1.48	16.24			6.93		3.3	1.28	0.23	2.53	7.5	0.53	0.54													32	286	45	196	60
2006	[9547] FERLA P. (2006)	SICILY CHANNEL RIFT / PANTELLERIA////	12.0045	36.7952	12.81	PLUTONIC ROCK	DIORITE			PLEISTOCENE		56.55	0.717378	17.8125	25.8284	0.0421053	1.99	15.87			9.06		4.93	1.77	0.3	2.4	6.42	0.71	0.27		24		154	7			6	44		55		12	285	16	199	66	0.27	1503	70
2006	[9547] FERLA P. (2006)	SICILY CHANNEL RIFT / PANTELLERIA////	12.0045	36.7952	12.81	PLUTONIC ROCK	DIORITE			PLEISTOCENE		57.14	0.742125	7.8	26.978	0.0842491	1.97	16.27			8.25		4.99	1.71	0.25	2.45	6.2	0.77	0.62		25		104	13			14	70		67		23	273	35	203	57	0.1	1194	96
1998	[17010] SONG SUCK HWAN (1998)	HONSHU ARC / EAST SEA (SEA OF JAPAN) BACK-ARC BASIN / KOREAN PENINSULA///	125.25	36.2	31.75	VOLCANIC ROCK	ANDESITE			MIOCENE		58.73	0.992191	15.2152	39.3927	0.0804621	0.7	18.19	7.77				6.7	2.55	0.08	1.58	2.7	0.21														40.4	502.1	33	174			374	16.7
1998	[17010] SONG SUCK HWAN (1998)	HONSHU ARC / EAST SEA (SEA OF JAPAN) BACK-ARC BASIN / KOREAN PENINSULA///	125.25	36.2	31.75	VOLCANIC ROCK	ANDESITE			MIOCENE		57.83	0.955461	29.6455	43.6145	0.0466115	0.36	18.97	7.63				7.23	2.98	0.16	0.94	3.46	0.21			19		112	29		19	15	19	55			30.4	652.2	22	192			502	15.7
1998	[17010] SONG SUCK HWAN (1998)	HONSHU ARC / EAST SEA (SEA OF JAPAN) BACK-ARC BASIN / KOREAN PENINSULA///	125.25	36.2	31.75	VOLCANIC ROCK	ANDESITE			MIOCENE		57.82	0.985047	34.82	42.1196	0.0373349	0.59	19.03	6.94				6.57	2.55	0.19	1.25	3.66	0.31			12		76			15	7	19	40			26	696.4	20	209			486	23.2
1998	[17010] SONG SUCK HWAN (1998)	HONSHU ARC / EAST SEA (SEA OF JAPAN) BACK-ARC BASIN / KOREAN PENINSULA///	125.25	36.2	31.75	VOLCANIC ROCK	ANDESITE			MIOCENE		59.63	0.924491	21.1538	41.0443	0.0781818	0.67	18.17	6.23				5.98	2.19	0.09	1.73	4.2	0.21														43	550	26	184			624	18.5
1998	[17010] SONG SUCK HWAN (1998)	HONSHU ARC / EAST SEA (SEA OF JAPAN) BACK-ARC BASIN / KOREAN PENINSULA///	125.25	36.2	31.75	VOLCANIC ROCK	ANDESITE			MIOCENE		59.67	0.923291	14.5071	40.9619	0.104136	0.68	18.16	6.08				6.1	2.13	0.13	1.77	4.05	0.2														42.3	406.2	28	183			594	18.5
1998	[17010] SONG SUCK HWAN (1998)	HONSHU ARC / EAST SEA (SEA OF JAPAN) BACK-ARC BASIN / KOREAN PENINSULA///	125.25	36.2	31.75	VOLCANIC ROCK	ANDESITE			MIOCENE		61.8	0.952021	16.9148	44.7521	0.0707248	0.44	18.51	5.11				5.7	2.09	0.17	1.99	4.21	0.38			5.6		36			8	2	5	60			32.3	456.7	27	189			700	22.6
1999	[9851] TAKAHASHI T. (1999)	HONSHU ARC / CENTRAL HONSHU ARC / HONSHU / IWAINE FORMATION//	137	36.8	31.55	VOLCANIC ROCK	ANDESITE			MIOCENE		56.51	0.855497	17.6538	36.385	0.0544662	1.17	18.4			7.23		7.74	2.32	0.15	1.14	3.77	0.22	0.41								5					25	459	26	152	8
1999	[9851] TAKAHASHI T. (1999)	HONSHU ARC / CENTRAL HONSHU ARC / HONSHU / IWAINE FORMATION//	137	36.8	31.55	VOLCANIC ROCK	ANDESITE			MIOCENE		56.81	0.889848	15.9667	28.7068	0.0626305	1.22	19.14			6.64		7.5	1.5	0.12	1.21	3.99	0.23	0.68								4					30	479	30	162	8
1999	[9851] TAKAHASHI T. (1999)	HONSHU ARC / CENTRAL HONSHU ARC / HONSHU / IWAINE FORMATION//	137	36.8	31.55	VOLCANIC ROCK	ANDESITE			MIOCENE		56.94	0.869583	14.4062	42.1067	0.0607375	1.19	18.22			6.96		7.51	2.84	0.12	1.15	3.68	0.22	0.43								4					28	461	32	158	10
1999	[9851] TAKAHASHI T. (1999)	HONSHU ARC / CENTRAL HONSHU ARC / HONSHU / IWAINE FORMATION//	137	36.8	31.55	VOLCANIC ROCK	ANDESITE			MIOCENE		58.26	0.882224	14.5806	42.5652	0.0730088	1.21	17.39			6.59		6.51	2.74	0.14	1.44	3.84	0.26	0.8					12			0					33	452	31	184	10		409
1999	[9851] TAKAHASHI T. (1999)	HONSHU ARC / CENTRAL HONSHU ARC / HONSHU / IWAINE FORMATION//	137	36.8	31.55	VOLCANIC ROCK	ANDESITE			MIOCENE		56.74	0.854775	17.3667	40.5529	0.074856	1.16	18.85			6.48		7.88	2.48	0.12	1.56	3.67	0.25	0.68					25			7					39	521	30	153	8		373
1999	[9851] TAKAHASHI T. (1999)	HONSHU ARC / CENTRAL HONSHU ARC / HONSHU / IWAINE FORMATION//	137	36.8	31.55	VOLCANIC ROCK	ANDESITE			MIOCENE		58.33	0.830535	13.3125	38.825	0.107981	1.43	16.14			7.92		6.23	2.82	0.15	1.79	3.75	0.31	0.64					9			4					46	426	32	184	9		482
1999	[9851] TAKAHASHI T. (1999)	HONSHU ARC / CENTRAL HONSHU ARC / HONSHU / IWAINE FORMATION//	137	36.8	31.55	VOLCANIC ROCK	ANDESITE			MIOCENE		61.17	0.972207	9.88095	29.9394	0.127711	1.11	16.14			6.34		4.22	1.52	0.08	2.17	4	0.26	2.17					8			0					53	415	42	222	11		612
1999	[9851] TAKAHASHI T. (1999)	HONSHU ARC / CENTRAL HONSHU ARC / HONSHU / IWAINE FORMATION//	137	36.8	31.55	VOLCANIC ROCK	ANDESITE			MIOCENE		59.55	0.816783	12.9394	37.6296	0.133489	1.53	15.76			7.12		5.87	2.41	0.13	2.1	3.86	0.33	0.78					20			0.7					57	427	33	214	10		491
1999	[9851] TAKAHASHI T. (1999)	HONSHU ARC / CENTRAL HONSHU ARC / HONSHU / IWAINE FORMATION//	137	36.8	31.55	VOLCANIC ROCK	ANDESITE			MIOCENE		56.89	0.812538	11.2821	41.5791	0.0681818	1.52	15.5			8.49		6.38	3.39	0.19	1.36	3.65	0.31	1.09					18			8					30	440	39	211	10		530
1999	[9851] TAKAHASHI T. (1999)	HONSHU ARC / CENTRAL HONSHU ARC / HONSHU / IWAINE FORMATION//	137	36.8	31.55	VOLCANIC ROCK	ANDESITE			MIOCENE		59.95	0.91853	13.2121	37.8275	0.0642202	1.17	16.86			6.24		5.14	2.13	0.13	1.85	4.26	0.27	1.39					3			4					28	436	33	210	10		618
2003	[5937] BANDO M. (2003)	HONSHU ARC / CENTRAL HONSHU ARC / HONSHU / TAKIDANI PLUTON//	137.67	36.33	31.55	PLUTONIC ROCK	GRANODIORITE, BIOTITE-HORNBLENDE			QUATERNARY		66.73	0.942368	21.0588	44.9495	0.273743	0.65	16.02	4.56				4.45	1.88	0.08	2.79	3.58	0.14					84	39		13	17	12	53			98	358	17	172	9		539
2017	[21884] HARTUNG E. (2017)	HONSHU ARC / CENTRAL HONSHU ARC / HONSHU / TAKIDANI PLUTON//	137.631	36.2936	31.55	PLUTONIC ROCK	GRANODIORITE			PLEISTOCENE		67.83	0.952229	15.6784	43.39	0.282051	0.54	14.97	3.85				3.6	1.49	0.08	2.93	3.65	0.16	0.31		11.1					7.1	5	15.5	32.1			88	312	19.9	150	7.9	2.6	506	23.5
2017	[21884] HARTUNG E. (2017)	HONSHU ARC / CENTRAL HONSHU ARC / HONSHU / TAKIDANI PLUTON//	137.627	36.2928	31.55	PLUTONIC ROCK	GRANODIORITE			PLEISTOCENE		66.76	0.928602	15.1546	44.7187	0.336735	0.57	15.13	4.26				3.88	1.74	0.09	3.11	3.57	0.16	0.29		13					8.6	4.8	7.4	50.8			99	294	19.4	139	8.8	4.9	418	31.6
2017	[21884] HARTUNG E. (2017)	HONSHU ARC / CENTRAL HONSHU ARC / HONSHU / TAKIDANI PLUTON//	137.614	36.3001	31.55	PLUTONIC ROCK	GRANITE, HORNBLENDE-BIOTITE			PLEISTOCENE		66.54	0.926559	18.5632	44.7717	0.312693	0.55	15.27	3.86				3.99	1.58	0.09	3.25	3.47	0.15	0.63		11.5					8.5	5.9	5.9	44.5			101	323	17.4	151	7.2	1.7	570	26.9
2017	[21884] HARTUNG E. (2017)	HONSHU ARC / CENTRAL HONSHU ARC / HONSHU / TAKIDANI PLUTON//	137.615	36.2998	31.55	PLUTONIC ROCK	GRANITE, HORNBLENDE-BIOTITE			PLEISTOCENE		67.24	0.928068	13.0556	44.1424	0.375887	0.58	14.82	4.11				3.7	1.64	0.08	3.31	3.44	0.15	0.26		12.7					8.1	5.3	8.2	40.8			106	282	21.6	169	8.5	3.9	507	30.8
2017	[21884] HARTUNG E. (2017)	HONSHU ARC / CENTRAL HONSHU ARC / HONSHU / TAKIDANI PLUTON//	137.626	36.2931	31.55	PLUTONIC ROCK	GRANODIORITE, HORNBLENDE-BIOTITE			PLEISTOCENE		65.59	0.916552	18.0328	44.8807	0.266667	0.63	15.28	4.67				4.34	1.92	0.09	2.96	3.39	0.18	0.31		13.4					9.7	6	9.9	48.7			88	330	18.3	157	7.7	2.8	480	25
2017	[21884] HARTUNG E. (2017)	HONSHU ARC / CENTRAL HONSHU ARC / HONSHU / TAKIDANI PLUTON//	137.63	36.2907	31.55	PLUTONIC ROCK	GRANODIORITE			PLEISTOCENE		67.68	0.948766	16.6851	42.117	0.31457	0.55	14.64	4.11				3.47	1.51	0.08	3.26	3.4	0.16	0.37		11.2					7.8	4.4	4.7	35.1			95	302	18.1	149	8	2.6	546	37.5
2017	[21884] HARTUNG E. (2017)	HONSHU ARC / CENTRAL HONSHU ARC / HONSHU / TAKIDANI PLUTON//	137.63	36.2901	31.55	PLUTONIC ROCK	GRANODIORITE			PLEISTOCENE		67.41	0.940366	16.6138	42.5785	0.299363	0.59	14.88	4.22				3.6	1.58	0.08	3.04	3.64	0.17	0.27		11.3					7.7	3.8	3	40.8			94	314	18.9	153	8.7	3.3	533	28.5
2017	[21884] HARTUNG E. (2017)	HONSHU ARC / CENTRAL HONSHU ARC / HONSHU / TAKIDANI PLUTON//	137.629	36.2918	31.55	PLUTONIC ROCK	NOT GIVEN			PLEISTOCENE		67.38	0.963371	16	44.5994	0.371528	0.54	14.95	4.01				3.79	1.63	0.06	3.29	3.08	0.15	0.41		11.6					8	4.7	28.8	29.2			107	288	18	137	8.1	4.8	445	29.3
2017	[21884] HARTUNG E. (2017)	HONSHU ARC / CENTRAL HONSHU ARC / HONSHU / TAKIDANI PLUTON//	137.629	36.2921	31.55	PLUTONIC ROCK	NOT GIVEN			PLEISTOCENE		67.03	0.946512	16.3128	44.0795	0.356164	0.54	14.84	4.02				3.67	1.6	0.06	3.29	3.31	0.15	0.5		11.8					7.3	5.4	8	28			104	292	17.9	139	8.1	4	491	27.2
1995	[3574] KANEKO T. (1995)	HONSHU ARC / CENTRAL HONSHU ARC / HONSHU / TATEYAMA//	137.633	36.5667	31.55	VOLCANIC ROCK	DACITE			QUATERNARY		63.76	0.954869	15.3571	38.5605	0.181395	0.79	16.49			4.97		4.6	1.75	0.13	2.62	3.69	0.29			15		76	2			2.9	9	64	19		78	430	28	203	8.7		558
1995	[3574] KANEKO T. (1995)	HONSHU ARC / CENTRAL HONSHU ARC / HONSHU / TATEYAMA//	137.633	36.5667	31.55	VOLCANIC ROCK	DACITE, AUGITE-HYPERSTHENE			QUATERNARY		62.08	0.943573	18.8636	41.7025	0.183133	0.76	16.6			6.03		5.23	2.42	0.12	2.59	3.21	0.28			18		119	9			4	16	56	18		76	415	22	146	7.1		470
1995	[3574] KANEKO T. (1995)	HONSHU ARC / CENTRAL HONSHU ARC / HONSHU / TATEYAMA//	137.633	36.5667	31.55	VOLCANIC ROCK	ANDESITE, AUGITE-HYPERSTHENE			QUATERNARY		61.66	0.901475	17.2963	42.1265	0.149893	0.81	16.81			5.73		5.7	2.34	0.12	2.41	3.45	0.3			14		106	4			5.3	12	61	18		70	467	27	163	6.5		473
1995	[3574] KANEKO T. (1995)	HONSHU ARC / CENTRAL HONSHU ARC / HONSHU / YAKEDAKE/YAKEYAMA/	137.6	36.2167	31.55	VOLCANIC ROCK	DACITE, BIOTITE-HYPERSTHENE-AUGITE-HORNBLENDE			QUATERNARY		63.23	0.910729	21.45	43.9381	0.200466	0.76	16.2			5.39		5.25	2.37	0.11	2.6	3.3	0.22			13		108	9			6.3	10	55	17		86	429	20	137	7.2		449
1995	[5513] KANEKO T. (1995)	HONSHU ARC / CENTRAL HONSHU ARC / HONSHU / AZUMAYA//	138.341	36.5167	29.78	VOLCANIC ROCK	ANDESITE, AUGITE-HYPERSTHENE			QUATERNARY		58.88	0.91206	17.2803	39.1433	0.0707022	0.89	18.47			6.54		7.41	2.36	0.11	1.46	3.16	0.24			19.7		162.3	14.2			9	65.1	78.8	20.4		29.2	413	23.9	102.1	5.2		449.8
1995	[5513] KANEKO T. (1995)	HONSHU ARC / CENTRAL HONSHU ARC / HONSHU / AZUMAYA//	138.343	36.5361	29.78	VOLCANIC ROCK	DACITE, HYPERSTHENE-AUGITE			QUATERNARY		67.25	0.954582	9.10968	31.3215	0.241501	0.72	15.04			4.69		4.01	1.2	0.07	2.79	3.31	0.19			14.6		80.6	3.1			2.8	28.1	57.6	16.7		68.2	282.4	31	172.6	6		691.5
1995	[5513] KANEKO T. (1995)	HONSHU ARC / CENTRAL HONSHU ARC / HONSHU / KAYANOTAIRA//	138.339	36.8153	29.78	VOLCANIC ROCK	ANDESITE, HYPERSTHENE-AUGITE			QUATERNARY		58.4	0.894228	9.05397	44.6425	0.12798	0.75	16.25			8.62		6.84	3.9	0.15	1.5	2.5	0.16			23.6		202.9	22.1			13.4	87.6	82.5	17.4		36.5	285.2	31.5	87.8	3.9		457.1
1995	[5513] KANEKO T. (1995)	HONSHU ARC / CENTRAL HONSHU ARC / HONSHU / NAEBA//	138.609	36.9344	29.78	VOLCANIC ROCK	ANDESITE, HYPERSTHENE-AUGITE			QUATERNARY		61.91	0.959468	8.9387	44.9756	0.22889	0.65	15.94			7		5.7	3.21	0.13	1.99	2.49	0.12			19.2		150.3	19.1			8.6	76.5	60.9	16.5		53.4	233.3	26.1	132.1	4.6		568.3
1995	[5513] KANEKO T. (1995)	HONSHU ARC / CENTRAL HONSHU ARC / HONSHU / NAEBA//	138.682	36.8433	29.78	VOLCANIC ROCK	ANDESITE, HYPERSTHENE-AUGITE			QUATERNARY		61.55	0.942361	8.61921	38.358	0.151364	0.66	16.8			6.76		6.35	2.36	0.12	1.64	2.74	0.16			22.9		132	7.2			6	74.2	70.4	18		39.4	260.3	30.2	114.4	2.6		568.6
1995	[5513] KANEKO T. (1995)	HONSHU ARC / CENTRAL HONSHU ARC / HONSHU / SEKITA//	138.341	36.9772	29.78	VOLCANIC ROCK	ANDESITE, AUGITE-HYPERSTHENE			QUATERNARY		57.29	0.902341	11.0154	34.3808	0.0344634	0.76	19.25			6.94		8.44	2.04	0.16	0.73	3.16	0.27			26.6		101.2	2.4			2.8	37.7	76.5	19.1		12.3	356.9	32.4	67.7	4.2		383.1
1995	[5513] KANEKO T. (1995)	HONSHU ARC / CENTRAL HONSHU ARC / HONSHU / TAKAYASHIRO//	138.404	36.7961	29.78	VOLCANIC ROCK	ANDESITE, AUGITE-HYPERSTHENE			QUATERNARY		60.75	0.997438	14.0711	41.4719	0.090019	0.56	17.8			6.49		6.3	2.58	0.15	1.3	3.03	0.17			17.6		107.9	12.2			7.3	29.2	66.4	16.7		28.5	316.6	22.5	75.2	3.6		523.6
2007	[13137] IGARASHI S. (2007)	HONSHU ARC / CENTRAL HONSHU ARC / HONSHU / TORIKABUTO / ONEYAMA LAVA/	138.609	36.8506	29.78	VOLCANIC ROCK	ANDESITE			PLEISTOCENE		57.15	0.886572	12.123	41.3143	0.0780933	0.76	16.68	9.79				7	3.48	0.18	1.11	2.97	0.16					254.5	2.4		28.3	5.6	29.3	88.2			23.1	295.8	24.4	65.7	2		433.1	5.92
2007	[13137] IGARASHI S. (2007)	HONSHU ARC / CENTRAL HONSHU ARC / HONSHU / TORIKABUTO / ONEYAMA LAVA/	138.597	36.8411	29.78	VOLCANIC ROCK	DACITE			PLEISTOCENE		63.36	0.928965	8.04893	41.2368	0.159574	0.55	16.03	6.35				5.71	2.25	0.09	1.67	3.08	0.14					157.9	8.3		21.2	9.4	24.6	81.8			42	263.2	32.7	88.3	2.9		534.4	9.71
2007	[13137] IGARASHI S. (2007)	HONSHU ARC / CENTRAL HONSHU ARC / HONSHU / TORIKABUTO / ONIZAWA-TAKAYAMAZAWA PYROCLASTIC ROCK/	138.582	36.8158	29.78	VOLCANIC ROCK	ANDESITE			PLEISTOCENE		61.96	0.891179	9.90975	42.7365	0.129326	0.58	16.18	6.82				6.05	2.57	0.14	1.52	3.35	0.14					157.1	4.9		19.4	4.5	30.3	75			35.5	274.5	27.7	93.3	2.5		544	8.33
2007	[13137] IGARASHI S. (2007)	HONSHU ARC / CENTRAL HONSHU ARC / HONSHU / TORIKABUTO / ONIZAWA-TAKAYAMAZAWA PYROCLASTIC ROCK/	138.604	36.8547	29.78	VOLCANIC ROCK	DACITE			PLEISTOCENE		66.84	0.93725	7.85911	41.3297	0.270223	0.44	15.36	4.92				4.6	1.75	0.12	2.11	3.49	0.12					98.7	0		15.8	1.1	9.4	57.2			61.8	228.7	29.1	96.1	0.4		641.6	9.49
2007	[13137] IGARASHI S. (2007)	HONSHU ARC / CENTRAL HONSHU ARC / HONSHU / TORIKABUTO / ONIZAWA-TAKAYAMAZAWA PYROCLASTIC ROCK/	138.617	36.8494	29.78	VOLCANIC ROCK	DACITE			PLEISTOCENE		63.02	0.915983	7.82746	42.5427	0.262708	0.57	16.04	6.58				5.64	2.46	0.12	2.13	3.01	0.11					151.4	17.9		20.2	9.8	62	71			58.4	222.3	28.4	108.7	3.7		521.9	9.2
2007	[13137] IGARASHI S. (2007)	HONSHU ARC / CENTRAL HONSHU ARC / HONSHU / TORIKABUTO / TORIKABUTO-SANCHO LAVA/	138.587	36.8361	29.78	VOLCANIC ROCK	ANDESITE			PLEISTOCENE		59.91	0.860769	10.0547	42.3231	0.109982	0.63	16.66	7.8				6.95	2.89	0.15	1.42	3.15	0.16					188.9	3.6		22.2	6.2	45.6	74.6			30.3	275.5	27.4	81.3	2.9		504.7	8.3
2007	[13137] IGARASHI S. (2007)	HONSHU ARC / CENTRAL HONSHU ARC / HONSHU / TORIKABUTO / TORIKABUTO-SANCHO LAVA/	138.587	36.8361	29.78	PLUTONIC ROCK	GABBRO			PLEISTOCENE		57.98	0.881552	10.8902	42.6442	0.0478934	0.73	16.8	9.03				7.15	3.39	0.18	0.87	3.11	0.18					229.3	1.8		26.5	5.9	45	92.5			13.3	277.7	25.5	74.3	2.5		449	7.54
1995	[5513] KANEKO T. (1995)	HONSHU ARC / CENTRAL HONSHU ARC / HONSHU / TORIKABUTO//	138.606	36.8144	29.78	VOLCANIC ROCK	DACITE, AUGITE-HYPERSTHENE			QUATERNARY		63.14	0.915099	9.30175	42.6251	0.121086	0.58	16.11			6.19		5.94	2.58	0.12	1.53	3.13	0.14			18.9		128.5	10.7			5.1	35.2	63.1	16.2		32.1	265.1	28.5	102.7	4.6		550.1
2007	[13137] IGARASHI S. (2007)	HONSHU ARC / CENTRAL HONSHU ARC / HONSHU / TORIKABUTO//	138.855	36.8547	29.78	VOLCANIC ROCK	ANDESITE			PLEISTOCENE		61.98	0.878212	8.27246	43.7585	0.147162	0.57	16.17	7				6.33	2.75	0.14	1.53	3.19	0.14					175	9.9		22.3	5.1	27.4	64.8			42	285.4	34.5	88.8	0.9		512.8	8.86
2007	[13137] IGARASHI S. (2007)	HONSHU ARC / CENTRAL HONSHU ARC / HONSHU / TORIKABUTO//	138.6	36.8167	29.78	VOLCANIC ROCK	DACITE			PLEISTOCENE		65.48	0.9091	9.62917	40.7194	0.211597	0.51	15.23	5.68				4.86	1.97	0.14	2.01	3.49	0.13					124.7	0		16.1	5.2	23.9	65.6			48.9	231.1	24	96.8	3		630	7.65
2007	[13137] IGARASHI S. (2007)	HONSHU ARC / CENTRAL HONSHU ARC / HONSHU / TORIKABUTO//	138.616	36.8494	29.78	VOLCANIC ROCK	ANDESITE			PLEISTOCENE		62.09	0.910454	6.03876	42.4121	0.226359	0.61	16.18	7.18				5.92	2.67	0.11	1.9	3.01	0.12					170	14.3		21.5	12.1	92.7	77.4			52.9	233.7	38.7	104.6	3.7		467.5
2007	[13137] IGARASHI S. (2007)	HONSHU ARC / CENTRAL HONSHU ARC / HONSHU / TORIKABUTO//	138.613	36.8494	29.78	VOLCANIC ROCK	ANDESITE, BASALTIC			PLEISTOCENE		56.54	0.918218	12.0705	42.2264	0.0788321	0.74	17.05	10.08				7.06	3.72	0.19	0.98	2.84	0.15					260.3	2.4		29.3	4.3	50	87.8			21.6	274	22.7	58.4	2		358
2007	[13137] IGARASHI S. (2007)	HONSHU ARC / CENTRAL HONSHU ARC / HONSHU / TORIKABUTO//	138.606	36.8153	29.78	VOLCANIC ROCK	ANDESITE			PLEISTOCENE		62.05	0.89248	9.11864	41.7512	0.124164	0.57	16.08	6.88				5.95	2.49	0.14	1.56	3.35	0.14					161.2	5.5		19.4	4.5	38.7	72.2			33.4	269	29.5	92	2.4		548.1	9.15
2007	[13137] IGARASHI S. (2007)	HONSHU ARC / CENTRAL HONSHU ARC / HONSHU / TORIKABUTO//	138.607	36.8314	29.78	VOLCANIC ROCK	ANDESITE			PLEISTOCENE		62.45	0.910852	9.50714	41.1111	0.145379	0.55	16.15	6.61				5.76	2.33	0.14	1.66	3.32	0.14					145.7	4.5		19.6	7.8	33.2	72.1			38.7	266.2	28	89.6	2.4		552.5	7.8
2007	[13137] IGARASHI S. (2007)	HONSHU ARC / CENTRAL HONSHU ARC / HONSHU / TORIKABUTO//	138.59	36.8367	29.78	VOLCANIC ROCK	ANDESITE			PLEISTOCENE		58.54	0.863921	9.04667	41.6312	0.115328	0.7	16.62	8.83				7.09	3.18	0.15	1.32	2.99	0.15					231.3	5.8		25.9	4.7	63.1	81.1			31.3	271.4	30	72.8	3.1		471.1	8.68
2007	[13137] IGARASHI S. (2007)	HONSHU ARC / CENTRAL HONSHU ARC / HONSHU / TORIKABUTO//	138.605	36.8539	29.78	VOLCANIC ROCK	DACITE			PLEISTOCENE		63.15	0.92007	7.60234	42.2584	0.171154	0.55	16.09	6.63				5.68	2.45	0.14	1.57	3.32	0.14					159.4	1.1		21	0.7	17.8	67.1			44.5	260	34.2	96.4	1		566.5
2007	[13137] IGARASHI S. (2007)	HONSHU ARC / CENTRAL HONSHU ARC / HONSHU / TORIKABUTO//	138.605	36.8539	29.78	VOLCANIC ROCK	DACITE			PLEISTOCENE		66.49	0.956186	7.71525	41.5527	0.281634	0.46	15.53	5.07				4.51	1.82	0.12	2.08	3.52	0.09					97.8	0		16.4	2.2	14.2	57.2			64.1	227.6	29.5	99.2	0.6		623.8
2007	[13137] IGARASHI S. (2007)	HONSHU ARC / CENTRAL HONSHU ARC / HONSHU / TORIKABUTO//	138.606	36.8153	29.78	PLUTONIC ROCK	GABBRO			PLEISTOCENE		56.72	0.881497	6.32536	44.8618	0.116112	0.79	16.76	9.98				7.63	4.1	0.18	0.95	2.5	0.15					305.2	33.6		33.1	13.3	58.7	81.8			30.7	264.4	41.8	72.4	0.5		313.5	9.1
2007	[13137] IGARASHI S. (2007)	HONSHU ARC / CENTRAL HONSHU ARC / HONSHU / TORIKABUTO//	138.589	36.9011	29.78	PLUTONIC ROCK	GABBRO			PLEISTOCENE		60.92	0.900188	9.37117	39.3808	0.0458265	0.68	16.49	7.53				6.39	2.47	0.23	0.78	3.56	0.18					100	0		19.9	4.7	11.1	80.2			14	305.5	32.6	87.9	2.1		430.1
1995	[5513] KANEKO T. (1995)	HONSHU ARC / CENTRAL HONSHU ARC / HONSHU / YAKEBITAI//	138.479	36.79	29.78	VOLCANIC ROCK	ANDESITE, AUGITE-HYPERSTHENE			QUATERNARY		58.27	0.89917	11.9315	44.348	0.0733356	0.73	17.33			8.03		7.37	3.59	0.15	1.08	2.86	0.18			23		176.8	16			12.2	48.2	82.2	17		21.7	295.9	24.8	86.7	3.4		426.5
2001	[4697] KOBAYASHI K. (2001)	HONSHU ARC / NORTHEASTERN HONSHU ARC / HONSHU / AKAGI//	139.2	36.55	30.95	VOLCANIC ROCK	ANDESITE			QUATERNARY		58.5	0.956113	20.828	42.3059	0.0825688	0.67	18.8		3.34	6.636	3.63	7.37	2.73	0.14	1.06	3.11	0.11														27	327	15.7	81.4	3.03	1.33	227	9.89
2001	[4697] KOBAYASHI K. (2001)	HONSHU ARC / NORTHEASTERN HONSHU ARC / HONSHU / AKAGI//	139.2	36.55	30.95	VOLCANIC ROCK	ANDESITE			QUATERNARY		56.3	0.978788	22.5949	44.3907	0.0498599	0.66	19.1		3.38	6.922	3.88	7.87	3.1	0.14	0.66	2.73	0.13														17.8	357	15.8	63.1	2.18	0.892	185	7.57
2001	[4697] KOBAYASHI K. (2001)	HONSHU ARC / NORTHEASTERN HONSHU ARC / HONSHU / AKAGI//	139.2	36.55	30.95	VOLCANIC ROCK	ANDESITE			QUATERNARY		57.1	0.956515	15.9916	41.6398	0.0641161	0.79	19.2		2.7	6.82	4.39	7.67	2.73	0.13	0.95	3.1	0.18														24.3	379	23.7	107.7	4.04	0.539	280	12.83
2001	[4697] KOBAYASHI K. (2001)	HONSHU ARC / NORTHEASTERN HONSHU ARC / HONSHU / AKAGI//	139.2	36.55	30.95	VOLCANIC ROCK	ANDESITE			QUATERNARY		57.9	0.939213	23.7297	39.3508	0.0460137	0.65	19.9		2.56	5.824	3.52	8.24	2.12	0.12	0.81	3.24	0.19														20.2	439	18.5	98.3	3.75	0.792	286	13.1
2001	[4697] KOBAYASHI K. (2001)	HONSHU ARC / NORTHEASTERN HONSHU ARC / HONSHU / AKAGI//	139.2	36.55	30.95	VOLCANIC ROCK	ANDESITE			QUATERNARY		58.2	0.960665	22.7083	38.2814	0.0529817	0.64	19.9		2.25	5.575	3.55	7.95	1.94	0.11	0.86	3.24	0.2														23.1	436	19.2	92.3	3.5	0.713	280	11.99
2001	[4697] KOBAYASHI K. (2001)	HONSHU ARC / NORTHEASTERN HONSHU ARC / HONSHU / AKAGI//	139.2	36.55	30.95	VOLCANIC ROCK	ANDESITE			QUATERNARY		62.1	0.983375	22.0213	37.6031	0.0804348	0.49	16.2		2.76	4.614	2.13	5.58	1.56	0.11	1.09	3.13	0.15														33.3	414	18.8	82.1	4.43	0.802	393	16.9
2001	[4697] KOBAYASHI K. (2001)	HONSHU ARC / NORTHEASTERN HONSHU ARC / HONSHU / AKAGI//	139.2	36.55	30.95	VOLCANIC ROCK	NOT GIVEN			QUATERNARY		60.5	0.952787	21.4535	43.3348	0.0837398	0.56	17.8		3.23	5.687	2.78	6.84	2.44	0.12	1.12	3.06	0.14														30.9	369	17.2	93.1	3.66	1.68	422	13.6
2011	[14967] BOODEN M. A. (2011)	NEW ZEALAND / NORTH ISLAND / NORTHLAND VOLCANIC ZONE / KAIPARA-TOKATOKA//	174.55	-36.42	27.07	VOLCANIC ROCK	DACITE			MIOCENE		65.4253	0.980804	23.1465	35.3484	0.19063	0.392552	17.4534		1.13883	3.87203	2.84708	4.53951	1.18772	0.0805234	2.78812	3.96578	0.191243	0.858802			5.8585		80.3388	12.2242		56.4317	5.10311	21.2393	39.3239	17.1981		71.6652	375.938	16.2417	187.478	8.59618	1.43066	1459.82
2011	[14967] BOODEN M. A. (2011)	NEW ZEALAND / NORTH ISLAND / NORTHLAND VOLCANIC ZONE / MANUKAU//	174.8	-36.97	27.07	VOLCANIC ROCK	ANDESITE			MIOCENE		63.4462	0.903463	4.7388	24.1978	0.395044	0.906375	15.9562		1.9465	6.6181	4.86625	4.15339	1.18526	0.129482	2.6494	4.40239	0.348606	0.269312			22.2517		66.022	6.91893		20.3043	4.41411	16.9783	73.1341	17.7498		78.5031	198.72	41.9346	239.313	7.22912	3.23431	442.465
2011	[14967] BOODEN M. A. (2011)	NEW ZEALAND / NORTH ISLAND / NORTHLAND VOLCANIC ZONE / MANUKAU//	174.8	-36.97	27.07	VOLCANIC ROCK	DACITE			MIOCENE		66.717	0.938588	3.93537	7.18405	0.258442	0.865017	16.6063		1.15815	3.9377	2.89536	3.47013	0.170992	0.0402334	2.32348	5.39127	0.341984	0.221186			19.6156		59.9382	6.29723		11.6745	4.06983	181.588	81.5824	19.5992		48.665	188.302	47.8485	188.559	4.6223	1.27905	450.095
2010	[14571] BOODEN M. A. (2010)	NEW ZEALAND / NORTH ISLAND / NORTHLAND VOLCANIC ZONE / KIWITAHI VOLCANIC CHAIN - NESS VALLEY//	175.2	-37	25.78	VOLCANIC ROCK	ANDESITE	10000000	15000000	MIOCENE		58.51	0.911812	9.77578	40.605	0.151376	0.77	17.76		2.1	7.9	6.01	6.93	3.03	0.13	1.02	3.51	0.13				20.4		167	13		28.2	17.7	50.1	112	23		33	218	22.3	108	3.4	0.59	173
2010	[14571] BOODEN M. A. (2010)	NEW ZEALAND / NORTH ISLAND / NORTHLAND VOLCANIC ZONE / KIWITAHI VOLCANIC CHAIN - NESS VALLEY//	175.2	-37	25.78	VOLCANIC ROCK	ANDESITE	10000000	15000000	MIOCENE		58.6	0.935913	9.72112	44.3522	0.139344	0.84	16.89		2.27	8.543	6.5	6.52	3.82	0.16	1.04	3.08	0.15				24.1		175	33		26.6	12.4	40.6	81	23		34	244	25.1	111	4.4	0.83	208
1999	[13905] HOERNLE K. A. (1999)	BETIC-RIF OROGENIC BELT (GIBRALTAR ARC) / ALBORAN SEA BASIN / SITE 978///	-2.0571	36.2311	18.45	VOLCANIC ROCK	ANDESITE			MIOCENE		59.46	0.867249	23.6232	32.5601	0.276074	0.53	17.06			6.35		6.72	1.72	0.04	2.57	2.84	0.264					163	0		13	3	26	57	16		90	326	13.8	100	6.92		717	23.6
2004	[7847] DUGGEN S. (2004)	BETIC-RIF OROGENIC BELT (GIBRALTAR ARC) / BETIC CORDILLERA / NEOGENE ALBORAN VOLCANIC PROVINCE///	-2.061	36.7968	18.45	VOLCANIC ROCK	ANDESITE			NEOGENE		57	0.905247	16.4091	40.5468	0.141274	0.77	17.5			7.71		7.72	2.95	0.16	1.23	2.41	0.2						18		25	0		84	17		51	361	22	85			360
2012	[16230] SORIANO C. (2012)	BETIC-RIF OROGENIC BELT (GIBRALTAR ARC) / BETIC CORDILLERA / NEOGENE ALBORAN VOLCANIC PROVINCE///	-2.075	36.7742	18.45	VOLCANIC ROCK	DACITE			MIOCENE		62.84	0.817284	14.3158	41.8645	0.125525	0.805722	15.181		5.91	5.319		7.01567	2.38769	0.147388	1.24	2.72177	0.186692	1.53		27.1		126.2	0			10.8					47.8	380.8	26.6	87.5	1.5		361.1	10.4
2007	[15108] FRANCALANCI L. (2007)	AEGEAN ARC / SOUTH AEGEAN VOLCANIC ARC / KIMOLOS / KIMOLOS//	24.57	36.79	28.88	VOLCANIC ROCK	NOT GIVEN			PLIOCENE		58.01	0.843483	12.3	25.4338	0.254743	1.11	18.99		4.63	5.487	1.32	7.54	1.05	0.11	2.77	3.53	0.18	0.77				187	20		13	9	33	72			94	369	30	226	9		676	30
2007	[15108] FRANCALANCI L. (2007)	AEGEAN ARC / SOUTH AEGEAN VOLCANIC ARC / KIMOLOS / KIMOLOS//	24.57	36.79	28.88	VOLCANIC ROCK	NOT GIVEN			PLIOCENE		58.28	0.828676	12.6207	28.0751	0.259563	1.11	18.77		4.33	5.297	1.4	7.6	1.16	0.08	2.75	3.56	0.2	0.76		15		181	22		11	8	35	72			95	366	29	228	9		632	26
2012	[15753] KIRCHENBAUR M.(2012) [GeoReM [6952] ]	AEGEAN ARC / SOUTH AEGEAN VOLCANIC ARC / SANTORINI / MEGALO VOUNO//	25.4069	36.466	17.63	VOLCANIC ROCK	NOT GIVEN			QUATERNARY		56.5	0.779396	7.74908	32.9411	0.295238	0.88	17.3		8.55	15.385	7.69	8.45	4.24	0.16	1.45	3.2	0.114	-0.17	13.2	35.5		286	15.3		29.9	16.3	50.7	75.4	18.5		62	210	27.1	141	5.27	1.83	209	14.8
2012	[15753] KIRCHENBAUR M.(2012) [GeoReM [6952] ]	AEGEAN ARC / SOUTH AEGEAN VOLCANIC ARC / SANTORINI / SKAROS//	25.4191	36.4323	17.63	VOLCANIC ROCK	NOT GIVEN			QUATERNARY		56.8	0.76568	5.10695	28.6446	0.305759	1.25	16.1		9.77	17.583	8.79	7.49	3.96	0.2	1.45	3.55	0.181	-0.2	13.8	39		280	100		27	23.1	74.8	95.6	18.8		58.4	191	37.4	193	5.99	1.86	230	17.1
2006	[9217] VESPA M. (2006)	AEGEAN ARC / SOUTH AEGEAN VOLCANIC ARC / SANTORINI///	25.4	36.45	17.63	VOLCANIC ROCK	ANDESITE, BASALTIC	3600	145000	QUATERNARY		56.32	0.828623	5.04878	35.297	0.217391	1.32	17.03	10.02				7.33	2.76	0.18	1.28	3.55	0.21					264	0			3					45	207	41	173			201
2006	[9217] VESPA M. (2006)	AEGEAN ARC / SOUTH AEGEAN VOLCANIC ARC / SANTORINI///	25.4	36.45	17.63	VOLCANIC ROCK	ANDESITE	3600	145000	QUATERNARY		57.77	0.802404	9.04762	35.6721	0.194737	1.26	16.09	9.75				6.48	2.73	0.19	1.41	4.1	0.21					179	4			0					37	190	21	164	6.16	1.69	256	17.4
2008	[12644] PE-PIPER G. (2008)	AEGEAN ARC / EASTERN AEGEAN VOLCANIC ARC / KOS///	26.9893	36.7602	19.22	VOLCANIC ROCK	ANDESITE			PLEISTOCENE		61.18	0.877815	37.08	27.1506	0.0614887	0.55	18.37	4.57				5.33	0.86	0.08	2.63	5.1	0.31	0.54		4		70	0		5	10	20	89	18		57	927	25	205	17	1.4	1150	48
1992	[7989] SEYMOUR K. ST. (1992)	AEGEAN ARC / SOUTH AEGEAN VOLCANIC ARC / NISYROS / NISYROS//	27.1667	36.5833	20.85	VOLCANIC ROCK	NOT GIVEN			QUATERNARY		57.87	0.876347	12.3793	40.4856	0.133705	1.07	17.44		7.52			6.37	2.87	0.12	1.85	3.84	0.26					176	23			18					48	359	29	178	17		366
1992	[7989] SEYMOUR K. ST. (1992)	AEGEAN ARC / SOUTH AEGEAN VOLCANIC ARC / NISYROS / NISYROS//	27.1667	36.5833	20.85	VOLCANIC ROCK	DACITE			QUATERNARY		66.82	0.927326	14.4211	39.0188	0.310219	0.53	15.43		3.9			3.47	1.4	0.08	3.1	4.24	0.15					66	18			13					85	274	19	184	20		576
2019	[22981] PIPER D. J. W. (2019)	AEGEAN ARC / SOUTH AEGEAN VOLCANIC ARC / PYRGOUSA / PYRGOUSA//	27	36.5	20.85	VOLCANIC ROCK	ANDESITE			PLIOCENE		61.44	0.9299	33.3173	41.1198	0.0851371	0.77	17.96	5.53				5.56	1.95	0.09	2.41	4.01	0.2	1.42		15		142			13	7	37	44	18		59	693	20.8	156	12.9	1.1	781	36.2
2004	[7847] DUGGEN S. (2004)	BETIC-RIF OROGENIC BELT (GIBRALTAR ARC) / BETIC CORDILLERA / NEOGENE ALBORAN VOLCANIC PROVINCE///	-4.6545	36.5248	22.26	VOLCANIC ROCK	ANDESITE			NEOGENE		58.5	0.913344	11.7692	33.6056	0.137255	1.39	16			8.17		5.59	2.32	0.12	1.05	3.78	0.27						0		24	13		38	20		42	306	26	116			199
2004	[7847] DUGGEN S. (2004)	BETIC-RIF OROGENIC BELT (GIBRALTAR ARC) / BETIC CORDILLERA / NEOGENE ALBORAN VOLCANIC PROVINCE///	-4.6545	36.5248	22.26	VOLCANIC ROCK	ANDESITE			NEOGENE		59.5	0.960351	11.1034	32.7201	0.149068	1.25	15.8			7.77		4.83	2.12	0.11	1.19	3.88	0.25						0		24	5		36	19		48	322	29	120			203
2004	[7847] DUGGEN S. (2004)	BETIC-RIF OROGENIC BELT (GIBRALTAR ARC) / BETIC CORDILLERA / NEOGENE ALBORAN VOLCANIC PROVINCE///	-4.6545	36.5248	22.26	VOLCANIC ROCK	ANDESITE			NEOGENE		60.3	0.910795	8.25926	32.4941	0.390135	1.15	15.5			7.48		5.33	2.02	0.14	1.42	3.52	0.2						24		21	0		73	17		87	223	27	124			149
2004	[7847] DUGGEN S. (2004)	BETIC-RIF OROGENIC BELT (GIBRALTAR ARC) / BETIC CORDILLERA / NEOGENE ALBORAN VOLCANIC PROVINCE///	-4.6545	36.5248	22.26	VOLCANIC ROCK	ANDESITE			NEOGENE		61.3	0.928921	9.48387	30.2863	0.173469	1.48	15.5			7.18		5.62	1.75	0.16	1.31	3.07	0.29						0		19	6		97	17		51	294	31	161			524
2021	[25176] AZIZI H. (2021)	ANATOLIA-IRAN BELT - CENOZOIC/QUATERNARY / IRAN / SANANDAJ-SIRJAN ARC//	47.1084	36.7034	43.19	VOLCANIC ROCK	ANDESITE			MIOCENE		58.373	0.809132	7.71291	38.7485	0.360068	0.711	15.929	6.662				6.676	2.128	0.089	2.36	3.036	0.126	1.9041	25.2086	17.3569		133.12	13.8287		11.5365	3.11215	14.4636	59.0823	16.7241		72.5643	201.53	26.1289	112.277	5.65238	5.79236	374.713	19.8861
2021	[25176] AZIZI H. (2021)	ANATOLIA-IRAN BELT - CENOZOIC/QUATERNARY / IRAN / SANANDAJ-SIRJAN ARC//	47.0834	36.7898	43.19	VOLCANIC ROCK	ANDESITE			MIOCENE		57.316	0.777723	8.94608	28.4123	0.300668	0.731	16.907	6.512				7.668	1.305	0.105	2.318	3.215	0.153	4.43719	24.0273	15.7411		122.291	7.76917		9.16486	1.62976	2.80611	41.6108	17.4305		65.0414	216.323	24.1808	132.988	7.50375	1.31095	430.94	20.6803
2021	[25176] AZIZI H. (2021)	ANATOLIA-IRAN BELT - CENOZOIC/QUATERNARY / IRAN / SANANDAJ-SIRJAN ARC//	47.0759	36.7899	43.19	VOLCANIC ROCK	ANDESITE			MIOCENE		58.065	0.77895	8.78204	25.5445	0.298347	0.72	16.768	6.321				7.813	1.095	0.15	2.188	3.011	0.154	4.25334	18.4336	15.3358		117.227	8.76828		8.87662	1.60202	3.9007	63.1036	17.5985		65.4738	219.455	24.9891	143.728	10.4277	1.84402	491.411	21.4795
2021	[25176] AZIZI H. (2021)	ANATOLIA-IRAN BELT - CENOZOIC/QUATERNARY / IRAN / SANANDAJ-SIRJAN ARC//	47.0837	36.7887	43.19	VOLCANIC ROCK	ANDESITE			MIOCENE		57.289	0.958204	8.59705	42.5035	0.328202	0.754	17.006	6.971				5.678	2.602	0.083	2.306	2.996	0.151	3.43834	33.3005	16.3621		129.128	9.9506		9.80643	1.47077	3.16296	85.7349	17.825		66.8638	203.728	23.6974	139.615	8.95315	2.18681	436.979	20.1415
2021	[25176] AZIZI H. (2021)	ANATOLIA-IRAN BELT - CENOZOIC/QUATERNARY / IRAN / SANANDAJ-SIRJAN ARC//	47.2837	36.5874	43.19	VOLCANIC ROCK	ANDESITE			MIOCENE		59.613	0.958208	10.0915	34.8696	0.174718	0.858	18.097	6.1				6.383	1.649	0.083	1.666	3.33	0.179	2.63283	5.97681	18.8251		133.463	5.15245		9.84396	1.42292	6.03038	72.089	18.3707		49.7894	284.971	28.2386	166.232	8.09992	3.72286	409.198	20.6515
2021	[25176] AZIZI H. (2021)	ANATOLIA-IRAN BELT - CENOZOIC/QUATERNARY / IRAN / SANANDAJ-SIRJAN ARC//	47.285	36.5881	43.19	VOLCANIC ROCK	ANDESITE			MIOCENE		58.721	0.93471	6.22269	43.4847	0.232292	0.737	16.861	6.682				6.475	2.596	0.117	1.844	2.596	0.129	2.55736	14.3317	17.5523		122.898	9.90633		12.7781	2.5126	8.68167	64.7357	16.3136		36.1904	155.797	25.037	126.522	4.84235	3.69729	378.912	17.3794
2021	[25176] AZIZI H. (2021)	ANATOLIA-IRAN BELT - CENOZOIC/QUATERNARY / IRAN / SANANDAJ-SIRJAN ARC//	47.3199	36.6033	43.19	VOLCANIC ROCK	ANDESITE			MIOCENE		62.198	0.853492	8.44193	15.4729	0.370718	0.753	17.375	3.949				6.682	0.365	0.033	2.482	3.357	0.168	2.62375	18.1191	14.9794		133.114	12.3612		6.39164	4.24533	14.8038	89.4448	18.0975		81.6151	220.154	26.0787	178.682	8.12684	2.32653	552.172	23.6227
2021	[25176] AZIZI H. (2021)	ANATOLIA-IRAN BELT - CENOZOIC/QUATERNARY / IRAN / SANANDAJ-SIRJAN ARC//	47.5238	36.7711	43.19	VOLCANIC ROCK	ANDESITE			MIOCENE		62.592	0.95342	15.8556	19.7296	0.176994	0.585	17.855	5.173				4.769	0.642	0.037	3.484	3.821	0.219	1.06504	11.6277	9.90146		89.5265	4.89435		5.65654	1.67437	10.7661	33.2892	18.9906		63.1233	356.641	22.4931	185.675	8.96148	1.34606	559.112	33.1391
2021	[25176] AZIZI H. (2021)	ANATOLIA-IRAN BELT - CENOZOIC/QUATERNARY / IRAN / SANANDAJ-SIRJAN ARC//	47.5191	36.7713	43.19	VOLCANIC ROCK	ANDESITE			MIOCENE		56.741	0.910495	18.3428	42.8879	0.140158	0.734	19.669	4.945				6.813	1.875	0.045	2.976	3.644	0.306	1.39405	17.8762	20.9305		166.833	10.3584		8.61419	6.036	25.0624	123.258	20.5446		53.1619	379.299	20.6784	131.417	5.94891	0.936311	457.548	22.8371
2021	[25176] AZIZI H. (2021)	ANATOLIA-IRAN BELT - CENOZOIC/QUATERNARY / IRAN / SANANDAJ-SIRJAN ARC//	47.5047	36.7739	43.19	VOLCANIC ROCK	ANDESITE			MIOCENE		61.694	0.941476	20.1947	14.4612	0.124892	0.664	18.216	4.311				5.779	0.368	0.056	2.843	3.504	0.158	1.1065	12.9063	13.4257		120.369	12.2225		3.57857	4.04708	25.3584	66.0652	17.7441		42.3584	339.159	16.7945	113.96	3.24133	1.1096	398.913	16.0087
2021	[25176] AZIZI H. (2021)	ANATOLIA-IRAN BELT - CENOZOIC/QUATERNARY / IRAN / SANANDAJ-SIRJAN ARC//	47.4911	36.7764	43.19	VOLCANIC ROCK	ANDESITE			MIOCENE		58.939	0.777497	15.7318	21.5899	0.168612	0.681	18.353	4.74				7.781	0.659	0.097	2.986	3.785	0.186	2.99685	5.12168	14.1337		130.02	6.82438		4.89822	3.48887	12.2363	23.465	18.1933		62.1544	368.624	23.4318	141.271	7.13784	1.7039	502.129	22.3824
2021	[25176] AZIZI H. (2021)	ANATOLIA-IRAN BELT - CENOZOIC/QUATERNARY / IRAN / SANANDAJ-SIRJAN ARC//	47.4667	36.7902	43.19	VOLCANIC ROCK	ANDESITE			MIOCENE		62.775	0.936143	18.4515	15.4675	0.122981	0.654	18.02	5.033				6.255	0.465	0.031	1.581	3.748	0.166	0.795107	4.30126	12.8309		117.479	11.9152		5.10929	4.06793	19.2182	19.812	17.2865		45.2281	367.766	19.9315	117.135	3.79814	2.14128	364.027	16.8039
2021	[25176] AZIZI H. (2021)	ANATOLIA-IRAN BELT - CENOZOIC/QUATERNARY / IRAN / SANANDAJ-SIRJAN ARC//	47.3686	36.8338	43.19	VOLCANIC ROCK	ANDESITE			MIOCENE		61.135	0.892769	21.0979	21.8621	0.230886	0.754	18.735	4.87				6.271	0.688	0.022	3.345	3.625	0.233	1.93757	8.46747	18.052		146.896	29.4344		6.32207	9.23731	8.04324	30.238	19.0224		86.6442	375.268	17.787	134.855	7.77453	2.8254	587.688	25.0535
2021	[25176] AZIZI H. (2021)	ANATOLIA-IRAN BELT - CENOZOIC/QUATERNARY / IRAN / SANANDAJ-SIRJAN ARC//	47.3681	36.8246	43.19	VOLCANIC ROCK	ANDESITE			MIOCENE		56.889	0.814954	23.3531	22.5216	0.187786	0.788	18.902	5.144				7.998	0.755	0.056	2.357	3.709	0.206	3.47326	14.9606	20.4733		162.055	76.1404		9.55703	13.2164	11.3243	61.7001	18.9986		81.57	434.377	18.6004	141.129	7.62621	4.19261	505.902	23.9327
2021	[25176] AZIZI H. (2021)	ANATOLIA-IRAN BELT - CENOZOIC/QUATERNARY / IRAN / SANANDAJ-SIRJAN ARC//	47.358	36.8208	43.19	VOLCANIC ROCK	ANDESITE			MIOCENE		57.71	0.766356	17.6725	16.7899	0.230453	0.568	15.88	5.045				6.795	0.514	0.044	3.019	3.1	0.192	5.30011	9.98411	10.7135		83.754	9.15644		6.77794	9.52635	10.252	33.9779	17.048		98.0425	425.433	24.0732	113.07	10.2028	4.51857	799.843	33.2437
2021	[25176] AZIZI H. (2021)	ANATOLIA-IRAN BELT - CENOZOIC/QUATERNARY / IRAN / SANANDAJ-SIRJAN ARC//	47.3596	36.8225	43.19	VOLCANIC ROCK	ANDESITE			MIOCENE		57.69	0.682173	18.4189	22.636	0.255702	0.621	16.241	4.86				8.355	0.718	0.09	2.943	3.302	0.186	4.57023	14.7882	12.333		110.905	13.436		8.27155	6.37628	9.43775	56.8119	18.051		97.1188	379.812	20.6208	130.069	10.7761	2.8552	852.509	25.3129
2021	[25176] AZIZI H. (2021)	ANATOLIA-IRAN BELT - CENOZOIC/QUATERNARY / IRAN / SANANDAJ-SIRJAN ARC//	47.5069	36.7734	43.19	VOLCANIC ROCK	ANDESITE			MIOCENE		60.098	0.884023	14.0404	17.3388	0.117115	0.574	17.623	4.702				5.721	0.498	0.093	3.525	3.476	0.289	2.09302	13.1496	14.5271		113.452	11.3323		10.5467	5.28121	20.3639	19.7701	19.6395		47.5645	406.134	28.9262	149.384	9.92904	0.863994	4763.46	24.4171
2011	[15715] SPAGNUOLO M. G. (2011)	ANDEAN ARC / SOUTHERN ANDEAN VOLCANIC ZONE / ARGENTINA / CHARILEHUE FORMATION//	-69.5	-36.5	34.47	VOLCANIC ROCK	ANDESITE			MIOCENE		57	0.951703	26.2136	43.8234	0.118519	0.68	17.59	6.55			5.89	5.69	2.58	0.12	1.91	3.69	0.32	2.64		10			0		16	0					64	540	20.6	217	18.1	0.6	337	23.8
2011	[15715] SPAGNUOLO M. G. (2011)	ANDEAN ARC / SOUTHERN ANDEAN VOLCANIC ZONE / ARGENTINA / CHARILEHUE FORMATION//	-69.5	-36.5	34.47	VOLCANIC ROCK	TRACHYANDESITE			MIOCENE		57.36	0.887916	12.5228	38.4135	0.179612	1.09	16.91	7.43			6.69	5.53	2.34	0.13	2.09	4.09	0.44	1.09		14			0		18	30					74	412	32.9	278	25.6	1.9	421	26.9
2011	[15715] SPAGNUOLO M. G. (2011)	ANDEAN ARC / SOUTHERN ANDEAN VOLCANIC ZONE / ARGENTINA / CHARILEHUE FORMATION//	-69.5	-36.5	34.47	VOLCANIC ROCK	ANDESITE			MIOCENE		57.08	0.903525	26.5455	44.0568	0.104452	0.75	17.95	6.79			6.11	6.13	2.7	0.14	2.1	3.92	0.35	2.49		11			0		15	0					61	584	22	194	17.2	0.7	388	23.3
2010	[14391] GERMA A. (2010)	ANDEAN ARC / SOUTHERN ANDEAN VOLCANIC ZONE / ARGENTINA / PAYUN MATRU VOLCANIC FIELD//	-69.2101	-36.3803	34.47	VOLCANIC ROCK	TRACHYANDESITE			PLEISTOCENE		58.99	0.877749	12.4051	33.8042	0.232143	1.28	17.68	6.05				3.49	1.56	0.15	4.16	5.65	0.46	0.19													91	392	31.6	549	53.8		688	43.7
2014	[18070] HERNANDO I. R. (2014)	ANDEAN ARC / SOUTHERN ANDEAN VOLCANIC ZONE / ARGENTINA / PAYUN MATRU VOLCANIC FIELD//	-69.1983	-36.3803	34.47	VOLCANIC ROCK	TRACHYANDESITE			QUATERNARY		60.08	0.887266	16.5234	32.7636	0.219858	1.27	17.41	5.69				3.19	1.4	0.131	3.94	5.81	0.41	0.31		9		51	0		14	0	0	60	25	0	93	423	25.6	479	53.6	0.9	768	33.2
2014	[18070] HERNANDO I. R. (2014)	ANDEAN ARC / SOUTHERN ANDEAN VOLCANIC ZONE / ARGENTINA / PAYUN MATRU VOLCANIC FIELD//	-69.3118	-36.3334	34.47	VOLCANIC ROCK	TRACHYANDESITE			QUATERNARY		58.39	0.884336	18.5926	36.9376	0.177291	1.312	18.04	6.12				4.15	1.81	0.14	3.76	5.34	0.56	0.42		9		77	0		11	0	0	100	23	0	89	502	27	479	53	0.9	706	43.8
2014	[18070] HERNANDO I. R. (2014)	ANDEAN ARC / SOUTHERN ANDEAN VOLCANIC ZONE / ARGENTINA / PAYUN MATRU VOLCANIC FIELD//	-69.1604	-36.3809	34.47	VOLCANIC ROCK	NOT GIVEN			QUATERNARY		61.96	0.949108	25.2062	30.4462	0.210634	0.727	18.34	3.71				2.96	0.82	0.089	4.02	5.83	0.16	0.49		5		28	0		12	0	20	60	22	0	103	489	19.4	441	44.2	4.2	698	26.2
2014	[18070] HERNANDO I. R. (2014)	ANDEAN ARC / SOUTHERN ANDEAN VOLCANIC ZONE / ARGENTINA / PAYUN MATRU VOLCANIC FIELD//	-69.1501	-36.3822	34.47	VOLCANIC ROCK	NOT GIVEN			QUATERNARY		62.41	0.94171	21.5179	29.4402	0.253112	0.709	18.12	3.56				2.93	0.75	0.088	4.01	5.82	0.16	0.64		4		23	0		14	20	0	40	24	0	122	482	22.4	435	47.1	5.6	698	28.7
2014	[18070] HERNANDO I. R. (2014)	ANDEAN ARC / SOUTHERN ANDEAN VOLCANIC ZONE / ARGENTINA / PAYUN MATRU VOLCANIC FIELD//	-69.1964	-36.3751	34.47	VOLCANIC ROCK	NOT GIVEN			QUATERNARY		64.11	0.951955	18.5484	27.2246	0.388406	0.671	17.73	3.6				2.2	0.68	0.093	4.56	5.89	0.07	0.27		4		18	0		10	0	0	0	21	0	134	345	18.6	516	50.6	5	652	19
2014	[18070] HERNANDO I. R. (2014)	ANDEAN ARC / SOUTHERN ANDEAN VOLCANIC ZONE / ARGENTINA / PAYUN MATRU VOLCANIC FIELD//	-69.1832	-36.3808	34.47	VOLCANIC ROCK	NOT GIVEN			QUATERNARY		63.66	0.923058	14.0467	31.8007	0.32133	0.713	16.93	3.95				2.56	0.93	0.104	4.21	5.55	0.24	0.16		4		30	0		8	0	20	0	17	0	116	361	25.7	480	44.1	4.3	607	37.7
2014	[18070] HERNANDO I. R. (2014)	ANDEAN ARC / SOUTHERN ANDEAN VOLCANIC ZONE / ARGENTINA / PAYUN MATRU VOLCANIC FIELD//	-69.1803	-36.3672	34.47	VOLCANIC ROCK	NOT GIVEN			QUATERNARY		63.03	0.922537	14.0214	32.0151	0.324873	0.771	17.17	4.5				2.81	1.07	0.123	4.04	5.55	0.29	0.36		4		35	0		13	0	10	50	21	0	128	394	28.1	483	48.1	3.4	614	38.5
2014	[18070] HERNANDO I. R. (2014)	ANDEAN ARC / SOUTHERN ANDEAN VOLCANIC ZONE / ARGENTINA / PAYUN MATRU VOLCANIC FIELD//	-69.2012	-36.3739	34.47	VOLCANIC ROCK	NOT GIVEN			QUATERNARY		57.82	0.835492	24.251	38.5939	0.138564	1.222	17.08	7.09				4.88	2.25	0.134	3.03	5.04	0.44	0.51		8		89	0		16	0	0	60	20	0	83	599	24.7	363	37.4	2.3	576	30.7
2014	[18070] HERNANDO I. R. (2014)	ANDEAN ARC / SOUTHERN ANDEAN VOLCANIC ZONE / ARGENTINA / PAYUN MATRU VOLCANIC FIELD//	-69.11	-36.4104	34.47	VOLCANIC ROCK	NOT GIVEN			QUATERNARY		59.96	0.928506	19.48	33.9506	0.158111	0.891	17.73	5.24				3.36	1.36	0.142	3.73	5.44	0.48	0.55		6		39	0		9	0	20	110	19	6	77	487	25	418	48	2.3	631	40.3
2014	[18070] HERNANDO I. R. (2014)	ANDEAN ARC / SOUTHERN ANDEAN VOLCANIC ZONE / ARGENTINA / PAYUN MATRU VOLCANIC FIELD//	-69.2723	-36.473	34.47	VOLCANIC ROCK	NOT GIVEN			QUATERNARY		60.92	0.978796	19.3077	27.3627	0.169323	0.686	17.57	5.31				2.62	1.01	0.166	3.49	5.72	0.42	0.72		3		0	0		9	0	0	110	22	0	85	502	26	395	47	2.8	1065	56.5
2014	[18070] HERNANDO I. R. (2014)	ANDEAN ARC / SOUTHERN ANDEAN VOLCANIC ZONE / ARGENTINA / PAYUN MATRU VOLCANIC FIELD//	-69.1774	-36.3833	34.47	VOLCANIC ROCK	NOT GIVEN			QUATERNARY		60.3	0.905619	11.9333	29.8077	0.371508	0.943	17.94	5.27				2.72	1.13	0.143	4.69	5.95	0.42	0.05		5		28	0		8	0	0	120	20	10	133	358	30	681	74	6.3	674	47.5
2014	[18070] HERNANDO I. R. (2014)	ANDEAN ARC / SOUTHERN ANDEAN VOLCANIC ZONE / ARGENTINA / PAYUN MATRU VOLCANIC FIELD//	-69.1875	-36.3729	34.47	VOLCANIC ROCK	NOT GIVEN			QUATERNARY		61.41	0.966583	26	28.0572	0.145105	0.702	17.46	5.84				2.78	1.15	0.15	3.66	5.5	0.47	-0.09		3		17	0		9	0	0	130	19	7	83	572	22	421	48	1.6	1015	46.4
2014	[18070] HERNANDO I. R. (2014)	ANDEAN ARC / SOUTHERN ANDEAN VOLCANIC ZONE / ARGENTINA / PAYUN MATRU VOLCANIC FIELD//	-69.3293	-36.3686	34.47	VOLCANIC ROCK	NOT GIVEN			QUATERNARY		57.35	0.833162	21.7143	36.2096	0.134868	1.346	17.76	6.35				4.16	1.82	0.164	3.8	5.86	0.61	0.34		7		42	0		11	0	0	70	23	0	82	608	28	370	57	2.4	906	41.5
2014	[18070] HERNANDO I. R. (2014)	ANDEAN ARC / SOUTHERN ANDEAN VOLCANIC ZONE / ARGENTINA / PAYUN MATRU VOLCANIC FIELD//	-69.2813	-36.4919	34.47	VOLCANIC ROCK	BASALT			QUATERNARY		62.1	0.9491	10.4857	26.893	0.223433	0.972	17.18	5.33				2.36	0.99	0.155	3.99	5.77	0.37	0.2		6		19	0		7	0	0	110	23	0	82	367	35	400	48	0	954	58.1
2014	[18070] HERNANDO I. R. (2014)	ANDEAN ARC / SOUTHERN ANDEAN VOLCANIC ZONE / ARGENTINA / PAYUN MATRU VOLCANIC FIELD//	-69.2953	-36.4866	34.47	VOLCANIC ROCK	BASALT			QUATERNARY		63.06	0.890191	10.303	28.2899	0.264706	0.903	16.58	4.97				2.33	0.99	0.152	4.19	5.99	0.33	0.35		7		16	0		9	0	0	80	25	0	90	340	33	383	60	2.8	942	49.4
2013	[18602] SOAGER N.(2013) [GeoReM [7576] ]	ANDEAN ARC / SOUTHERN ANDEAN VOLCANIC ZONE / ARGENTINA / PAYUN MATRU VOLCANIC FIELD//	-69.2086	-36.3755	34.47	VOLCANIC ROCK	ANDESITE			PLEISTOCENE-HOLOCENE		63.11	0.934053	13.6619	32.3055	0.384231	0.71	17.57	4.15				2.64	1	0.11	4.57	5.51	0.27	0.1		7.34695	0.411707	27.4046	1.15359	0.0812802	4.71913	1.20876	5.85679	54.6574	21.4218		140.111	364.653	26.6913	462.145	59.4587	3.65652	605.381	41.8821
2013	[18602] SOAGER N.(2013) [GeoReM [7576] ]	ANDEAN ARC / SOUTHERN ANDEAN VOLCANIC ZONE / ARGENTINA / PAYUN MATRU VOLCANIC FIELD//	-69.3213	-36.502	34.47	VOLCANIC ROCK	ANDESITE			PLEISTOCENE-HOLOCENE		61.81	0.859899	8.52951	29.1575	0.318233	0.78	16.41	4.86				2.58	1.01	0.14	4.3	5.92	0.28	1.7		9.35655	0.469418	16.8381	4.65931	0.10545	12.1546	1.93185	6.27481	72.066	22.3332		88.3303	277.565	32.5417	426.922	50.9222	2.63676	946.953	49.4153
2014	[18961] ESPANON V. R.(2014) [GeoReM [8382] ]	ANDEAN ARC / SOUTHERN ANDEAN VOLCANIC ZONE / ARGENTINA / PAYUN MATRU VOLCANIC FIELD//	-69.4065	-36.2551	34.47	VOLCANIC ROCK	TRACHYTE			QUATERNARY		63.21	0.989906	12.5356	20.9182	0.369158	0.7445	18.6			4.124		2.708	0.612	0.1005	4.435	5.511	0.2754			7.64448		56.9199					23.1994		21.3376		137.719	373.063	29.7603	615.006	60.683	7.22088	666.823	44.0346
2014	[18961] ESPANON V. R.(2014) [GeoReM [8382] ]	ANDEAN ARC / SOUTHERN ANDEAN VOLCANIC ZONE / ARGENTINA / PAYUN MATRU VOLCANIC FIELD//	-69.3678	-36.4919	34.47	VOLCANIC ROCK	NOT GIVEN			QUATERNARY		61.48	0.919422	15.6696	29.4573	0.285017	0.7919	18.04			4.102		2.885	0.961	0.09889	4.348	5.878	0.2656			6.41962		42.2258					9.20784		20.4661		123.027	431.647	27.5469	552.662	56.1669	5.61477	642.633	41.7275
2014	[18961] ESPANON V. R.(2014) [GeoReM [8382] ]	ANDEAN ARC / SOUTHERN ANDEAN VOLCANIC ZONE / ARGENTINA / PAYUN MATRU VOLCANIC FIELD//	-69.3851	-36.4562	34.47	VOLCANIC ROCK	NOT GIVEN			QUATERNARY		62.01	0.920631	11.7603	27.3022	0.372207	0.7179	17.79			3.963		2.482	0.835	0.09712	4.77	5.865	0.2888			5.47956		41.5171					276.394		21.3867		117.516	315.727	26.8469	589.898	59.4247	3.75451	619.47	39.9321
2010	[14391] GERMA A. (2010)	ANDEAN ARC / SOUTHERN ANDEAN VOLCANIC ZONE / ARGENTINA / PAYUN//	-69.3454	-36.5133	34.47	VOLCANIC ROCK	TRACHYTE			PLEISTOCENE		63.46	0.975273	8.97959	19.7026	0.378788	0.74	17.39	4.52				1.83	0.56	0.14	4.6	5.79	0.23	0.66													100	264	29.4	493	46.6		783	52.3
2010	[14391] GERMA A. (2010)	ANDEAN ARC / SOUTHERN ANDEAN VOLCANIC ZONE / ARGENTINA / PAYUN//	-69.2948	-36.4952	34.47	VOLCANIC ROCK	TRACHYTE			PLEISTOCENE		62.61	0.916594	10.5	29.0201	0.257738	0.91	17.19	5.28				2.41	1.09	0.15	4.19	5.98	0.35	0.06													86.6	336	32	436	47.6		907	51
2010	[14391] GERMA A. (2010)	ANDEAN ARC / SOUTHERN ANDEAN VOLCANIC ZONE / ARGENTINA / PAYUN//	-69.2	-36.5	34.47	VOLCANIC ROCK	TRACHYANDESITE			PLEISTOCENE		58.86	0.841614	18.807	35.8576	0.172201	1.37	16.92	7.05				4.25	1.99	0.14	3.76	5.05	0.62	0.05													92.3	536	28.5	392	44.8		644	44.5
2010	[14391] GERMA A. (2010)	ANDEAN ARC / SOUTHERN ANDEAN VOLCANIC ZONE / ARGENTINA / PAYUN//	-69.2	-36.5	34.47	VOLCANIC ROCK	TRACHYTE			PLEISTOCENE		62.84	0.91666	8.76582	26.8724	0.330686	0.84	17	5.12				2.17	0.95	0.15	4.37	6	0.31	0.25													91.6	277	31.6	457	49		898	49.8
2010	[14391] GERMA A. (2010)	ANDEAN ARC / SOUTHERN ANDEAN VOLCANIC ZONE / ARGENTINA / PAYUN//	-69.3058	-36.488	34.47	VOLCANIC ROCK	TRACHYTE			PLEISTOCENE		62.28	0.91972	10.4747	28.7604	0.264653	0.9	17.21	5.2				2.39	1.06	0.15	4.2	5.97	0.35	0.16													87.6	331	31.6	442	48.2		901	49.6
2014	[18324] BRENNA M.(2014) [GeoReM [7776] ]	CENTRAL ASIAN FOLDBELT - CENOZOIC/QUATERNARY / KOREAN PENINSULA - CENOZOIC/QUATERNARY / KOREAN PENINSULA / ULLEUNG ISLAND	130.825	37.4722	14.19	VOLCANIC ROCK	TRACHYTE			QUATERNARY		56.3403	0.895016	26.9352	32.1465	0.122676	1.35783	18.4277	4.94638				3.51096	1.18325	0.146452	4.7815	5.48952	0.427717	1.74641		6.87333		34.0262	6.99991		22.423	5.65047	8.29533	109.441	25.2483		93.5265	762.385	28.3044	466.303	130.614	1.33455	1771.91	94.9313
2014	[18324] BRENNA M.(2014) [GeoReM [7776] ]	CENTRAL ASIAN FOLDBELT - CENOZOIC/QUATERNARY / KOREAN PENINSULA - CENOZOIC/QUATERNARY / KOREAN PENINSULA / ULLEUNG ISLAND	130.907	37.5461	14.19	VOLCANIC ROCK	TRACHYTE			QUATERNARY		60.6686	0.904272	11.5588	24.1337	0.361092	0.539632	19.017	3.85737				1.82875	0.619577	0.152896	6.10584	6.7454	0.157892	0.0285194		5.65892		16.3719	5.59741		10.7027	16.5257	10.467	88.882	24.7373		109.795	304.064	26.3058	585.985	154.595	0.900096	625.659	89.4765
2014	[18324] BRENNA M.(2014) [GeoReM [7776] ]	CENTRAL ASIAN FOLDBELT - CENOZOIC/QUATERNARY / KOREAN PENINSULA - CENOZOIC/QUATERNARY / KOREAN PENINSULA / ULLEUNG ISLAND	130.865	37.505	14.19	VOLCANIC ROCK	NOT GIVEN			QUATERNARY		56.6702	0.850977	19.2872	37.7041	0.303796	1.04246	18.4863	5.84772				3.46495	1.78708	0.151902	5.64915	5.65908	0.312739	0.423019		8.28991		57.6298	38.0907		25.2231	28.0061	17.4971	89.7061	21.8969		117.571	387.006	20.0655	354.788	122.441	0.854214	523.443	77.2962
2021	[24484] CHOI SUNG HI (2021)	CENTRAL ASIAN FOLDBELT - CENOZOIC/QUATERNARY / KOREAN PENINSULA - CENOZOIC/QUATERNARY / KOREAN PENINSULA / ULLEUNG ISLAND	130.795	37.514	14.19	VOLCANIC ROCK	TRACHYTE			QUATERNARY		60.71	0.862793	16.1667	23.6658	0.31701	0.667	18.07	4.28				2.33	0.67	0.146	5.8	6.34	0.18		14	2		18	9.4		3.5	1.8	0	80	24		123	388	24	575	134	1.2	651	86.4
2021	[24484] CHOI SUNG HI (2021)	CENTRAL ASIAN FOLDBELT - CENOZOIC/QUATERNARY / KOREAN PENINSULA - CENOZOIC/QUATERNARY / KOREAN PENINSULA / ULLEUNG ISLAND	130.854	37.5184	14.19	VOLCANIC ROCK	TRACHYANDESITE			QUATERNARY		56.68	0.895688	20.35	32.6953	0.371007	1.199	19.33	5.3				3.45	1.3	0.148	5.83	5.47	0.29		11.2	4		56	13.5		8.9	5.9	20	80	22		151	407	20	481	116	1.5	743	89
2021	[24484] CHOI SUNG HI (2021)	CENTRAL ASIAN FOLDBELT - CENOZOIC/QUATERNARY / KOREAN PENINSULA - CENOZOIC/QUATERNARY / KOREAN PENINSULA / ULLEUNG ISLAND	130.855	37.5218	14.19	VOLCANIC ROCK	TRACHYANDESITE			QUATERNARY		56.71	0.823105	24.6	36.116	0.292683	1.301	18.21	5.5				3.94	1.57	0.144	5.66	5.37	0.34		9.19	5		68	13.7		11.4	7.5	0	80	22		144	492	20	447	118	1.3	883	85
2021	[24484] CHOI SUNG HI (2021)	CENTRAL ASIAN FOLDBELT - CENOZOIC/QUATERNARY / KOREAN PENINSULA - CENOZOIC/QUATERNARY / KOREAN PENINSULA / ULLEUNG ISLAND	130.854	37.5205	14.19	VOLCANIC ROCK	PHONOLITE			QUATERNARY		56.55	0.827258	26	34.0651	0.301923	1.282	18.89	5.52				3.6	1.44	0.143	6.28	5.77	0.32		9.57	5		62	7		10	5.6	0	80	24		157	520	20	476	128	1.4	852	93.1
2002	[15222] FEDOROV P. I. (2002)	HONSHU ARC / SOUTHWESTERN HONSHU ARC / ULREUNG(ULLYNDO)/DAGELET/KOREA/	130.78	37.55	14.19	VOLCANIC ROCK	TRACHYANDESITE			PLIOCENE-QUATERNARY		56.4	0.856818	15.25	36.792	0.262295	1.29	19	5.58				3.76	1.64	0.14	5.63	5.62	0.32			4.96			101		9.93	88					160	610	40	480			870	87.5
2002	[15222] FEDOROV P. I. (2002)	HONSHU ARC / SOUTHWESTERN HONSHU ARC / ULREUNG(ULLYNDO)/DAGELET/KOREA/	130.78	37.55	14.19	VOLCANIC ROCK	TRACHYANDESITE			PLIOCENE-QUATERNARY		57.53	0.928098	20.6818	28.9774	0.340659	1	19.41		4.35	4.325	0.41	2.52	0.99	0.14	5.97	6	0.26	1.03		11.8			5.4		7	5.7					155	455	22	504	138		954
1995	[3574] KANEKO T. (1995)	HONSHU ARC / CENTRAL HONSHU ARC / HONSHU / NORIKURA//	136.5	37	23.09	VOLCANIC ROCK	ANDESITE, AUGITE-BIOTITE-HORNBLENDE-HYPERSTHENE			QUATERNARY		61.52	0.897844	25.8636	42.5923	0.119508	0.87	16.71			5.91		5.66	2.46	0.11	2.14	3.65	0.32			13		123	4			6.3	16	73	19		68	569	22	176	9.6		490
1995	[3574] KANEKO T. (1995)	HONSHU ARC / CENTRAL HONSHU ARC / HONSHU / WASHIBA AND KUMONOTAIRA//	136.5	37	23.09	VOLCANIC ROCK	ANDESITE, HORNBLENDE-AUGITE-HYPERSTHENE			QUATERNARY		58.96	0.937114	17.5652	38.4396	0.136139	0.97	16.81			7.85		5.75	2.75	0.14	1.99	3.24	0.28			23		193	4			4.2	8	79	19		55	404	23	163	7.1		511
1995	[3574] KANEKO T. (1995)	HONSHU ARC / CENTRAL HONSHU ARC / HONSHU / WASHIBA AND KUMONOTAIRA//	136.5	37	23.09	VOLCANIC ROCK	ANDESITE, AUGITE-HYPERSTHENE			QUATERNARY		56.38	0.897298	20.2174	43.987	0.088172	1.04	17.63			8.33		7.07	3.67	0.15	1.55	3.11	0.27			25		205	10			8.1	23	85	20		41	465	23	137	6.2		372
2002	[9895] LOPEZ J. C. (2002)	HONSHU ARC / CENTRAL HONSHU ARC / HONSHU / ANAMIZU FORMATION//	137	37.5	26.39	VOLCANIC ROCK	ANDESITE, BASALTIC, THOLEIITIC			NEOGENE		56.61	0.875211	11.2	40.2992	0.0535714	0.99	17.9			7.42		6.68	2.81	0.15	1.17	4.28	0.25					181				23					21	392	35	212	6		375	18.59
2004	[7401] WADA H. (2004)	HONSHU ARC / CENTRAL HONSHU ARC / HONSHU / KUROBEGAWA GRANITIC PLUTON//	137.6	37.1	26.39	PLUTONIC ROCK	NOT GIVEN			PLIOCENE		58.47	0.929668	11.4516	36.7866	0.290141	0.85	17.25	8.44				5.48	2.48	0.21	2.36	3.67	0.33					133				0.5		63	18		103	355	31	133	6.5		357	20
2004	[7401] WADA H. (2004)	HONSHU ARC / CENTRAL HONSHU ARC / HONSHU / KUROBEGAWA GRANITIC PLUTON//	137.6	37.1	26.39	PLUTONIC ROCK	NOT GIVEN			PLIOCENE		59.49	0.876304	18.1818	37.5026	0.2075	0.69	17.27	7.36				6.01	2.23	0.26	2.17	3.91	0.38					98						74	18		83	400	22	104	3.4		285	20
2004	[7401] WADA H. (2004)	HONSHU ARC / CENTRAL HONSHU ARC / HONSHU / KUROBEGAWA GRANITIC PLUTON//	137.6	37.1	26.39	PLUTONIC ROCK	DIORITE			PLIOCENE		63.93	0.985069	29.3571	42.7011	0.145985	0.57	16.42	5.82				4.97	2.19	0.11	2.31	3.12	0.21					90				8.7		47	16		60	411	14	150	4.9		432	28
2004	[7401] WADA H. (2004)	HONSHU ARC / CENTRAL HONSHU ARC / HONSHU / KUROBEGAWA GRANITIC PLUTON//	137.6	37.1	26.39	PLUTONIC ROCK	DIORITE			PLIOCENE		58.83	0.917339	26.1111	41.2051	0.119149	0.82	17.61	7.63				6.56	2.7	0.17	1.61	3.36	0.28					143				9.4		83	18		56	470	18	209	4.4		311	16
2016	[20281] OKAMURA S. (2016)	HONSHU ARC / CENTRAL HONSHU ARC / HONSHU / HACHIKOKUSAN FORMATION//	138.384	37.18	27.71	VOLCANIC ROCK	ANDESITE, 2-PYROXENE-HORNBLENDE			MIOCENE-PLIOCENE		60.02	0.872916	18.7347	44.0931	0.171678	0.57	17.36	6.78				6.87	2.7	0.19	2.32	2.97	0.25	0.19	11	17.1		152	14		13.8	9	28	83	16.7		78.8	459	24.5	95.7	2.6	2.3	295	13.37
1995	[5513] KANEKO T. (1995)	HONSHU ARC / CENTRAL HONSHU ARC / HONSHU / KENASHI//	138.2	37	27.71	VOLCANIC ROCK	ANDESITE, AUGITE-HYPERSTHENE			QUATERNARY		58.19	0.898475	12.0275	44.7943	0.0939028	0.77	17.24			8.04		7.3	3.66	0.14	1.21	2.8	0.17			28.1		182.4	18.9			15.1	39.4	82	16.8		28.8	306.7	25.5	98.2	4.3		453.7
1995	[5513] KANEKO T. (1995)	HONSHU ARC / CENTRAL HONSHU ARC / HONSHU / MADARAO//	138.2	37	27.71	VOLCANIC ROCK	ANDESITE, AUGITE-HYPERSTHENE			QUATERNARY		57.87	0.954961	15.7328	43.5377	0.0486361	0.65	17.75			7.79		7.32	3.37	0.18	0.91	2.61	0.23			17.3		128.2	21.2			11.9	27.9	74.8	16.3		18.9	388.6	24.7	52.3	3.7		303.9
2021	[24682] AIZAWA M. (2021)	HONSHU ARC / NORTHEASTERN HONSHU ARC / HONSHU / YONEYAMA VOLCANICS//	138.5	37.2417	27.71	VOLCANIC ROCK	ANDESITE			PLIOCENE-PLEISTOCENE		61.72	0.925564	20	39.9269	0.174	0.48	16.56	5.9				5.47	1.98	0.21	2.22	3.37	0.27	0.06		59.2		72	12		66	4					87	500	25	102	0.46	0.34	311	1.82
2016	[20281] OKAMURA S. (2016)	HONSHU ARC / NORTHEASTERN HONSHU ARC / SADO-SHIMA / SANZE FORMATION//	138.344	37.83	27.71	VOLCANIC ROCK	ANDESITE, 2-PYROXENE			MIOCENE		57.85	0.892464	23.1613	20.2408	0.182849	1.02	16.84	7.57				6.19	0.97	0.14	1.26	3.8	0.2	2.38	2.9	31.2		173	9		28.7	3	41	79	15.9		91.9	502.6	21.7	163	13.55	0.76	426.2	14.01
2016	[20281] OKAMURA S. (2016)	HONSHU ARC / NORTHEASTERN HONSHU ARC / SADO-SHIMA / SANZE FORMATION//	138.339	37.87	27.71	VOLCANIC ROCK	ANDESITE, 2-PYROXENE-HORNBLENDE			MIOCENE		58.74	0.921213	35.0492	41.7727	0.111787	0.82	16.8	7.15				5.64	2.59	0.08	2.39	3.28	0.21	1.4	21.6	16.7		152	22		15.7	3	30	68	18		71.7	641.4	18.3	138	6.01	9.67	496.1	21.1
2021	[24947] YAMAMOTO T. (2021)	HONSHU ARC / NORTHEASTERN HONSHU ARC / HONSHU / HIWADA CALDERA / HIWADA FORMATION/	139.779	37.3571	28.92	PLUTONIC ROCK	TONALITE	2900000		PLIOCENE		62.75	0.925216	7.35484	33.5289	0.0657895	0.802	14.96	7.46				4.61	1.9	0.208	1.07	4.03	0.41	1.07				62									15	228	31	88	2	0.4	348	12.2
2021	[24947] YAMAMOTO T. (2021)	HONSHU ARC / NORTHEASTERN HONSHU ARC / HONSHU / HIWADA CALDERA / HIWADA FORMATION/	139.779	37.3571	28.92	PLUTONIC ROCK	TONALITE	2900000		PLIOCENE		61.76	0.870714	6.39394	35.5433	0.0805687	0.836	15.28	7.65				5.43	2.13	0.23	1.18	3.89	0.13	0.77				109									17	211	33	92	3	0.7	240	9.4
2021	[24947] YAMAMOTO T. (2021)	HONSHU ARC / NORTHEASTERN HONSHU ARC / HONSHU / HIWADA CALDERA / HIWADA FORMATION/	139.773	37.3515	28.92	PLUTONIC ROCK	TONALITE	2900000		PLIOCENE		63.44	0.924559	5.4	33.6906	0.134259	0.716	15.89	5.73				5	1.47	0.162	1.75	3.77	0.2	2.04				62									29	216	40	101	3	0.4	351	12.1
2021	[24947] YAMAMOTO T. (2021)	HONSHU ARC / NORTHEASTERN HONSHU ARC / HONSHU / HIWADA CALDERA / HIWADA FORMATION/	139.773	37.3515	28.92	PLUTONIC ROCK	TONALITE	2900000		PLIOCENE		61.7	0.859507	6.08824	35.9864	0.0676329	0.812	15.09	7.68				5.73	2.18	0.211	1.2	3.55	0.15	0.41				114									14	207	34	71	2	0.4	276	10
2021	[24947] YAMAMOTO T. (2021)	HONSHU ARC / NORTHEASTERN HONSHU ARC / HONSHU / HIWADA CALDERA / HIWADA FORMATION/	139.773	37.3515	28.92	PLUTONIC ROCK	TONALITE	2900000		PLIOCENE		63.98	0.981795	5.54054	36.2461	0.0878049	0.756	15.65	6.34				4.48	1.82	0.157	0.94	4.12	0.23	1.36				113									18	205	37	133	4	0.4	297	12.3
2021	[24947] YAMAMOTO T. (2021)	HONSHU ARC / NORTHEASTERN HONSHU ARC / HONSHU / HIWADA CALDERA / HIWADA FORMATION/	139.803	37.2176	28.92	PLUTONIC ROCK	TONALITE	2900000		PLIOCENE		63.67	0.94645	8.35714	36.9763	0.0598291	0.74	15.28	6.92				4.6	2.05	0.216	1.14	3.98	0.4	0.94				59									14	234	28	92	4	0.4	369	11.9
2021	[24947] YAMAMOTO T. (2021)	HONSHU ARC / NORTHEASTERN HONSHU ARC / HONSHU / HIWADA CALDERA / HIWADA FORMATION/	139.803	37.2176	28.92	PLUTONIC ROCK	TONALITE	2900000		PLIOCENE		63.35	0.948851	8.06897	37.6679	0.0470085	0.812	15.03	7.21				4.49	2.2	0.209	1.15	3.91	0.43	1.03				68									11	234	29	88	4	0.4	347	12.8
2021	[24947] YAMAMOTO T. (2021)	HONSHU ARC / NORTHEASTERN HONSHU ARC / HONSHU / HIWADA CALDERA / HOTOKEZAWA IGNIMBRITE/	139.77	37.4746	28.92	VOLCANIC ROCK	NOT GIVEN	2900000		PLIOCENE		66.54	0.986001	5.7	34.7172	0.274854	0.491	14.35	4.32				3.86	1.16	0.108	1.81	3.39	0.1	2.44				70									47	171	30	109	3	2	417	12.6
2021	[24947] YAMAMOTO T. (2021)	HONSHU ARC / NORTHEASTERN HONSHU ARC / HONSHU / HIWADA CALDERA / HOTOKEZAWA IGNIMBRITE/	139.77	37.4746	28.92	VOLCANIC ROCK	NOT GIVEN	2900000		PLIOCENE		67.93	0.988066	5.82759	36.1074	0.284024	0.487	14.49	3.89				3.78	1.11	0.092	1.88	3.5	0.1	2.16				70									48	169	29	108	2	2	422	12.4
2021	[24947] YAMAMOTO T. (2021)	HONSHU ARC / NORTHEASTERN HONSHU ARC / HONSHU / HIWADA CALDERA / HOTOKEZAWA IGNIMBRITE/	139.77	37.4746	28.92	VOLCANIC ROCK	NOT GIVEN	2900000		PLIOCENE		67.73	0.980246	6.5	36.3965	0.236264	0.496	14.82	4.43				4.17	1.28	0.105	1.72	3.45	0.1	1.86				73									43	182	28	106	3	1.8	374	12.1
2021	[24947] YAMAMOTO T. (2021)	HONSHU ARC / NORTHEASTERN HONSHU ARC / HONSHU / HIWADA CALDERA / HOTOKEZAWA IGNIMBRITE/	139.77	37.4746	28.92	VOLCANIC ROCK	NOT GIVEN	2900000		PLIOCENE		66.8	0.990392	6.85185	34.8697	0.189189	0.503	14.78	4.55				4.16	1.23	0.09	1.45	3.52	0.09	1.89				75									35	185	27	103	2	1.4	370	12.3
2021	[24947] YAMAMOTO T. (2021)	HONSHU ARC / NORTHEASTERN HONSHU ARC / HONSHU / HIWADA CALDERA / HOTOKEZAWA IGNIMBRITE/	139.809	37.2825	28.92	VOLCANIC ROCK	NOT GIVEN	2900000		PLIOCENE		67.26	0.993203	6.88462	37.994	0.162011	0.511	13.95	5.43				3.83	1.68	0.104	1.33	3.43	0.1	1.37				84									29	179	26	92	2	0.6	293	9.5
2021	[24947] YAMAMOTO T. (2021)	HONSHU ARC / NORTHEASTERN HONSHU ARC / HONSHU / HIWADA CALDERA / HOTOKEZAWA IGNIMBRITE/	139.809	37.2825	28.92	VOLCANIC ROCK	NOT GIVEN	2900000		PLIOCENE		67.08	0.965017	6.7	32.7885	0.174129	0.54	14.86	5.44				4.44	1.34	0.108	1.51	3.46	0.09	1.12				83									35	201	30	103	2	0.9	325	11.5
2012	[16433] TAGLIANI S. (2012)	ETNA/SICILY / ELLITTICO SEQUENCE///	14.87	37.65	30.44	VOLCANIC ROCK	BENMOREITE			QUATERNARY		57.18	0.812643	34.4516	38.7404	0.0505618	1.39	17.45		5.11	6.539	1.94	6.16	2.32	0.15	2.09	4.87	0.68	0.68		15		116			11						54	1068	31	372	95	0.6	1329	128
2012	[16433] TAGLIANI S. (2012)	ETNA/SICILY / ELLITTICO SEQUENCE///	14.87	37.65	30.44	VOLCANIC ROCK	BENMOREITE			QUATERNARY		56.99	0.77378	36.2333	38.547	0.0873965	1.34	17.4		6.9	6.28	0.07	6.47	2.21	0.14	2.43	4.92	0.67	0.37		15		86			9						95	1087	30	355	92	1.5	1258	123
2012	[16433] TAGLIANI S. (2012)	ETNA/SICILY / ELLITTICO SEQUENCE///	14.87	37.65	30.44	VOLCANIC ROCK	BENMOREITE			QUATERNARY		58.2	0.850218	32.1818	39.8454	0.0612053	1.42	17.41		6.77	6.243	0.15	5.44	2.32	0.16	2.06	5.08	0.67	0.44		16		111			11						65	1062	33	385	106	0.9	1241	132
2012	[16433] TAGLIANI S. (2012)	ETNA/SICILY / ELLITTICO SEQUENCE///	14.87	37.65	30.44	VOLCANIC ROCK	BENMOREITE			QUATERNARY		57.92	0.858842	34.0312	38.2376	0.0596878	1.38	17.41		6.77	6.593	0.5	5.4	2.29	0.16	2.15	4.94	0.68	0.33		14		117			11						65	1089	32	375	100	0.6	1239	131
2012	[16433] TAGLIANI S. (2012)	ETNA/SICILY / ELLITTICO SEQUENCE///	14.87	37.65	30.44	VOLCANIC ROCK	BENMOREITE			QUATERNARY		58.79	0.882702	34.5625	37.7418	0.0551537	1.38	17.69		6.39	6.351	0.6	5.46	2.16	0.16	2.14	4.74	0.68	0.34		14		111			11						61	1106	32	380	102	1.4	1222	129
2012	[16433] TAGLIANI S. (2012)	ETNA/SICILY / ELLITTICO SEQUENCE///	14.87	37.65	30.44	VOLCANIC ROCK	BENMOREITE			QUATERNARY		58.3	0.872455	34	38.1651	0.0560662	1.39	17.57		5.9	6.44	1.13	5.35	2.23	0.16	2.02	5	0.69	0.18		15		110			11						61	1088	32	381	99	1.1	1227	127
2012	[16433] TAGLIANI S. (2012)	ETNA/SICILY / ELLITTICO SEQUENCE///	14.87	37.65	30.44	VOLCANIC ROCK	BENMOREITE			QUATERNARY		57.23	0.845513	36.8667	36.5658	0.0542495	1.42	17.78		5.1	6.71	2.12	5.35	2.17	0.17	2.28	5.37	0.63	0.21		13		103			11						60	1106	30	365	97	0.8	1231	126
2012	[16433] TAGLIANI S. (2012)	ETNA/SICILY / ELLITTICO SEQUENCE///	14.87	37.65	30.44	VOLCANIC ROCK	BENMOREITE			QUATERNARY		56.76	0.821372	34.125	37.7037	0.0567766	1.44	17.8		6.12	6.538	1.03	5.84	2.22	0.16	2.4	5.14	0.64	0.23		14		108			11						62	1092	32	385	102	1.1	1239	126
2012	[16433] TAGLIANI S. (2012)	ETNA/SICILY / ELLITTICO SEQUENCE///	14.87	37.65	30.44	VOLCANIC ROCK	BENMOREITE			QUATERNARY		56.75	0.815851	36.0968	38.2297	0.0509383	1.44	17.84		3.96	6.624	3.06	5.57	2.3	0.16	2.32	5.61	0.65	0.39		12		98			11						57	1119	31	350	97	0.6	1239	126
2012	[16433] TAGLIANI S. (2012)	ETNA/SICILY / ELLITTICO SEQUENCE///	14.87	37.65	30.44	VOLCANIC ROCK	BENMOREITE			QUATERNARY		57.27	0.803862	33.9062	38.0178	0.0552995	1.44	17.51		6.04	6.306	0.87	5.51	2.17	0.16	2.51	5.5	0.63	0.33		13		85			10						60	1085	32	353	98	1.4	1266	127
2012	[16433] TAGLIANI S. (2012)	ETNA/SICILY / ELLITTICO SEQUENCE///	14.87	37.65	30.44	VOLCANIC ROCK	BENMOREITE			QUATERNARY		57.06	0.815755	34.1562	39.4599	0.0548948	1.47	17.78		5.95	6.235	0.88	5.48	2.28	0.17	2.36	5.64	0.65	0.31		12		93			10						60	1093	32	367	100	1.1	1269	124
2012	[16433] TAGLIANI S. (2012)	ETNA/SICILY / ELLITTICO SEQUENCE///	14.87	37.65	30.44	VOLCANIC ROCK	BENMOREITE			QUATERNARY		57.01	0.840787	34.5625	38.1126	0.0542495	1.45	17.82		6.52	6.628	0.76	5.51	2.29	0.76	2.21	5.34	0.68	0.28		13		103			11						60	1106	32	375	97	1.8	1242	125
2012	[16433] TAGLIANI S. (2012)	ETNA/SICILY / ELLITTICO SEQUENCE///	14.87	37.65	30.44	VOLCANIC ROCK	BENMOREITE			QUATERNARY		57.49	0.866113	33.1515	36.137	0.0521024	1.45	17.71		5.63	6.867	1.8	5.34	2.18	1.8	2.14	5.12	0.66	0.33		14		110			11						57	1094	33	389	101	1.1	1237	130
2012	[16433] TAGLIANI S. (2012)	ETNA/SICILY / ELLITTICO SEQUENCE///	14.87	37.65	30.44	VOLCANIC ROCK	BENMOREITE			QUATERNARY		57.64	0.847168	34.9688	37.5906	0.0536193	1.42	17.66		6.7	6.54	0.51	5.42	2.21	0.51	2.1	5.3	0.69	0.37		14		102			11						60	1119	32	383	101	1.1	1238	125
2012	[16433] TAGLIANI S. (2012)	ETNA/SICILY / ELLITTICO SEQUENCE///	14.87	37.65	30.44	VOLCANIC ROCK	BENMOREITE			QUATERNARY		57.42	0.850947	37.8667	37.4468	0.0536972	1.39	17.79		6.3	6.61	0.94	5.42	2.22	0.94	2.11	5.33	0.67	0.27		13		103			11						61	1136	30	366	99	0.7	1215	126
2012	[16433] TAGLIANI S. (2012)	ETNA/SICILY / ELLITTICO SEQUENCE///	14.87	37.65	30.44	VOLCANIC ROCK	BENMOREITE			QUATERNARY		58.18	0.854345	35.125	37.127	0.0498221	1.39	17.55		6.31	6.369	0.69	5.36	2.11	0.69	2.3	5.05	0.66	0.26		14		108			10						56	1124	32	381	98	0.9	1263	127
2012	[16433] TAGLIANI S. (2012)	ETNA/SICILY / ELLITTICO SEQUENCE///	14.87	37.65	30.44	VOLCANIC ROCK	BENMOREITE			QUATERNARY		57.6	0.826183	29.8286	38.3644	0.0507663	1.4	17.4		7	6.3		5.3	2.2	0.2	2.5	5.3	0.7	0.26		13		113			10						53	1044	35	343	88	0.9	1194	112
2012	[16433] TAGLIANI S. (2012)	ETNA/SICILY / ELLITTICO SEQUENCE///	14.87	37.65	30.44	VOLCANIC ROCK	BENMOREITE			QUATERNARY		58.09	0.864694	26.3235	32.9284	0.0759777	1.47	16.6		4.7	8.06	3.83	4.41	2.22	0.19	2.38	5.23	0.7	0.42		15		113			12						68	895	34	414	107	0.7	1324	138
2012	[16433] TAGLIANI S. (2012)	ETNA/SICILY / ELLITTICO SEQUENCE///	14.87	37.65	30.44	VOLCANIC ROCK	BENMOREITE			QUATERNARY		60.16	0.844178	11.9773	40.761	0.155598	1.41	15.63		5.47	6.243	1.32	3.23	2.41	0.21	3.23	5.56	0.56	0.71		13		66			12						82	527	44	619	133	0.5	1366	156
2012	[16433] TAGLIANI S. (2012)	ETNA/SICILY / ELLITTICO SEQUENCE///	14.87	37.65	30.44	VOLCANIC ROCK	BENMOREITE			QUATERNARY		58.56	0.842029	19	29.6117	0.114286	1.33	15.44		2.94	9.406	6.76	3.39	2.22	0.5	3.07	5.38	0.52	0.21		13		83			15						76	665	35	574	114	0.6	1319	149
2012	[16433] TAGLIANI S. (2012)	ETNA/SICILY / ELLITTICO SEQUENCE///	14.87	37.65	30.44	VOLCANIC ROCK	BENMOREITE			QUATERNARY		57.2	0.840914	35.2903	37.281	0.0621572	1.41	17.51		6.83	6.657	0.51	5.43	2.22	0.51	2.32	5.13	0.67	0.64		14		101			11						68	1094	31	379	102	2.5	1227	127
1988	[3185] FUJINAWA A. (1988)	HONSHU ARC / NORTHEASTERN HONSHU ARC / HONSHU / ADATARA / ADATARAYAMA LAVA FLOW/	140.28	37.62	28.52	VOLCANIC ROCK	BASALT, CALC-ALKALINE			QUATERNARY		57.28	0.869311	9.04762	41.9065	0.14251	0.95	16.68		4	8.5	4.9	7.49	3.44	0.14	1.24	2.57	0.18			24.1			19.6		25.2	9.7		105			35.2	247	27.3	101	4.9	0.39	274
1988	[3185] FUJINAWA A. (1988)	HONSHU ARC / NORTHEASTERN HONSHU ARC / HONSHU / ADATARA / CHOSHIGATAKI FLOW/	140.28	37.62	28.52	VOLCANIC ROCK	BASALT, THOLEIITIC			QUATERNARY		56.85	0.970083	9.34307	41.6911	0.0484375	0.89	18.97		4.22	7.728	3.93	8.07	3.1	0.12	0.59	2.58	0.2			24.1		160	28.2		19.1	7.5		66			12.4	256	27.4	75.6	6.5		153
1988	[3185] FUJINAWA A. (1988)	HONSHU ARC / NORTHEASTERN HONSHU ARC / HONSHU / ADATARA / ISHIMUSHIRO-GENRYU FLOW/	140.28	37.62	28.52	VOLCANIC ROCK	BASALT, THOLEIITIC			QUATERNARY		61.74	0.878696	8.14371	29.9107	0.05625	0.99	15.73		3.43	7.727	4.64	6.2	1.85	0.1	0.79	3.51	0.27			25.6		93	4.5		13.6	3.8		84			15.3	272	33.4	89.1	6.8	0.26	212
1988	[3185] FUJINAWA A. (1988)	HONSHU ARC / NORTHEASTERN HONSHU ARC / HONSHU / ADATARA / KAGOYAMA LAVA FLOW/	140.28	37.62	28.52	VOLCANIC ROCK	BASALT, CALC-ALKALINE			QUATERNARY		60.11	0.974131	7.37201	41.9648	0.209259	0.85	16.34		3.91	7.469	3.95	5.77	3.03	0.14	1.58	2.78	0.17			21.4		168	18.4		20	5.5		63			45.2	216	29.3	128	5.4	1.4	357
1988	[3185] FUJINAWA A. (1988)	HONSHU ARC / NORTHEASTERN HONSHU ARC / HONSHU / ADATARA / NUMANOTAIRA LAVA FLOW/	140.28	37.62	28.52	VOLCANIC ROCK	BASALT, CALC-ALKALINE			QUATERNARY		57.72	0.944359	8.5348	42.7781	0.161803	0.95	16.56		4.72	8.488	4.24	6.65	3.56	0.13	1.14	2.56	0.21			24.1		205	21.7		23.7	6.9		95			37.7	233	27.3	109	4.6	0.58	285
1988	[3185] FUJINAWA A. (1988)	HONSHU ARC / NORTHEASTERN HONSHU ARC / HONSHU / ADATARA / SHIRAITO LAVA FLOW/	140.28	37.62	28.52	VOLCANIC ROCK	BASALT, CALC-ALKALINE			QUATERNARY		60.17	0.957486	7.60656	44.8602	0.194397	0.84	17.39		3.74	6.726	3.36	6.78	3.07	0.13	1.47	2.58	0.16			19.1		195	26.8		20.6	10.2		82			45.1	232	30.5	124	5.6	1.11	327
1988	[3185] FUJINAWA A. (1988)	HONSHU ARC / NORTHEASTERN HONSHU ARC / HONSHU / ADATARA / YAHAZUMORI PYROCLASTIC FALL/	140.28	37.62	28.52	VOLCANIC ROCK	BASALT, CALC-ALKALINE			QUATERNARY		61	0.984431	6.81957	39.0704	0.197309	0.88	16.82		4.42	6.838	2.86	5.94	2.46	0.11	1.37	2.92	0.16			19.2		153	14.4		16.7	3		49			44	223	32.7	132	7.5	0.99	344
1988	[3185] FUJINAWA A. (1988)	HONSHU ARC / NORTHEASTERN HONSHU ARC / HONSHU / ADATARA / YAKUSHIDAKE FLOW/	140.28	37.62	28.52	VOLCANIC ROCK	BASALT, CALC-ALKALINE			QUATERNARY		60.75	0.888019	7.56849	41.1013	0.21991	0.83	15.97		4.37	7.203	3.27	6.34	2.82	0.09	1.71	2.8	0.15			22.1		163	28.3		20.2	8.2		61			48.6	221	29.2	134	5.6	1.09	383
1988	[3185] FUJINAWA A. (1988)	HONSHU ARC / NORTHEASTERN HONSHU ARC / HONSHU / ADATARA / YAKUSHIDAKE-SHITA FLOW/	140.28	37.62	28.52	VOLCANIC ROCK	BASALT, THOLEIITIC			QUATERNARY		56.6	0.978209	9.03114	41.7879	0.0337165	0.99	18.6		3.94	8.616	5.07	7.72	3.47	0.15	0.42	2.75	0.2			29		178	23.3		22.8	4.6		70			8.8	261	28.9	65.2	5.9		145
1984	[4072] YOSHIDA T. (1984)	HONSHU ARC / NORTHEASTERN HONSHU ARC / HONSHU / AZUMA//	140	37.8	28.52	VOLCANIC ROCK	ANDESITE, OLIVINE-AUGITE-HYPERSTHENE			QUATERNARY		63.86	0.859874	7.25275	43.5462	0.335354	0.73	15.05		2.02	6.008	4.19	5.81	2.6	0.11	2.11	2.83	0.07			21.4			38.3		17.9	16.1		59			66.4	198	27.3	150	5.8	3.45	366
2001	[5109] KIMURA J.-I. (2001)	HONSHU ARC / NORTHEASTERN HONSHU ARC / HONSHU / NEKOMA / BABASHINDEN PYROCLASTIC FLOW/	140	37.8	28.52	VOLCANIC ROCK	ANDESITE			QUATERNARY		58.94	0.890436	8.25714	38.0319	0.0346021	0.88	16.77	9.1				7.04	2.82	0.19	0.62	3.26	0.17					195	8		25	2			18		10	289	35	106	4		222
2001	[5109] KIMURA J.-I. (2001)	HONSHU ARC / NORTHEASTERN HONSHU ARC / HONSHU / NEKOMA / BABASHINDEN PYROCLASTIC FLOW/	140	37.8	28.52	VOLCANIC ROCK	ANDESITE			QUATERNARY		59.82	0.940353	8.38235	34.7119	0.0385965	0.92	16.85	8.94				6.39	2.4	0.17	0.73	3.35	0.22					204	11		26	2			18		11	285	34	105	5		203
2001	[5109] KIMURA J.-I. (2001)	HONSHU ARC / NORTHEASTERN HONSHU ARC / HONSHU / NEKOMA / GENBASHI LAVA/	140	37.8	28.52	VOLCANIC ROCK	ANDESITE			QUATERNARY		57.34	0.858239	10.7407	39.565	0.0344828	0.93	17.04	9.62				7.8	3.18	0.18	0.53	3.1	0.17					220	22		28	2			18		10	290	27	94	5		162
2001	[5109] KIMURA J.-I. (2001)	HONSHU ARC / NORTHEASTERN HONSHU ARC / HONSHU / NEKOMA / GENBASHI LAVA/	140	37.8	28.52	VOLCANIC ROCK	ANDESITE			QUATERNARY		65.44	0.944809	6.83721	30.9557	0.0680272	0.76	16.24	5.61				5.05	1.27	0.17	1.06	4.17	0.28					43	3		13	3			19		20	294	43	134	7		292
2001	[5109] KIMURA J.-I. (2001)	HONSHU ARC / NORTHEASTERN HONSHU ARC / HONSHU / NEKOMA / GOLD-LINE PYROCLASTIC FLOW/	140	37.8	28.52	VOLCANIC ROCK	ANDESITE			QUATERNARY		58.35	0.878455	10.32	44.5055	0.0930233	0.84	16.22	9.31				7.06	3.77	0.16	0.99	2.77	0.12					219	33		29	11			17		24	258	25	114	5		264
2001	[5109] KIMURA J.-I. (2001)	HONSHU ARC / NORTHEASTERN HONSHU ARC / HONSHU / NEKOMA / HOTTAI LAVA FLOW/	140	37.8	28.52	VOLCANIC ROCK	ANDESITE			QUATERNARY		60.14	0.926837	9.44118	31.5545	0.046729	0.98	17.19	8.42				6.57	1.96	0.16	0.78	3.5	0.25					116	6		19				17		15	321	34	157	6		257
2001	[5109] KIMURA J.-I. (2001)	HONSHU ARC / NORTHEASTERN HONSHU ARC / HONSHU / NEKOMA / HOTTAI LAVA FLOW/	140	37.8	28.52	VOLCANIC ROCK	ANDESITE			QUATERNARY		59.8	0.881349	9.85294	32.4113	0.038806	0.96	17.27	8.26				7.11	2	0.17	0.75	3.56	0.24					124	4		21	1			18		13	335	34	128	6		233
2001	[5109] KIMURA J.-I. (2001)	HONSHU ARC / NORTHEASTERN HONSHU ARC / HONSHU / NEKOMA / HOTTAI LAVA FLOW/	140	37.8	28.52	VOLCANIC ROCK	ANDESITE			QUATERNARY		65.75	0.923194	7.60526	28.178	0.0622837	0.79	15.46	6.31				5.08	1.25	0.16	0.92	3.96	0.25					46	2		11	1			18		18	289	38	150	6		297
2001	[5109] KIMURA J.-I. (2001)	HONSHU ARC / NORTHEASTERN HONSHU ARC / HONSHU / NEKOMA / HUTAGOYAMA LAVA/	140	37.8	28.52	VOLCANIC ROCK	ANDESITE			QUATERNARY		64.5	0.95256	8.70588	31.1076	0.0574324	0.87	15.84	6.93				5.22	1.58	0.14	0.85	3.78	0.24					49	7		15	3			19		17	296	34	130	6		253
2001	[5109] KIMURA J.-I. (2001)	HONSHU ARC / NORTHEASTERN HONSHU ARC / HONSHU / NEKOMA / HUTAGOYAMA LAVA/	140	37.8	28.52	VOLCANIC ROCK	ANDESITE			QUATERNARY		65.12	0.990811	8.64706	31.0271	0.0612245	0.85	15.84	6.78				4.87	1.54	0.12	0.86	3.77	0.24					43	3		12	1			18		18	294	34	132	6		265
2001	[5109] KIMURA J.-I. (2001)	HONSHU ARC / NORTHEASTERN HONSHU ARC / HONSHU / NEKOMA / ICHINOIWA LAVA/	140	37.8	28.52	VOLCANIC ROCK	ANDESITE			QUATERNARY		62.24	0.884421	6.2449	31.2027	0.0457516	0.85	16.12	7.86				6.27	1.8	0.16	0.76	3.65	0.21					127	4		19	2			19		14	306	49	123	5		236
2001	[5109] KIMURA J.-I. (2001)	HONSHU ARC / NORTHEASTERN HONSHU ARC / HONSHU / NEKOMA / ISHIO LAVA/	140	37.8	28.52	VOLCANIC ROCK	ANDESITE			QUATERNARY		58.87	0.841422	9.29032	40.2402	0.0451389	0.88	16.17	9				7.18	3.06	0.17	0.77	3.24	0.19					207	23		26	7			18		13	288	31	132	5		248
2001	[5109] KIMURA J.-I. (2001)	HONSHU ARC / NORTHEASTERN HONSHU ARC / HONSHU / NEKOMA / ISHIO LAVA/	140	37.8	28.52	VOLCANIC ROCK	ANDESITE			QUATERNARY		58.57	0.81892	9.09677	41.2117	0.0460993	0.9	15.84	9.21				7.3	3.26	0.18	0.76	3.19	0.19					209	25		27	8			18		13	282	31	130	5		240
2001	[5109] KIMURA J.-I. (2001)	HONSHU ARC / NORTHEASTERN HONSHU ARC / HONSHU / NEKOMA / KANAZAWATOGE LAVA/	140	37.8	28.52	VOLCANIC ROCK	ANDESITE			QUATERNARY		62.85	0.916435	7.06667	32.6633	0.0220126	0.8	16.74	6.9				6.27	1.69	0.16	0.66	3.74	0.23					101	3		18	2			19		7	318	45	126	5		252
2001	[5109] KIMURA J.-I. (2001)	HONSHU ARC / NORTHEASTERN HONSHU ARC / HONSHU / NEKOMA / KANAZAWATOGE LAVA/	140	37.8	28.52	VOLCANIC ROCK	ANDESITE			QUATERNARY		66.62	0.998981	8.05405	25.7961	0.0637584	0.69	16.17	5.64				4.7	0.99	0.13	0.95	4.02	0.22					31	6		11	1			18		19	298	37	153	6		287
2001	[5109] KIMURA J.-I. (2001)	HONSHU ARC / NORTHEASTERN HONSHU ARC / HONSHU / NEKOMA / KOJOGAMINE LAVA/	140	37.8	28.52	VOLCANIC ROCK	ANDESITE			QUATERNARY		58.21	0.994733	10.8077	39.1545	0.0355872	0.94	17.29	9.91				6.57	3.22	0.19	0.6	2.91	0.18					220	18		27	2			19		10	281	26	98	5		185
2001	[5109] KIMURA J.-I. (2001)	HONSHU ARC / NORTHEASTERN HONSHU ARC / HONSHU / NEKOMA / MITSUISHIYAMA LAVA/	140	37.8	28.52	VOLCANIC ROCK	ANDESITE			QUATERNARY		59.14	0.894572	9.59259	42.9995	0.0965251	0.92	16.02	9.32				6.67	3.55	0.17	1.04	2.83	0.15					204	18		28	8			17		25	259	27	105	5		245
2001	[5109] KIMURA J.-I. (2001)	HONSHU ARC / NORTHEASTERN HONSHU ARC / HONSHU / NEKOMA / NAKADOUJI LAVA/	140	37.8	28.52	VOLCANIC ROCK	ANDESITE			QUATERNARY		63.17	0.942588	8.8	30.3692	0.0454545	0.81	16.56	7.22				5.86	1.59	0.17	0.78	3.69	0.23					97	4		15	1			19		14	308	35	126	6		236
2001	[5109] KIMURA J.-I. (2001)	HONSHU ARC / NORTHEASTERN HONSHU ARC / HONSHU / NEKOMA / NAKADOUJI LAVA/	140	37.8	28.52	VOLCANIC ROCK	ANDESITE			QUATERNARY		64.08	0.983753	8.75	30.0438	0.047619	0.74	16.96	6.41				5.58	1.39	0.16	0.81	3.78	0.24					74	4		13	1			19		15	315	36	132	5		269
2001	[5109] KIMURA J.-I. (2001)	HONSHU ARC / NORTHEASTERN HONSHU ARC / HONSHU / NEKOMA / NAKANO LAVA/	140	37.8	28.52	VOLCANIC ROCK	ANDESITE			QUATERNARY		59.94	0.878706	9.875	35.1164	0.0411392	0.89	16.78	8.27				6.92	2.26	0.17	0.73	3.48	0.22					137	8		21	2			18		13	316	32	126	5		266
2001	[5109] KIMURA J.-I. (2001)	HONSHU ARC / NORTHEASTERN HONSHU ARC / HONSHU / NEKOMA / NAKANO LAVA/	140	37.8	28.52	VOLCANIC ROCK	ANDESITE			QUATERNARY		57.76	0.864619	11	37.1218	0.030303	0.93	17.06	9.46				7.72	2.82	0.19	0.52	3.12	0.18					205	16		25				19		9	297	27	95	4		193
2001	[5109] KIMURA J.-I. (2001)	HONSHU ARC / NORTHEASTERN HONSHU ARC / HONSHU / NEKOMA / NEKOMADAKE LAVA/	140	37.8	28.52	VOLCANIC ROCK	ANDESITE			QUATERNARY		61.48	0.983107	7.21875	41.4973	0.112554	0.88	16.01	8.46				5.92	3.03	0.14	1.15	2.6	0.16					201	16		33	9			17		26	231	32	111	5		289
2001	[5109] KIMURA J.-I. (2001)	HONSHU ARC / NORTHEASTERN HONSHU ARC / HONSHU / NEKOMA / OGUNINUMA-HIGASHI LAVA/	140	37.8	28.52	VOLCANIC ROCK	ANDESITE			QUATERNARY		59.35	0.982051	10.5357	37.9978	0.0610169	0.95	17.13	8.79				6.06	2.72	0.2	0.86	3.34	0.26					100	6		22	2			18		18	295	28	114	6		244
2001	[5109] KIMURA J.-I. (2001)	HONSHU ARC / NORTHEASTERN HONSHU ARC / HONSHU / NEKOMA / OGUNITAKI LAVA/	140	37.8	28.52	VOLCANIC ROCK	ANDESITE			QUATERNARY		57.84	0.866122	10.3226	40.7756	0.03125	0.94	16.81	9.32				7.32	3.24	0.19	0.62	3.3	0.19					173	5		24	5			18		10	320	31	115	5		191
2001	[5109] KIMURA J.-I. (2001)	HONSHU ARC / NORTHEASTERN HONSHU ARC / HONSHU / NEKOMA / OGUNITAKI LAVA/	140	37.8	28.52	VOLCANIC ROCK	ANDESITE			QUATERNARY		61.07	0.885682	8.45946	32.6797	0.0511182	1.06	15.88	8.69				6.02	2.13	0.17	0.86	3.68	0.32					111	6		23	3			18		16	313	37	150	6		266
2001	[5109] KIMURA J.-I. (2001)	HONSHU ARC / NORTHEASTERN HONSHU ARC / HONSHU / NEKOMA / OKUBO PYROCLASTIC FLOW/	140	37.8	28.52	VOLCANIC ROCK	ANDESITE			QUATERNARY		64.71	0.980378	7.85	28.0468	0.0573248	0.93	15.93	6.91				4.78	1.36	0.16	1.01	3.93	0.33					49	5		15				17		18	314	40	187	8		324
2001	[5109] KIMURA J.-I. (2001)	HONSHU ARC / NORTHEASTERN HONSHU ARC / HONSHU / NEKOMA / OSHISAWA LAVA/	140	37.8	28.52	VOLCANIC ROCK	ANDESITE			QUATERNARY		58.76	0.889006	11.2692	44.3838	0.0716724	0.87	16.69	8.81				6.91	3.55	0.18	0.92	3.17	0.2					160	51		25	15			17		21	293	26	106	5		252
2001	[5109] KIMURA J.-I. (2001)	HONSHU ARC / NORTHEASTERN HONSHU ARC / HONSHU / NEKOMA / OUGIGAMINE PYROCLASTIC FLOW/	140	37.8	28.52	VOLCANIC ROCK	ANDESITE			QUATERNARY		58.95	0.868374	8.97059	37.2203	0.042623	0.9	16.25	9.32				6.95	2.79	0.18	0.66	3.26	0.18					171	11		23	2			18		13	305	34	121	5		263
2001	[5109] KIMURA J.-I. (2001)	HONSHU ARC / NORTHEASTERN HONSHU ARC / HONSHU / NEKOMA / OUGIGAMINE PYROCLASTIC FLOW/	140	37.8	28.52	VOLCANIC ROCK	ANDESITE			QUATERNARY		64.2	0.937891	8.7027	32.3822	0.0559006	0.86	16.32	6.41				5.28	1.55	0.18	0.9	4.15	0.25					59	9		13	1			19		18	322	37	141	6		286
2001	[5109] KIMURA J.-I. (2001)	HONSHU ARC / NORTHEASTERN HONSHU ARC / HONSHU / NEKOMA / OUTAKI LAVA/	140	37.8	28.52	VOLCANIC ROCK	ANDESITE			QUATERNARY		57.67	0.929615	10.0312	39.5717	0.0280374	1	16.93	9.95				6.87	3.29	0.19	0.62	3.07	0.19					200	7		28	3			17		9	321	32	114	5		202
2001	[5109] KIMURA J.-I. (2001)	HONSHU ARC / NORTHEASTERN HONSHU ARC / HONSHU / NEKOMA / OUTAKI LAVA/	140	37.8	28.52	VOLCANIC ROCK	ANDESITE			QUATERNARY		57.46	0.893329	9.96875	40.862	0.0282132	0.97	16.78	9.86				7.13	3.44	0.2	0.59	3.15	0.18					188	9		28	4			18		9	319	32	110	5		196
2001	[5109] KIMURA J.-I. (2001)	HONSHU ARC / NORTHEASTERN HONSHU ARC / HONSHU / NEKOMA / SAIREN LAVA/	140	37.8	28.52	VOLCANIC ROCK	ANDESITE			QUATERNARY		57.61	0.857074	10.6786	38.4352	0.0301003	0.92	17.32	9.39				7.88	2.96	0.19	0.54	3.22	0.18					216	16		26	1			18		9	299	28	94	5		171
2001	[5109] KIMURA J.-I. (2001)	HONSHU ARC / NORTHEASTERN HONSHU ARC / HONSHU / NEKOMA / SHIMIZUSAWA PYROCLASTIC FLOW/	140	37.8	28.52	VOLCANIC ROCK	ANDESITE			QUATERNARY		61.05	0.941445	8.39474	32.2679	0.0470219	1.08	16.22	8.73				5.74	2.1	0.18	0.85	3.57	0.32					114	7		20	1			17		15	319	38	156	7		282
2001	[5109] KIMURA J.-I. (2001)	HONSHU ARC / NORTHEASTERN HONSHU ARC / HONSHU / NEKOMA / SHIMIZUSAWA PYROCLASTIC FLOW/	140	37.8	28.52	VOLCANIC ROCK	ANDESITE			QUATERNARY		58.26	0.908157	9.65714	34.6818	0.0207101	1.02	17.89	8.84				7.38	2.37	0.18	0.56	3.45	0.24					143	6		24	1			18		7	338	35	131	5		241
2001	[5109] KIMURA J.-I. (2001)	HONSHU ARC / NORTHEASTERN HONSHU ARC / HONSHU / NEKOMA / TAKINOSAWA LAVA/	140	37.8	28.52	VOLCANIC ROCK	ANDESITE			QUATERNARY		62.72	0.90363	7.63415	30.2514	0.0543131	0.9	16.14	7.58				5.85	1.66	0.14	0.9	3.8	0.25					85	7		15	3			17		17	313	41	151	6		301
2001	[5109] KIMURA J.-I. (2001)	HONSHU ARC / NORTHEASTERN HONSHU ARC / HONSHU / NEKOMA / UMAYAMA LAVA/	140	37.8	28.52	VOLCANIC ROCK	ANDESITE			QUATERNARY		57.71	0.886646	10.0588	36.2935	0.0263158	0.98	17.71	8.83				7.52	2.54	0.19	0.67	3.39	0.24					151	10		24	3			18		9	342	34	119	5		275
2001	[5109] KIMURA J.-I. (2001)	HONSHU ARC / NORTHEASTERN HONSHU ARC / HONSHU / NEKOMA / UMAYAMA LAVA/	140	37.8	28.52	VOLCANIC ROCK	ANDESITE			QUATERNARY		64.59	0.952981	7.15909	26.8621	0.0571429	0.94	15.8	7.01				4.98	1.3	0.17	1.01	3.91	0.33					46	5		15	3			17		18	315	44	186	8		324
2001	[5109] KIMURA J.-I. (2001)	HONSHU ARC / NORTHEASTERN HONSHU ARC / HONSHU / NEKOMA / UMAYAYAMA-MINAMI PYROCLASTIC FLOW/	140	37.8	28.52	VOLCANIC ROCK	ANDESITE			QUATERNARY		57.43	0.91001	14.6207	39.3359	0.0400943	0.92	17.49	9.56				7.52	3.13	0.19	0.52	3.03	0.17					233	334		35	102			18		17	424	29	127	6		160
2001	[5109] KIMURA J.-I. (2001)	HONSHU ARC / NORTHEASTERN HONSHU ARC / HONSHU / NEKOMA / UMAYAYAMA-MINAMI PYROCLASTIC FLOW/	140	37.8	28.52	VOLCANIC ROCK	ANDESITE			QUATERNARY		56.78	0.931917	14.6207	39.4872	0.0400943	0.91	18.12	9.53				7.77	3.14	0.19	0.52	2.89	0.17					233	334		35	102			18		17	424	29	127	6		161
2001	[5109] KIMURA J.-I. (2001)	HONSHU ARC / NORTHEASTERN HONSHU ARC / HONSHU / NEKOMA//	140	37.8	28.52	VOLCANIC ROCK	ANDESITE			QUATERNARY		62.34	0.819799	8.18421	34.5605	0.0578778	0.84	15.96	7.05				6.64	1.88	0.18	0.86	3.93	0.23					94	6		17	2			18		18	311	38	136	6		287
2001	[5109] KIMURA J.-I. (2001)	HONSHU ARC / NORTHEASTERN HONSHU ARC / HONSHU / NEKOMA//	140	37.8	28.52	VOLCANIC ROCK	ANDESITE			QUATERNARY		63.5	0.933593	7.94737	33.8943	0.0596026	0.88	16.09	7.03				5.46	1.82	0.16	0.9	3.85	0.25					108	10		18	0			18		18	302	38	144	6		279
1990	[3409] SHUTO K. (1990)	HONSHU ARC / NORTHEASTERN HONSHU ARC / HONSHU / OHNAGURAYAMA//	140.2	37.7	28.52	VOLCANIC ROCK	ANDESITE, AUGITE-HYPERSTHENE-PLAGIOCLASE			PLIOCENE		56.09	0.866899	6.13158	33.132	0.0716738	1.06	17.35		3.11	9.569	6.77	8.63	2.66	0.17	0.59	2.24	0.15						8			5					16.7	233	38	65	3.7
1990	[3409] SHUTO K. (1990)	HONSHU ARC / NORTHEASTERN HONSHU ARC / HONSHU / OHNAGURAYAMA//	140.2	37.7	28.52	VOLCANIC ROCK	ANDESITE, AUGITE-HYPERSTHENE-PLAGIOCLASE			PLIOCENE		57.34	0.863307	8.52	35.4075	0.109859	0.92	16.74		3.03	9.007	6.28	8.03	2.77	0.15	0.87	2.34	0.12						9			8					23.4	213	25	61	4.9
1990	[3409] SHUTO K. (1990)	HONSHU ARC / NORTHEASTERN HONSHU ARC / HONSHU / OHNAGURAYAMA//	140.2	37.7	28.52	VOLCANIC ROCK	ANDESITE, AUGITE-HYPERSTHENE-PLAGIOCLASE			PLIOCENE		56.97	0.853542	9.07692	29.9607	0.0851695	0.98	17.43		2.68	9.542	7.13	8.67	2.29	0.18	0.61	2.43	0.18									4					20.1	236	26	61	5.8
1990	[3409] SHUTO K. (1990)	HONSHU ARC / NORTHEASTERN HONSHU ARC / HONSHU / OHNAGURAYAMA//	140.2	37.7	28.52	VOLCANIC ROCK	ANDESITE, AUGITE-HYPERSTHENE-PLAGIOCLASE			PLIOCENE		57.63	0.851909	9.56	30.211	0.0631799	1	17.05		2.25	9.635	7.61	8.47	2.34	0.18	0.57	2.43	0.18						9			4					15.1	239	25	64	5.3
1990	[3409] SHUTO K. (1990)	HONSHU ARC / NORTHEASTERN HONSHU ARC / HONSHU / OHNAGURAYAMA//	140.2	37.7	28.52	VOLCANIC ROCK	ANDESITE, AUGITE-HYPERSTHENE-PLAGIOCLASE			PLIOCENE		57.22	0.866458	6.61111	27.4814	0.0718487	0.96	16.92			10.63		8.15	2.26	0.18	0.78	2.35	0.18									4					17.1	238	36	64	4.5
1990	[3409] SHUTO K. (1990)	HONSHU ARC / NORTHEASTERN HONSHU ARC / HONSHU / SASAMORIYAMA//	140.2	37.7	28.52	VOLCANIC ROCK	ANDESITE, AUGITE-HYPERSTHENE-PLAGIOCLASE			PLIOCENE		57.04	0.920653	10.85	44.7633	0.135945	0.8	16.86			8.38		7.67	3.81	0.14	0.92	2.05	0.11						40			10					29.5	217	20	86	5.7
1990	[3409] SHUTO K. (1990)	HONSHU ARC / NORTHEASTERN HONSHU ARC / HONSHU / SASAMORIYAMA//	140.2	37.7	28.52	VOLCANIC ROCK	ANDESITE, HYPERSTHENE-AUGITE-PLAGIOCLASE			PLIOCENE		58.84	0.905132	8.79167	44.8331	0.183412	0.74	16.51			7.83		7.27	3.57	0.15	1.16	2.29	0.11						44			11					38.7	211	24	95	5.7
1992	[6431] BLACK P. M. (1992)	NEW ZEALAND / NORTH ISLAND / NORTHLAND VOLCANIC ZONE / KIWITAHI VOLCANIC CHAIN - PUKEKAMAKA//	175.4	-37.3	27.5	VOLCANIC ROCK	ANDESITE, HORNBLENDE			MIOCENE		60.16	0.957257	24.1053	39.2544	0.0851528	0.56	19.13		1.3	5.82	4.65	7.24	2.11	0.13	1.18	3.37	0.16	2.23			13		134	5			3	39	458	19		39	458	19	113	3		380
2010	[14571] BOODEN M. A. (2010)	NEW ZEALAND / NORTH ISLAND / NORTHLAND VOLCANIC ZONE / KIWITAHI VOLCANIC CHAIN - PUKEKAMAKA//	175.4	-37.3	27.5	VOLCANIC ROCK	ANDESITE	10000000	15000000	MIOCENE		59.89	0.945292	26.1798	37.1429	0.083691	0.57	18.87		1.66	6.244	4.75	7.3	2.07	0.14	1.15	3.31	0.17				10.2		124			20.6	2.2	30.4	74	25		39	466	17.8	113	3.6	1.61	257
2010	[14571] BOODEN M. A. (2010)	NEW ZEALAND / NORTH ISLAND / NORTHLAND VOLCANIC ZONE / KIWITAHI VOLCANIC CHAIN - PUKEKAMAKA//	175.4	-37.3	27.5	VOLCANIC ROCK	ANDESITE	10000000	15000000	MIOCENE		60.15	0.940105	17.2803	40.6955	0.0968523	0.59	18.41		1.66	6.234	4.74	6.9	2.4	0.12	1.35	3.39	0.16				14.3		142	6		22.2	5	35.5	76	25		40	413	23.9	108	3.5	0.69	291
2010	[14571] BOODEN M. A. (2010)	NEW ZEALAND / NORTH ISLAND / NORTHLAND VOLCANIC ZONE / KIWITAHI VOLCANIC CHAIN - PUKEKAMAKA//	175.4	-37.3	27.5	VOLCANIC ROCK	ANDESITE	10000000	15000000	MIOCENE		60.32	0.959195	34.0602	35.5108	0.0816777	0.57	18.8		1.65	6.215	4.73	7.08	1.92	0.14	1.2	3.3	0.17				10.8		124			27.6	2.4	32.5	74	24		37	453	13.3	110	3.5	1.89	272
1992	[7641] KUSCHEL E. (1992)	NEW ZEALAND / NORTH ISLAND / NORTHLAND VOLCANIC ZONE / KIWITAHI VOLCANIC CHAIN//	175.1	-37.7	27.5	VOLCANIC ROCK	ANDESITE, CALC-ALKALINE			NEOGENE		58.83	0.957201	22.05	39.2959	0.0839002	0.54	18.4		0.93	5.507	4.67	7.02	2	0.13	1.15	3.17	0.17	1.27					132	2			5	35	69			37	441	20	102			366
2020	[24407] SCHOENHOFEN M. V. (2020)	AEGEAN ARC / SOUTH AEGEAN VOLCANIC ARC / METHANA PENINSULA / METHANA//	23.333	37.619	24.55	VOLCANIC ROCK	ANDESITE			QUATERNARY		62.79	0.919306	21.4094	42.9057	0.267712	0.4	17.09	5.06				5.28	1.92	0.12	2.47	3.84	0.2	0.67	33	6.06		67.4	16.1		8.36	11.7	11.2	66.9	19.8		85.4	319	14.9	144	8.1	4.69	478	22.9
2020	[24407] SCHOENHOFEN M. V. (2020)	AEGEAN ARC / SOUTH AEGEAN VOLCANIC ARC / METHANA PENINSULA / METHANA//	23.356	37.59	24.55	VOLCANIC ROCK	ANDESITE			QUATERNARY		61.69	0.929302	13.5	43.0027	0.16532	0.55	17.4	5.88				6.09	2.24	0.14	1.78	3.48	0.16	0.43				92.5	7.6			2.9		72	14.6		49.1	297	22	145	8		413
2021	[25162] CUBUKCU H. E. (2021)	ANATOLIA-IRAN BELT - CENOZOIC/QUATERNARY / TURKEY / WESTERN ANATOLIAN VOLCANIC BELT / BODRUM CALDERA/	27	37	30	PLUTONIC ROCK	MICROMONZONITE			MIOCENE		57	0.87689	32.6151	41.9575	0.288754	0.81	18	6				4.03	2.19	0.13	6.8	3.55	0.22	1.35				89			20.1	6	35	71	22	25	286.3	991.5	30.4	692.1	60.9	17.4	1568.7	132.5
2021	[25162] CUBUKCU H. E. (2021)	ANATOLIA-IRAN BELT - CENOZOIC/QUATERNARY / TURKEY / WESTERN ANATOLIAN VOLCANIC BELT / BODRUM CALDERA/	27	37	30	VOLCANIC ROCK	TRACHYBASALT			MIOCENE		56.31	0.787198	45.6549	39.8509	0.176197	0.52	18.62	2.78				6.35	0.93	0.11	4.53	4.38	0.27	4.8				64			7	4	17	23	20.8	43	181.8	1031.8	22.6	218.6	25.9	7.9	1387	66
2021	[25162] CUBUKCU H. E. (2021)	ANATOLIA-IRAN BELT - CENOZOIC/QUATERNARY / TURKEY / WESTERN ANATOLIAN VOLCANIC BELT / BODRUM CALDERA/	27	37	30	VOLCANIC ROCK	TRACHYBASALT			MIOCENE		57.39	0.919528	41.2179	35.5474	0.151326	0.79	19.54	3.95				5.71	1.1	0.09	4.19	3.85	0.45	2.5				104			15.2	4.3	41.4	79	21.8	7.6	160.3	1059.3	25.7	368.9	29.1	7.5	1585	71.9
2021	[25162] CUBUKCU H. E. (2021)	ANATOLIA-IRAN BELT - CENOZOIC/QUATERNARY / TURKEY / WESTERN ANATOLIAN VOLCANIC BELT / BODRUM CALDERA/	27	37	30	VOLCANIC ROCK	TRACHYBASALT			MIOCENE		58.18	0.897477	39.364	34.9954	0.135585	0.73	17.51	6.07				5.1	1.65	0.08	4.2	3.46	0.4	2.2				132			24.4	7.8	21.1	60	20.5	2.8	139.3	1027.4	26.1	293.1	20.2	5.7	1473	80.8
2021	[25162] CUBUKCU H. E. (2021)	ANATOLIA-IRAN BELT - CENOZOIC/QUATERNARY / TURKEY / WESTERN ANATOLIAN VOLCANIC BELT / BODRUM CALDERA/	27	37	30	VOLCANIC ROCK	TRACHYBASALT			MIOCENE		57.16	0.859905	41.9782	36.8959	0.118243	0.77	17.45	5.86				5.3	1.73	0.15	4.42	3.57	0.42	2.7				110			14.8	18.5	14.1	31	18.6	1.7	136.5	1154.4	27.5	242.7	18.5	6.8	1572	100.9
2021	[25162] CUBUKCU H. E. (2021)	ANATOLIA-IRAN BELT - CENOZOIC/QUATERNARY / TURKEY / WESTERN ANATOLIAN VOLCANIC BELT / BODRUM CALDERA/	27	37	30	VOLCANIC ROCK	TRACHYBASALT			MIOCENE		59.5	0.816588	41.4689	31.0958	0.206415	0.48	15.8	6.1				4.81	1.39	0.11	4.31	3.61		3.26				69			15.2	6	12	45	17.8	2	178.9	866.7	20.9	189.6	17.5	11.7	1295.7	63.3
2021	[25162] CUBUKCU H. E. (2021)	ANATOLIA-IRAN BELT - CENOZOIC/QUATERNARY / TURKEY / WESTERN ANATOLIAN VOLCANIC BELT / BODRUM CALDERA/	27	37	30	VOLCANIC ROCK	TRACHYBASALT			MIOCENE		65.65	0.855078	42.7673	38.4668	0.284118	0.46	14.58	3.77				3.76	1.19	0.05	4.65	3.15	0.23	2.2				51			13	8.9	5.6	33	16.8	2.4	193.2	680	15.9	309.1	22.3	10.9	1005	50.3
2021	[25162] CUBUKCU H. E. (2021)	ANATOLIA-IRAN BELT - CENOZOIC/QUATERNARY / TURKEY / WESTERN ANATOLIAN VOLCANIC BELT / BODRUM CALDERA/	27	37	30	VOLCANIC ROCK	TRACHYBASALT			MIOCENE		57.68	0.78139	33.12	44.3803	0.222491	0.65	15.92	4.84				5.27	1.95	0.1	4.91	3.33	0.33	4.7				90			16.7	8.3	9.5	45	16	27.8	165.8	745.2	22.5	326.2	24.7	10.4	1201	62.8
2021	[25162] CUBUKCU H. E. (2021)	ANATOLIA-IRAN BELT - CENOZOIC/QUATERNARY / TURKEY / WESTERN ANATOLIAN VOLCANIC BELT / BODRUM CALDERA/	27	37	30	VOLCANIC ROCK	TRACHYBASALT			MIOCENE		57.3	0.832309	35.3993	41.1935	0.188047	0.91	17.5	6.22				5.66	2.2	0.09	4.69	3.44		1.84				132			25.4	8	18	53	21.2	7	178.4	948.7	26.8	297.5	21.9	7.2	1263	68.1
2021	[25162] CUBUKCU H. E. (2021)	ANATOLIA-IRAN BELT - CENOZOIC/QUATERNARY / TURKEY / WESTERN ANATOLIAN VOLCANIC BELT / BODRUM CALDERA/	27	37	30	VOLCANIC ROCK	TRACHYBASALT			MIOCENE		56.5	0.837461	34.2233	43.1824	0.128275	0.84	17.3	7.14				6.28	2.74	0.1	3.43	3.36		1.44				132			21.4	6	13	56	20	6	131.7	1026.7	30	255	18.8	10.3	1361.9	71.4
2021	[25162] CUBUKCU H. E. (2021)	ANATOLIA-IRAN BELT - CENOZOIC/QUATERNARY / TURKEY / WESTERN ANATOLIAN VOLCANIC BELT / BODRUM CALDERA/	27	37	30	VOLCANIC ROCK	TRACHYBASALT			MIOCENE		62.3	0.878898	46.7306	39.865	0.200355	0.53	16.5	4.78				4.43	1.6	0.07	4.28	3.7		2.1				75			11.6	5	12	29	18.7	6	180.7	901.9	19.3	217.8	20.1	13.3	1121.4	67.1
2021	[25162] CUBUKCU H. E. (2021)	ANATOLIA-IRAN BELT - CENOZOIC/QUATERNARY / TURKEY / WESTERN ANATOLIAN VOLCANIC BELT / BODRUM CALDERA/	27	37	30	VOLCANIC ROCK	TRACHYBASALT			MIOCENE		58.15	0.846178	40.7016	42.3095	0.132851	0.72	17.23	5.86				5.61	2.17	0.11	4.1	3.48	0.38	1.7				125			33.3	6.7	17.2	35	19.9	6.9	134.1	1009.4	24.8	293.1	20.1	10.6	1452	76.4
2021	[25162] CUBUKCU H. E. (2021)	ANATOLIA-IRAN BELT - CENOZOIC/QUATERNARY / TURKEY / WESTERN ANATOLIAN VOLCANIC BELT / BODRUM CALDERA/	27	37	30	VOLCANIC ROCK	TRACHYBASALT			MIOCENE		57.18	0.871631	43.6302	39.9587	0.12074	0.7	17.5	6.16				5.35	2.07	0.17	4	3.66	0.39	2.4				135			21.8	12.6	11.7	54	19.4	5.9	139.6	1156.2	26.5	257.9	19.5	5.6	1631	82.3
2021	[25162] CUBUKCU H. E. (2021)	ANATOLIA-IRAN BELT - CENOZOIC/QUATERNARY / TURKEY / WESTERN ANATOLIAN VOLCANIC BELT / BODRUM CALDERA/	27	37	30	VOLCANIC ROCK	TRACHYBASALT			MIOCENE		59.4	0.819652	41.0046	37.5135	0.188612	0.56	15.9	6.07				5.27	1.84	0.08	3.72	3.52		2.9				83			21.4	5	19	29	19.5	3	168.6	893.9	21.8	205.7	19.1	11	1167.8	63.5
2021	[25162] CUBUKCU H. E. (2021)	ANATOLIA-IRAN BELT - CENOZOIC/QUATERNARY / TURKEY / WESTERN ANATOLIAN VOLCANIC BELT / BODRUM CALDERA/	27	37	30	VOLCANIC ROCK	TRACHYBASALT			MIOCENE		58.75	0.921328	55.217	40.7672	0.0796856	0.68	17.32	5.64				4.95	1.96	0.08	3.81	3.45	0.34	2.6				90			17.6	7.9	20.9	35	19.1	5.4	103.4	1297.6	23.5	204.3	23.3	3.3	1512	105.3
2021	[25162] CUBUKCU H. E. (2021)	ANATOLIA-IRAN BELT - CENOZOIC/QUATERNARY / TURKEY / WESTERN ANATOLIAN VOLCANIC BELT / BODRUM CALDERA/	27	37	30	VOLCANIC ROCK	TRACHYBASALT			MIOCENE		62.53	0.871687	58.6439	39.4327	0.161121	0.55	16.61	4.35				4.11	1.43	0.07	4.88	3.83	0.28	0.9				98			16.2	5.4	8	23	18.4	2.9	193.7	1202.2	20.5	173.2	29.8	14.1	1522	97.5
2018	[21910] LECHMANN A. (2018)	ANATOLIA-IRAN BELT - CENOZOIC/QUATERNARY / IRAN / LESSER CAUCASUS//	45.2532	37.7389	42.55	VOLCANIC ROCK	TRACHYDACITE			PLIOCENE		64.04	0.882679	86.8462	42.5254	0.0513729	0.41	16.98	3.56				4.58	1.33	0.09	2.07	5.27	0.277	0.69		4.5		36	0		4.7	7.6	9.7	44	15.8		58	1129	13	149	17.8	1.2	1039	42
2008	[14421] MOAYYED M. (2008)	ANATOLIA-IRAN BELT - MESOZOIC / IRAN / ESLAMY PENINSULA///	45.5	37.9	42.55	VOLCANIC ROCK	TRACHYTE			NEOGENE		64.9	0.93705	41	16.2944	0.170732	0.27	16.88	2.34				1.44	0.23	0.08	7.78	4.24	0.06					40	2		9	6	9	56	27	54	210	1230	30	838	74		968	65
2008	[14421] MOAYYED M. (2008)	ANATOLIA-IRAN BELT - MESOZOIC / IRAN / ESLAMY PENINSULA///	45.5	37.9	42.55	VOLCANIC ROCK	TRACHYTE			NEOGENE		59.3	0.720244	45.7143	36.0343	0.178125	0.67	15.12	4.5				5.88	1.28	0.08	8.12	0.92	0.7					92	32		11	25	71	46	20	3	228	1280	28	440	39		1980	48
2008	[14421] MOAYYED M. (2008)	ANATOLIA-IRAN BELT - MESOZOIC / IRAN / ESLAMY PENINSULA///	45.5	37.9	42.55	VOLCANIC ROCK	TRACHYTE			NEOGENE		60.3	0.690535	36.6061	36.0812	0.222682	0.54	15.01	4.14				5.04	1.18	0.09	8.82	1.84	0.53					80	28		10	17	50	50	18	8	269	1208	33	557	47		1490	52
2008	[14421] MOAYYED M. (2008)	ANATOLIA-IRAN BELT - MESOZOIC / IRAN / ESLAMY PENINSULA///	45.5	37.9	42.55	VOLCANIC ROCK	TRACHYTE			NEOGENE		61.7	0.788326	35.8235	27.8846	0.188013	0.49	15.8	4.2				3.58	0.82	0.1	8.4	2.7	0.48					68	12		4	5	19	52	20	13	229	1218	34	688	60		1850	65
2008	[14421] MOAYYED M. (2008)	ANATOLIA-IRAN BELT - MESOZOIC / IRAN / ESLAMY PENINSULA///	45.5	37.9	42.55	PLUTONIC ROCK	SYENITE			NEOGENE		59.38	0.686167	32.2	38.7913	0.163043	0.67	15.1	4.5				6.1	1.44	0.08	8.17	1.26	0.69					94	30		11	24	70	47	21	4	210	1288	40	437	40		1900	48
2008	[14421] MOAYYED M. (2008)	ANATOLIA-IRAN BELT - MESOZOIC / IRAN / ESLAMY PENINSULA///	45.5	37.9	42.55	PLUTONIC ROCK	SYENITE			NEOGENE		62.4	0.78347	40.2333	30.8337	0.161558	0.78	15.02	5.42				2.88	1.22	0.07	8.71	2.74	0.32					88	22		23	20	218	83	18	40	195	1207	30	586	73		2820	52
2008	[14421] MOAYYED M. (2008)	ANATOLIA-IRAN BELT - MESOZOIC / IRAN / ESLAMY PENINSULA///	45.5	37.9	42.55	PLUTONIC ROCK	SYENITE			NEOGENE		63.18	0.897929	35.8235	32.2358	0.236453	0.68	15.08	4.08				1.88	0.98	0.09	9.44	1.92	0.21					79	5		6	9	10	68	21	28	288	1218	34	490	57		1964	54
2013	[17502] KAY S. M.(2013) [GeoReM [7742] ]	ANDEAN ARC / PATAGONIAN PLATEAU LAVAS / ARGENTINA / AUCA MAHUIDA VOLCANIC FIELD//	-68.9	-37.7402	38	VOLCANIC ROCK	BASALT			NEOGENE		56.44	0.75883	28.28	34.2505	0.11174	0.97	18.96			5.68		6.46	1.66	0.17	3.19	5.95	0.37			3.6			0		7	3					79	707	25	304	39	2.5	830	41.4
2013	[17502] KAY S. M.(2013) [GeoReM [7742] ]	ANDEAN ARC / PATAGONIAN PLATEAU LAVAS / ARGENTINA / AUCA MAHUIDA VOLCANIC FIELD//	-68.9217	-37.74	38	VOLCANIC ROCK	TRACHYTE			NEOGENE		62.31	0.924089	12.2	18.4301	0.348361	0.48	18.68			4.26		2.2	0.54	0.13	4.98	6.58	0.16			5.2			4		3	4					85	244	20	298	31	1.8	748	33
2019	[23172] COX D.(2019) [GeoReM [12406] ]	ANDEAN ARC / SOUTHERN ANDEAN VOLCANIC ZONE / CHILE / ANTUCO//	-71.33	-37.45	45.81	VOLCANIC ROCK	ANDESITE			PLEISTOCENE-HOLOCENE		62.536	0.918627	16.5289	37.0491	0.14703	0.7996	17.454	6.572				4.939	1.953	0.1389	1.961	4.801	0.256	-0.12	23.7535	12.1649		73.1627	4.10786		9.96849	2.59697	5.41077	83.0665	19.3948	1.2842	64.278	437.176	26.4492	139.025	5.04436	1.80993	458.093	19.6391
2019	[23172] COX D.(2019) [GeoReM [12406] ]	ANDEAN ARC / SOUTHERN ANDEAN VOLCANIC ZONE / CHILE / ANTUCO//	-71.33	-37.45	45.81	VOLCANIC ROCK	ANDESITE, BASALTIC			PLEISTOCENE-HOLOCENE		56.499	0.857658	12.9997	43.7492	0.12126	1.1646	17.136	9.106				6.692	3.576	0.1513	1.513	3.754	0.252	-0.228132	19.5394	22.7744		190.582	29.7107		23.6298	16.3576	49.7442	86.0471	18.9475	0.795428	48.6042	400.826	30.8334	157.557	4.33522	1.55352	338.513	16.0956
2019	[23172] COX D.(2019) [GeoReM [12406] ]	ANDEAN ARC / SOUTHERN ANDEAN VOLCANIC ZONE / CHILE / ANTUCO//	-71.33	-37.45	45.81	VOLCANIC ROCK	TRACHYANDESITE			PLEISTOCENE-HOLOCENE		58.2015	0.825486	16.942	37.654	0.129385	1.06064	16.3937	8.26755				5.71895	2.5212	0.144617	1.81747	4.55585	0.265384	0.394606	25.3541	18.5051		166.992	2.38686		17.5992	3.57638	21.5569	79.9852	19.198	3.50735	57.6496	445.566	26.2994	157.448	5.17082	3.52223	413.04	17.919
2019	[23172] COX D.(2019) [GeoReM [12406] ]	ANDEAN ARC / SOUTHERN ANDEAN VOLCANIC ZONE / CHILE / ANTUCO//	-71.3	-37.41	45.81	VOLCANIC ROCK	ANDESITE			PLEISTOCENE-HOLOCENE		60.024	0.890733	13.2104	38.5777	0.121187	0.9289	17.496	7.653				5.669	2.427	0.1518	1.705	4.553	0.232	-0.220556	21.604	18.8017		130.341	6.38809		15.2496	4.81151	24.9706	84.3932	19.544	1.06419	47.2953	390.266	29.5423	150.34	4.63245	1.27486	406.038	15.8721
2019	[23172] COX D.(2019) [GeoReM [12406] ]	ANDEAN ARC / SOUTHERN ANDEAN VOLCANIC ZONE / CHILE / ANTUCO//	-71.34	-37.4	45.81	VOLCANIC ROCK	ANDESITE			PLEISTOCENE-HOLOCENE		60.918	0.881246	12.0943	35.3106	0.0824963	1.0128	16.839	7.496				4.978	2.066	0.1702	1.471	5.146	0.365	-0.272496	15.9794	16.9828		84.5813	2.15581		11.4409	3.27602	48.6033	98.7946	20.0432	4.83479	33.6597	408.014	33.7361	175.52	5.27626	1.3593	397.958	17.9531
2019	[23172] COX D.(2019) [GeoReM [12406] ]	ANDEAN ARC / SOUTHERN ANDEAN VOLCANIC ZONE / CHILE / ANTUCO//	-71.34	-37.4	45.81	VOLCANIC ROCK	ANDESITE			PLEISTOCENE-HOLOCENE		57.6871	0.9306	12.4532	32.4272	0.0967614	1.033	16.2976	7.68916				4.78244	1.86313	0.170996	1.51206	4.36547	0.374645	4.37675	22.7595	17.2752		81.0496	1.85015		11.6114	3.30638	57.2309	113.81	20.1149	5.80011	39.8031	411.353	33.0318	173.76	5.08865	2.62696	393.458	17.4401
2019	[23172] COX D.(2019) [GeoReM [12406] ]	ANDEAN ARC / SOUTHERN ANDEAN VOLCANIC ZONE / CHILE / ANTUCO//	-71.35	-37.39	45.81	VOLCANIC ROCK	ANDESITE			PLEISTOCENE-HOLOCENE		62.271	0.885858	14.4246	32.8262	0.105538	0.8999	16.268	6.914				4.415	1.706	0.1509	1.67	5.185	0.334	-0.132994	25.7385	14.3764		80.5304	1.82525		10.736	2.74978	58.9137	95.4425	19.7138	5.36267	41.6326	394.478	27.3477	175.552	5.30037	2.01184	450.998	20.1589
2019	[23172] COX D.(2019) [GeoReM [12406] ]	ANDEAN ARC / SOUTHERN ANDEAN VOLCANIC ZONE / CHILE / ANTUCO//	-71.35	-37.39	45.81	VOLCANIC ROCK	ANDESITE			PLEISTOCENE-HOLOCENE		61.5941	0.908716	15.14	29.1582	0.105707	0.951263	16.1709	7.25895				4.41099	1.5086	0.155479	1.73554	4.80055	0.333999	0.329773	24.8339	14.5489		86.6944	1.76484		10.8954	2.13379	58.643	94.7138	19.9662	5.08478	43.1088	407.814	26.9362	172.42	5.07004	2.14784	445.131	19.3411
2019	[23172] COX D.(2019) [GeoReM [12406] ]	ANDEAN ARC / SOUTHERN ANDEAN VOLCANIC ZONE / CHILE / ANTUCO//	-71.46	-37.4	45.81	VOLCANIC ROCK	ANDESITE, BASALTIC			PLEISTOCENE-HOLOCENE		56.03	0.786234	14.4134	38.2374	0.0594845	1.5041	16.646	10.451				6.891	3.267	0.1804	1.143	4.502	0.314	-0.403271	17.4793	28.4744		287.381	1.93381		22.3427	8.06861	76.9794	110.095	20.7595	3.11778	25.305	425.405	29.5145	136.887	4.3497	1.36154	323.809	14.1353
2019	[23172] COX D.(2019) [GeoReM [12406] ]	ANDEAN ARC / SOUTHERN ANDEAN VOLCANIC ZONE / CHILE / ANTUCO//	-71.46	-37.4	45.81	VOLCANIC ROCK	TRACHYANDESITE			PLEISTOCENE-HOLOCENE		59.5537	0.850522	10.8821	29.1788	0.119916	1.31754	15.7022	8.61986				4.79605	1.79321	0.169203	1.71157	4.79593	0.408787	-0.11937	26.5536	21.6739		117.754	1.75329		13.4227	2.53398	63.2007	103.599	20.6153	4.7232	46.0191	383.76	35.2653	182.083	5.62629	2.57124	438.829	19.5711
1988	[6652] MUNOZ J. B. (1988)	ANDEAN ARC / SOUTHERN ANDEAN VOLCANIC ZONE / CHILE / CAVIAHUE-COPAHUE VOLCANIC COMPLEX//	-71.2	-37.83	45.81	VOLCANIC ROCK	NOT GIVEN			PLEISTOCENE		64.05	0.925451	9.71429	30.5538	0.197059	0.97	15.66		1.52	4.578	3.21	2.53	1.13	0.15	2.28	5.99	0.26					20	4			3					67	340	35	281	13		640
2000	[7022] KONDO H. (2000)	HONSHU ARC / NORTHEASTERN HONSHU ARC / HONSHU / MYOJIN-IWA FORMATION//	139	38.5	24.68	VOLCANIC ROCK	NOT GIVEN			PLIOCENE		56.53	0.833931	7.58	35.8199	0.147757	1.29	17.58			8.08		6.89	2.53	0.16	2.31	3.68	0.28					187	5			3					56	379	50	140	8.9		399
2000	[7022] KONDO H. (2000)	HONSHU ARC / NORTHEASTERN HONSHU ARC / HONSHU / MYOJIN-IWA FORMATION//	139	38.5	24.68	VOLCANIC ROCK	NOT GIVEN			PLIOCENE		56.95	0.883037	12.0857	39.1019	0.118203	1.26	17.83			6.94		6.9	2.5	0.16	2.11	3.26	0.31					174	15			2					50	423	35	141	10.3		350
2000	[7022] KONDO H. (2000)	HONSHU ARC / NORTHEASTERN HONSHU ARC / HONSHU / MYOJIN-IWA FORMATION//	139	38.5	24.68	VOLCANIC ROCK	NOT GIVEN			PLIOCENE		60.71	0.894331	10.3714	40.2689	0.179063	0.8	17.46			5.42		5.76	2.05	0.15	2.48	3.87	0.22					104	34			5					65	363	35	162	11.1		447
2000	[7022] KONDO H. (2000)	HONSHU ARC / NORTHEASTERN HONSHU ARC / HONSHU / MYOJIN-IWA FORMATION//	139	38.5	24.68	VOLCANIC ROCK	NOT GIVEN			PLIOCENE		56.26	0.891936	9.60465	36.4204	0.150121	1.24	17.38			6.69		6.21	2.15	0.15	2.48	3.35	0.35					191	2			3					62	413	43	152	11.9		399
2000	[7022] KONDO H. (2000)	HONSHU ARC / NORTHEASTERN HONSHU ARC / HONSHU / MYOJIN-IWA FORMATION//	139	38.5	24.68	VOLCANIC ROCK	NOT GIVEN			PLIOCENE		56.91	0.827729	8.29268	43.7531	0.194118	1.02	16.81			7.47		7.07	3.26	0.15	2.51	2.88	0.23					166	18			9					66	340	41	130	7.3		411
2000	[7022] KONDO H. (2000)	HONSHU ARC / NORTHEASTERN HONSHU ARC / HONSHU / MYOJIN-IWA FORMATION//	139	38.5	24.68	VOLCANIC ROCK	ANDESITE, PYROXENE			PLIOCENE		57.32	0.847449	8.63889	43.2247	0.215434	0.98	16.84			6.93		6.6	2.96	0.18	2.47	3.16	0.23					161	25			11					67	311	36	145	9.7		422
2000	[7022] KONDO H. (2000)	HONSHU ARC / NORTHEASTERN HONSHU ARC / HONSHU / MYOJIN-IWA FORMATION//	139	38.5	24.68	VOLCANIC ROCK	NOT GIVEN			PLIOCENE		57.68	0.925632	10.1429	35.8872	0.160563	1.06	17.47			6.91		5.96	2.17	0.17	2.38	3.32	0.24					168	9			4					57	355	35	144	9.3		416
2000	[7022] KONDO H. (2000)	HONSHU ARC / NORTHEASTERN HONSHU ARC / HONSHU / MYOJIN-IWA FORMATION//	139	38.5	24.68	VOLCANIC ROCK	NOT GIVEN			PLIOCENE		57.72	0.865162	8.65	38.423	0.17052	1.08	16.91			6.77		6.01	2.37	0.2	2.4	3.66	0.27					162	7			35					59	346	40	155	12		390
2000	[7022] KONDO H. (2000)	HONSHU ARC / NORTHEASTERN HONSHU ARC / HONSHU / MYOJIN-IWA FORMATION//	139	38.5	24.68	VOLCANIC ROCK	ANDESITE, PYROXENE			PLIOCENE		57.79	0.830478	11.0938	42.5679	0.194366	1.03	17.06			6.95		6.87	2.89	0.12	2.53	3.23	0.23					172	19			9					69	355	32	136	10.2		479
2000	[7022] KONDO H. (2000)	HONSHU ARC / NORTHEASTERN HONSHU ARC / HONSHU / MYOJIN-IWA FORMATION//	139	38.5	24.68	VOLCANIC ROCK	NOT GIVEN			PLIOCENE		58.35	0.87158	7.95	43.991	0.226415	0.96	16.94			5.56		5.97	2.45	0.14	2.67	3.46	0.36					158	6			4					72	318	40	162	11.3		456
2000	[7022] KONDO H. (2000)	HONSHU ARC / NORTHEASTERN HONSHU ARC / HONSHU / MYOJIN-IWA FORMATION//	139	38.5	24.68	VOLCANIC ROCK	NOT GIVEN			PLIOCENE		58.61	0.898541	7.93023	32.8617	0.175953	0.96	17.21			6.3		5.81	1.73	0.2	2.48	3.59	0.24					141	17			14					60	341	43	159	11.3		465
2000	[7022] KONDO H. (2000)	HONSHU ARC / NORTHEASTERN HONSHU ARC / HONSHU / MYOJIN-IWA FORMATION//	139	38.5	24.68	VOLCANIC ROCK	NOT GIVEN			PLIOCENE		58.69	0.893179	8.9	31.7974	0.171348	1.06	16.89			6.27		5.67	1.64	0.16	2.46	3.61	0.28					164	1			37					61	356	40	156	11.1		497
2000	[7022] KONDO H. (2000)	HONSHU ARC / NORTHEASTERN HONSHU ARC / HONSHU / MYOJIN-IWA FORMATION//	139	38.5	24.68	VOLCANIC ROCK	NOT GIVEN			PLIOCENE		59.46	0.874611	7.64103	40.5208	0.265101	0.92	16.81			6.07		5.84	2.32	0.16	2.78	3.4	0.22					134	18			8					79	298	39	164	9.8		453
2000	[7022] KONDO H. (2000)	HONSHU ARC / NORTHEASTERN HONSHU ARC / HONSHU / MYOJIN-IWA FORMATION//	139	38.5	24.68	VOLCANIC ROCK	ANDESITE, PYROXENE			PLIOCENE		59.58	0.867017	7.825	44.453	0.236422	1.02	17.09			5.88		6.29	2.64	0.12	2.63	3.3	0.24					150	20			12					74	313	40	159	10.6		455
2000	[7022] KONDO H. (2000)	HONSHU ARC / NORTHEASTERN HONSHU ARC / HONSHU / MYOJIN-IWA FORMATION//	139	38.5	24.68	VOLCANIC ROCK	NOT GIVEN			PLIOCENE		60.52	0.927097	10.5	34.1514	0.184874	0.98	17.22			5.98		5.26	1.74	0.2	2.58	3.78	0.26					129	2			3					66	357	34	152	8.6		483
2000	[7022] KONDO H. (2000)	HONSHU ARC / NORTHEASTERN HONSHU ARC / HONSHU / MYOJIN-IWA FORMATION//	139	38.5	24.68	VOLCANIC ROCK	ANDESITE, PYROXENE			PLIOCENE		60.95	0.945126	6.83333	27.4896	0.219512	0.92	16.69			5.83		4.71	1.24	0.16	2.78	3.7	0.26					128	1			3					72	328	48	176	12.8		503
2000	[7022] KONDO H. (2000)	HONSHU ARC / NORTHEASTERN HONSHU ARC / HONSHU / MYOJIN-IWA FORMATION//	139	38.5	24.68	VOLCANIC ROCK	ANDESITE, PYROXENE-HORNBLENDE			PLIOCENE		61.29	0.90767	8.36957	36.0469	0.181818	0.97	17.26			4.87		5.31	1.54	0.15	2.98	3.73	0.32					131	6			9					70	385	46	174	11.8		438
2000	[7022] KONDO H. (2000)	HONSHU ARC / NORTHEASTERN HONSHU ARC / HONSHU / MYOJIN-IWA FORMATION//	139	38.5	24.68	VOLCANIC ROCK	NOT GIVEN			PLIOCENE		61.33	0.924403	9.36842	35.9847	0.188202	0.84	17.23			5.01		5.17	1.58	0.15	2.7	3.84	0.28					113	1			3					67	356	38	178	8.8		487
2000	[7022] KONDO H. (2000)	HONSHU ARC / NORTHEASTERN HONSHU ARC / HONSHU / MYOJIN-IWA FORMATION//	139	38.5	24.68	VOLCANIC ROCK	ANDESITE, PYROXENE-HORNBLENDE			PLIOCENE		61.78	0.935919	8.7907	27.033	0.190476	0.85	17.58			4.33		5	0.9	0.14	2.8	4.05	0.3					112	2			2					72	378	43	182	11.9		495
1989	[4261] TAMURA S. (1989)	HONSHU ARC / NORTHEASTERN HONSHU ARC / HONSHU / JOGE VOLCANICS//	140.5	38.5	27.83	VOLCANIC ROCK	ANDESITE, HYPERSTHENE-AUGITE-PLAGIOCLASE			MIOCENE		59.08	0.880903	6.25	34.9227	0.0754286	0.83	14.99		5.23	9.267	4.56	6.47	2.79	0.15	0.75	2.7	0.1														13.2	175	28	60	3
1989	[4261] TAMURA S. (1989)	HONSHU ARC / NORTHEASTERN HONSHU ARC / HONSHU / JOGE VOLCANICS//	140.5	38.5	27.83	VOLCANIC ROCK	ANDESITE, HYPERSTHENE-AUGITE-PLAGIOCLASE			MIOCENE		59.4	0.880512	11.1111	37.4433	0.0475	0.87	15.56		4.78	9.172	4.87	7.1	3.08	0.17	0.54	2.54	0.1														9.5	200	18	61	2.3
1989	[4261] TAMURA S. (1989)	HONSHU ARC / NORTHEASTERN HONSHU ARC / HONSHU / MITAKI VOLCANICS//	140.5	38.5	27.83	VOLCANIC ROCK	ANDESITE, AUGITE-HYPERSTHENE-PLAGIOCLASE			MIOCENE		56.14	0.834502	11	43.962	0.0392344	0.84	16.31		2.4	9.27	7.11	8.54	4.08	0.15	0.49	2.12	0.08														8.2	209	19	39	1.8
1989	[4261] TAMURA S. (1989)	HONSHU ARC / NORTHEASTERN HONSHU ARC / HONSHU / MITAKI VOLCANICS//	140.5	38.5	27.83	VOLCANIC ROCK	ANDESITE, AUGITE-HYPERSTHENE-PLAGIOCLASE			MIOCENE		56.65	0.874816	9.63158	38.9738	0.0273224	0.81	16.25		4.58	10.522	6.4	7.9	3.77	0.19	0.32	2.35	0.06														5	183	19	35	3.1
1989	[4261] TAMURA S. (1989)	HONSHU ARC / NORTHEASTERN HONSHU ARC / HONSHU / MITAKI VOLCANICS//	140.5	38.5	27.83	VOLCANIC ROCK	ANDESITE, AUGITE-HYPERSTHENE-PLAGIOCLASE			MIOCENE		56.19	0.884891	11.1333	36.6638	0.0209581	0.69	17.71		3.76	9.884	6.5	9.2	3.21	0.15	0.21	1.86	0.04														3.5	167	15	35	3
1989	[4261] TAMURA S. (1989)	HONSHU ARC / NORTHEASTERN HONSHU ARC / HONSHU / MITAKI VOLCANICS//	140.5	38.5	27.83	VOLCANIC ROCK	ANDESITE			MIOCENE		63.18	0.89164	6.68	29.3805	0.0305389	0.72	14.42		3.33	8.997	6	6.26	2.1	0.17	0.49	2.59	0.06														5.1	167	25	54	2.3
1990	[3409] SHUTO K. (1990)	HONSHU ARC / NORTHEASTERN HONSHU ARC / HONSHU / NANATSUMORI//	140.3	38.7	27.83	VOLCANIC ROCK	DACITE, AUGITE-HYPERSTHENE-PLAGIOCLASE			PLIOCENE		67.12	0.969576	6.5	33.8048	0.191855	0.73	15.31		1.83	4.677	3.03	4.78	1.34	0.14	1.24	3.5	0.16									5					42.4	221	34	128	5.6
2006	[9796] HANYU TAKESHI(2006) [GeoReM [2534] ]	HONSHU ARC / NORTHEASTERN HONSHU ARC / HONSHU / TAKADATE VOLCANICS//	140.5	38.5	27.83	VOLCANIC ROCK	DACITE			MIOCENE		66.33	0.968674	12.575	9.68255	0.0318091	0.75	17.39	3.51				4.33	0.19	0.06	1.06	5.43	0.34									9	2	106			16	503	40	105	3.8	0.675	349	14.1
1986	[6487] BRIGGS R. M. (1986)	NEW ZEALAND / COROMANDEL-TAUPO / TAUPO VOLCANIC ZONE / MAUNGATAUTARI//	175.567	-38.0167	34.14	VOLCANIC ROCK	ANDESITE, LABRADORITE			NEOGENE		60.41	0.937685	16.8333	44.7182	0.165842	0.75	17.71		1.28	6.302	5.15	6.23	2.86	0.11	2.03	3.26	0.19	1.66			16		182	19		31	12	19	75	18		67	404	24	140	8	1.5	610
1986	[6487] BRIGGS R. M. (1986)	NEW ZEALAND / COROMANDEL-TAUPO / TAUPO VOLCANIC ZONE / MAUNGATAUTARI//	175.567	-38.0167	34.14	VOLCANIC ROCK	DACITE, HORNBLENDE			NEOGENE		63.08	0.996791	18.1429	44.317	0.191601	0.62	17.44		1.07	5.263	4.3	5.08	2.35	0.1	2.16	3.6	0.19	1.8					123	14			10	25	59	20		73	381	21	138	8		566
1986	[6487] BRIGGS R. M. (1986)	NEW ZEALAND / COROMANDEL-TAUPO / TAUPO VOLCANIC ZONE / MAUNGATAUTARI//	175.567	-38.0167	34.14	VOLCANIC ROCK	DACITE, HORNBLENDE			NEOGENE		63.44	0.985426	16.3182	40.9056	0.225627	0.59	17.26		1.07	5.253	4.29	4.55	2.04	0.11	2.46	4	0.18	1.9					105	12			10	16	56	18		81	359	22	153	9		710
1986	[6487] BRIGGS R. M. (1986)	NEW ZEALAND / COROMANDEL-TAUPO / TAUPO VOLCANIC ZONE / MAUNGATAUTARI//	175.567	-38.0167	34.14	VOLCANIC ROCK	DACITE, HORNBLENDE			NEOGENE		64.94	0.961722	14.72	44.3985	0.252717	0.54	16.63		0.94	4.576	3.73	4.57	2.05	0.08	2.6	3.75	0.16	1.19					124	12			9	15	65	16		93	368	25	165	11		710
1992	[3637] BLAKE S. (1992)	NEW ZEALAND / COROMANDEL-TAUPO / TAUPO VOLCANIC ZONE / TAUPO VOLCANIC CENTER//	175.32	-38.62	34.14	VOLCANIC ROCK	ANDESITE			PLINIAN		58.87	0.815872	13	38.6023	0.136923	1.56	15.63	8.82				6.37	2.8	0.15	1.3	3.75	0.74	0.93					101	3				1	104			44.5	325	25	124	5		315
2000	[8477] ALDANMAZ E. (2000)	ANATOLIA-IRAN BELT - CENOZOIC/QUATERNARY / TURKEY / WESTERN ANATOLIAN VOLCANIC BELT / FOCA DIKE/	26.7567	38.6706	28.16	VOLCANIC ROCK	TRACHYANDESITE, BASALTIC			MIOCENE		56.64	0.697982	26.7983	35.2234	0.154594	1.03	17.16	7.43				8.83	2.04	0.08	2.76	3.37	0.32	1.14		18.5		154.9	166.3		15.6	44.5	33.6	55.7	18.7		98.6	637.8	23.8	191.5	17.3	4.7	919.8	46.44
2013	[17395] KARACIK Z. (2013)	ANATOLIA-IRAN BELT - CENOZOIC/QUATERNARY / TURKEY / WESTERN ANATOLIAN VOLCANIC BELT / KARABURUN VOLCANICS/	26	38.7	28.16	VOLCANIC ROCK	ANDESITE			MIOCENE		62.86	0.973339	19.7186	36.6348	0.309633	0.64	17.08	4.83				4.39	1.41	0.06	3.23	3.69	0.16	1.5		9		76			9.4	20			19.3		121.5	392.4	19.9	173.6	10.4	4.4	784	34
2009	[13622] HELVACI C. (2009)	ANATOLIA-IRAN BELT - CENOZOIC/QUATERNARY / TURKEY / WESTERN ANATOLIAN VOLCANIC BELT / KOCADAG VOLCANICS/	26	38.7	28.16	VOLCANIC ROCK	TRACHYANDESITE			MIOCENE		62.7	0.974427	18.8073	39.6037	0.235854	0.62	17.21	4.47				4.43	1.48	0.05	3.04	3.84	0.18	1.9		10		87			30	3.2					96.7	410	21.8	151.1	9.3	3.3	948.8	34
2009	[13622] HELVACI C. (2009)	ANATOLIA-IRAN BELT - CENOZOIC/QUATERNARY / TURKEY / WESTERN ANATOLIAN VOLCANIC BELT / KOCADAG VOLCANICS/	26	38.7	28.16	VOLCANIC ROCK	TRACHYANDESITE			MIOCENE		62.54	0.963977	21.6802	33.6447	0.283774	0.63	17.54	4.57				4.65	1.17	0.04	3.27	3.77	0.17	1.4		10		73			40.1	3					121.2	427.1	19.7	191	10.8	4.6	792.7	32.2
2009	[13622] HELVACI C. (2009)	ANATOLIA-IRAN BELT - CENOZOIC/QUATERNARY / TURKEY / WESTERN ANATOLIAN VOLCANIC BELT / KOCADAG VOLCANICS/	26	38.7	28.16	VOLCANIC ROCK	TRACHYANDESITE			MIOCENE		62.91	0.968824	19.8689	41.8267	0.279746	0.62	17.33	4.6				4.55	1.67	0.06	3.26	3.7	0.17	1		9		75			39.4	2.6					114.5	409.3	20.6	191.6	10.9	4.5	769.7	33.5
2009	[13622] HELVACI C. (2009)	ANATOLIA-IRAN BELT - CENOZOIC/QUATERNARY / TURKEY / WESTERN ANATOLIAN VOLCANIC BELT / KOCADAG VOLCANICS/	26	38.7	28.16	VOLCANIC ROCK	TRACHYANDESITE			MIOCENE		62.12	0.975345	19.6991	44.4386	0.287662	0.62	17.26	4.68				4.61	1.89	0.07	3.18	3.57	0.17	1.7		9		75			42.2	1.5					122.4	425.5	21.6	186.9	10.9	5.7	791.8	33.5
2009	[13622] HELVACI C. (2009)	ANATOLIA-IRAN BELT - CENOZOIC/QUATERNARY / TURKEY / WESTERN ANATOLIAN VOLCANIC BELT / KOCADAG VOLCANICS/	26	38.7	28.16	VOLCANIC ROCK	TRACHYANDESITE			MIOCENE		62.36	0.979852	18.0983	32.7249	0.295396	0.63	17.54	4.56				4.47	1.12	0.04	3.3	3.77	0.18	1.9		9		74			31.2	2.8					125.1	423.5	23.4	192.8	11.3	4.6	780.5	35.2
2015	[19250] SEGHEDI I. (2015)	ANATOLIA-IRAN BELT - CENOZOIC/QUATERNARY / TURKEY / WESTERN ANATOLIAN VOLCANIC BELT / YAMANLAR/	27.07	38.61	30.85	VOLCANIC ROCK	ANDESITE			MIOCENE		59.18	0.980223	30.0655	44.9119	0.100944	0.58	16.15	5.32				4.75	2.19	0.08	2.41	3.18	0.18	5.7		12		79			21.4	4.3	10.6	50	17.4		69.5	688.5	22.9	146.3	9.9	1.9	959	39.1
2015	[19250] SEGHEDI I. (2015)	ANATOLIA-IRAN BELT - CENOZOIC/QUATERNARY / TURKEY / WESTERN ANATOLIAN VOLCANIC BELT / YAMANLAR/	27.07	38.61	30.85	VOLCANIC ROCK	ANDESITE			MIOCENE		56.76	0.85656	27.4413	42.2178	0.136176	0.81	17.4	7.4				6.82	2.73	0.11	2.57	3.12	0.3	1.6		19		176			30.4	7.3	24.3	51	18.9		92.3	677.8	24.7	165.9	9	3.1	1174	37.5
2004	[8739] AKAY E. (2004)	ANATOLIA-IRAN BELT - CENOZOIC/QUATERNARY / TURKEY / WESTERN ANATOLIAN VOLCANIC BELT / YUNTDAGI / FOCA ALKALINE VOLCANICS	27.1333	38.7167	30.85	VOLCANIC ROCK	TRACHYANDESITE			MIOCENE		59.55	0.843157	25.4515	41.2309	0.302499	0.847	17.38	5.42				5.44	1.92	0.047	3.751	4.05	0.281	0.72		12.5		111.6	41.5			34.1	22	58.3			158.6	524.3	20.6	288.1	18.2		1024	58.4
2004	[8739] AKAY E. (2004)	ANATOLIA-IRAN BELT - CENOZOIC/QUATERNARY / TURKEY / WESTERN ANATOLIAN VOLCANIC BELT / YUNTDAGI / YUNTDAG FORMATION	27.1333	38.7167	30.85	VOLCANIC ROCK	ANDESITE			MIOCENE		62.74	0.940548	29.1121	28.7075	0.114747	0.691	17.49	4.82			4.33	5.29	0.98	0.047	2.595	3.75	0.199	1.08		21.7		137.9	118.9			30.9	29.1	60.7			77.5	675.4	23.2	161.6	10.2		1621.4	36.9
2004	[8739] AKAY E. (2004)	ANATOLIA-IRAN BELT - CENOZOIC/QUATERNARY / TURKEY / WESTERN ANATOLIAN VOLCANIC BELT / YUNTDAGI / YUNTDAG FORMATION	27.1333	38.7167	30.85	VOLCANIC ROCK	TRACHYANDESITE			MIOCENE		60.48	0.837477	23.3346	0	0.266194	0.809	16.24	5.9			5.3	5.12		0.09	3.768	3.65	0.309	1.02		13		128.4	20.1			20.3	30.7	69.9			161.5	606.7	26	285.5	18.1		1229.8	52.4
2004	[8739] AKAY E. (2004)	ANATOLIA-IRAN BELT - CENOZOIC/QUATERNARY / TURKEY / WESTERN ANATOLIAN VOLCANIC BELT / YUNTDAGI / YUNTDAG FORMATION	27.1333	38.7167	30.85	VOLCANIC ROCK	TRACHYANDESITE			MIOCENE		60.78	0.933641	20.1303	39.1934	0.386141	0.736	16.28	5.5			4.95	4.27	1.79	0.065	3.998	3.25	0.288	2.51		15.8		118.2	15			16.9	30.7	60.9			185	479.1	23.8	306.8	18.1		1164.3	55.1
2004	[8739] AKAY E. (2004)	ANATOLIA-IRAN BELT - CENOZOIC/QUATERNARY / TURKEY / WESTERN ANATOLIAN VOLCANIC BELT / YUNTDAGI / YUNTDAG FORMATION	27.1333	38.7167	30.85	VOLCANIC ROCK	TRACHYTE			MIOCENE		65.21	0.940621	19.0526	28.7187	0.254538	0.575	16.37	4.08			3.65	3.34	0.83	0.033	3.69	4.46	0.255	0.91		8		54.2	3.1			9.2	6.7	61.4			129	506.8	26.6	252.3	14.2		1492.2	52
2004	[8739] AKAY E. (2004)	ANATOLIA-IRAN BELT - CENOZOIC/QUATERNARY / TURKEY / WESTERN ANATOLIAN VOLCANIC BELT / YUNTDAGI / YUNTDAG FORMATION	27.1333	38.7167	30.85	VOLCANIC ROCK	TRACHYANDESITE			MIOCENE		59.81	0.923018	29.4198	43.2012	0.242264	0.76	16.75	6.77			6.09	4.87	2.6	0.103	3.798	3.15	0.414	1.34		18.3		133.3	13.8			14.8	29.7	61.3			151.1	623.7	21.2	234.9	16.2		1142.2	40.2
2004	[8739] AKAY E. (2004)	ANATOLIA-IRAN BELT - CENOZOIC/QUATERNARY / TURKEY / WESTERN ANATOLIAN VOLCANIC BELT / YUNTDAGI / YUNTDAG FORMATION	27.1333	38.7167	30.85	VOLCANIC ROCK	TRACHYANDESITE, BASALTIC			MIOCENE		58.46	0.84377	20.5936	42.146	0.227123	0.935	17.36	6.28			5.65	6.02	2.31	0.075	2.893	3.95	0.352	0.78		18.5		163.6	30.6			21.4	38.8	67.9			117.4	516.9	25.1	204.1	12.2		1066.6	25.8
2007	[10704] ERSOY Y. (2007)	ANATOLIA-IRAN BELT - CENOZOIC/QUATERNARY / TURKEY / WESTERN ANATOLIAN VOLCANIC BELT / HACIBEKIR GROUP - EGRELTIDAG VOLCANIC UNIT/	28.82	38.95	34.94	VOLCANIC ROCK	DACITE			MIOCENE		65.8	0.837168	11.6899	25.0974	0.398808	0.49	14.8	3.31				4.41	0.56	0.17	3.91	3.3	0.15	3		8		59				2.6			16.5		133.8	335.5	28.7	180.3	13.7	5.3	1368.5	36.5
2010	[14752] KARAOGLU ? (2010)	ANATOLIA-IRAN BELT - CENOZOIC/QUATERNARY / TURKEY / WESTERN ANATOLIAN VOLCANIC BELT / BEYDAGI VOLCANIC UNIT/	29.41	38.68	35.3	VOLCANIC ROCK	NOT GIVEN			MIOCENE		62.66	0.945266	21.6364	44.2347	0.310924	0.53	15.4	3.82				4.05	1.53	0.06	4.51	2.46	0.21	4.3		10		75	13.69		22.6	6					148	476	22	208	19.5	2.9	1028	44
2010	[14752] KARAOGLU ? (2010)	ANATOLIA-IRAN BELT - CENOZOIC/QUATERNARY / TURKEY / WESTERN ANATOLIAN VOLCANIC BELT / BEYDAGI VOLCANIC UNIT/	29.41	38.68	35.3	VOLCANIC ROCK	NOT GIVEN			MIOCENE		59.74	0.873986	31.3869	42.2578	0.146512	0.7	17.13	5.25				5.17	1.94	0.06	4.15	3.47	0.33	1.7		13		110	41.06		21.5	5					126	860	27.4	326	20.9	4.6	1273	69
2010	[14752] KARAOGLU ? (2010)	ANATOLIA-IRAN BELT - CENOZOIC/QUATERNARY / TURKEY / WESTERN ANATOLIAN VOLCANIC BELT / BEYDAGI VOLCANIC UNIT/	29.41	38.68	35.3	VOLCANIC ROCK	NOT GIVEN			MIOCENE		58.28	0.911372	42.0502	43.8658	0.131343	0.6	17.63	4.79				5.11	1.89	0.08	4.41	3.21	0.3	3.3		10		95	20.53		39.1	7					132	1005	23.9	330	22	11	1417	79
2010	[14752] KARAOGLU ? (2010)	ANATOLIA-IRAN BELT - CENOZOIC/QUATERNARY / TURKEY / WESTERN ANATOLIAN VOLCANIC BELT / BEYDAGI VOLCANIC UNIT/	29.41	38.68	35.3	VOLCANIC ROCK	NOT GIVEN			MIOCENE		61.63	0.872481	20.2103	41.0644	0.2	0.82	15.85	5.23				4.75	1.84	0.05	4.58	2.78	0.5	1.5		15		68	205.28		23.7	23					173	865	42.8	354	26.5	10.9	1740	69
2012	[15953] ERSOY Y.(2012) [GeoReM [6679] ]	ANATOLIA-IRAN BELT - CENOZOIC/QUATERNARY / TURKEY / WESTERN ANATOLIAN VOLCANIC BELT / KARABACAKLAR VOLCANICS/	29.95	38.46	35.3	VOLCANIC ROCK	TRACHYTE			MIOCENE		61.9	0.881699	28.5451	38.5734	0.354719	1.15	14.43	4.51				2.58	1.43	0.18	6.82	2.61	0.862	3.1		11		110	198.433		38.3	34			18.5		258.2	727.9	25.5	556	25.2	66.6	1393	43.2
2012	[15953] ERSOY Y.(2012) [GeoReM [6679] ]	ANATOLIA-IRAN BELT - CENOZOIC/QUATERNARY / TURKEY / WESTERN ANATOLIAN VOLCANIC BELT / KARABACAKLAR VOLCANICS/	29.95	38.46	35.3	VOLCANIC ROCK	TRACHYTE			MIOCENE		61.24	0.990317	34.269	44.1393	0.359502	1.2	15.37	3.91				2.27	1.56	0.01	7	2.32	0.915	3.9		9		102	225.803		29.7	65.2			19.8		242.7	675.1	19.7	575.7	26.4	15.5	1571	43.5
2010	[14752] KARAOGLU ? (2010)	ANATOLIA-IRAN BELT - CENOZOIC/QUATERNARY / TURKEY / WESTERN ANATOLIAN VOLCANIC BELT / PYAMTEPE VOLCANIC UNIT/	29.3016	38.8138	35.3	VOLCANIC ROCK	NOT GIVEN			MIOCENE		61.35	0.85534	24.1581	44.2523	0.317212	1.02	14.02	4.94				2.99	1.98	0.39	6.2	2.58	0.75	3.4		10		99	0		29.5	35					223	703	29.1	497	23.3	65.9	1324	40
2010	[14752] KARAOGLU ? (2010)	ANATOLIA-IRAN BELT - CENOZOIC/QUATERNARY / TURKEY / WESTERN ANATOLIAN VOLCANIC BELT / PYAMTEPE VOLCANIC UNIT/	29.3	38.8	35.3	VOLCANIC ROCK	NOT GIVEN			MIOCENE		61.56	0.9642	37.0256	43.7085	0.313019	1.18	15.17	4.03				2.39	1.58	0.01	6.98	2.33	0.91	3.4		10		103	0		15.6	59					226	722	19.5	610	27	11.9	1585	45
2010	[14752] KARAOGLU ? (2010)	ANATOLIA-IRAN BELT - CENOZOIC/QUATERNARY / TURKEY / WESTERN ANATOLIAN VOLCANIC BELT / PYAMTEPE VOLCANIC UNIT/	29.3	38.8	35.3	VOLCANIC ROCK	NOT GIVEN			MIOCENE		61.46	0.994263	35.9799	39.8228	0.325419	1.13	14.95	4.13				2.27	1.38	0.02	6.72	2.21	0.87	4.4		10		102	0		16.5	60					233	716	19.9	560	25.9	15.3	1543	43
2019	[23051] ERK躄 F. (2019)	ANATOLIA-IRAN BELT - CENOZOIC/QUATERNARY / TURKEY / WESTERN ANATOLIAN VOLCANIC BELT / YAGCIK諽 VOLCANIC COMPLEX / CEPNI BASALTIC TRACHYANDESITE	29.874	38.609	35.3	VOLCANIC ROCK	TRACHYANDESITE, BASALTIC			MIOCENE		58.93	0.829995	52.0714	34.6587	0.138546	0.83	15.65	5.75				4.18	1.54	0.03	5.87	2.98	0.62	3		13		115			61	15	37	61	18		202	1458	28	369	25	9	2600	72.8
2003	[10668] AYDAR E. (2003)	ANATOLIA-IRAN BELT - CENOZOIC/QUATERNARY / TURKEY / WESTERN ANATOLIAN VOLCANIC BELT / AFYON/	30	38	36.79	VOLCANIC ROCK	TRACHYANDESITE	8500000	14500000	MIOCENE		62.3	0.896069	34.3704	35.8078	0.162716	0.78	16.59	4.58				4.08	1.29	0.05	3.99	4.12	0.29	0.56				82	34		20	22			21		151	928	27	290	35		1340
2003	[10668] AYDAR E. (2003)	ANATOLIA-IRAN BELT - CENOZOIC/QUATERNARY / TURKEY / WESTERN ANATOLIAN VOLCANIC BELT / AFYON/	30	38	36.79	VOLCANIC ROCK	TRACHYANDESITE	8500000	14500000	MIOCENE		61.95	0.917537	35.4828	27.6626	0.148688	0.82	17.31	4.92				4.15	0.95	0.04	4.03	4.23	0.31	0.66				82	43		15	20			21		153	1029	29	312	35		1415
1998	[10753] TEMEL A. (1998)	ANATOLIA-IRAN BELT - CENOZOIC/QUATERNARY / TURKEY / CENTRAL ANATOLIAN VOLCANIC BELT / ERENKAYA IGNIMBRITE/	32.5	38.17	37.06	VOLCANIC ROCK	ANDESITE	9000000	9900000	MIOCENE		61.16	0.952176	26.0046	43.2874	0.201405	0.69	17.15	5.89				5.41	2.27	0.11	3.1	2.93	0.23	1.87				75.1	18.2		12.5	11.1			17.1		114.7	569.5	21.9	174.6	13.3		848.3
1998	[10753] TEMEL A. (1998)	ANATOLIA-IRAN BELT - CENOZOIC/QUATERNARY / TURKEY / CENTRAL ANATOLIAN VOLCANIC BELT / ERENKAYA IGNIMBRITE/	32.5	38.17	37.06	VOLCANIC ROCK	ANDESITE	9000000	9900000	MIOCENE		61.27	0.907222	26.8679	41.7903	0.202247	0.67	16.79	5.6				5.32	2.03	0.82	3.01	3.39	0.21	0.73				74.5	9.6		20.8	6.4			17.3		115.2	569.6	21.2	180.8	11.4		953.7
1998	[10753] TEMEL A. (1998)	ANATOLIA-IRAN BELT - CENOZOIC/QUATERNARY / TURKEY / CENTRAL ANATOLIAN VOLCANIC BELT / ERENKAYA IGNIMBRITE/	32.5	38.17	37.06	VOLCANIC ROCK	ANDESITE	9000000	9900000	MIOCENE		61.3	0.940858	26.4649	39.9311	0.157938	0.67	17.25	5.75				5.27	1.93	0.093	2.98	3.36	0.22	0.9				79.6	10.6		12.5	7.1			17.6		95.3	603.4	22.8	169.5	11.8		988.7
1998	[10753] TEMEL A. (1998)	ANATOLIA-IRAN BELT - CENOZOIC/QUATERNARY / TURKEY / CENTRAL ANATOLIAN VOLCANIC BELT / KIZIL諶EN IGNIMBRITE/	32.5	38.17	37.06	VOLCANIC ROCK	DACITE	10900000	10900000	MIOCENE		65.82	0.989298	52.6458	39.197	0.184276	0.35	15.34	2.98				3.33	0.97	0.078	3.58	3.39	0.17	2.49				33.9	7.4		26.9	5.8			17.2		139.7	758.1	14.4	159.2	24.8		894.3
1998	[10753] TEMEL A. (1998)	ANATOLIA-IRAN BELT - CENOZOIC/QUATERNARY / TURKEY / CENTRAL ANATOLIAN VOLCANIC BELT//	32.5	38.17	37.06	VOLCANIC ROCK	DACITE	3350000	10900000	NEOGENE		67.66	0.964011	22.5392	42.7978	0.342323	0.35	14.94	3.6				3.43	1.36	0.07	3.83	3.11	0.22	1.69				55.6	72.3		6	11.3			17.9		157.4	459.8	20.4	182.3	23		879.4
1998	[10753] TEMEL A. (1998)	ANATOLIA-IRAN BELT - CENOZOIC/QUATERNARY / TURKEY / CENTRAL ANATOLIAN VOLCANIC BELT//	32.5	38.17	37.06	VOLCANIC ROCK	DACITE	3350000	10900000	NEOGENE		66.7	0.999106	21.607	43.5654	0.337094	0.46	15.31	3.72				3.36	1.45	0.064	3.65	3.2	0.18	0.94				61.2	17.1		12.7	9.2			16		146.4	434.3	20.1	163.2	17.7		964.1
1998	[10753] TEMEL A. (1998)	ANATOLIA-IRAN BELT - CENOZOIC/QUATERNARY / TURKEY / CENTRAL ANATOLIAN VOLCANIC BELT//	32.5	38.17	37.06	VOLCANIC ROCK	DACITE	3350000	10900000	NEOGENE		65.16	0.946936	52.9653	33.8297	0.110662	0.49	16.67	3.99				4.08	1.03	0.085	3.21	4.08	0.22	0.44				57.1	10		11.6	9			18.1		101.4	916.3	17.3	174.7	19.5		1332.3
1998	[10753] TEMEL A. (1998)	ANATOLIA-IRAN BELT - CENOZOIC/QUATERNARY / TURKEY / CENTRAL ANATOLIAN VOLCANIC BELT//	32.5	38.17	37.06	VOLCANIC ROCK	ANDESITE	3350000	10900000	NEOGENE		59.96	0.880339	24.2519	41.2278	0.12858	0.83	17.72	6.55				6.1	2.32	0.1	2.59	3.79	0.34	0.64				123.4	11.1		20.4	10			19.8		81.7	635.4	26.2	218.3	14.7		991.7
1998	[10753] TEMEL A. (1998)	ANATOLIA-IRAN BELT - CENOZOIC/QUATERNARY / TURKEY / CENTRAL ANATOLIAN VOLCANIC BELT//	32.5	38.17	37.06	VOLCANIC ROCK	DACITE	3350000	10900000	NEOGENE		63.47	0.907072	29.8483	42.6504	0.180216	0.58	16.47	4.9				4.77	1.84	0.154	3.17	3.68	0.24	0.66				86.4	13.2		18.7	7.4			17.3		113.5	629.8	21.1	181.5	11.2		1091.6
1998	[10753] TEMEL A. (1998)	ANATOLIA-IRAN BELT - CENOZOIC/QUATERNARY / TURKEY / CENTRAL ANATOLIAN VOLCANIC BELT//	32.5	38.17	37.06	VOLCANIC ROCK	ANDESITE	3350000	10900000	NEOGENE		62.24	0.899543	37.1659	41.0985	0.145632	0.66	16.44	5.62				5	1.98	0.074	3.41	3.34	0.22	0.82				104.4	24.4		17.2	12.3			16.4		120.7	828.8	22.3	171.3	12.9		1113.9
1998	[10753] TEMEL A. (1998)	ANATOLIA-IRAN BELT - CENOZOIC/QUATERNARY / TURKEY / CENTRAL ANATOLIAN VOLCANIC BELT//	32.5	38.17	37.06	VOLCANIC ROCK	ANDESITE			NEOGENE		59.51	0.88312	33.9363	39.729	0.105189	0.9	17.24	6.67				6.1	2.22	0.112	2.85	3.25	0.27	0.6				127.9	15.9		17.6	8.8			17.8		89.6	851.8	25.1	171.2	12.9		1223.6
1998	[10753] TEMEL A. (1998)	ANATOLIA-IRAN BELT - CENOZOIC/QUATERNARY / TURKEY / CENTRAL ANATOLIAN VOLCANIC BELT//	32.5	38.17	37.06	VOLCANIC ROCK	ANDESITE			NEOGENE		58.78	0.85332	35.6064	43.4984	0.100383	0.78	17.11	6.74				6.43	2.62	0.09	2.8	3.24	0.28	0.71				145.7	22.8		27.2	8.6			17.5		89	886.6	24.9	166.4	13.1		1413.7
1998	[10753] TEMEL A. (1998)	ANATOLIA-IRAN BELT - CENOZOIC/QUATERNARY / TURKEY / CENTRAL ANATOLIAN VOLCANIC BELT//	32.5	38.17	37.06	VOLCANIC ROCK	ANDESITE			NEOGENE		58.86	0.971436	33.696	39.3716	0.121676	0.76	16.88	6.13				4.87	2.01	0.091	3.01	3.2	0.25	1.68				129.1	35.2		18.2	12.1			17.3		102.5	842.4	25	188.2	14		831.39
1998	[10753] TEMEL A. (1998)	ANATOLIA-IRAN BELT - CENOZOIC/QUATERNARY / TURKEY / CENTRAL ANATOLIAN VOLCANIC BELT//	32.5	38.17	37.06	VOLCANIC ROCK	DACITE			NEOGENE		67.18	0.933627	53.2222	42.3224	0.139875	0.34	15.1	2.78				3.52	1.03	0.063	3.68	3.52	0.12	1.92				5.9	9.2		15.8	8			15.2		93.8	670.6	12.6	141.9	11.2		1478.3
1998	[10753] TEMEL A. (1998)	ANATOLIA-IRAN BELT - CENOZOIC/QUATERNARY / TURKEY / CENTRAL ANATOLIAN VOLCANIC BELT//	32.5	38.17	37.06	VOLCANIC ROCK	DACITE			NEOGENE		67.8	0.989138	49.0929	41.4973	0.125855	0.34	15.46	2.82				3.12	1.01	0.066	3.5	3.75	0.12	0.99				42.2	9.2		13	7.8			16.1		86.5	687.3	14	138.8	14.5		1587
1998	[10753] TEMEL A. (1998)	ANATOLIA-IRAN BELT - CENOZOIC/QUATERNARY / TURKEY / CENTRAL ANATOLIAN VOLCANIC BELT//	32.5	38.17	37.06	VOLCANIC ROCK	DACITE			NEOGENE		65.66	0.928318	37.0355	43.4564	0.138569	0.4	16.38	3.35				4.38	1.3	0.092	3.23	3.76	0.2	1.34				46.4	9.1		14.3	8			17.8		101.1	729.6	19.7	172.2	23.1		1276.6
1998	[10753] TEMEL A. (1998)	ANATOLIA-IRAN BELT - CENOZOIC/QUATERNARY / TURKEY / CENTRAL ANATOLIAN VOLCANIC BELT//	32.5	38.17	37.06	VOLCANIC ROCK	ANDESITE			NEOGENE		57.51	0.84164	28.7544	43.9338	0.090299	0.88	17.6	7.38				7.25	2.92	0.126	2.02	3.37	0.23	0.27				151.9	23.4		29	8.9			17.7		59.2	655.6	22.8	138.1	8.8		778.8
1998	[10753] TEMEL A. (1998)	ANATOLIA-IRAN BELT - CENOZOIC/QUATERNARY / TURKEY / CENTRAL ANATOLIAN VOLCANIC BELT//	32.5	38.17	37.06	VOLCANIC ROCK	DACITE			NEOGENE		65.63	0.958965	28.0476	42.3137	0.218449	0.36	15.32	3.24				3.65	1.2	0.082	2.99	3.71	0.15	2.2				47.8	9.5		9	5.6			16.8		115.8	530.1	18.9	144.2	14.8		883
1998	[10753] TEMEL A. (1998)	ANATOLIA-IRAN BELT - CENOZOIC/QUATERNARY / TURKEY / CENTRAL ANATOLIAN VOLCANIC BELT//	32.5	38.17	37.06	VOLCANIC ROCK	DACITE			NEOGENE		65.92	0.99851	29.4576	41.1884	0.214423	0.39	15.88	3.45				3.71	1.22	0.084	2.99	3.6	0.15	2.17				48.4	8.2		17.9	5.3			16.5		111.8	521.4	17.7	136.2	14.7		904.1
2008	[13539] AYDIN F. (2008)	ANATOLIA-IRAN BELT - CENOZOIC/QUATERNARY / TURKEY / CENTRAL ANATOLIAN VOLCANIC BELT / CINARLI/	34.1	38.2	35.13	VOLCANIC ROCK	ANDESITE			NEOGENE		63.63	0.901937	17.5362	43.1625	0.180781	0.57	16.63	4.59				5.74	1.76	0.06	2.18	3.43	0.22	1.1					109.5			65					74.5	412.1	23.5	130.4	9.3		417.2	34.4
1998	[10746] DENIEL C. (1998)	ANATOLIA-IRAN BELT - CENOZOIC/QUATERNARY / TURKEY / CENTRAL ANATOLIAN VOLCANIC BELT / HASANDAG / HASANDAG PALEOVOLCANO	34.18	38.13	35.13	VOLCANIC ROCK	ANDESITE	7000000	7000000	MIOCENE		56.46	0.818349	10.0345	41.8797	0.0790378	0.94	17.02	9.18				7.88	3.34	0.13	1.1	3.21	0.25			28		290	18			24					23	291	29	118	6		372	22.2
2014	[19015] AYDIN F.(2014) [GeoReM [7900] ]	ANATOLIA-IRAN BELT - CENOZOIC/QUATERNARY / TURKEY / CENTRAL ANATOLIAN VOLCANIC BELT / NIGDE/	34.2775	38.1181	35.13	VOLCANIC ROCK	RHYOLITE			QUATERNARY		67.8	0.978878	18.75	44.5989	0.396296	0.39	15	2.78				2.99	1.13	0.06	3.01	4.03	0.1	2.6		5		38	3801.2		17.6	0	15	7	14.8		107	270	14.4	174	10.6	4	630	28.6
1998	[10747] K躌KC躉GLU B. (1998)	ANATOLIA-IRAN BELT - CENOZOIC/QUATERNARY / TURKEY / CENTRAL ANATOLIAN VOLCANIC BELT / ERCIYES / KOCADAG VOLCANICS	35.45	38.53	35.41	VOLCANIC ROCK	ANDESITE			QUATERNARY		60.19	0.889999	12.2175	44.5485	0.0728142	1.02	17.18	6.73				6.11	2.73	0.11	1.75	3.83	0.35					106.2	24.6		41.7	17			22.6		27.4	376.3	30.8	234.5	20.2		483.4
1998	[10747] K躌KC躉GLU B. (1998)	ANATOLIA-IRAN BELT - CENOZOIC/QUATERNARY / TURKEY / CENTRAL ANATOLIAN VOLCANIC BELT / ERCIYES / KOCADAG VOLCANICS	35.45	38.53	35.41	VOLCANIC ROCK	NOT GIVEN			QUATERNARY		66.49	0.947136	6.04524	29.9597	0.38204	0.84	15.84	4.63				3.26	1	0.09	3.06	4.55	0.22					56.4	4.1		51.5	5.8			22.1		97	253.9	42	367.8	18.2		563.4	25.3
1998	[10747] K躌KC躉GLU B. (1998)	ANATOLIA-IRAN BELT - CENOZOIC/QUATERNARY / TURKEY / CENTRAL ANATOLIAN VOLCANIC BELT / ERCIYES / KOCADAG VOLCANICS	35.45	38.53	35.41	VOLCANIC ROCK	NOT GIVEN			QUATERNARY		62.04	0.879142	10.1568	39.0587	0.212059	1.15	16.33	6.52				5.03	2.11	0.11	2.04	4.39	0.3					119.3	8		34.4	11.4			23.4		72.8	343.3	33.8	258.2	16.8		456.8
2013	[17167] DOGAN A. U. (2013)	ANATOLIA-IRAN BELT - CENOZOIC/QUATERNARY / TURKEY / CENTRAL ANATOLIAN VOLCANIC BELT / ERCIYES / NEW ERCIYES STAGE	35.45	38.53	35.41	VOLCANIC ROCK	DACITE		900000	QUATERNARY		67.03	0.906623	12.5592	44.3605	0.30566	0.51	15.76			3.89		4.69	1.74	0.06	2.27	3.89	0.15	1.2		8		55	21		10	9	12	13	17	1.6	81	265	21.1	162	11.1	1.7	453	24.8
2004	[15684] K躌KC躉GLU B. (2004)	ANATOLIA-IRAN BELT - CENOZOIC/QUATERNARY / TURKEY / CENTRAL ANATOLIAN VOLCANIC BELT / ERCIYES/	35.45	38.53	35.41	VOLCANIC ROCK	DACITE			QUATERNARY		62.25	0.895646	8.18956	37.2554	0.295203	0.93	15.75	5.17				4.08	1.55	0.082	3.01	4.2	0.25	0.99				78.4	61.2		22.6	8.1			21.5		88	298.1	36.4	331.2	17.7		486.8
2004	[15684] K躌KC躉GLU B. (2004)	ANATOLIA-IRAN BELT - CENOZOIC/QUATERNARY / TURKEY / CENTRAL ANATOLIAN VOLCANIC BELT / ERCIYES/	35.45	38.53	35.41	VOLCANIC ROCK	DACITE			QUATERNARY		63.72	0.929194	7.66925	31.6117	0.293127	0.95	16.07	5.27				3.85	1.23	0.081	2.52	4.6	0.24	1.28				85.6	52.1		32	10.5			22.1		87	296.8	38.7	332.4	17.8		522.3
2011	[15761] DOGAN A. U. (2011)	ANATOLIA-IRAN BELT - CENOZOIC/QUATERNARY / TURKEY / CENTRAL ANATOLIAN VOLCANIC BELT / ERCIYES/	35.9	38.6	35.41	VOLCANIC ROCK	DACITE			NEOGENE		66	0.921238	11.4798	44.174	0.339844	0.48	15.51	4.33				4.32	1.73	0.06	2.31	3.94	0.11	0.6		8		59			10	8	11	12	18	2.5	87	256	22.3	155	10.6	4.3	436	24.9
2011	[15761] DOGAN A. U. (2011)	ANATOLIA-IRAN BELT - CENOZOIC/QUATERNARY / TURKEY / CENTRAL ANATOLIAN VOLCANIC BELT / ERCIYES/	35.9	38.6	35.41	VOLCANIC ROCK	DACITE			NEOGENE		66.76	0.932515	11.4612	42.4415	0.346614	0.46	15.32	4.19				4.12	1.56	0.06	2.3	3.92	0.13	0.6		8		50			9	9	16	18	17	1	87	251	21.9	161	10.7	3	442	25.3
2021	[25434] FURMAN T. (2021)	ANATOLIA-IRAN BELT - CENOZOIC/QUATERNARY / TURKEY / CENTRAL ANATOLIAN VOLCANIC BELT//	35.5	38.8	35.41	VOLCANIC ROCK	NOT GIVEN			MIO-PLIOCENE		61.78	0.853284	30.5195	42.9779	0.122553	0.72	17.13	4.94				5.72	1.88	0.07	2.48	4.25	0.22	1.64		9.9		91.9	34		32.7	18.4					57.6	470	15.4	119	15.5	1.06	401	23.31
2021	[25434] FURMAN T. (2021)	ANATOLIA-IRAN BELT - CENOZOIC/QUATERNARY / TURKEY / CENTRAL ANATOLIAN VOLCANIC BELT//	35.5	38.8	35.41	VOLCANIC ROCK	NOT GIVEN			MIO-PLIOCENE		61.27	0.877354	17.2047	32.4072	0.171854	0.74	17.96	5.37				5.61	1.3	0.06	2.65	4.5	0.2	1.37		10.3		187.8	4		43.7	5.4					75.1	437	25.4	150	12.2	2.42	438	28.16
2021	[25434] FURMAN T. (2021)	ANATOLIA-IRAN BELT - CENOZOIC/QUATERNARY / TURKEY / CENTRAL ANATOLIAN VOLCANIC BELT//	35.5	38.8	35.41	VOLCANIC ROCK	NOT GIVEN			MIO-PLIOCENE		60.34	0.893919	18.6722	30.2531	0.18	0.76	18.11	5.89				4.82	1.29	0.1	3.28	4.83	0.22	1.39		7.4		87.8	4		26.8	1.6					81	450	24.1	154	16.4	1.32	473	31.76
2020	[23722] LIN YU-CHIN (2020)	ANATOLIA-IRAN BELT - CENOZOIC/QUATERNARY / TURKEY / EASTERN ANATOLIAN VOLCANIC BELT / ADAMKIRAN/	37.6716	38.3458	36.54	VOLCANIC ROCK	TRACHYANDESITE			MIOCENE		62.62	0.925047	20.0709	43.2488	0.385159	0.72	16.17	4.34				4.5	1.67	0.03	2.39	4.08	0.17	2.13		7.6		69.5	46		7.6	22.6	23.7		19.1		109	283	14.1	152	8.3	5.99	323	21.6
1998	[10752] YALCIN H. (1998)	ANATOLIA-IRAN BELT - CENOZOIC/QUATERNARY / TURKEY / EASTERN ANATOLIAN VOLCANIC BELT / YAMADAG / SUSUZDAG VOLCANICS	37.89	38.95	36.54	VOLCANIC ROCK	ANDESITE			MIOCENE		58.78	0.876666	10.0333	32.3576	0.189369	0.98	17.75	6.5				5.8	1.57	0.06	1.79	4.72	0.28	1.47		19		121	5		17	5	26	98			57	301	30	266	6		365	24.2
1998	[10752] YALCIN H. (1998)	ANATOLIA-IRAN BELT - CENOZOIC/QUATERNARY / TURKEY / EASTERN ANATOLIAN VOLCANIC BELT / YAMADAG / SUSUZDAG VOLCANICS	37.89	38.95	36.54	VOLCANIC ROCK	ANDESITE			MIOCENE		59.31	0.952267	28	44.6555	0.0657895	0.64	18.48	5.94				6.87	2.42	0.12	1.45	3.25	0.16	0.91				112	12		17	12	17	46			35	532	19	12	8		277
1998	[10752] YALCIN H. (1998)	ANATOLIA-IRAN BELT - CENOZOIC/QUATERNARY / TURKEY / EASTERN ANATOLIAN VOLCANIC BELT / YAMADAG / SUSUZDAG VOLCANICS	37.89	38.95	36.54	VOLCANIC ROCK	DACITE			MIOCENE		67.11	0.915833	17.8	21.1692	0.0842697	0.65	14.35	4.72				4.77	0.64	0.05	1.57	3.22	0.16	2.02				124	21		10	7	35	63			30	356	20	13	11		362
1998	[10752] YALCIN H. (1998)	ANATOLIA-IRAN BELT - CENOZOIC/QUATERNARY / TURKEY / EASTERN ANATOLIAN VOLCANIC BELT / YAMADAG / SUSUZDAG VOLCANICS	37.89	38.95	36.54	VOLCANIC ROCK	ANDESITE			MIOCENE		59.52	0.937223	25.3333	35.6893	0.0902256	0.71	17.84	5.71				6.47	1.6	0.07	1.87	3.19	0.16	1.94				90	40		16	9	27	56			48	532	21	142	8		312
1998	[10752] YALCIN H. (1998)	ANATOLIA-IRAN BELT - CENOZOIC/QUATERNARY / TURKEY / EASTERN ANATOLIAN VOLCANIC BELT / YAMADAG / SUSUZDAG VOLCANICS	37.89	38.95	36.54	VOLCANIC ROCK	ANDESITE			MIOCENE		57.43	0.950693	11.3793	32.5006	0.133333	0.8	19.41	6.54				6.96	1.59	0.09	1.29	3.87	0.24	0.68				93	9		19	8	3	40			44	330	29	156	6		260
1998	[10752] YALCIN H. (1998)	ANATOLIA-IRAN BELT - CENOZOIC/QUATERNARY / TURKEY / EASTERN ANATOLIAN VOLCANIC BELT / YAMADAG / SUSUZDAG VOLCANICS	37.89	38.95	36.54	VOLCANIC ROCK	DACITE			MIOCENE		66.38	0.994784	22.1667	22.8841	0.203008	0.52	16.25	3.07				3.82	0.46	0.03	2.14	4.3	0.15	0.96				58	24		11	20	45	82			81	399	18	189	7		324
1998	[10752] YALCIN H. (1998)	ANATOLIA-IRAN BELT - CENOZOIC/QUATERNARY / TURKEY / EASTERN ANATOLIAN VOLCANIC BELT / YAMADAG / SUSUZDAG VOLCANICS	37.89	38.95	36.54	VOLCANIC ROCK	ANDESITE, BASALTIC			MIOCENE		56.56	0.848363	20.25	31.7355	0.102293	1.33	17.69	7.37				6.18	1.73	0.12	2.06	4.49	0.47	0.47				120	27		21	22	14	58			58	567	28	274	25		414
1998	[10752] YALCIN H. (1998)	ANATOLIA-IRAN BELT - CENOZOIC/QUATERNARY / TURKEY / EASTERN ANATOLIAN VOLCANIC BELT / YAMADAG / SUSUZDAG VOLCANICS	37.89	38.95	36.54	VOLCANIC ROCK	DACITE			MIOCENE		63.73	0.862754	27.5625	41.5117	0.104308	0.58	16.7	4.66				5.3	1.67	0.07	0.88	5.33	0.35	0.64				60	46		15	16	14	97			46	441	16	314	16		362
1998	[10752] YALCIN H. (1998)	ANATOLIA-IRAN BELT - CENOZOIC/QUATERNARY / TURKEY / EASTERN ANATOLIAN VOLCANIC BELT / YAMADAG / SUSUZDAG VOLCANICS	37.89	38.95	36.54	VOLCANIC ROCK	DACITE			MIOCENE		63.72	0.91788	16.72	37.7098	0.069378	0.61	16.37	4.58				5.09	1.4	0.08	1.24	4.4	0.41	0.39				65	20		13	13	18	99			29	418	25	315	18		332
1998	[10752] YALCIN H. (1998)	ANATOLIA-IRAN BELT - CENOZOIC/QUATERNARY / TURKEY / EASTERN ANATOLIAN VOLCANIC BELT / YAMADAG / SUSUZDAG VOLCANICS	37.89	38.95	36.54	VOLCANIC ROCK	ANDESITE			MIOCENE		59.82	0.971284	10.4091	39.5522	0.266376	0.73	17.93	6.78				5.93	2.24	0.16	1.79	3.49	0.19	1.25				80	33		24	10	32	56			61	229	22	102	7		248
1998	[10752] YALCIN H. (1998)	ANATOLIA-IRAN BELT - CENOZOIC/QUATERNARY / TURKEY / EASTERN ANATOLIAN VOLCANIC BELT / YAMADAG / SUSUZDAG VOLCANICS	37.89	38.95	36.54	VOLCANIC ROCK	DACITE			MIOCENE		65.45	0.952299	21.7647	32.7042	0.118919	0.52	16.26	3.79				4.62	0.93	0.06	1.54	4.26	0.3	0.81				56	20		10	10	26	80			44	370	17	267	18		466
1998	[10752] YALCIN H. (1998)	ANATOLIA-IRAN BELT - CENOZOIC/QUATERNARY / TURKEY / EASTERN ANATOLIAN VOLCANIC BELT / YAMADAG / SUSUZDAG VOLCANICS	37.89	38.95	36.54	VOLCANIC ROCK	DACITE			MIOCENE		66.4	0.895482	20.9444	39.2279	0.116711	0.53	15.85	4.05				4.79	1.32	0.06	1.27	4.63	0.3	0.42				58	25		12	12	31	93			44	377	18	266	20		352
1998	[10752] YALCIN H. (1998)	ANATOLIA-IRAN BELT - CENOZOIC/QUATERNARY / TURKEY / EASTERN ANATOLIAN VOLCANIC BELT / YAMADAG / SUSUZDAG VOLCANICS	37.89	38.95	36.54	VOLCANIC ROCK	ANDESITE			MIOCENE		60.47	0.977452	10	33.8146	0.272727	0.77	17.98	6.9				5.78	1.78	0.08	1.86	3.57	0.2	0.92				85	8		25	12	11	53			60	220	22	109	8		274
1998	[10752] YALCIN H. (1998)	ANATOLIA-IRAN BELT - CENOZOIC/QUATERNARY / TURKEY / EASTERN ANATOLIAN VOLCANIC BELT / YAMADAG / SUSUZDAG VOLCANICS	37.89	38.95	36.54	VOLCANIC ROCK	ANDESITE			MIOCENE		59.68	0.37759	9.73333	42.9747	0.219178	0.8	7.15	6.57				6.1	2.5	0.13	2.02	3.44	0.18	0.81				130	13		19	9	36	55			64	292	30	171	12		303
1998	[10752] YALCIN H. (1998)	ANATOLIA-IRAN BELT - CENOZOIC/QUATERNARY / TURKEY / EASTERN ANATOLIAN VOLCANIC BELT / YAMADAG / SUSUZDAG VOLCANICS	37.89	38.95	36.54	VOLCANIC ROCK	ANDESITE			MIOCENE		58.01	0.985089	26.5	41.622	0.115566	0.74	19.29	7.25				7.62	2.61	0.11	1.31	2.62	0.19	0.47				83	19		26	10	77	58			49	424	16	29	1		189
1998	[10752] YALCIN H. (1998)	ANATOLIA-IRAN BELT - CENOZOIC/QUATERNARY / TURKEY / EASTERN ANATOLIAN VOLCANIC BELT / YAMADAG / SUSUZDAG VOLCANICS	37.89	38.95	36.54	VOLCANIC ROCK	ANDESITE			MIOCENE		56.65	0.928177	14.15	44.5852	0.176678	0.81	18.9	6.72				7.61	2.73	0.12	1.06	3.27	0.21	0.37				83	63		24	14	32	87			50	283	20	88	2		315
1998	[10752] YALCIN H. (1998)	ANATOLIA-IRAN BELT - CENOZOIC/QUATERNARY / TURKEY / EASTERN ANATOLIAN VOLCANIC BELT / YAMADAG / SUSUZDAG VOLCANICS	37.89	38.95	36.54	VOLCANIC ROCK	DACITE			MIOCENE		64.44	0.931482	19.5	28.3717	0.153846	0.52	17.28	4.3				4.61	0.86	0	1.31	5.32	0.27	0.83				53	3		14	9	43	78			54	351	18	307	13		397
2020	[23722] LIN YU-CHIN (2020)	ANATOLIA-IRAN BELT - CENOZOIC/QUATERNARY / TURKEY / EASTERN ANATOLIAN VOLCANIC BELT//	38.9969	38.9826	38.5	VOLCANIC ROCK	TRACHYANDESITE			MIOCENE		60.23	0.922033	29.096	33.6971	0.215534	0.83	16.94	4.91				4.55	1.26	0.04	2.72	4.35	0.25	1.27		6.3		79.3	32		11.9	23.6	19.5	203	22		111	515	17.7	218	17.7	5.03	594	38.5
2020	[23722] LIN YU-CHIN (2020)	ANATOLIA-IRAN BELT - CENOZOIC/QUATERNARY / TURKEY / EASTERN ANATOLIAN VOLCANIC BELT//	39.0439	38.9921	38.62	VOLCANIC ROCK	TRACHYTE			MIOCENE		66.58	0.995006	27.6378	31.4884	0.396011	0.38	15.96	2.37				3.26	0.55	0.02	2.96	4.2	0.13	1.57		1		49	46		6.7	25.5	28.5	61.8	22		139	351	12.7	154	10.5	8.7	498	32.5
2012	[15775] CUBUKCU H. E. (2012)	ANATOLIA-IRAN BELT - CENOZOIC/QUATERNARY / TURKEY / EASTERN ANATOLIAN VOLCANIC BELT / NEMRUT / POST-CALDERA STAGE	42.2	38.67	39.15	VOLCANIC ROCK	BENMOREITE			QUATERNARY		57.1156	0.820619	8.19728	34.4814	0.129372	1.56302	17.1947	8.52186				5.5262	2.26456	0.187733	2.01875	5.30135	0.532292	0.130026				75.63	4.686		68.4	4.9	8.701	103.3	24.09		43.65	337.4	41.16	360.1	17.25	1.963	430.8	28.01
2012	[15775] CUBUKCU H. E. (2012)	ANATOLIA-IRAN BELT - CENOZOIC/QUATERNARY / TURKEY / EASTERN ANATOLIAN VOLCANIC BELT / NEMRUT / POST-CALDERA STAGE	42.2	38.67	39.15	VOLCANIC ROCK	TRACHYTE			QUATERNARY		60.629	0.855289	5.36888	17.9383	0.285293	0.735	16.749	5.735				3.352	0.633	0.167	3.697	5.767	0.178	0.865				32.17	9.06		18.34	6.077	6.542	91.14	25.48		53.15	186.3	34.7	266.2	16.61	1.268	863.4	26.95
2012	[15775] CUBUKCU H. E. (2012)	ANATOLIA-IRAN BELT - CENOZOIC/QUATERNARY / TURKEY / EASTERN ANATOLIAN VOLCANIC BELT / NEMRUT / SYN-CALDERA STAGE (NEMRUT IGNIMBRITE)	42.2	38.67	39.15	VOLCANIC ROCK	TRACHYTE			QUATERNARY		62.397	0.918134	4.52161	15.0685	0.3882	0.54	16.964	4.733				2.432	0.424	0.149	4.082	5.858	0.118	1.441				10	0		10.28	3.496	3.227	83.79	25.52		58.89	151.7	33.55	297.4	18.41	2.027	952.3	27.81
1995	[10755] NOTSU K. (1995)	ANATOLIA-IRAN BELT - CENOZOIC/QUATERNARY / TURKEY / EASTERN ANATOLIAN VOLCANIC BELT / SUPHAN DAG/	42.98	38.92	39.15	VOLCANIC ROCK	ANDESITE			QUATERNARY		59.06	0.816133	5.78571	36.4694	0.263374	1.56	16.08			7.39		5.09	2.38	0.13	2.13	4.95	0.26			15.8			5.9		20						64	243	42	288	7		344	22.6
2011	[15624] 諾DEMIR Y. (2011)	ANATOLIA-IRAN BELT - CENOZOIC/QUATERNARY / TURKEY / EASTERN ANATOLIAN VOLCANIC BELT / SUPHAN DAG/	42.98	38.92	39.15	VOLCANIC ROCK	TRACHYANDESITE			QUATERNARY		58.86	0.824214	4.79913	36.0256	0.365332	1.68	15.81	8.3				4.99	2.36	0.13	2.44	4.54	0.282	0.4		17					25.1	4.7			19.7		80.3	219.8	45.8	303.8	9.5	2.8	308	22
2011	[15624] 諾DEMIR Y. (2011)	ANATOLIA-IRAN BELT - CENOZOIC/QUATERNARY / TURKEY / EASTERN ANATOLIAN VOLCANIC BELT / SUPHAN DAG/	42.98	38.92	39.15	VOLCANIC ROCK	TRACHYANDESITE			QUATERNARY		57.23	0.736293	5.12727	35.2549	0.341755	1.74	15.08	8.62				5.97	2.37	0.13	2.45	4.24	0.28	1.7		17					25.4	5			19.7		77.1	225.6	44	299.5	9.3	2.8	293	21.3
2011	[15624] 諾DEMIR Y. (2011)	ANATOLIA-IRAN BELT - CENOZOIC/QUATERNARY / TURKEY / EASTERN ANATOLIAN VOLCANIC BELT / SUPHAN DAG/	42.98	38.92	39.15	VOLCANIC ROCK	TRACHYANDESITE			QUATERNARY		58.62	0.777978	5.53938	39.469	0.301163	1.19	15.76	7.32				5.73	2.41	0.13	2.51	4.33	0.296	1.5		17					16.7	4.2			18.6		69.9	232.1	41.9	278.3	11.7	2.8	315	24.8
2011	[15624] 諾DEMIR Y. (2011)	ANATOLIA-IRAN BELT - CENOZOIC/QUATERNARY / TURKEY / EASTERN ANATOLIAN VOLCANIC BELT / SUPHAN DAG/	42.98	38.92	39.15	VOLCANIC ROCK	TRACHYANDESITE			QUATERNARY		58.32	0.845255	6.64444	37.1581	0.231187	1.59	16.26	8.34				5.43	2.49	0.13	2.01	4.37	0.28	0.6		16					22	1.8			18.8		55.3	239.2	36	228.3	9.6	2.2	311	20.3
2011	[15624] 諾DEMIR Y. (2011)	ANATOLIA-IRAN BELT - CENOZOIC/QUATERNARY / TURKEY / EASTERN ANATOLIAN VOLCANIC BELT / SUPHAN DAG/	42.98	38.92	39.15	VOLCANIC ROCK	TRACHYANDESITE			QUATERNARY		56.94	0.807428	6.57218	37.2968	0.214058	1.7	16.13	8.89				5.99	2.67	0.14	1.89	4.28	0.292	0.9		17					23.2	2.5			19.6		53.6	250.4	38.1	238.5	10.1	2.1	297	19.5
2011	[15624] 諾DEMIR Y. (2011)	ANATOLIA-IRAN BELT - CENOZOIC/QUATERNARY / TURKEY / EASTERN ANATOLIAN VOLCANIC BELT / SUPHAN DAG/	42.98	38.92	39.15	VOLCANIC ROCK	TRACHYANDESITE			QUATERNARY		60.31	0.870851	6.7478	39.8315	0.282051	1.29	16.53	7.18				5.11	2.4	0.12	2.19	4.45	0.26	0.1		16					23.9	3.6			17.8		64.9	230.1	34.1	236.1	9.2	1.6	319.6	21
2011	[15624] 諾DEMIR Y. (2011)	ANATOLIA-IRAN BELT - CENOZOIC/QUATERNARY / TURKEY / EASTERN ANATOLIAN VOLCANIC BELT / SUPHAN DAG/	42.98	38.92	39.15	VOLCANIC ROCK	TRACHYANDESITE			QUATERNARY		58.94	0.85208	6.16539	35.8873	0.255468	1.52	16.17	8.35				5.31	2.36	0.13	2.23	4.2	0.28	0.4		15					26.4	1.7			19.3		61.9	242.3	39.3	256.1	10.3	2.4	336.7	21.5
2011	[15624] 諾DEMIR Y. (2011)	ANATOLIA-IRAN BELT - CENOZOIC/QUATERNARY / TURKEY / EASTERN ANATOLIAN VOLCANIC BELT / SUPHAN DAG/	42.98	38.92	39.15	VOLCANIC ROCK	TRACHYTE			QUATERNARY		62.77	0.841803	4.89367	32.0936	0.361614	0.92	15.56	6.16				4.32	1.47	0.11	2.48	4.83	0.3	1		11					16.9	0.5			20.3		69.9	193.3	39.5	298.2	10.1	2.5	320.9	24.1
2011	[15624] 諾DEMIR Y. (2011)	ANATOLIA-IRAN BELT - CENOZOIC/QUATERNARY / TURKEY / EASTERN ANATOLIAN VOLCANIC BELT / SUPHAN DAG/	42.98	38.92	39.15	VOLCANIC ROCK	TRACHYTE			QUATERNARY		63.8	0.919704	4.92248	31.6969	0.379003	0.86	16.06	5.42				3.63	1.27	0.1	2.71	4.82	0.27	1		10					15.2	0.9			19.7		72.2	190.5	38.7	304.7	9.7	2.6	336.8	24
2011	[15624] 諾DEMIR Y. (2011)	ANATOLIA-IRAN BELT - CENOZOIC/QUATERNARY / TURKEY / EASTERN ANATOLIAN VOLCANIC BELT / SUPHAN DAG/	42.98	38.92	39.15	VOLCANIC ROCK	TRACHYTE			QUATERNARY		63.19	0.911648	4.91608	31.5238	0.348032	0.98	16.22	6.41				3.9	1.49	0.12	2.47	4.88	0.31	-0.2		11					17.5	0.6			20.3		73.4	210.9	42.9	317	10.5	2.6	345.1	24.7
2011	[15624] 諾DEMIR Y. (2011)	ANATOLIA-IRAN BELT - CENOZOIC/QUATERNARY / TURKEY / EASTERN ANATOLIAN VOLCANIC BELT / SUPHAN DAG/	42.98	38.92	39.15	VOLCANIC ROCK	DACITE			QUATERNARY		65.26	0.923576	5.41176	32.2853	0.391304	0.67	15.28	4.86				3.5	1.17	0.1	2.81	4.34	0.293	1.5		9					9.8	1.3			18.1		82.8	211.6	39.1	321.7	17.2	2.6	436	30.3
2011	[15624] 諾DEMIR Y. (2011)	ANATOLIA-IRAN BELT - CENOZOIC/QUATERNARY / TURKEY / EASTERN ANATOLIAN VOLCANIC BELT / SUPHAN DAG/	42.98	38.92	39.15	VOLCANIC ROCK	DACITE			QUATERNARY		63.31	0.880686	5.53213	33.5214	0.379182	0.88	15.31	5.97				4	1.52	0.11	2.67	4.39	0.46	1.2		10					13.4	1.3			18.3		81.6	215.2	38.9	262.8	15.7	2.6	398	28.9
2014	[18073] 諾DEMIR Y.(2014) [GeoReM [7896] ]	ANATOLIA-IRAN BELT - CENOZOIC/QUATERNARY / TURKEY / EASTERN ANATOLIAN VOLCANIC BELT / SUPHAN DAG/	42.98	38.92	39.15	VOLCANIC ROCK	TRACHYANDESITE			QUATERNARY		58.86	0.824214	4.79913	36.0256	0.365332	1.68	15.81	8.3				4.99	2.36	0.13	2.44	4.54	0.282	0.4		17					25.1	4.7			19.7		80.3	219.8	45.8	303.8	9.5	2.8	308	22
2014	[18073] 諾DEMIR Y.(2014) [GeoReM [7896] ]	ANATOLIA-IRAN BELT - CENOZOIC/QUATERNARY / TURKEY / EASTERN ANATOLIAN VOLCANIC BELT / SUPHAN DAG/	42.98	38.92	39.15	VOLCANIC ROCK	TRACHYANDESITE			QUATERNARY		57.23	0.736293	5.12727	35.2549	0.341755	1.74	15.08	8.62				5.97	2.37	0.13	2.45	4.24	0.28	1.7		17					25.4	5			19.7		77.1	225.6	44	299.5	9.3	2.8	293	21.3
2014	[18073] 諾DEMIR Y.(2014) [GeoReM [7896] ]	ANATOLIA-IRAN BELT - CENOZOIC/QUATERNARY / TURKEY / EASTERN ANATOLIAN VOLCANIC BELT / SUPHAN DAG/	42.98	38.92	39.15	VOLCANIC ROCK	TRACHYANDESITE			QUATERNARY		58.62	0.777978	5.53938	39.469	0.301163	1.19	15.76	7.32				5.73	2.41	0.13	2.51	4.33	0.296	1.5		17					16.7	4.2			18.6		69.9	232.1	41.9	278.3	11.7	2.8	315	24.8
2014	[18073] 諾DEMIR Y.(2014) [GeoReM [7896] ]	ANATOLIA-IRAN BELT - CENOZOIC/QUATERNARY / TURKEY / EASTERN ANATOLIAN VOLCANIC BELT / SUPHAN DAG/	42.98	38.92	39.15	VOLCANIC ROCK	TRACHYANDESITE			QUATERNARY		58.32	0.845255	6.64444	37.1581	0.231187	1.59	16.26	8.34				5.43	2.49	0.13	2.01	4.37	0.28	0.6		16					22	1.8			18.8		55.3	239.2	36	228.3	9.6	2.2	311	20.3
2014	[18073] 諾DEMIR Y.(2014) [GeoReM [7896] ]	ANATOLIA-IRAN BELT - CENOZOIC/QUATERNARY / TURKEY / EASTERN ANATOLIAN VOLCANIC BELT / SUPHAN DAG/	42.98	38.92	39.15	VOLCANIC ROCK	TRACHYANDESITE			QUATERNARY		56.94	0.807428	6.57218	37.2968	0.214058	1.7	16.13	8.89				5.99	2.67	0.14	1.89	4.28	0.292	0.9		17					23.2	2.5			19.6		53.6	250.4	38.1	238.5	10.1	2.1	297	19.5
2014	[18073] 諾DEMIR Y.(2014) [GeoReM [7896] ]	ANATOLIA-IRAN BELT - CENOZOIC/QUATERNARY / TURKEY / EASTERN ANATOLIAN VOLCANIC BELT / SUPHAN DAG/	42.98	38.92	39.15	VOLCANIC ROCK	TRACHYANDESITE			QUATERNARY		60.31	0.870851	6.7478	39.8315	0.282051	1.29	16.53	7.18				5.11	2.4	0.12	2.19	4.45	0.26	0.1		16					23.9	3.6			17.8		64.9	230.1	34.1	236.1	9.2	1.6	319.6	21
2014	[18073] 諾DEMIR Y.(2014) [GeoReM [7896] ]	ANATOLIA-IRAN BELT - CENOZOIC/QUATERNARY / TURKEY / EASTERN ANATOLIAN VOLCANIC BELT / SUPHAN DAG/	42.98	38.92	39.15	VOLCANIC ROCK	TRACHYANDESITE			QUATERNARY		58.94	0.85208	6.16539	35.8873	0.255468	1.52	16.17	8.35				5.31	2.36	0.13	2.23	4.2	0.28	0.4		15					26.4	1.7			19.3		61.9	242.3	39.3	256.1	10.3	2.4	336.7	21.5
2014	[18073] 諾DEMIR Y.(2014) [GeoReM [7896] ]	ANATOLIA-IRAN BELT - CENOZOIC/QUATERNARY / TURKEY / EASTERN ANATOLIAN VOLCANIC BELT / SUPHAN DAG/	42.98	38.92	39.15	VOLCANIC ROCK	TRACHYTE			QUATERNARY		62.77	0.841803	4.89367	32.0936	0.361614	0.92	15.56	6.16				4.32	1.47	0.11	2.48	4.83	0.3	1		11					16.9	0.5			20.3		69.9	193.3	39.5	298.2	10.1	2.5	320.9	24.1
2014	[18073] 諾DEMIR Y.(2014) [GeoReM [7896] ]	ANATOLIA-IRAN BELT - CENOZOIC/QUATERNARY / TURKEY / EASTERN ANATOLIAN VOLCANIC BELT / SUPHAN DAG/	42.98	38.92	39.15	VOLCANIC ROCK	TRACHYTE			QUATERNARY		63.8	0.919704	4.92248	31.6969	0.379003	0.86	16.06	5.42				3.63	1.27	0.1	2.71	4.82	0.27	1		10					15.2	0.9			19.7		72.2	190.5	38.7	304.7	9.7	2.6	336.8	24
2014	[18073] 諾DEMIR Y.(2014) [GeoReM [7896] ]	ANATOLIA-IRAN BELT - CENOZOIC/QUATERNARY / TURKEY / EASTERN ANATOLIAN VOLCANIC BELT / SUPHAN DAG/	42.98	38.92	39.15	VOLCANIC ROCK	TRACHYTE			QUATERNARY		63.19	0.911648	4.91608	31.5238	0.348032	0.98	16.22	6.41				3.9	1.49	0.12	2.47	4.88	0.31	-0.2		11					17.5	0.6			20.3		73.4	210.9	42.9	317	10.5	2.6	345.1	24.7
2014	[18073] 諾DEMIR Y.(2014) [GeoReM [7896] ]	ANATOLIA-IRAN BELT - CENOZOIC/QUATERNARY / TURKEY / EASTERN ANATOLIAN VOLCANIC BELT / SUPHAN DAG/	42.98	38.92	39.15	VOLCANIC ROCK	DACITE			QUATERNARY		65.26	0.923576	5.41176	32.2853	0.391304	0.67	15.28	4.86				3.5	1.17	0.1	2.81	4.34	0.293	1.5		9					9.8	1.3			18.1		82.8	211.6	39.1	321.7	17.2	2.6	436	30.3
2014	[18073] 諾DEMIR Y.(2014) [GeoReM [7896] ]	ANATOLIA-IRAN BELT - CENOZOIC/QUATERNARY / TURKEY / EASTERN ANATOLIAN VOLCANIC BELT / SUPHAN DAG/	42.98	38.92	39.15	VOLCANIC ROCK	DACITE			QUATERNARY		63.31	0.880686	5.53213	33.5214	0.379182	0.88	15.31	5.97				4	1.52	0.11	2.67	4.39	0.46	1.2		10					13.4	1.3			18.3		81.6	215.2	38.9	262.8	15.7	2.6	398	28.9
2018	[21910] LECHMANN A. (2018)	ANATOLIA-IRAN BELT - CENOZOIC/QUATERNARY / IRAN / LESSER CAUCASUS//	44.2476	38.9213	41.25	VOLCANIC ROCK	TRACHYDACITE			MIOCENE		64.84	0.939955	35.7609	34.5399	0.348024	0.36	17	2.74				2.45	0.73	0.05	5.77	4.49	0.176	0.6		3.5		43	0		6.9	11.6	8.9	26	17.6		229	658	18.4	245	20	6.1	1216	72
2018	[21910] LECHMANN A. (2018)	ANATOLIA-IRAN BELT - CENOZOIC/QUATERNARY / IRAN / LESSER CAUCASUS//	44.5438	38.8082	41.25	VOLCANIC ROCK	TRACHYANDESITE			PLIOCENE		56.56	0.999825	40.1429	37.377	0.119217	0.6	19.45	5.11				4.1	1.54	0.09	6.04	3.32	0.358	1.99		3.3		98	0		11.3	6.1	16.9	76	22		134	1124	28	387	40	5.9	1577	129
2018	[21910] LECHMANN A. (2018)	ANATOLIA-IRAN BELT - CENOZOIC/QUATERNARY / IRAN / LESSER CAUCASUS//	44.6253	38.4649	41.25	VOLCANIC ROCK	ANDESITE			MIOCENE		59.09	0.963533	30.65	38.2083	0.189233	0.52	15.4	4.42				5.23	1.38	0.1	3.58	1.58	0.215	7.93		5.9		64	0		8.2	3.1	5.5	88	18.1		116	613	20	159	15.3	20	924	39
2018	[21910] LECHMANN A. (2018)	ANATOLIA-IRAN BELT - CENOZOIC/QUATERNARY / IRAN / LESSER CAUCASUS//	44.6113	38.547	41.25	VOLCANIC ROCK	TRACHYANDESITE			MIOCENE		61.83	0.881224	41.5508	37.9058	0.140283	0.42	17.35	4.25				5.08	1.31	0.1	3.38	4.13	0.187	1.52		4.4		57	0		9.3	8.8	7	55	18.8		109	777	18.7	169	14.2	1.8	1275	39
2007	[10284] JAHANGIRI A. (2007)	ANATOLIA-IRAN BELT - CENOZOIC/QUATERNARY / IRAN / SANANDAJ-SIRJAN ARC//	45.77	38.42	43.79	VOLCANIC ROCK	DACITE	10000000	17000000	MIOCENE		66.46	0.788702	46.0625	41.0798	0.127544	0.682	14.5	3.92				4.54	1.38	0.07	3.28	4	0.338	0.54			4085	68	38		13	46	25	55	12		94	737	16	217	15		795	18
2007	[10284] JAHANGIRI A. (2007)	ANATOLIA-IRAN BELT - CENOZOIC/QUATERNARY / IRAN / SANANDAJ-SIRJAN ARC//	45.77	38.42	43.79	VOLCANIC ROCK	DACITE	10000000	17000000	MIOCENE		66.81	0.850545	42.2941	38.3062	0.130737	0.351	15.19	3.7				4.18	1.16	0.06	3.46	3.96	0.351	0.13			2432	57	39		9	36	16	50	17		94	719	17	203	18		742	45
2007	[10284] JAHANGIRI A. (2007)	ANATOLIA-IRAN BELT - CENOZOIC/QUATERNARY / IRAN / SANANDAJ-SIRJAN ARC//	45.77	38.42	43.79	VOLCANIC ROCK	DACITE	10000000	17000000	MIOCENE		67.11	0.79709	40.9444	40.3254	0.12483	0.674	14.53	3.81				4.37	1.3	0.06	3.3	4.08	0.334	0.37			4037	63	42		6	42	19	53	22		92	737	18	214	19		764	6.34
2007	[10284] JAHANGIRI A. (2007)	ANATOLIA-IRAN BELT - CENOZOIC/QUATERNARY / IRAN / SANANDAJ-SIRJAN ARC//	45.77	38.42	43.79	VOLCANIC ROCK	DACITE	10000000	17000000	MIOCENE		66.76	0.838536	29.5	39.2904	0.161017	0.62	14.26	4.07				4.66	1.33	0.1	3.37	2.97	0.239	1.33			3714	72	5		7	9	12	44	15		95	590	20	183	9		958	33
2007	[10284] JAHANGIRI A. (2007)	ANATOLIA-IRAN BELT - CENOZOIC/QUATERNARY / IRAN / SANANDAJ-SIRJAN ARC//	45.77	38.42	43.79	VOLCANIC ROCK	DACITE	10000000	17000000	MIOCENE		65.73	0.849481	31.0526	38.4008	0.157627	0.596	15.41	4.13				4.64	1.3	0.1	3.54	3.57	0.235	0.62			3570	64	1			10	1	87	16		93	590	19	198	16		886	49.3
2007	[10284] JAHANGIRI A. (2007)	ANATOLIA-IRAN BELT - CENOZOIC/QUATERNARY / IRAN / SANANDAJ-SIRJAN ARC//	45.77	38.42	43.79	VOLCANIC ROCK	DACITE	10000000	17000000	MIOCENE		65.44	0.85587	28.7565	42.4013	0.181982	0.606	14.5	4.17				4.55	1.55	0.12	3.83	2.75	0.227	1.82			3630	63	1		3	4	1	53	17		101	555	19.3	199	15		953	28
2017	[21548] KHEZERLOU A. K. (2017)	ANATOLIA-IRAN BELT - CENOZOIC/QUATERNARY / IRAN / SANANDAJ-SIRJAN ARC//	45.5	38.5	43.79	VOLCANIC ROCK	TRACHYANDESITE			PLIO-QUATERNARY		64.85	0.995922	51.7692	26.9635	0.0998514	0.64	17.15	5.15				3.69	0.96	0.05	3.48	4.1	0.31	0.82				109	11		28	7	18.7	62.8	18.6		67.2	673	13	83	13.5	9.1	1231	24.8
2014	[18365] JACQUES G.(2014) [GeoReM [8014] ]	ANDEAN ARC / SOUTHERN ANDEAN VOLCANIC ZONE / ARGENTINA///	-70.78	-38.65	36.7	VOLCANIC ROCK	ANDESITE, BASALTIC			HOLOCENE		56.68	0.823646	25.0847	38.9723	0.0631757	1.34	18.08			6.95		5.74	2.49	0.14	2.69	5.23	0.46	1.69	11.72	16.8		152	16		13.7	6.3	25.5	125.7	20.1		37.4	592	23.6	360	18.42	1.179	781	30.2
2014	[18365] JACQUES G.(2014) [GeoReM [8014] ]	ANDEAN ARC / SOUTHERN ANDEAN VOLCANIC ZONE / CHILE / LLAIMA//	-71.62	-38.75	41.66	VOLCANIC ROCK	ANDESITE			HOLOCENE		56.61	0.794854	14.6552	36.0864	0.0407059	1.23	16.22			10.26		6.8	3.25	0.18	0.85	4.33	0.25	0.44	14.4	39.2		241	16.5		23.1	8.26	93.4	99	22.6		17.3	425	29	107	2.78	1.5	259	10.3
2014	[18365] JACQUES G.(2014) [GeoReM [8014] ]	ANDEAN ARC / SOUTHERN ANDEAN VOLCANIC ZONE / CHILE / LONQUIMAY//	-71.53	-38.36	41.66	VOLCANIC ROCK	ANDESITE			HOLOCENE		61.42	0.811652	10.2545	18.4784	0.0684864	0.75	16.1			8.65		4.25	1.1	0.23	2.19	5.92	0.29	0.17	22.1	26.1		2.16	6.67		3.62	0.889	20.3	126	22		27.6	403	39.3	155	3.28	2.83	402	16.9
2014	[18365] JACQUES G.(2014) [GeoReM [8014] ]	ANDEAN ARC / SOUTHERN ANDEAN VOLCANIC ZONE / CHILE / LONQUIMAY//	-71.51	-38.34	41.66	VOLCANIC ROCK	ANDESITE			HOLOCENE		58.21	0.839227	12.8998	35.1694	0.045124	1.16	16.5			6.67		5.36	2.03	0.22	1.03	5.35	0.46	0.15	23.6	34.3		38.3	0.679		10.7	0	23.9	154	28.4		27.3	605	46.9	158	3.64	2.74	438	19.4
1988	[6652] MUNOZ J. B. (1988)	ANDEAN ARC / SOUTHERN ANDEAN VOLCANIC ZONE / CHILE / PINO HACHADO VOLCANIC COMPLEX//	-71	-39	41.66	VOLCANIC ROCK	TRACHYANDESITE			PLEISTOCENE		59.8	0.800305	8.66667	28.5465	0.203297	1.1	16.1		2	5.8	4	2.8	1.3	0.14	3.7	6.7	0.36														74	364	42	391	42		696
1988	[6652] MUNOZ J. B. (1988)	ANDEAN ARC / SOUTHERN ANDEAN VOLCANIC ZONE / CHILE / PINO SOLO//	-71	-39	41.66	VOLCANIC ROCK	NOT GIVEN			PLIOCENE		56.52	0.911694	20	39.5665	0.0921875	1.52	18.32		2.91	7.269	4.65	5.16	2.67	0.14	2.42	4.92	0.44					111	3			8					59	640	32	294	16		630
1988	[6652] MUNOZ J. B. (1988)	ANDEAN ARC / SOUTHERN ANDEAN VOLCANIC ZONE / CHILE / RAHUE//	-71.1	-38.73	41.66	VOLCANIC ROCK	ANDESITE			PLIOCENE		61.32	0.863708	17.6923	43.0072	0.136957	0.9	16.55		3.1	5.48	2.69	4.83	2.32	0.13	2.31	4.79	0.31					106	16			6					63	460	26	202	13		620
1988	[6652] MUNOZ J. B. (1988)	ANDEAN ARC / SOUTHERN ANDEAN VOLCANIC ZONE / CHILE / TOLHUACA//	-71	-39	41.66	VOLCANIC ROCK	NOT GIVEN			PLEISTOCENE		59.34	0.857287	8.97436	31.3164	0.137143	1.33	15.96		4.26	8.444	4.61	5.27	2.16	0.14	1.63	4.42	0.33					120	21			4					48	350	39	188	7		500
2007	[18171] LUSTRINO M. (2007)	LIGURIA-SARDO-TYRRHENIAN ARC / SARDINIA / SOUTHERN SARDINIA///	8.41	38.86	19.26	VOLCANIC ROCK	BENMOREITE			MIOCENE		56.25	0.853743	26.9667	43.2193	0.121137	1.62	17.61		6.51			3.77	2.78	0.16	3.97	5.76	0.65	1.02				57			5	5	5.7	128.1	22.8		98	809	30	387	78	6.6	966	70
2007	[18171] LUSTRINO M. (2007)	LIGURIA-SARDO-TYRRHENIAN ARC / SARDINIA / SOUTHERN SARDINIA///	8.41	38.86	19.26	VOLCANIC ROCK	BENMOREITE			MIOCENE		57.07	0.845943	38.7168	40.0249	0.129143	1.62	17.6		6.33			3.7	2.37	0.29	4.07	5.88	0.63	0.52				69				5		117.9			113	875	22.6	418	97		1046	69.4
2007	[18171] LUSTRINO M. (2007)	LIGURIA-SARDO-TYRRHENIAN ARC / SARDINIA / SOUTHERN SARDINIA///	8.41	38.86	19.26	VOLCANIC ROCK	TRACHYTE			MIOCENE		58.54	0.71978	19.4175	43.3272	0.235	0.98	16.33		4.15			4.26	1.78	0.15	4.61	6.05	1.78	1.41				39				5		95.5			141	600	30.9	389	70		906	73.7
2007	[18171] LUSTRINO M. (2007)	LIGURIA-SARDO-TYRRHENIAN ARC / SARDINIA / SOUTHERN SARDINIA///	8.41	38.86	19.26	VOLCANIC ROCK	TRACHYTE			MIOCENE		58.72	0.833682	30.4762	41.5305	0.180398	1.24	16.97		5.32			2.92	2.12	0.17	4.22	6.37	0.56	1.52				49				2		98.7			127	704	23.1	409	77		773	92.7
2007	[18171] LUSTRINO M. (2007)	LIGURIA-SARDO-TYRRHENIAN ARC / SARDINIA / SOUTHERN SARDINIA///	8.41	38.86	19.26	VOLCANIC ROCK	TRACHYTE			MIOCENE		58.85	0.872928	23.5315	32.5544	0.166419	1.31	17.6		5.65			2.81	1.53	0.13	4.53	6.17	0.56	0.94				40			59	6		107.8	21.5		112	673	28.6	492	83	2.7	812	86.4
2007	[18171] LUSTRINO M. (2007)	LIGURIA-SARDO-TYRRHENIAN ARC / SARDINIA / SOUTHERN SARDINIA///	8.41	38.86	19.26	VOLCANIC ROCK	TRACHYTE			MIOCENE		58.89	0.734583	19.1536	42.8043	0.245499	1.06	16.4		4.43			4.04	1.86	0.16	4.63	6.06	1.63	0.92				44				5		96.1			150	611	31.9	415	73		881	66.1
2007	[18171] LUSTRINO M. (2007)	LIGURIA-SARDO-TYRRHENIAN ARC / SARDINIA / SOUTHERN SARDINIA///	8.41	38.86	19.26	VOLCANIC ROCK	TRACHYTE			MIOCENE		59.29	0.896212	69.6875	36.8527	0.216741	1.25	17.9		5.07			2.48	1.66	0.11	5.32	5.9	0.52	0.53				52				4		68.5			145	669	9.6	442	85		894	72.1
2007	[18171] LUSTRINO M. (2007)	LIGURIA-SARDO-TYRRHENIAN ARC / SARDINIA / SOUTHERN SARDINIA///	8.41	38.86	19.26	VOLCANIC ROCK	TRACHYTE			MIOCENE		60.86	0.901535	27.7477	31.4626	0.233766	1.09	17.36		4.97			2.07	1.28	0.17	4.86	6.22	0.46	0.73				41				5		92.6			144	616	22.2	491	104		796	83.6
2016	[23153] GISBERT G. (2016)	LIGURIA-SARDO-TYRRHENIAN ARC / SARDINIA / SOUTHERN SARDINIA///	8.4091	38.9689	19.26	VOLCANIC ROCK	ANDESITE			NEOGENE		57.385	0.93792	12.3898	35.915	0.203368	0.815	17.73	8.605				6.89	2.435	0.16	1.765	2.715	0.23	0.654081	12.9377	19.2244		115	20.2993		45.6	4.05401	19.6464	100.5	18.3	2.03209	64	314.7	25.4	146.2	11	1.83826	375.4	24.6403
2016	[23153] GISBERT G. (2016)	LIGURIA-SARDO-TYRRHENIAN ARC / SARDINIA / SOUTHERN SARDINIA///	8.4107	38.9675	19.26	VOLCANIC ROCK	ANDESITE			NEOGENE		56.915	0.921606	14.1703	39.737	0.180277	0.81	17.87	8.59				7.265	2.86	0.17	1.615	2.695	0.225	0.377148				135.6	0		36.2	0	12.9	97.5	19		58.5	324.5	22.9	142.6	10.6		401
2016	[23153] GISBERT G. (2016)	LIGURIA-SARDO-TYRRHENIAN ARC / SARDINIA / SOUTHERN SARDINIA///	8.4107	38.9675	19.26	VOLCANIC ROCK	ANDESITE			NEOGENE		56.84	0.932236	13.9356	36.8033	0.177702	0.825	17.95	8.655				7.245	2.545	0.14	1.63	2.625	0.225	0.715809	9.10901	21.5202		122.5	24.836		32.6	4.31841	17.0917	94.8	19.4	2.89246	57.7	324.7	23.3	140.9	10.7	1.42586	417.1	23.2045
2016	[23153] GISBERT G. (2016)	LIGURIA-SARDO-TYRRHENIAN ARC / SARDINIA / SOUTHERN SARDINIA///	8.4107	38.9675	19.26	VOLCANIC ROCK	ANDESITE			NEOGENE		57.615	0.939466	13.4664	34.9863	0.188145	0.815	18.05	8.575				7.06	2.33	0.125	1.735	2.735	0.23	0.601735				126.7	0		34.6	0	9.2	97	17.5		56.5	300.3	22.3	138.4	10.9		339.8
2016	[23153] GISBERT G. (2016)	LIGURIA-SARDO-TYRRHENIAN ARC / SARDINIA / SOUTHERN SARDINIA///	8.4139	38.9665	19.26	VOLCANIC ROCK	ANDESITE			NEOGENE		57.045	0.93847	13.3952	37.7783	0.188411	0.75	18.315	7.535				7.275	2.31	0.15	1.57	2.79	0.255	1.31619				97.5	0		41.8	0	10	85.1	16.2		53	281.3	21	153.4	10.5		287.9
1995	[13417] APARICIO A. Y. (1995)	EUROPEAN OROGENIC BELT - CENOZOIC/QUATERNARY / SPAIN / VALENCIA TROUGH//	0.67	39.87	17.66	VOLCANIC ROCK	TRACHYANDESITE	300000	1000000	PLEISTOCENE		58	0.593751	27.8571	32.8917	0.131624	1.24	14.57		5.85	5.455	0.19	4.74	1.5	0.14	4.04	7.02	0.42					66	2		8		10				77	585	21	460	97		650	50
1995	[13417] APARICIO A. Y. (1995)	EUROPEAN OROGENIC BELT - CENOZOIC/QUATERNARY / SPAIN / VALENCIA TROUGH//	0.67	39.87	17.66	VOLCANIC ROCK	PHONOLITE	300000	1000000	PLEISTOCENE		57	0.871896	24.8235	26.4284	0.267773	0.81	20.31		2.25	4.565	2.54	3.2	0.92	0.12	4.58	7.61	0.25					37	11		0		7				113	422	17	334	90		593	42
1995	[13417] APARICIO A. Y. (1995)	EUROPEAN OROGENIC BELT - CENOZOIC/QUATERNARY / SPAIN / VALENCIA TROUGH//	0.67	39.87	17.66	VOLCANIC ROCK	PHONOLITE	300000	1000000	PLEISTOCENE		57.7	0.899202	21.8125	26.5282	0.372493	0.68	20.4		2.92	4.048	1.42	2.79	0.82	0.12	4.89	7.49	0.21					19			0		5				130	349	16	36	86		559	40
1995	[13417] APARICIO A. Y. (1995)	EUROPEAN OROGENIC BELT - CENOZOIC/QUATERNARY / SPAIN / VALENCIA TROUGH//	0.67	39.87	17.66	VOLCANIC ROCK	PHONOLITE	300000	1000000	PLEISTOCENE		56.5	0.887498	21.5625	43.4089	0.344928	0.56	20.36		3.25	3.625	0.7	2.74	1.56	0.12	4.92	7.68	0.16					14			0		0				119	345	16	326	80		532	36
1995	[13417] APARICIO A. Y. (1995)	EUROPEAN OROGENIC BELT - CENOZOIC/QUATERNARY / SPAIN / VALENCIA TROUGH//	0.67	39.87	17.66	VOLCANIC ROCK	PHONOLITE	300000	1000000	PLEISTOCENE		58	0.874898	23.6667	31.9421	0.332394	0.54	20.43		3.32	3.418	0.43	2.7	0.9	0.11	4.88	8	0.15					19					62				118	355	15	324	79		535	32
1995	[13417] APARICIO A. Y. (1995)	EUROPEAN OROGENIC BELT - CENOZOIC/QUATERNARY / SPAIN / VALENCIA TROUGH//	0.67	39.87	17.66	PLUTONIC ROCK	SYENITE	300000	1000000	PLEISTOCENE		56.27	0.936538	30.2632	21.5413	0.168696	0.81	21.32		3.8	4.09	0.67	3.57	0.63	0.2	5.43	6.32	0.36					47	8		0		0				97	575	19	306	94		783	49
1995	[13417] APARICIO A. Y. (1995)	EUROPEAN OROGENIC BELT - CENOZOIC/QUATERNARY / SPAIN / VALENCIA TROUGH//	0.67	39.87	17.66	PLUTONIC ROCK	TRACHYSYENITE	300000	1000000	PLEISTOCENE		63.27	0.822823	9.75862	39.8235	0.127208	0.45	18.13		1.69	2.451	0.93	3.58	0.91	0.06	1.06	8.74	0.18					16					6				36	283	29	493	104		81	57
1995	[13417] APARICIO A. Y. (1995)	EUROPEAN OROGENIC BELT - CENOZOIC/QUATERNARY / SPAIN / VALENCIA TROUGH//	0.67	39.87	17.66	VOLCANIC ROCK	PHONOLITE	300000	1000000	PLEISTOCENE		56.71	0.851338	18.8	38.075	0.172872	0.64	21.04		2.06	2.754	0.9	3.01	0.95	0.17	4.6	8.67	0.28					39	5		0	10	6				65	376	20	595	103		431	55
1989	[4261] TAMURA S. (1989)	HONSHU ARC / NORTHEASTERN HONSHU ARC / HONSHU / FUKUYAMA ANDESITES//	139.5	39.3	24.55	VOLCANIC ROCK	ANDESITE, HORNBLENDE-HYPERSTHENE-AUGITE-PLAGIOCLASE			MIOCENE		62.98	0.912493	20.3889	43.0873	0.244687	0.61	16.72			4.85		5.14	2.06	0.12	2.17	4.03	0.22														89.8	367	18	126	5.7
1989	[4261] TAMURA S. (1989)	HONSHU ARC / NORTHEASTERN HONSHU ARC / HONSHU / FUKUYAMA ANDESITES//	139.5	39.3	24.55	VOLCANIC ROCK	ANDESITE, HORNBLENDE-HYPERSTHENE-AUGITE-PLAGIOCLASE			MIOCENE		62.45	0.997607	20.9444	42.909	0.230239	0.59	16.73			5.17		5.25	2.18	0.12	2.07	3.03	0.21														86.8	377	18	124	3.7
1989	[4261] TAMURA S. (1989)	HONSHU ARC / NORTHEASTERN HONSHU ARC / HONSHU / FUKUYAMA ANDESITES//	139.5	39.3	24.55	VOLCANIC ROCK	ANDESITE, HORNBLENDE-HYPERSTHENE-AUGITE-PLAGIOCLASE			MIOCENE		63.27	0.915941	18.9	42.6272	0.233598	0.61	16.87			4.87		5.18	2.03	0.12	2.16	4.05	0.21														88.3	378	20	128	4.1
1989	[4261] TAMURA S. (1989)	HONSHU ARC / NORTHEASTERN HONSHU ARC / HONSHU / FUKUYAMA ANDESITES//	139.5	39.3	24.55	VOLCANIC ROCK	ANDESITE, HYPERSTHENE-AUGITE-PLAGIOCLASE			MIOCENE		61.57	0.916797	22.0588	40.0345	0.2592	0.6	16.5			5.66		5.09	2.12	0.13	2.12	3.92	0.21														97.2	375	17	128	5
1989	[4261] TAMURA S. (1989)	HONSHU ARC / NORTHEASTERN HONSHU ARC / HONSHU / FUKUYAMA ANDESITES//	139.5	39.3	24.55	VOLCANIC ROCK	DACITE, HYPERSTHENE-AUGITE-PLAGIOCLASE			MIOCENE		66.83	0.901203	23.8667	38.7864	0.261732	0.61	16.18			3.01		4.74	1.07	0.08	2.47	4.05	0.21														93.7	358	15	125	4.6
1989	[4261] TAMURA S. (1989)	HONSHU ARC / NORTHEASTERN HONSHU ARC / HONSHU / FUKUYAMA ANDESITES//	139.5	39.3	24.55	VOLCANIC ROCK	ANDESITE, HORNBLENDE-HYPERSTHENE-AUGITE-PLAGIOCLASE			MIOCENE		63.15	0.921694	25.8571	42.8663	0.271271	0.59	16.66			4.3		4.6	1.81	0.11	2.24	4.43	0.1														98.2	362	14	128	4.8
1989	[4261] TAMURA S. (1989)	HONSHU ARC / NORTHEASTERN HONSHU ARC / HONSHU / SHINZAN ANDESITES//	139.5	39.3	24.55	VOLCANIC ROCK	ANDESITE, HYPERSTHENE-AUGITE-HORNBLENDE-PLAGIOCLASE			MIOCENE		60.21	0.906285	19.5714	44.8254	0.16326	0.64	17.27			5.09		5.98	2.32	0.13	2.15	3.56	0.23														67.1	411	21	122	3.3
1990	[3409] SHUTO K. (1990)	HONSHU ARC / NORTHEASTERN HONSHU ARC / HONSHU / AONOKIMORI//	140.8	39.8	28.8	VOLCANIC ROCK	DACITE, AUGITE-HYPERSTHENE-QUARTZ-PLAGIOCLASE			PLIOCENE		62.14	0.994766	4.57143	41.601	0.146875	0.67	16.27		2.84	6.956	4.4	6.34	2.78	0.16	0.92	2.33	0.07						26			7					28.2	192	42	86
1990	[3409] SHUTO K. (1990)	HONSHU ARC / NORTHEASTERN HONSHU ARC / HONSHU / AONOKIMORI//	140.8	39.8	28.8	VOLCANIC ROCK	DACITE, AUGITE-HYPERSTHENE-PLAGIOCLASE			PLIOCENE		61.82	0.982072	4.94737	41.4956	0.129787	0.65	16.34		4.24	6.936	3.12	6.39	2.76	0.14	0.93	2.44	0.07						22			7					24.4	188	38	85
1990	[3409] SHUTO K. (1990)	HONSHU ARC / NORTHEASTERN HONSHU ARC / HONSHU / AONOKIMORI//	140.8	39.8	28.8	VOLCANIC ROCK	DACITE, AUGITE-HYPERSTHENE-QUARTZ-PLAGIOCLASE			PLIOCENE		65.17	0.930714	5.9697	38.9201	0.160914	0.7	15.49		2.3	6.21	4.14	5.7	2.22	0.14	1.06	3.12	0.08						10			2					31.7	197	33	85
1990	[3409] SHUTO K. (1990)	HONSHU ARC / NORTHEASTERN HONSHU ARC / HONSHU / AONOKIMORI//	140.8	39.8	28.8	VOLCANIC ROCK	ANDESITE, AUGITE-HYPERSTHENE-PLAGIOCLASE			PLIOCENE		61.73	0.920781	6.64286	41.2111	0.143548	0.66	16.3		3.15	7.145	4.31	6.55	2.81	0.13	0.93	2.91	0.07						14			11					26.7	186	28	83	2.2
1990	[3409] SHUTO K. (1990)	HONSHU ARC / NORTHEASTERN HONSHU ARC / HONSHU / AONOKIMORI//	140.8	39.8	28.8	VOLCANIC ROCK	ANDESITE, AUGITE-HYPERSTHENE-PLAGIOCLASE			PLIOCENE		60.55	0.914926	6.48276	43.4713	0.125	0.67	16.55		3.27	7.023	4.08	6.97	3.03	0.13	0.84	2.74	0.07						23			10					23.5	188	29	80	3.1
1990	[3409] SHUTO K. (1990)	HONSHU ARC / NORTHEASTERN HONSHU ARC / HONSHU / AONOKIMORI//	140.8	39.8	28.8	VOLCANIC ROCK	DACITE, AUGITE-HYPERSTHENE-HORNBLENDE-QUARTZ-PLAGIOCLASE			PLIOCENE		62.8	0.892573	8.14815	42.9444	0.177727	0.69	15.9		3.35	6.465	3.45	6.39	2.73	0.14	1.18	2.99	0.08						21			5					39.1	220	27	82
1990	[3409] SHUTO K. (1990)	HONSHU ARC / NORTHEASTERN HONSHU ARC / HONSHU / AONOKIMORI//	140.8	39.8	28.8	VOLCANIC ROCK	ANDESITE, AUGITE-HYPERSTHENE-PLAGIOCLASE			PLIOCENE		60.03	0.88778	5.79412	44.8971	0.150761	0.65	16.69		2.84	7.416	4.86	7.31	3.39	0.15	0.88	2.77	0.06						38			8					29.7	197	34	79
1990	[3409] SHUTO K. (1990)	HONSHU ARC / NORTHEASTERN HONSHU ARC / HONSHU / AONOKIMORI//	140.8	39.8	28.8	VOLCANIC ROCK	ANDESITE, AUGITE-HYPERSTHENE-PLAGIOCLASE			PLIOCENE		60.52	0.981917	5.18421	41.7145	0.101523	0.68	16.87		4.83	7.347	3	6.45	2.95	0.14	0.54	2.96	0.07						21			6					20	197	38	92
1989	[4261] TAMURA S. (1989)	HONSHU ARC / NORTHEASTERN HONSHU ARC / HONSHU / ARAKAWA ANDESITES//	140.5	39.5	28.8	VOLCANIC ROCK	DACITE, HYPERSTHENE-AUGITE-PLAGIOCLASE			MIOCENE		65.29	0.93687	8.05882	30.1367	0.105839	0.88	15.17			6.57		4.74	1.59	0.14	1.8	3.42	0.24														29	274	34	110	1.5
[truncated: 706 more rows]
[truncated: 22 more columns]

## Sheet: references
[10000] CORSARO R. A., CRISTOFOLINI R., PATANE L.: THE 1669 ERUPTION OF MOUNT ETNA: CHRONOLOGY, PETROLOGY AND GEOCHEMISTRY, WITH INFERENCES ON THE MAGMA SOURCES AND ASCENT MECHANISMS | BULL. VOLCANOL. 58 [1996] 348-358 | doi: 10.1007/s004450050144
[truncated: 7,026 more rows]
